# Supplementary material for: Genetic dissection of yield and yield-related traits in mungbean based on QTL meta-analysis
Source: Front Genet. 2025 May 8;16:1600979. doi: 10.3389/fgene.2025.1600979 (PMC12095261; doi:10.3389/fgene.2025.1600979)
Supplement: Supplementary file 1 [file Table1.xlsx]

## Sheet: Table S1
Table S1. Consensus map file format for QTL meta-analysis
mapname=mungbean map
poptype=DH1
	chromosome LG1
1	GMES4101	0	cM
2	HAAS_VR_1142	0	cM
3	Block1	0	cM
4	vr2-1362	0	cM
5	P2-536	0	cM
6	ID1-1	0.287	cM
7	Block2	0	cM
8	Block3	0.873	cM
9	Block110	0	cM
10	Block111	0	cM
11	Block4	0	cM
12	Block48	0	cM
13	Block69	0.32	cM
14	ID1-2	0.22	cM
15	VrD1	0.038	cM
16	Block195	0.262	cM
17	p3-354	0.025	cM
18	Block201	0.287	cM
19	Block203	0.388	cM
20	HAAS_VR_1904	0.5	cM
21	VrCS352	0.888	cM
22	Block204	0	cM
23	Block205	0	cM
24	Block230	0	cM
25	Block231	0	cM
26	Block232	0	cM
27	Block259	0.112	cM
28	VrCS84-3	0.176	cM
29	Block269	0.524	cM
30	X182	0.054	cM
31	Block270	0	cM
32	Block273	0.287	cM
33	Block304	1.059	cM
34	VrCS53	0.111	cM
35	Block305	0	cM
36	Block307	0	cM
37	Block314	0	cM
38	Block320	0.578	cM
39	Block335	0	cM
40	Block338	0	cM
41	Block339	0	cM
42	Block343	0	cM
43	Block345	0	cM
44	Block359	0	cM
45	Block402	0	cM
46	Block423	0	cM
47	Block508	0	cM
48	Block540	0	cM
49	Block541	0.287	cM
50	Block542	0.224	cM
51	Mchr2-9	0.064	cM
52	Block561	0	cM
53	Block562	0	cM
54	Block564	0	cM
55	Block571	0.436	cM
56	P2-463	0.142	cM
57	Block629	0.258	cM
58	p3-368	0.029	cM
59	Block650	0.872	cM
60	Block652	0.499	cM
61	X40	0.69	cM
62	ID1-3	0.41	cM
63	CEDC036	0.6	cM
64	X46	1	cM
65	P1-1843	0.1	cM
66	GMES1604	1.2	cM
67	CEDG141	0	cM
68	CEDG263	0	cM
69	cp02345	0.06	cM
70	ID1-11	0.84	cM
71	GMES3316c	0.2	cM
72	P1-1692	0.45	cM
73	ID1-10	1.65	cM
74	P1-2021	1.234	cM
75	Block747	0.966	cM
76	VrCS215-3	0.1	cM
77	CEDG003	1.4	cM
78	VrCS321	0.7	cM
79	MUS540	0.1	cM
80	GMES5438	0.4	cM
81	PM178	0.3	cM
82	VrCS49-2	1.2	cM
83	Mchr2-16	0	cM
84	P2-457	1.4	cM
85	CEDG053	0.9	cM
86	B51	0.4	cM
87	B42	0.6	cM
88	CEDG001	0.4	cM
89	CEDG093	0.3	cM
90	P1-379	0.1	cM
91	GMES1216b	0.018	cM
92	Block760	1.182	cM
93	CEDG300	0.289	cM
94	Block770	0	cM
95	Block782	0.288	cM
96	Block819	0	cM
97	Block842	0.023	cM
98	P1-2279	0.264	cM
99	Block897	0	cM
100	Block898	0.406	cM
101	ID1-9	0.43	cM
102	P1-2222	0.334	cM
103	Block913	0	cM
104	Block953	0	cM
105	Block959	0.066	cM
106	CEDG291	0.221	cM
107	Block986	0.179	cM
108	GMES3628	0.108	cM
109	Block999	0.092	cM
110	MUS379	0.3	cM
111	P2-44	0.3	cM
112	cp05660	0.4	cM
113	CEDG048	0.078	cM
114	Block1018	0.222	cM
115	Mchr2-21	0.1	cM
116	CEDG204	0	cM
117	cp02661	0	cM
118	cp06328	0	cM
119	GMES1885	0.4	cM
120	GMES3004b	0	cM
121	GMES0294c	0	cM
122	GMES0504	0	cM
123	GMES1093	0.1	cM
124	GMES1316	0	cM
125	GMES1743	0.9	cM
126	C54	0.363	cM
127	Block1026	0.307	cM
128	ID1-7	0.614	cM
129	Block1072	0.287	cM
130	Block1068	0.199	cM
131	ID1-6	0.37	cM
132	ID1-8	0.06	cM
133	GMES3145	0	cM
134	GMES5010	0.4	cM
135	P2-143	0.8	cM
136	cp07770	0.4	cM
137	CEDG191	0.3	cM
138	VrCS356-1	0.2	cM
139	GMES5666	0	cM
140	X144	0.5	cM
141	Mchr2-27	0.2	cM
142	Mchr1-20	0	cM
143	CEDG037	0.9	cM
144	DMBSSR038	0.4	cM
145	GMES5032	0.261	cM
146	Block1109	0.339	cM
147	MUS275	0	cM
148	B54	0.239	cM
149	Block1129	0.561	cM
150	C265	0.3	cM
151	CEDCAA001a	0.2	cM
152	C266	0.2	cM
153	Mchr2-29	0.59	cM
154	ID1-5	0.51	cM
155	C30	0.036	cM
156	Block1131	0.064	cM
157	CEDG241	0	cM
158	X21	0.2	cM
159	Mchr2-33	0.2	cM
160	GMES1471	0.408	cM
161	Block1178	0.287	cM
162	Block1186	0.005	cM
163	vr2-2112	0.1	cM
164	P1-492	0.183	cM
165	Block1247	0.517	cM
166	C276	0.3	cM
167	VrCS207	0.1	cM
168	Mchr2-36	0.253	cM
169	Block1259	0.647	cM
170	pQ62-2	0.5	cM
171	MUS815	0	cM
172	P2-539	0.08	cM
173	Block1286	0.82	cM
174	P2-3	0.052	cM
175	Block1316	0.048	cM
176	CEDG214	0.4	cM
177	Mchr2-41	0.4	cM
178	CEDG012	0.024	cM
179	Block1497	0.176	cM
180	P2-61	0.4	cM
181	P1-534	0.002	cM
182	Block1518	0.698	cM
183	CEDG256	0.2	cM
184	P1-1037	0.2	cM
185	cp04220	0.1	cM
186	VrCS307	0.15	cM
187	ID1-4	0.45	cM
188	P3-898	0.7	cM
189	VrCS358-1	0.2	cM
190	P2-438	0.016	cM
191	Block1561	0.287	cM
192	Block1664	0.197	cM
193	P2-665	0.5	cM
194	CEDG231	0	cM
195	GMES1086a	0	cM
196	P1-149	0.6	cM
197	P2-436	0.6	cM
198	P1-1370	0.1	cM
199	P1-113	0.4	cM
200	CEDG128	0	cM
201	P2-208	0.1	cM
202	MB-SSR81	0.2	cM
203	P1-888	0.1	cM
204	p3-1269	0	cM
205	p3-588	0.4	cM
206	cp06173	0.1	cM
207	P1-920	0.3	cM
208	p3-742	0	cM
209	C53	0.1	cM
210	cp05137	0.2	cM
211	p3-439	0.7	cM
212	P1-835	0.3	cM
213	Mchr2-50	0	cM
214	p3-582	0	cM
215	D02	0.4	cM
216	H8	0.9	cM
217	X150	0.2	cM
218	P1-715	0.4	cM
219	HAAS_VR_1620	0	cM
220	P1-775	0.2	cM
221	X45	0.3	cM
222	P2-280	0.3	cM
223	X24	0.418	cM
224	Block1668	0.082	cM
225	vr2-2195	0.1	cM
226	B44	0.3	cM
227	P1-886	0.096	cM
228	Block1671	0.204	cM
229	P1-1600	0.1	cM
230	VCS49-1	0.274	cM
231	Block1674	0	cM
232	Block1675	0.459	cM
233	Block1676	0.067	cM
234	P1-1656	0.511	cM
235	Block1677	0.089	cM
236	P2-622	0.1	cM
237	P1-1657	0.098	cM
238	Block1678	0.602	cM
239	P1-1694	0.148	cM
240	Block1680	0.152	cM
241	C305	0.3	cM
242	VrCS51	0.2	cM
243	P1-1721	0.212	cM
244	Block1682	0.388	cM
245	P2-629	0.2	cM
246	C49-1	0.218	cM
247	Block1683	0.282	cM
248	P1-348	0.2	cM
249	P1-1737	0.619	cM
250	Block1685	0.081	cM
251	P1-1168	0.148	cM
252	Block1686	0.352	cM
253	P1-1818	0.3	cM
254	p3-97	0.154	cM
255	Block1691	0.146	cM
256	L19	0.083	cM
257	Block1690	0.317	cM
258	P1-1318	0.199	cM
259	Block1688	0.101	cM
260	L18	0.415	cM
261	Block1689	0.485	cM
262	J21	0.031	cM
263	Block1693	0.516	cM
264	Block1696	0.553	cM
265	CEDG074b	0.253	cM
266	Block1699	0.229	cM
267	Block1701	0.818	cM
268	VrCS364	0.4	cM
269	CEDG220	0.4	cM
270	GMES4400	0.196	cM
271	Block1865	0.204	cM
272	GMES3716	0.082	cM
273	Block2043	0.286	cM
274	Block3963	0	cM
275	Block4153	0.032	cM
276	pO103	0.253	cM
277	Block2888	0.247	cM
278	GMES0703b	0.039	cM
279	Block3363	0	cM
280	Block3365	0	cM
281	Block3366	0	cM
282	Block3387	0	cM
283	Block3419	0	cM
284	Block3662	0.286	cM
285	Block3949	0.4	cM
286	Block2394	0.075	cM
287	cp01713	0	cM
288	GMES3213a	0.268	cM
289	Block2311	0.342	cM
290	Block2295	0.343	cM
291	Block1962	0.247	cM
292	CEDG051	0.153	cM
293	Block2648	0.247	cM
294	CEDG087	0.096	cM
295	Block4154	0.288	cM
296	Block4484	0	cM
297	Block4485	0	cM
298	Block4486	0	cM
299	Block4489	0.287	cM
300	Block4491	0.287	cM
301	Block4490	0.288	cM
302	Block4492	0	cM
303	Block4493	0	cM
304	Block4494	0.287	cM
305	Block4496	0.287	cM
306	Block4503	0	cM
307	Block4730	0.28	cM
308	GMES2225	0.356	cM
309	Block4788	0.287	cM
310	Block4785	0.635	cM
311	Block4811	0.807	cM
312	Block5016	0.578	cM
313	Block4886	0.287	cM
314	Block5019	0	cM
315	Block5020	0	cM
316	Block5021	0	cM
317	Block5022	0	cM
318	Block5024	0.172	cM
319	Block5017	0	cM
320	Block5018	0.285	cM
321	Block5028	0	cM
322	Block5029	0.793	cM
323	VrCS364	0.08	cM
324	Block5052	0.578	cM
325	Block5051	0	cM
326	Block5053	0	cM
327	Block5061	0.042	cM
328	CEDG254	0.245	cM
329	Block5062	0.578	cM
330	Block5089	0.287	cM
331	Block5075	0	cM
332	Block5097	0.578	cM
333	Block5122	0.012	cM
334	GMES0709b	0.276	cM
335	Block5112	1.324	cM
336	cp06039	0	cM
337	vr2-2198	0.147	cM
338	Block5128	0.253	cM
339	GMES2415	0.619	cM
340	Block5232	1.081	cM
341	GMES0844	0.4	cM
342	GMES3004a	0.295	cM
343	Block5234	1.17	cM
344	Block5245	0.135	cM
345	GMES2320	0.152	cM
346	Block5249	0	cM
347	Block5255	2.714	cM
348	Block5872	0.578	cM
349	Block6118	0	cM
350	Block6143	0.578	cM
351	Block6385	0	cM
352	Block6595	0	cM
353	Block6635	0	cM
354	Block6636	0	cM
355	Block6671	0	cM
356	Block6684	0	cM
357	Block6784	0	cM
358	Block6785	0	cM
359	Block6787	0	cM
360	Block6789	0.287	cM
361	Block6195	0	cM
362	Block6199	0	cM
363	Block6201	0	cM
364	Block6307	0	cM
365	Block6358	0.578	cM
366	Block5873	0	cM
367	Block5889	0	cM
368	Block6029	0	cM
369	Block6102	0	cM
370	Block6104	0.578	cM
371	Block5806	0	cM
372	Block5807	0.335	cM
373	VrCS49-1	1.136	cM
374	Block5796	0	cM
375	Block5802	0.578	cM
376	Block5519	0	cM
377	Block5524	0	cM
378	Block5531	0	cM
379	Block5534	0	cM
380	Block5581	0	cM
381	Block5717	0	cM
382	Block5718	0	cM
383	Block5719	0	cM
384	Block5721	0	cM
385	Block5722	0	cM
386	Block5734	0	cM
387	Block5737	0	cM
388	Block5748	0.578	cM
389	Block5257	0	cM
390	Block5261	0	cM
391	Block5262	0	cM
392	Block5264	0	cM
393	Block5265	0	cM
394	Block5267	0	cM
395	Block5276	0	cM
396	Block5278	0	cM
397	Block5286	0	cM
398	Block5335	0	cM
399	Block5343	0	cM
400	Block5347	0	cM
401	Block5352	0	cM
402	Block5354	0	cM
403	Block5421	0	cM
404	Block5486	0	cM
405	Block5487	0	cM
406	Block5505	0	cM
407	Block5516	0	cM
408	Block5517	0	cM
409	Block5518	0.578	cM
410	Block5254	0.578	cM
411	Block5243	1.17	cM
412	Block5233	1.471	cM
413	Block5153	0	cM
414	Block5231	0.911	cM
415	vr3-1202	1.8	cM
416	vr3-809	1.4	cM
417	vr3-791	3.6	cM
418	vr3-303	3.671	cM
419	Block5154	0	cM
420	Block5220	0	cM
421	Block5222	0.229	cM
422	VrCs207	3.4	cM
423	vr2-401	2.2	cM
424	mgQ62-2	15.1	cM
425	vr1-1095	39.5	cM
426	vr2-345		cM
	chromosome LG2
427	VrCs209	0	cM
428	GMES3599	0	cM
429	Mchr11-45	0	cM
430	Block9843	0	cM
431	Block9844	0	cM
432	vr2-1875	0	cM
433	ID2-1	0.287	cM
434	Block10229	0	cM
435	Block10322	0.873	cM
436	Block10349	0	cM
437	Block10357	0	cM
438	Block10363	0.64	cM
439	Mchr11-47	0.047	cM
440	Block10365	0.229	cM
441	Block10366	0.024	cM
442	GMES1802	0.604	cM
443	Block10369	0.596	cM
444	CEDG293	0	cM
445	CEDG285	0.263	cM
446	Block10375	0.137	cM
447	Mchr11-50	0.4	cM
448	cp01354	0.322	cM
449	Block10378	0.078	cM
450	cp03853	0.379	cM
451	Block10383	0.221	cM
452	C251	0.236	cM
453	Block10382	0.964	cM
454	CEDG198	0.129	cM
455	Block10380	0.571	cM
456	Block10384	0.4	cM
457	GMES1860	0.23	cM
458	Block10386	0.97	cM
459	CEDG168b	0.409	cM
460	Block10387	0.091	cM
461	VrCS282-2	0	cM
462	GMESO990a	2.4	cM
463	CEDG136	0.258	cM
464	Block10389	1.378	cM
465	Block10391	0.164	cM
466	Mchr11-34	0.924	cM
467	Block10395	0.276	cM
468	CEDG006	0.8	cM
469	CEDG284	0.24	cM
470	Block10397	0.06	cM
471	Mchr11-39	0.5	cM
472	CEDA2AG001	0.5	cM
473	GMES5341	0.4	cM
474	CEDG297	0	cM
475	GMES0214a	0	cM
476	GMES5823	0.205	cM
477	Block10401	1.095	cM
478	ID2-2	0.278	cM
479	Block10399	0.022	cM
480	GMES2994	1	cM
481	HAAS_VR_1812	0.994	cM
482	Block10402	0.006	cM
483	HAAS_VR_295	2.079	cM
484	Block10560	0.921	cM
485	Mchr11-27	0.03	cM
486	ID2-7	0.137	cM
487	Block10629	0.603	cM
488	ID2-3	0.254	cM
489	Block10832	0.476	cM
490	ID2-4	0	cM
491	ID2-5	0	cM
492	ID2-6	0.152	cM
493	Block10831	0.648	cM
494	VrCS23-2	0	cM
495	P1-53	0.038	cM
496	Block10822	0.262	cM
497	P1-65	0.195	cM
498	Block10836	0.458	cM
499	Block10835	0.107	cM
500	ID2-8	0.14	cM
501	HAAS_VR_1666	0.1	cM
502	P1-808	0.11	cM
503	Block10824	0.571	cM
504	Block10737	0.319	cM
505	CEDG050	0.25	cM
506	ID2-9	0.05	cM
507	GMES1611	0	cM
508	GMES1737a	0	cM
509	GMES1033	0.011	cM
510	Block10833	0.859	cM
511	Block10826	0.03	cM
512	P1-546	0.427	cM
513	Block10837	1.502	cM
514	Block10889	0.071	cM
515	Mchr11-21	0.5	cM
516	C118	0.059	cM
517	Block10927	1.141	cM
518	MUS869	0.1	cM
519	C147	0.5	cM
520	C145	0.359	cM
521	Block10928	0.041	cM
522	CEDG153	0.2	cM
523	B53	0.1	cM
524	MUS171	0.1	cM
525	GMES0711	0.4	cM
526	GMES4236	0.252	cM
527	Block10929	0.248	cM
528	CEDG244	0	cM
529	X87	0.2	cM
530	H32	0.9	cM
531	VrCS215-1	0.1	cM
532	cp00680	0.053	cM
533	Block10936	0.347	cM
534	GMES0990b	0.283	cM
535	Block10937	0.343	cM
536	Block10940	0.174	cM
537	VrCs215-1	0.456	cM
538	Block10941	0.044	cM
539	CEDG225	0.4	cM
540	cp02662	0.1	cM
541	p3-606	0.086	cM
542	Block10942	0.343	cM
543	Block10944	0.171	cM
544	P3-714	0.1	cM
545	cp03715	0.2	cM
546	MUS617	0.3	cM
547	p3-328	0.7	cM
548	P1-406	0.328	cM
549	Block10945	0.572	cM
550	P1-816	0.23	cM
551	Block10948	0.27	cM
552	GMES5463	0.187	cM
553	Block10946	0.413	cM
554	P1-622	0.159	cM
555	Block10950	0.441	cM
556	GMES3108a	0.6	cM
557	X74	0.231	cM
558	Block10949	0.4	cM
559	Block10952	0.069	cM
560	cp11025	0.2	cM
561	Mchr11-13	0.247	cM
562	Block10956	0.228	cM
563	Block10991	0.574	cM
564	Block10992	0	cM
565	Block11051	0.451	cM
566	pM241	0.064	cM
567	Block11056	0	cM
568	Block11057	0	cM
569	Block11058	0.288	cM
570	Block11060	0.448	cM
571	P1-66	0	cM
572	P1-54	0	cM
573	X84	0	cM
574	P1-120	0	cM
575	P1-867	0	cM
576	P1-684	0	cM
577	P2-124	1.5	cM
578	P1-1256	0.449	cM
579	Block11061	0.051	cM
580	p3-476	0.3	cM
581	p3-477	0.227	cM
582	Block11063	0.273	cM
583	P1-642	0.7	cM
584	p-587	0.2	cM
585	Mchr11-9	0.298	cM
586	Block11073	0.287	cM
587	Block11070	0.115	cM
588	P1-550	0.173	cM
589	Block11074	0	cM
590	Block11075	0.287	cM
591	Block11076	0.14	cM
592	CEDG096a	0	cM
593	Vr3-107	0.438	cM
594	Block11077	0	cM
595	Block11081	0	cM
596	Block11082	0.162	cM
597	GMES0216b	0.125	cM
598	Block11083	0.693	cM
599	Block11085	0.082	cM
600	P1-738	0.2	cM
601	MUS411	0.005	cM
602	Block11087	0.495	cM
603	P1-737	0.2	cM
604	GMES0708	0	cM
605	cp00228a	0.1	cM
606	p3-599	0	cM
607	GMES1303	0	cM
608	GMES0856C	0	cM
609	GMES3316b	0	cM
610	cp08299	0	cM
611	MBSSR015b	0.077	cM
612	Block11089	0	cM
613	Block11097	0.323	cM
614	p3-598	1.2	cM
615	P1-464	0.1	cM
616	MUS576	0.153	cM
617	Block11099	0.647	cM
618	GMES1156a	0.225	cM
619	Block11101	0.275	cM
620	P1-412	0.4	cM
621	GMES0477	1	cM
622	H25	0.41	cM
623	Block11102	0.287	cM
624	Block11109	0.403	cM
625	vr3-1169	0.175	cM
626	Block11121	0	cM
627	Block11122	0.288	cM
628	Block11125	0	cM
629	Block11126	0	cM
630	Block11128	0	cM
631	Block11131	0	cM
632	Block11132	0.114	cM
633	Block11249	0	cM
634	Block11289	0.287	cM
635	Block11288	0.036	cM
636	C14-1	0.252	cM
637	Block11284	0.578	cM
638	Block11290	0.287	cM
639	Block11291	0	cM
640	Block11293	0.578	cM
641	Block11294	0	cM
642	Block11295	0	cM
643	Block11300	0	cM
644	Block11302	0	cM
645	Block11303	0.305	cM
646	C18	1.1	cM
647	C14-2	0.4	cM
648	Mchr11-2	0.6	cM
649	X90	0.744	cM
650	Block11297	0	cM
651	Block12265	0.256	cM
652	VrCS225	0.031	cM
653	Block11299	0.115	cM
654	Block12257	0	cM
655	Block12259	0	cM
656	Block12260	0	cM
657	Block12261	0	cM
658	Block12262	0	cM
659	Block12264	0	cM
660	Block12266	0	cM
661	Block12267	0	cM
662	Block12269	0	cM
663	Block12273	0	cM
664	Block12416	0	cM
665	Block12417	0.635	cM
666	Block12256	0.119	cM
667	Lob	0	cM
668	VrCS359	0.8	cM
669	vr2-2115	0.251	cM
670	Block11543	0	cM
671	Block11568	0	cM
672	Block12271	0	cM
673	Block12286	0.114	cM
674	Block11532	0	cM
675	Block11716	0	cM
676	Block11913	0.114	cM
677	Block11464	0.021	cM
678	P1-1412	0.267	cM
679	Block11389	0	cM
680	Block11397	0	cM
681	Block11405	0	cM
682	Block11407	0	cM
683	Block11414	0	cM
684	Block11425	0	cM
685	Block11449	0	cM
686	Block11456	0	cM
687	Block11498	0	cM
688	Block11510	0	cM
689	Block11523	0	cM
690	Block11531	0	cM
691	Block11997	0	cM
692	Block12242	0	cM
693	Block12243	0	cM
694	Block12246	0	cM
695	Block12247	0	cM
696	Block12248	0	cM
697	Block12249	0	cM
698	Block12251	0	cM
699	Block12252	0	cM
700	Block12253	0	cM
701	Block15158	0	cM
702	Block15247	0	cM
703	Block15270	0	cM
704	Block15299	0	cM
705	Block15300	0	cM
706	Block15301	0	cM
707	Block15304	0	cM
708	Block15305	0	cM
709	Block15308	0	cM
710	Block15309	0	cM
711	Block15360	0	cM
712	Block15374	0	cM
713	Block15375	0	cM
714	Block15392	0	cM
715	Block15402	0	cM
716	Block15418	0.578	cM
717	Block11316	0	cM
718	Block11328	0.155	cM
719	P1-690	0.246	cM
720	Block13047	0	cM
721	Block15148	0	cM
722	Block15149	0.288	cM
723	Block13045	0.287	cM
724	Block12955	0.179	cM
725	P2-443	0.108	cM
726	Block13038	0	cM
727	Block13291	0.288	cM
728	Block13780	0.171	cM
729	Block13962	0	cM
730	Block14037	0	cM
731	Block14266	0	cM
732	Block14483	0	cM
733	Block14600	0.288	cM
734	Block14078	0	cM
735	Block14351	0	cM
736	Block14683	0	cM
737	Block14778	0	cM
738	Block14798	0	cM
739	Block14890	0	cM
740	Block14921	0	cM
741	Block15064	0.145	cM
742	vr2-637	0.026	cM
743	Block14801	0	cM
744	Block15925	0	cM
745	Block16198	0	cM
746	Block16219	0	cM
747	Block16277	0.287	cM
748	Block15449	0	cM
749	Block15713	0	cM
750	Block15716	0	cM
751	Block15755	0	cM
752	Block15809	0	cM
753	Block15824	0	cM
754	Block15920	0	cM
755	Block15922	0	cM
756	Block16127	0.187	cM
757	VrCS369	0.101	cM
758	Block15443	0	cM
759	Block15444	0	cM
760	Block15445	0	cM
761	Block15490	0	cM
762	Block15491	0	cM
763	Block15500	0	cM
764	Block15501	0	cM
765	Block16506	0	cM
766	Block16602	0	cM
767	Block16628	0	cM
768	Block16631	0.399	cM
769	P2-461	2.3	cM
770	vr3-194	0.1	cM
771	P2-657	0	cM
772	CEDG026a	0.3	cM
773	CEDG210	1.1	cM
774	P2-431	1	cM
775	LpCS304	0.1	cM
776	vr2-510	0.8	cM
777	CEDG275	0.8	cM
778	GMES3306b	0.1	cM
779	vr2-1268	0.4	cM
780	GMES0162b	0.8	cM
781	CEDC050	0.8	cM
782	cp04111	0.4	cM
783	CEDAAG002	1.2	cM
784	GMES4137	3.2	cM
785	vr1-1087	0.2	cM
786	VrCs225	6.6	cM
787	GMES0211b	0.8	cM
788	vr2-1419	4.8	cM
789	vr1-1457	13	cM
790	vr3-115	13.5	cM
791	vr3-327	13.5	cM
792	vr3-73	8.1	cM
793	vr3-88	3.2	cM
794	vr3-30	17.8	cM
795	vr3-837	25.5	cM
796	vr2-440	53.9	cM
797	vr1-1509		cM
	chromosome LG3
798	cgO26	0	cM
799	CEDAAG001	0	cM
800	GMES0405	0	cM
801	GMES6583	0	cM
802	GMES1086b	0	cM
803	GMES0294a	0	cM
804	CEDG186a	0	cM
805	GMES5231	0	cM
806	GMES0208	0	cM
807	GMES2040	0	cM
808	GMES6175	0	cM
809	GMES3108b	0	cM
810	GMES0984	0	cM
811	GMES5634	0	cM
812	GMES2063b	0	cM
813	GMES0214b	0	cM
814	GMES3105	0	cM
815	cp04320	0	cM
816	MBSSR063	0	cM
817	GMES3101a	0	cM
818	cp02181	0	cM
819	cp05446	0	cM
820	GMES0861a	0	cM
821	GMES1556a	0	cM
822	cp10211	0	cM
823	BM146	0	cM
824	cp04700	0	cM
825	GMES0473	0	cM
826	GMES2871b	0	cM
827	CEDG305	0	cM
828	Block16942	0	cM
829	vr1-1184	0	cM
830	H20	0	cM
831	ID3-1	0.4	cM
832	Block16950	0.286	cM
833	Block16926	0	cM
834	Block16943	0.514	cM
835	pO26	0.1	cM
836	CEDG176a	0.4	cM
837	GMES0963	0.2	cM
838	CEDG010	0.2	cM
839	GMES2871a	0.099	cM
840	Block16955	0.101	cM
841	C268	0.472	cM
842	Block16958	0.028	cM
843	CEDG117	0	cM
844	X174	0.1	cM
845	HAAS_VR_1571	0.157	cM
846	Block16959	0.516	cM
847	Block16960	0.027	cM
848	X180	0.1	cM
849	cp03846	0.44	cM
850	ID3-2	0.178	cM
851	Block16961	0.562	cM
852	ID3-3	0.009	cM
853	Block16962	0.111	cM
854	cp00361	0	cM
855	C260	0.4	cM
856	GMES3107	0.291	cM
857	Block16963	0.572	cM
858	Block16964	0.237	cM
859	Mchr6-50	0.163	cM
860	Block16981	0.4	cM
861	Block16982	0.237	cM
862	HAAS_VR_2232	0.3	cM
863	P2-683	0.498	cM
864	Block16984	0.702	cM
865	DMBSSR035	0.399	cM
866	Block16985	0.201	cM
867	ID3-4	0.315	cM
868	Block16986	0.485	cM
869	P1-232	0.3	cM
870	CEDG043	0.316	cM
871	Block16988	0.285	cM
872	Block16989	0	cM
873	Block16990	0.799	cM
874	CEDG296	0	cM
875	P1-702	0.958	cM
876	Block17243	0	cM
877	Block17411	0.288	cM
878	Block17347	0	cM
879	Block17348	0	cM
880	Block17350	0.014	cM
881	ID3-5	0.273	cM
882	Block17501	0.402	cM
883	Block17468	0	cM
884	Block17486	0	cM
885	Block17496	0	cM
886	Block17497	0.665	cM
887	cp02271b	0.1	cM
888	P1-2400	0.393	cM
889	Block17944	0.744	cM
890	Block18072	0.063	cM
891	P2-1342	0.109	cM
892	Block18073	0.344	cM
893	Block18074	0.747	cM
894	P2-1356	0.594	cM
895	Block18366	0	cM
896	Block18416	0	cM
897	Block18437	0	cM
898	Block18438	0.288	cM
899	Block18439	0.018	cM
900	Mchr6-46	0.269	cM
901	Block18441	0.031	cM
902	P1-2034	0.257	cM
903	Block18442	0.287	cM
904	Block18450	0	cM
905	Block18466	0	cM
906	Block18467	0	cM
907	Block18470	0	cM
908	Block18474	0.156	cM
909	VrCS49-2	0.2	cM
910	P2-1789	0.8	cM
911	P2-1851	0.1	cM
912	HAAS_VR_1830	0.028	cM
913	Block18565	0.572	cM
914	P2-1570	0.173	cM
915	Block18673	0.127	cM
916	pM78	0.158	cM
917	Block18567	0.807	cM
918	Block18747	0.035	cM
919	P1-2041	0.538	cM
920	Block18748	0.162	cM
921	p3-353	0.183	cM
922	Block19028	0.458	cM
923	Block19138	0.159	cM
924	ID3-6	0.129	cM
925	Block19217	0.071	cM
926	P1-1828	0.1	cM
927	Mchr6-42	0.407	cM
928	Block19219	0.093	cM
929	P1-2206	0.421	cM
930	Block19223	0.172	cM
931	Block19224	0.107	cM
932	P1-2355	0.3	cM
933	MUS298	0.107	cM
934	Block19246	0.293	cM
935	HAAS_VR_947	0	cM
936	P1-2370	0.4	cM
937	P1-2323	0.051	cM
938	Block19248	0.349	cM
939	VrCs321	0.1	cM
940	P1-496	0.41	cM
941	Block19251	0.59	cM
942	Mchr6-35	0	cM
943	P1-165	0.8	cM
944	P1-1486	0.82	cM
945	ID3-7	0.005	cM
946	Block19258	0.275	cM
947	P2-1382	0.011	cM
948	Block19260	0.989	cM
949	P2-1355	0.2	cM
950	ID3-8	0.184	cM
951	Block19265	0.216	cM
952	P2-1682	0.34	cM
953	ID3-9	0.302	cM
954	Block19263	0.258	cM
955	vr2-1366	0	cM
956	P2-1611	0.7	cM
957	P2-1635	0.9	cM
958	P1-2018	0.757	cM
959	Block19620	0.243	cM
960	P1-2015	0.045	cM
961	Block19671	0	cM
962	Block20285	0.171	cM
963	Block19653	0.4	cM
964	Block20091	0.172	cM
965	Block19663	0	cM
966	Block19916	0	cM
967	Block20081	0.287	cM
968	Block20330	0	cM
969	Block20331	0.125	cM
970	P1-2053	0.448	cM
971	Block20332	0.252	cM
972	HAAS_VR_948	0.2	cM
973	VrCS215-3	0.469	cM
974	Block20340	0.287	cM
975	Block20341	0.144	cM
976	P2-1895	0.43	cM
977	Block20344	0.287	cM
978	Block20346	0	cM
979	Block20367	0.287	cM
980	Block20379	0.229	cM
981	Block20394	0.167	cM
982	P2-1908	0.582	cM
983	Block20458	0.118	cM
984	P3-1406	0.17	cM
985	Block20590	0	cM
986	Block20591	0.872	cM
987	Block20594	0.287	cM
988	Block20595	0.271	cM
989	C180	0.307	cM
990	Block20598	0.115	cM
991	Block20638	0	cM
992	Block20639	0.278	cM
993	vr1-991	0.009	cM
994	Block20684	0	cM
995	Block20704	0	cM
996	Block20705	0.091	cM
997	P3-1440	0.023	cM
998	Block20663	0	cM
999	Block20678	0.777	cM
1000	MGCP15445	0.03	cM
1001	Block20725	0.67	cM
1002	p3-617	0.074	cM
1003	Block20728	0.288	cM
1004	Block20729	0	cM
1005	Block20807	0.687	cM
1006	Block20731	0	cM
1007	Block20732	0.051	cM
1008	P1-961	1.1	cM
1009	P1-1883	1	cM
1010	MUS698	1.1	cM
1011	VrCS282-2	1.8	cM
1012	VrCS209	1.3	cM
1013	P1-389	0.7	cM
1014	p3-627	2.7	cM
1015	C119	0.7	cM
1016	MUS236	3.1	cM
1017	P1-2383	0.9	cM
1018	Mchr6-25	0.4	cM
1019	Mchr6-33	1.3	cM
1020	P1-2076	2.1	cM
1021	P1-2418	0.5	cM
1022	MUS700	0.8	cM
1023	P1-2399	0.7	cM
1024	X126	2.7	cM
1025	P2-1828	3.8	cM
1026	HAAS_VR_998	0.8	cM
1027	P2-1344	0.2	cM
1028	vr2-1611	0.5	cM
1029	P2-1460	1.4	cM
1030	P1-2263	0.6	cM
1031	Mchr6-11	0.5	cM
1032	P1-1651	0.7	cM
1033	vr2-1265	2.3	cM
1034	vr2-1852	3.4	cM
1035	HAAS_VR_2089	0.6	cM
1036	VR0169	1.6	cM
1037	GMES5091	1.3	cM
1038	Mchr6-8	3.6	cM
1039	Mchr6-6	4	cM
1040	vr2-1588	9.4	cM
1041	HAAS_VR_943	1.9	cM
1042	Mchr1-1		cM
	chromosome LG4
1043	VrCs370	0	cM
1044	CEDG139	0	cM
1045	GMES3392	0	cM
1046	Block22860	0	cM
1047	Block22861	0	cM
1048	Block22864	0	cM
1049	Block22866	0	cM
1050	Block22868	0	cM
1051	Block22870	0	cM
1052	Block22871	0	cM
1053	Block22872	0	cM
1054	p3-679	0	cM
1055	ID4-5	0.287	cM
1056	Block22859	0.288	cM
1057	Block22858	0.287	cM
1058	Block22855	0.248	cM
1059	ID4-4	0.33	cM
1060	Block22851	0.66	cM
1061	GMES5262	0.327	cM
1062	Block22590	0.287	cM
1063	Block22589	0.286	cM
1064	GMES1135	0	cM
1065	GMES1820	0	cM
1066	MBSSR179	0.001	cM
1067	Block21222	0.578	cM
1068	Block21232	0	cM
1069	Block21234	1.834	cM
1070	Block21215	0.171	cM
1071	Block21211	0.344	cM
1072	Block21075	0.172	cM
1073	Block21047	0.28	cM
1074	ID4-1	0.007	cM
1075	Block20905	0	cM
1076	Block20906	0	cM
1077	Block20909	0	cM
1078	Block20910	0	cM
1079	Block20911	0	cM
1080	Block20912	0	cM
1081	Block20915	0	cM
1082	Block20916	0	cM
1083	Block20917	0	cM
1084	Block20918	0	cM
1085	Block20919	0	cM
1086	Block20923	0	cM
1087	Block20925	0	cM
1088	Block20926	0	cM
1089	Block20931	0	cM
1090	Block20935	0	cM
1091	Block20947	1.17	cM
1092	Block20808	0	cM
1093	Block20845	0	cM
1094	Block20846	1.133	cM
1095	ID4-3	1.11	cM
1096	ID4-2	0.471	cM
1097	Block23087	0	cM
1098	Block23099	0.287	cM
1099	Block23113	0	cM
1100	Block23114	0	cM
1101	Block23115	0	cM
1102	Block23116	0	cM
1103	Block23117	0	cM
1104	Block23122	0	cM
1105	Block23213	0	cM
1106	Block23240	0	cM
1107	Block23241	0	cM
1108	Block23242	0.578	cM
1109	Block23086	0.578	cM
1110	Block22972	0	cM
1111	Block22973	0	cM
1112	Block22974	0	cM
1113	Block22975	0	cM
1114	Block22976	0	cM
1115	Block22979	0	cM
1116	Block23077	0	cM
1117	Block23080	0	cM
1118	Block23081	0	cM
1119	Block23083	0.287	cM
1120	Block22962	0	cM
1121	Block23084	0.899	cM
1122	GMES0162a	0.8	cM
1123	VrCS60	0	cM
1124	P1-755	0	cM
1125	p3-581	0	cM
1126	C-889	0.4	cM
1127	p3-569	0.6	cM
1128	cp00416	0.335	cM
1129	Block23558	0	cM
1130	Block23559	0.365	cM
1131	p3-436	0.213	cM
1132	Block23647	0.288	cM
1133	Block23707	0.999	cM
1134	VrCS370	1.4	cM
1135	P1-899	1.8	cM
1136	GMES1156b	0	cM
1137	CEDG185	0.16	cM
1138	Block23715	0.44	cM
1139	P3-851	0	cM
1140	p3-1244	0	cM
1141	P1-64-1	0	cM
1142	L77	0	cM
1143	X139	0	cM
1144	H44	0.138	cM
1145	Block23716	0.362	cM
1146	CEDG086	0.3	cM
1147	X154	0.6	cM
1148	GMES6217	0	cM
1149	GMES6859	0	cM
1150	MBSSR095b	0	cM
1151	MBSSR033	0.209	cM
1152	Block23717	0	cM
1153	Block23718	0.691	cM
1154	C115	0.1	cM
1155	GMES0709a	0	cM
1156	CEDG077	0.4	cM
1157	CEDG154	0.8	cM
1158	Cp08267	0	cM
1159	CEDG088	0.3	cM
1160	VrCS215-2	0.6	cM
1161	VrCS123	0.3	cM
1162	CEDG091	0.5	cM
1163	GMES6901	0.33	cM
1164	Block23733	0.07	cM
1165	X143	0	cM
1166	P1-746	0	cM
1167	P1-395	0	cM
1168	P1-900	0	cM
1169	P1-895	0	cM
1170	P1-879	0	cM
1171	P1-50	0	cM
1172	P1-1433	0.4	cM
1173	MBSSR130	0.8	cM
1174	VrCs123	0	cM
1175	CEDC033	0.506	cM
1176	Block23923	0.287	cM
1177	Block23981	0.007	cM
1178	P1-1853	0.54	cM
1179	ID4-6	0.56	cM
1180	MGCP22067	0.7	cM
1181	MGCP9309	0	cM
1182	MGCP25337	0	cM
1183	P1-2080	0	cM
1184	P1-2085	0.278	cM
1185	Block23994	0.578	cM
1186	Block23996	0.644	cM
1187	MGCP2946	0.5	cM
1188	P1-2059	0.94	cM
1189	Block24007	0.288	cM
1190	Block24008	0	cM
1191	Block24060	0	cM
1192	Block24092	0	cM
1193	Block24100	0.572	cM
1194	P1-2234	0.1	cM
1195	CEDC058a	0.497	cM
1196	Block24118	0.043	cM
1197	ID4-7	0.36	cM
1198	CEDG096b	0.4	cM
1199	P1-2388	0.9	cM
1200	P1-1569	0.382	cM
1201	Block24160	0	cM
1202	Block24217	0.568	cM
1203	ID4-8	0.01	cM
1204	Block24237	0	cM
1205	Block24243	0	cM
1206	Block24260	0.34	cM
1207	GMES4084	0.004	cM
1208	Block24406	0.396	cM
1209	GMES1124	0	cM
1210	GMES0035	0.1	cM
1211	P1-2398	0	cM
1212	P2-1808	0	cM
1213	C78	0.082	cM
1214	Block24428	0.288	cM
1215	Block24454	0	cM
1216	Block24455	0	cM
1217	Block24456	0	cM
1218	Block24655	0.287	cM
1219	Block24457	0	cM
1220	Block24459	0	cM
1221	Block24832	0.443	cM
1222	CEDG107	0.9	cM
1223	B40	1.1	cM
1224	P3-1376	0	cM
1225	C153	0	cM
1226	P1-1562	0	cM
1227	P2-1530	0	cM
1228	MGCP28273	0	cM
1229	P2-1907	0	cM
1230	MGCP20202	0	cM
1231	MGCP25337-2	0	cM
1232	P2-1770	0	cM
1233	MGCP24431	0	cM
1234	X189	0	cM
1235	H11	0	cM
1236	P3-1461	0	cM
1237	P3-1484	0	cM
1238	P1-2011	0	cM
1239	P1-2351	0	cM
1240	P1-2205	0	cM
1241	P1-2463	0	cM
1242	J5-1	0	cM
1243	B70	0	cM
1244	P1-1996	0	cM
1245	P2-1504	0	cM
1246	P2-1611	0	cM
1247	P2-114	0	cM
1248	P2-99	0	cM
1249	MGCP18997	0	cM
1250	P1-1885	0.18	cM
1251	ID4-9	0.92	cM
1252	P1-2201	0.6	cM
1253	VrCS297	0.34	cM
1254	ID4-10	0.66	cM
1255	X155	0.2	cM
1256	CEDG103	0.5	cM
1257	GMES1078	0.7	cM
1258	P1-1078	0.1	cM
1259	GMES5911	1.2	cM
1260	p1-721	0.6	cM
1261	p3-390	0.2	cM
1262	p3-625	1.4	cM
1263	P1-1473	1.5	cM
1264	P2-206	2.5	cM
1265	P1-331	1.4	cM
1266	P1-800	0.58	cM
1267	ID4-11	1.02	cM
1268	L21	0.9	cM
1269	C342	1	cM
1270	GMES0216a	0.2	cM
1271	C186	0.6	cM
1272	pQ117	0	cM
1273	LpCS291	8.5	cM
1274	LpCS291	0.9	cM
1275	Mchr2-44	4.7	cM
1276	GMES1216a	0	cM
1277	LFSOy3	2	cM
1278	GMES0247	0	cM
1279	GMES2033	0	cM
1280	CEDC058b	0	cM
1281	GMES3316a	0	cM
1282	MBSSR015a	0	cM
1283	cp00674	0	cM
1284	Mchr3-76	0	cM
1285	HAAS_VR_1437	0	cM
1286	Mchr3-71	0	cM
1287	Mchr3-64	0	cM
1288	Mchr3-53	0	cM
1289	HAAS_VR_1940	0	cM
1290	MUS234	0	cM
1291	MUS490	0	cM
1292	Mchr3-48	0	cM
1293	HAAS_VR_145	0	cM
1294	Mchr3-42	0	cM
1295	Mchr3-36	0	cM
1296	HAAS_VR_621	0	cM
1297	Mchr3-28	0	cM
1298	Mchr3-9	0	cM
1299	MUS471	0	cM
1300	Mchr3-1	0	cM
1301	Mchr3-19	0	cM
1302	Mchr3-34	0	cM
1303	HAAS_VR_2240	0	cM
1304	MUS36	0	cM
1305	VR0338	0	cM
1306	DMB-SSR199	0	cM
1307	Mchr4-99	0	cM
1308	Mchr4-95	0	cM
1309	Mchr4-90	0	cM
1310	Mchr4-32	0	cM
1311	DMB-SSR125	0	cM
1312	Mchr4-82	0	cM
1313	Mchr4-79	0	cM
1314	Mchr4-81	0	cM
1315	Mchr4-71	0	cM
1316	Mchr4-73	0	cM
1317	Mchr4-74	0	cM
1318	Mchr4-40	0	cM
1319	MUS141	0	cM
1320	Mchr4-14	0	cM
1321	MUS575	0	cM
1322	Mchr8-10	0	cM
1323	Mchr4-7	0	cM
1324	Mchr4-6	0	cM
1325	HAAS_VR_2311	0	cM
1326	Mchr4-117	0	cM
1327	Mchr4-119	0	cM
1328	Mchr4-116	0	cM
1329	Mchr4-111	0	cM
1330	Mchr4-108	9	cM
1331	CEDG127	0.9	cM
1332	VrCS215-4	0.7	cM
1333	Mchr4-136	1.3	cM
1334	Mchr4-132	0.6	cM
1335	Mchr4-131	0.6	cM
1336	CEDG074a	0.6	cM
1337	Mchr4-127	1	cM
1338	HAAS_VR_1976	0.7	cM
1339	Mchr4-144	1.5	cM
1340	Mchr4-141	2.6	cM
1341	Mchr4-156	0.4	cM
1342	Mchr4-157	1.1	cM
1343	VR084	1	cM
1344	MUS371	0.6	cM
1345	Mchr4-165	0.2	cM
1346	Mchr4-164	1.1	cM
1347	MUS303	2.7	cM
1348	Mchr4-178	0.9	cM
1349	MUS25	1.2	cM
1350	Mchr4-179	2.8	cM
1351	Mchr4-184	5	cM
1352	HAAS_VR_84	2.4	cM
1353	Mchr4-199	2.3	cM
1354	P1-64-2	1.2	cM
1355	P1-52	98.8	cM
1356	Mchr4-195	0.8	cM
1357	HAAS_VR_812	2.7	cM
1358	HAAS_VR_1950	6.6	cM
1359	Young-stem-color		cM
	chromosome LG5
1360	LpCS307	0	cM
1361	GMES4255	0	cM
1362	HAAS_VR_1392	0	cM
1363	Block24837	0	cM
1364	ID5-1	1.3	cM
1365	p3-330	1.5	cM
1366	P3-723	0.234	cM
1367	Block24840	0	cM
1368	Block24881	0	cM
1369	Block24882	0	cM
1370	Block24883	0.166	cM
1371	p3-135	0.412	cM
1372	Block24841	0	cM
1373	Block24843	0	cM
1374	Block24848	0	cM
1375	Block24877	0	cM
1376	Block24878	0.088	cM
1377	C-1564	0.199	cM
1378	Block24868	0	cM
1379	Block24892	0.288	cM
1380	Block24897	0.113	cM
1381	P2-135	0.465	cM
1382	Block24898	0.287	cM
1383	Block24899	0.748	cM
1384	P1-708	0.723	cM
1385	Block24901	0	cM
1386	Block24903	0.377	cM
1387	Mchr4-45	1.1	cM
1388	GMES6462	0	cM
1389	CEDG020	0.299	cM
1390	Block24906	0	cM
1391	Block24909	0.101	cM
1392	GMES2063a	0	cM
1393	GMES2485	1.675	cM
1394	Block24908	0.025	cM
1395	Mchr4-50	0.847	cM
1396	Block24910	0.473	cM
1397	ID5-2	0.18	cM
1398	MBSSR039	0	cM
1399	MBSSR041	0	cM
1400	DMBSSR024b	0	cM
1401	GMES3213b	0	cM
1402	GMES0037	0	cM
1403	Mchr4-52	1.2	cM
1404	Mchr4-56	0.4	cM
1405	CEDG060	0	cM
1406	Mchr4-58	0.4	cM
1407	GMES3515	1.2	cM
1408	VrCS164	0.4	cM
1409	CEDG184	0.4	cM
1410	cp01953	0.6	cM
1411	Mchr4-61	0.4	cM
1412	VrCS84-1	0.3	cM
1413	CEDG067	0.8	cM
1414	GMES2450	0.487	cM
1415	Block24913	0	cM
1416	Block24923	0	cM
1417	Block24924	0.287	cM
1418	Block24920	0	cM
1419	Block24922	0.226	cM
1420	p3-223	0.1	cM
1421	Mchr4-60	0.1	cM
1422	CEDG264	0.152	cM
1423	Block25003	0	cM
1424	Block25057	0.248	cM
1425	p2-52	0.04	cM
1426	Block24925	0	cM
1427	Block24932	0.287	cM
1428	Block24931	0	cM
1429	Block25120	0	cM
1430	Block25138	0	cM
1431	Block25212	0	cM
1432	Block25216	0	cM
1433	Block25231	0	cM
1434	Block25271	0	cM
1435	Block25293	0	cM
1436	Block25336	0.287	cM
1437	Block25105	0	cM
1438	Block25369	0	cM
1439	Block25372	0	cM
1440	Block25374	0	cM
1441	Block25375	0	cM
1442	Block25376	0	cM
1443	Block25377	0	cM
1444	Block25378	0	cM
1445	Block25381	0	cM
1446	Block25385	0	cM
1447	Block25386	0	cM
1448	Block25403	0	cM
1449	Block25423	0	cM
1450	Block25477	0	cM
1451	Block25478	0	cM
1452	Block25479	0.086	cM
1453	Mchr4-64	0.3	cM
1454	ID5-3	1.5	cM
1455	p3-677	0.4	cM
1456	BM170	0.4	cM
1457	Mchr4-67	0.1	cM
1458	p2-658	0.902	cM
1459	Block25367	0	cM
1460	Block25808	0	cM
1461	Block25826	0	cM
1462	Block25846	0	cM
1463	Block25868	0.058	cM
1464	ID5-4	0.04	cM
1465	P3-1000	0.48	cM
1466	Block25887	0	cM
1467	Block26797	0	cM
1468	Block26798	0	cM
1469	Block26799	0	cM
1470	Block26802	0	cM
1471	Block26804	0	cM
1472	Block26806	0	cM
1473	Block26817	0	cM
1474	Block26818	0	cM
1475	Block26841	0	cM
1476	Block26844	0	cM
1477	Block26868	0	cM
1478	Block26869	0	cM
1479	Block26901	0	cM
1480	Block26905	0	cM
1481	Block26922	0.02	cM
1482	P2-38	0.1	cM
1483	CEDG268	0.167	cM
1484	Block25797	0	cM
1485	Block26941	0.233	cM
1486	P1-186	0.1	cM
1487	CEDG096c	0.246	cM
1488	Block26810	0.054	cM
1489	P1-955	0.5	cM
1490	P1-860	0.2	cM
1491	Mchr4-66	0.4	cM
1492	P2-669	0.1	cM
1493	X124	0.9	cM
1494	CEDG027	0.58	cM
1495	ID5-5	0.22	cM
1496	p3-412	0.1	cM
1497	cp02271a	0.4	cM
1498	MUS511	0	cM
1499	p3-693	0.567	cM
1500	Block26985	0	cM
1501	Block27073	0.033	cM
1502	CEDG253	0.254	cM
1503	Block27072	0	cM
1504	Block27075	0.046	cM
1505	GMES1770a	0.241	cM
1506	Block27071	0.259	cM
1507	p3-459	0.9	cM
1508	P2-534	0.312	cM
1509	Block27074	0.288	cM
1510	P1-161	0.29	cM
1511	Block27129	0.288	cM
1512	Block27130	0	cM
1513	Block27132	0.702	cM
1514	ID5-6	0.12	cM
1515	CEDG236	0.649	cM
1516	Block27133	0.287	cM
1517	Block27211	0	cM
1518	Block27425	0.054	cM
1519	ID5-7	0.233	cM
1520	Block27197	0.077	cM
1521	VrCs53	1.093	cM
1522	Block27153	0.107	cM
1523	CEDG008	0.471	cM
1524	Block27498	0.329	cM
1525	GMES5572	0.249	cM
1526	Block27501	0	cM
1527	Block27533	0.288	cM
1528	Block27502	0	cM
1529	Block27536	0.287	cM
1530	Block27535	0.076	cM
1531	CEDG132	0.1	cM
1532	MUS801	0.111	cM
1533	Block27565	0.578	cM
1534	Block27564	0.579	cM
1535	Block27702	0.287	cM
1536	Block27617	0.345	cM
1537	GMES5773	0.47	cM
1538	ID5-8	0.057	cM
1539	Block27701	0.313	cM
1540	ID5-9	0.265	cM
1541	Block27725	0.288	cM
1542	Block27749	0.407	cM
1543	CEDG2T3001	1.064	cM
1544	Block27753	0.636	cM
1545	LFSOy5	0	cM
1546	CEDG115	0.533	cM
1547	Block27958	0	cM
1548	Block27959	0.288	cM
1549	Block27757	0	cM
1550	Block27956	0.079	cM
1551	MUS128	0.499	cM
1552	Block27801	0	cM
1553	Block28044	0.287	cM
1554	Block27963	0	cM
1555	Block27965	0	cM
1556	Block28047	0.287	cM
1557	Block28045	0	cM
1558	Block28092	0.579	cM
1559	Block28050	0	cM
1560	Block28170	0	cM
1561	Block28196	0.287	cM
1562	Block28097	0	cM
1563	Block28202	0	cM
1564	Block28203	0	cM
1565	Block28204	0	cM
1566	Block28206	0	cM
1567	Block28207	0.578	cM
1568	Block28199	0.578	cM
1569	Block28227	0	cM
1570	Block28240	0.287	cM
1571	Block28228	0	cM
1572	Block28264	0.288	cM
1573	Block28249	0.33	cM
1574	VrCs84-1	0.248	cM
1575	Block28291	0	cM
1576	Block28294	0.287	cM
1577	Block28292	0.578	cM
1578	Block28295	0.288	cM
1579	Block28299	0	cM
1580	Block28301	0	cM
1581	Block28302	0	cM
1582	Block28303	0.287	cM
1583	Block28300	0	cM
1584	Block28308	0	cM
1585	Block28309	0.212	cM
1586	Mchr5-85	0.075	cM
1587	Block28305	0.288	cM
1588	Block28310	0.287	cM
1589	Block28311	0	cM
1590	Block28313	0.287	cM
1591	Block28312	0.288	cM
1592	Block28314	0.275	cM
1593	GMES0337	0	cM
1594	GMES1725	0.012	cM
1595	Block28315	0.287	cM
1596	Block28316	0.231	cM
1597	ID5-10	0.939	cM
1598	Block28317	0	cM
1599	Block28319	0	cM
1600	Block28322	0.731	cM
1601	cp00754	0.19	cM
1602	ID5-11	0.249	cM
1603	Block28318	0.061	cM
1604	CEDG171	0	cM
1605	GMES3101C	0.226	cM
1606	Block28325	0	cM
1607	Block28327	0	cM
1608	Block28329	0.288	cM
1609	Block28326	0.286	cM
1610	GMES6277	0.001	cM
1611	Block28331	0	cM
1612	Block28335	0.287	cM
1613	Block28334	0	cM
1614	Block28339	0	cM
1615	Block28340	0	cM
1616	Block28341	0.288	cM
1617	Block28338	0.324	cM
1618	GMES0338	0.254	cM
1619	Block28342	0	cM
1620	Block28346	0.872	cM
1621	Block28343	0.287	cM
1622	Block28347	0.587	cM
1623	GMES0861b	0.8	cM
1624	Mchr5-78	0.698	cM
1625	Block28359	0	cM
1626	Block28364	0	cM
1627	Block28368	0.702	cM
1628	mc17-3	0.17	cM
1629	Block28362	0	cM
1630	Block28371	0.288	cM
1631	Block28370	0	cM
1632	Block28390	0	cM
1633	Block28392	0	cM
1634	Block28396	0	cM
1635	Block28397	0	cM
1636	Block28399	0	cM
1637	Block28400	0.287	cM
1638	Block28372	0.287	cM
1639	Block28403	0	cM
1640	Block28405	0.578	cM
1641	Block28409	0.31	cM
1642	ID5-12	0.268	cM
1643	Block28412	0.578	cM
1644	Block28413	0.288	cM
1645	Block28417	0	cM
1646	Block28425	0.246	cM
1647	Mchr5-94	0.041	cM
1648	Block28423	0.288	cM
1649	Block28426	0	cM
1650	Block28438	0.287	cM
1651	Block28430	0	cM
1652	Block28432	0.287	cM
1653	Block28440	1.897	cM
1654	MUS726	1.55	cM
1655	ID5-13	9.45	cM
1656	LpCS283	0	cM
1657	mc17.3	0	cM
1658	P1-619	0	cM
1659	P2-554	0	cM
1660	X128	0	cM
1661	X129	0	cM
1662	P1-1890	0	cM
1663	P2-1418	0	cM
1664	P2-1776	0	cM
1665	P2-1611	0	cM
1666	P2-1738	0	cM
1667	MGCP9534	0	cM
1668	MGCP15332	0	cM
1669	C116	0	cM
1670	P1-887	0	cM
1671	P1-1105	0	cM
1672	p1-531	0	cM
1673	P1-382	0	cM
1674	VrCS215-4	2.908	cM
1675	Block28460	0	cM
1676	Block28461	0.578	cM
1677	Block28532	1.776	cM
1678	Block28533	0	cM
1679	Block28534	0.287	cM
1680	Block28538	0.288	cM
1681	Block28536	0	cM
1682	Block28537	0.578	cM
1683	Block28540	2.713	cM
1684	Block28546	2.085	cM
1685	Block28596	0.578	cM
1686	Block28612	6.12	cM
1687	Block28621	0.287	cM
1688	Block28622	0.288	cM
1689	Block28623	0.578	cM
1690	Block28627	0.872	cM
1691	Block28631	0.287	cM
1692	Block28734	0	cM
1693	Block28741	0.288	cM
1694	Block28632	0	cM
1695	Block28633	0	cM
1696	Block28681	0.287	cM
1697	Block28746	0.578	cM
1698	Block28743	0.872	cM
1699	Block28747	0	cM
1700	Block28751	0.287	cM
1701	Block28748	0	cM
1702	Block28754	0	cM
1703	Block28756	0	cM
1704	Block28759	0	cM
1705	Block28760	0.288	cM
1706	Block28753	0.287	cM
1707	Block28762	0.693	cM
1708	Block28766	0.287	cM
1709	Block28764	0	cM
1710	Block28767	0.287	cM
1711	Block28769	0.288	cM
1712	Block28770	0.578	cM
1713	Block28772	0	cM
1714	Block28776	0.287	cM
1715	Block28775	0.287	cM
1716	Block28773	0	cM
1717	Block28777	0	cM
1718	Block28778	0.288	cM
1719	Block28780	0	cM
1720	Block28783	0.287	cM
1721	Block28781	0	cM
1722	Block28782	0	cM
1723	Block28785	0.872	cM
1724	Block28786	0.288	cM
1725	Block28784	0	cM
1726	Block28970	0.287	cM
1727	Block29490	7.59	cM
1728	Block29482	0.578	cM
1729	Block29477	0	cM
1730	Block29479	0.578	cM
1731	Block29469	0	cM
1732	Block29470	0	cM
1733	Block29472	0	cM
1734	Block29473	0.288	cM
1735	Block29466		cM
	chromosome LG6
1736	VrCs85	0	cM
1737	CEDG282	0	cM
1738	HAAS_VR_2489	0	cM
1739	Block29584	0	cM
1740	vr2-1966	0	cM
1741	ID6-1	0.578	cM
1742	Block29503	0	cM
1743	Block29583	0	cM
1744	Block29693	0	cM
1745	Block29696	0	cM
1746	Block29837	0.287	cM
1747	Block29504	0.835	cM
1748	HAAS_VR_37	0.038	cM
1749	Block29566	0	cM
1750	Block29695	0	cM
1751	Block29698	0	cM
1752	Block29757	0	cM
1753	Block29842	0	cM
1754	Block29843	0	cM
1755	Block29844	0	cM
1756	Block29846	0.262	cM
1757	vr3-879	0.1	cM
1758	MUS515	0.2	cM
1759	HAAS_VR_1768	0.073	cM
1760	Block29694	0.287	cM
1761	Block29946	0.14	cM
1762	VrC585	0.438	cM
1763	Block30129	0	cM
1764	Block30241	0.062	cM
1765	MUS197	0.516	cM
1766	Block30152	0.084	cM
1767	vr3-1172	0.1	cM
1768	P1-652	0.104	cM
1769	Block30311	0.578	cM
1770	Block30330	0.287	cM
1771	Block30334	0.287	cM
1772	Block30335	0.144	cM
1773	CEDG133	0.1	cM
1774	vr2-794	0.044	cM
1775	Block30338	0.056	cM
1776	P2-59	0.1	cM
1777	CEDG211	0	cM
1778	CEDG041b	0.015	cM
1779	Block30339	0.693	cM
1780	Block30345	0.092	cM
1781	GMES0202	0.6	cM
1782	Block30384	0.2	cM
1783	GMES0118	0	cM
1784	P1-1197	0.144	cM
1785	Block30387	0.256	cM
1786	GMES4478	0.3	cM
1787	P2-138	0.1	cM
1788	CEDG121	0.331	cM
1789	Block30406	0.069	cM
1790	CEDcAA001b	0	cM
1791	GMES1028	0.07	cM
1792	ID6-2	0.33	cM
1793	GMES0326	0	cM
1794	GMES0107	0	cM
1795	CEDG037	0	cM
1796	CEDG191	0	cM
1797	GMES0642	0	cM
1798	GMES3316d	0	cM
1799	cp03852	0	cM
1800	HAAS_VR_511	0.104	cM
1801	Block30392	0.229	cM
1802	Block30495	0.067	cM
1803	LFsoy9	0	cM
1804	ID6-3	0.4	cM
1805	GMES1697	0.333	cM
1806	Block30506	0.067	cM
1807	GMES0294b	0	cM
1808	MUS498	0.4	cM
1809	P1-555	0.1	cM
1810	GMES0861c	0	cM
1811	GMES1790b	0	cM
1812	GMES0330	0.177	cM
1813	Block30513	0.223	cM
1814	DMBSSR001	0	cM
1815	GMES1770b	0.4	cM
1816	cp01038	0.413	cM
1817	Block30515	0.387	cM
1818	CEDG144	0.8	cM
1819	HAAS_VR_263	0.1	cM
1820	LpCS250	0.042	cM
1821	Block30522	3.958	cM
1822	CEDG118	0.436	cM
1823	Block30539	0.064	cM
1824	MBSSR021	1.138	cM
1825	Block30542	1.201	cM
1826	Block30541	1.145	cM
1827	Block30543	3.372	cM
1828	Block30558	1.087	cM
1829	Block30560	0.057	cM
1830	LpCS205	0	cM
1831	X65	0.4	cM
1832	HAAS_VR_1929	0.7	cM
1833	CEDG245	0.3	cM
1834	P1-63	0.151	cM
1835	Block30557	0.049	cM
1836	GMES0659	1.152	cM
1837	Block30561	0.448	cM
1838	P1-530	0.524	cM
1839	Block30563	0.376	cM
1840	Mchr7-51	0.1	cM
1841	P1-558	0.3	cM
1842	P2-295	0.195	cM
1843	Block30577	0.855	cM
1844	ID6-4	0.05	cM
1845	P2-364	0.6	cM
1846	P1-398	0.3	cM
1847	CEDG146	0.395	cM
1848	Block30562	0.105	cM
1849	P1-807	0.8	cM
1850	C-682	0.297	cM
1851	Block30579	0.503	cM
1852	GMES1584	0.1	cM
1853	P1-647	0.311	cM
1854	Block30580	0.299	cM
1855	ID6-7	0.37	cM
1856	ID6-8	0.12	cM
1857	P1-158	0.354	cM
1858	Block30583	0.446	cM
1859	HAAS_VR_751	0.19	cM
1860	ID6-6	0.11	cM
1861	C3	0.569	cM
1862	Block30578	0.431	cM
1863	ID6-5	0.2	cM
1864	mc3	0	cM
1865	CEDG015	0	cM
1866	GMES1156C	0	cM
1867	MBSSR086	1.262	cM
1868	Block30584	0.538	cM
1869	Mchr7-38	0.24	cM
1870	ID6-9	0	cM
1871	ID6-10	0.66	cM
1872	p1-664	0.164	cM
1873	Block30581	0.136	cM
1874	MUS517	0.15	cM
1875	ID6-11	0.74	cM
1876	ID6-12	0.003	cM
1877	Block30587	0.607	cM
1878	MUS64	0.13	cM
1879	ID6-13	0.27	cM
1880	MUS428	0.652	cM
1881	Block30588	0.348	cM
1882	GMES1823	0.796	cM
1883	Block30597	1.004	cM
1884	MUS155	0.1	cM
1885	pO111	2.241	cM
1886	Block30601	0.629	cM
1887	Block30589	0.23	cM
1888	MUS30	0.627	cM
1889	Block30600	0.433	cM
1890	ID6-14	0.31	cM
1891	Block30598	0.857	cM
1892	Block30605	0.629	cM
1893	Block30603	0.044	cM
1894	Mchr7-31	0.584	cM
1895	Block30604	1.264	cM
1896	Block30607	0.916	cM
1897	Block30609	0.036	cM
1898	MUS208	0.593	cM
1899	Block30610	0.507	cM
1900	cp09781	0.121	cM
1901	Block30611	0.579	cM
1902	MUS168	0.337	cM
1903	Block30612	0.629	cM
1904	Block30701	0.629	cM
1905	Block30703	0.005	cM
1906	mc90	0	cM
1907	P1-415	0	cM
1908	X71	0	cM
1909	H6	0	cM
1910	P1-875	0	cM
1911	p3-671	0	cM
1912	p3-302	0	cM
1913	P1-810	0	cM
1914	C11	0	cM
1915	C12	0	cM
1916	P1-434	0	cM
1917	P1-644	0	cM
1918	P1-764	0	cM
1919	P2-510	0	cM
1920	P3-122	0	cM
1921	P3-494	0	cM
1922	p3-609	0	cM
1923	P3-790	0	cM
1924	L83	0.623	cM
1925	Block30708	0.629	cM
1926	Block30705	0.348	cM
1927	Mchr7-23	0.338	cM
1928	Block30697	0.457	cM
1929	Block30709	0.457	cM
1930	Block30706	0.457	cM
1931	Block30704	0.457	cM
1932	Block30714	0.434	cM
1933	Mchr7-18	0.023	cM
1934	Block30702	0.572	cM
1935	Block30713	0.343	cM
1936	Block30711	0.571	cM
1937	Block30710	0.457	cM
1938	Block30717	0.334	cM
1939	MUS147	0.124	cM
1940	Block30718	0.457	cM
1941	Block30719	0.457	cM
1942	Block30721	0.457	cM
1943	Block30723	0.457	cM
1944	Block30694	0.148	cM
1945	MUS508	0.309	cM
1946	Block31073	0.457	cM
1947	Block30712	0.458	cM
1948	Block30737	0.457	cM
1949	Block30740	0.801	cM
1950	Block30715	0.572	cM
1951	Block30699	0.343	cM
1952	Block31072	0.303	cM
1953	CEDG204	0.04	cM
1954	Block30698	0.18	cM
1955	ID6-17	0.45	cM
1956	Block31074	0.343	cM
1957	Block30743	0.343	cM
1958	Block31069	0.571	cM
1959	Block30745	0.153	cM
1960	ID6-16	0.647	cM
1961	Block31068	0.457	cM
1962	Block31067	0.859	cM
1963	Block30863	0.978	cM
1964	Block31089	0.4	cM
1965	Block30874	0.229	cM
1966	Block30907	0.228	cM
1967	Block30883	0.229	cM
1968	Block30885	0.229	cM
1969	Block30909	0.228	cM
1970	Block30928	0.229	cM
1971	Block30876	1.035	cM
1972	Block31035	0.672	cM
1973	HAAS_VR_1851	0.187	cM
1974	Block32231	0.457	cM
1975	Block32188	0.457	cM
1976	Block31861	0.457	cM
1977	Block32235	0.458	cM
1978	Block31471	0.457	cM
1979	Block31532	0.457	cM
1980	Block31326	0.457	cM
1981	Block31237	0.572	cM
1982	Block31222	0.341	cM
1983	Mchr7-6	0.001	cM
1984	Block31389	0.343	cM
1985	Block31469	0.343	cM
1986	Block31220	0.343	cM
1987	Block31289	0.343	cM
1988	Block31258	0.343	cM
1989	Block31225	0.343	cM
1990	Block32005	0.342	cM
1991	Block31216	0.343	cM
[truncated: 1,511 more rows]

## Sheet: Table S2
Table S2. Information on QTL studies for yield and yield-related traits in mungbean
NO.	Parents of population	Population type	Population size	Trait	Marker type	Reference
1	Berken×ACC41	RIL	221	hundred-grain weight, hard seedness	RFLP	Humphry et al., 2005
2	Berken×ACC41	RIL	121	geminating energy, germinating percentage, hundred-grain weight	RFLP	Mei et al., 2011a
3	Berken×ACC41	RIL	208	hundred-grain weight, plant height, number of nod, number of branch, pod length, pod width, Seeds per pod, Yield per plant, Yield per block, Days to burgeon, Days to flowering, Days to harf mature	RFLP	Mei et al., 2011b
4	JP211874×JP229096	BC1F1	250	hundred-grain weight, seed length, seed width, seed thickness, Seed water absorption, Seeds per pod, Rate of shattered pods, Pod number of twist, pod length, pod width, total number of pods, leaf width, Main stem thickness, Stem internode length, Main stem length, number of branch, Days to flowering, Days to maturity, Hypocotyl plus epicotyl length	SSR	Isemura et al., 2012
5	KUML29-1-3×W021	F2	186	Initial flowering time, Days to harf mature, Days to harvest, hundred-grain weight, Seeds per pod, pod length	SSR	Kajonphol et al., 2012
6	ACC41×Berken	RIL	190	plant height, number of nod, pod length, pod width, Seeds per pod, hundred-grain weight	SSR, RFLP, STS	Zhong, 2012
7	BM6×BM1	F2	142	hundred-grain weight, seed width	SSR	Alam et al., 2014
8	KPS1×V4718	F2	155	hundred-grain weight, Initial flowering time	SSR	Somta et al., 2015
9	Huaye1×Zijing1	F2	208	plant height, Young stem color, Main stem color, Growth habit, Podding habit, Mature leaf color, Trilobate leaf shape	SSR	Wang et al., 2017
10	VC2917 × ZL	RIL	256	Yield per plant, plant height, Relative leaf water content, biomass, maximum leaf area	SSR	Liu et al., 2017
11	Sonali ×Vigna radiata var	RIL	100	plant height, plant height index, maximum leaf area, biomass, biomass index, Yield per block, yield index, Relative leaf water content	SSR	Singh et al., 2017
12	VC2917×Yinggelv	RIL	261	Days to burgeon, trifoliolate stage, branching stage, Initial flowering time, Days to flowering, Days to maturity	SSR	Ma, 2019
13	Dahuaye×Jilv9	RIL	190	notched leaf shape, curled leaf shape, plant height, pod length, pod width, Seeds per pod, testa color, testa luster, Seed distribution density, Initial flowering time, chlorophyll content, hundred-grain weight, Young stem color, plant height, number of branch	SNP	Wang, 2020
14	VC2917 × ZL	RIL	261	Control root length, Treatment root length, Relative root length	SSR	Chen, 2020a
15	VC2917 × ZL	RIL	256	plant height, maximum leaf area, biomass, Yield per block, Relative leaf water content	SSR	Chen, 2020b
16	Sulu16-10×Weilu11	F2	136	Young stem color, Days to flowering, Days to maturity, plant height, number of nod	InDel	Ye et al., 2021
17	Sulu16-10×Weilu11	F3	134	Young stem color, Days to flowering, Days to maturity, plant height, number of nod	InDel	Ye et al., 2021
18	Dahuaye×Jilv9	RIL	175	plant height, number of branch, pod length, pod width, Seeds per pod, testa color, testa luster, Seed distribution density, Initial flowering time, chlorophyll content, hundred-grain weight	SNP	Jia et al.,2022
19	VC2917 × ZL	RIL	261	Days to burgeon, trifoliolate stage, branching stage, Initial flowering time, Days to branching to initial flowering, Days to flowering, Days to branching to flowering, Days to maturity	SSR	Cai et al.,2022
20	Sulu16-10×Weilu11	F2	136	Pod number per plant, Seeds per pod, number of branch, hundred-grain weight, Yield per plant	InDeI	Ye et al., 2023
21	Sulu16-10×Weilu11	F3	134	Pod number per plant, Seeds per pod, number of branch, hundred-grain weight, Yield per plant	InDeI	Ye et al., 2023
Reference
Alam, A.K.M.M., Somta, P., Muktadir, M.A., Srinives, P. (2014). Quantitative trait loci associated with seed weight in mungbean (Vigna radiata (L.) Wilczek). Kasetsart J. Nat. Sci. 48, 197-204.
Cai, D.B., Ding, D.H., Ma, L., Yang, S.Q., Sun, X.Y., Chen, J.B. (2022). Genetic linkage map encryption and QTL mapping for fertility-related traits in mung bean. Jiangsu Agri Sci. 50, 27-35. doi:10.15889/j.issn.1002-1302.2022.21.004
Chen, J.B. (2020a). Mapping of QTL for root length of mung bean seedlings under two water status. J Sichuan Agric Univ. 38, 416-422. doi:10.16036/j.issn.1000-2650.2020.04.006
Chen, J.B. (2020b). QTL mapping of yield-associated trait in mung bean. J Agric Sci Technol. 22, 38-48. doi:10.13304/j.nykjdb.2020.0517
Humphry, M.E., Lambrides, C.J., Chapman, S.C., Aitken, E.a.B., Imrie, B.C., Lawn, R.J., et al. (2005). Relationships between hard-seededness and seed weight in mungbean (Vigna radiata) assessed by QTL analysis. Plant Breeding. 124, 292-298. doi:10.1111/j.1439-0523.2005.01084.x
Isemura, T., Kaga, A., Tabata, S., Somta, P., Srinives, P., Shimizu, T., et al. (2012). Construction of a genetic linkage map and genetic analysis of domestication related traits in mungbean (Vigna radiata). PLoS One. 7, e41304. doi:10.1371/journal.pone.0041304
Jia, L., Wang, J., Wang, S.H., Chen, H.L., Cheng, X.Z., Du, J.D., et al. (2022). Identification of QTL associating with eleven agronomic traits in mungbean (Vigna radiata L.). J Plant Genet Resour. 23, 442-449. doi:10.13430/j.cnki.jpgr.20211021002
Kajonphol, T., Sangsiri, C., Somta, P., Toojinda, T., Srinives, P. (2012). SSR map construction and quantitative trait loci (QTL) identification of major agronomic traits in mungbean (Vigna radiata (L.) Wilczek). Sabrao J Breed Genet. 44, 71-86.
Liu, C.Y., Wu, J., Wang, L.F., Fan, B.J., Cao, Z.M., Su, Q.Z., et al. (2017). Quantitative trait locus mapping under irrigated and drought treatments based on a novel genetic linkage map in mungbean (Vigna radiata L.). Theor Appl Genet. 130, 2375-2393. doi:10.1007/s00122-017-2965-6
Ma, L. (2019). Genetic analysisand quantitative trait locus (QTL) mapping of mung bean growth period related traits. Master. Nanyang, Henan Province, China: Nanyang Normal University
Mei, L., Cheng, X.Z., Liu, C.J., Wang, S.H., Wang, L.X., Liu, C.Y., et al. (2011a). QTL mapping and interaction analysis for seed dormancy and seed weight of mungbean. J Plant Genet Resour. 12, 96-102. doi:10.13430/j.cnki.jpgr.2011.01.017
Mei, L., Cheng, X.Z., Wang, S.H., Wang, L.X., Cai, Q.X., Liu, C.J., et al. (2011b). QTL mapping of yield-associated agronomic traits in mungbean. J Plant Genet Resour. 12, 948-956. doi:10.13430/j.cnki.jpgr.2011.06.016
Singh, N., Mallick, J., Sagolsem, D., Mandal, N., Bhattacharyya, S. (2017). Mapping of molecular markers linked with MYMIV and yield attributing traits in mungbean. Indian J Genet. 78, 118-126. doi:10.5958/0975-6906.2018.00014.7
Somta, P., Chankaew, S., Kongjaimun, A., Srinives, P. (2015). QTLs controlling seed weight and days to flowering in mungbean [Vigna radiata (L.) Wilczek], their conservation in azuki bean [V. angularis (Ohwi) Ohwi and Ohashi] and rice bean [V. umbellata (Thunb.) Ohwi and Ohashi]. Agrivita. 37, 159-168. doi:10.17503/Agrivita-2015-37-2-p159-168
Wang, J. (2020). Construction of a high density genetic map and QTL analysis of agronomic traits in mungbean (Vigna radiata L.). Master. Beijing, China: Chinese Academy of Agricultural Sciences
Wang, J.H., Zhang, Y.W., Cheng, X.Z., Wang, L.X. (2017). Construction of genetic map and identification of QTLs related to agronomic traits in mung bean. Acta Agronomica Sinica. 43, 1096-1102. doi:10.3724/SP.J.1006.2017.01096
Ye, W.J., Yang, Y., Wang, P.R., Zhang, Y., Zhang, L.Y., Tian, D.F., et al. (2021). InDel marker development and QTL analysis of agronomic traits in mung bean [Vigna radiate (L.) Wilczek]. Mol Breeding. 41, 66. doi:10.1007/s11032-021-01233-0
Ye, W.J., Zhang, Y., Wang, P.R., Zhang, L.L., Tian, D.F., Wu, Z.J., et al. (2023). QTLs analysis for five yield-related traits in mungbean. Bull Bot. 58, 150-158. doi:10.11983/CBB22108
Zhong, M. (2012). Construction of genetic linkage map and mapping of bruchid-resistant gene (Brl) of mungbean. Master. Beijing, China: Chinese Academy of Agricultural Sciences

## Sheet: Table S3
Table S3. Detailed information of the initial QTLs used for QTL meta-analysis in this study
QTL name	Chromosome	Trait	From	To	CI	Lodscore	R2	position	from	to	Reference
QTL-1	LG1	hundred-grain weight	76.2	81.8	5.6	9.28261	11.8	46.5	46	47	Humphry et al., 2005
QTL-2	LG2	hundred-grain weight	9.1	25.9	16.8	7.95652	13.7	17.5	9.1	25.9	Humphry et al., 2005
QTL-3	LG2	hundred-grain weight	77.1	85.9	8.8	3.6087	4.2	81.5	77.1	85.9	Humphry et al., 2005
QTL-4	LG4	hundred-grain weight	24.6	27.6	3	4	4.5	24.9	24.6	25.2	Humphry et al., 2005
QTL-5	LG5	hundred-grain weight	14.8	34.1	19.3	8.21739	12	24.45	14.8	34.1	Humphry et al., 2005
QTL-6	LG5	hundred-grain weight	47.4	59.4	12	4.28261	7	38	16.6	59.4	Humphry et al., 2005
QTL-7	LG9	hundred-grain weight	44.7	59	14.3	11.7174	18.8	51.85	44.7	59	Humphry et al., 2005
QTL-8	LG10	hundred-grain weight	15.1	22.1	7	4.13043	4.9	21.85	21.1	22.6	Humphry et al., 2005
QTL-9	LG11	hundred-grain weight	0	12.7	12.7	7.76087	10.7	47.35	46	48.7	Humphry et al., 2005
QTL-10	LG1	hundred-grain weight	58.5	76.2	17.7	3.5	12.4	105.65	96.8	114.5	Humphry et al., 2005
QTL-11	LG2	hundred-grain weight	9.1	25.9	16.8	8.08696	14.1	17.5	9.1	25.9	Humphry et al., 2005
QTL-12	LG2	hundred-grain weight	77.1	85.9	8.8	4.73913	6	81.5	77.1	85.9	Humphry et al., 2005
QTL-13	LG5	hundred-grain weight	47.4	59.4	12	3.41304	5.2	38	16.6	59.4	Humphry et al., 2005
QTL-14	LG6	hundred-grain weight	0	13.1	13.1	4.93478	7	6.55	0	13.1	Humphry et al., 2005
QTL-15	LG7	hundred-grain weight	10.2	22.1	11.9	6.30435	9.1	16.15	10.2	22.1	Humphry et al., 2005
QTL-16	LG9	hundred-grain weight	44.7	59	14.3	5.56522	9.1	51.85	44.7	59	Humphry et al., 2005
QTL-17	LG10	hundred-grain weight	15.1	22.1	7	4.36957	5.5	21.85	21.1	22.6	Humphry et al., 2005
QTL-18	LG11	hundred-grain weight	0	12.7	12.7	9.23913	15.1	47.35	46	48.7	Humphry et al., 2005
QTL-19	LG1	hard seedness	35.4	44.6	9.2	13.6087	23.2	78.3	73.7	82.9	Humphry et al., 2005
QTL-20	LG2	hard seedness	9.1	25.9	16.8	5.82609	11.2	17.5	9.1	25.9	Humphry et al., 2005
QTL-21	LG3	hard seedness	0	18.9	18.9	3.6087	4.9	10.05	1.2	18.9	Humphry et al., 2005
QTL-22	LG11	hard seedness	12.7	24.6	11.9	5.67391	10	26.05	6.1	46	Humphry et al., 2005
QTL-23	LG1	hard seedness	35.4	44.6	9.2	5.69565	10.9	78.3	73.7	82.9	Humphry et al., 2005
QTL-24	LG1	geminating energy	44.6	58.5	3.9	5.98	12.14	84.45	72.1	96.8	Mei et al., 2011a
QTL-25	LG11	geminating energy	12.7	24.6	11.9	4.84	8.66	26.05	6.1	46	Mei et al., 2011a
QTL-26	LG11	geminating energy	24.6	39.9	15.3	4.68	8.17	4.75	3.4	6.1	Mei et al., 2011a
QTL-27	LG1	germinating percentage	35.4	44.6	9.8	2.64	4.34	78.3	73.7	82.9	Mei et al., 2011a
QTL-28	LG1	germinating percentage	44.6	58.5	13.9	6.13	12.69	84.45	72.1	96.8	Mei et al., 2011a
QTL-29	LG11	germinating percentage	12.7	24.6	11.9	4.48	8.11	26.05	6.1	46	Mei et al., 2011a
QTL-30	LG11	germinating percentage	24.6	39.9	15.3	4.3	7.12	4.75	3.4	6.1	Mei et al., 2011a
QTL-31	LG2	hundred-grain weight	9.1	25.9	16.8	5.8	8.95	17.5	9.1	25.9	Mei et al., 2011a
QTL-32	LG2	hundred-grain weight	62.7	68	5.3	4.73	6.77	74.45	71.8	77.1	Mei et al., 2011a
QTL-33	LG8	hundred-grain weight	19.6	24.4	4.8	6.04	8.4	22	19.6	24.4	Mei et al., 2011a
QTL-34	LG9	hundred-grain weight	44.7	59	14.3	3.56	4.58	51.85	44.7	59	Mei et al., 2011a
QTL-35	LG10	hundred-grain weight	0	15.1	15.1	2.76	4.18	16.55	12	21.1	Mei et al., 2011a
QTL-36	LG10	hundred-grain weight	15.1	22.1	7	2.76	3.81	21.85	21.1	22.6	Mei et al., 2011a
QTL-37	LG11	hundred-grain weight	0	12.7	12.7	6.63	10.36	47.35	46	48.7	Mei et al., 2011a
QTL-38	LG5	plant height	34.1	47.5	13.3	3.02	4.47	11.45	6.3	16.6	Mei et al., 2011b
QTL-39	LG7	plant height	37.3	47.7	9.4	5.51	9.11	38.3	38.3	38.3	Mei et al., 2011b
QTL-40	LG9	plant height	18.5	26.2	7.7	3.49	5.89	15.1	5.5	24.7	Mei et al., 2011b
QTL-41	LG9	plant height	26.2	31.1	3.9	3.6	5.81	28.15	26.2	30.1	Mei et al., 2011b
QTL-42	LG2	plant height	0	9.1	9.1	2.5	4.77	4.55	0	9.1	Mei et al., 2011b
QTL-43	LG2	plant height	46.3	67	20.7	2.68	4.43	56.65	46.3	67	Mei et al., 2011b
QTL-44	LG2	plant height	71.8	77.1	5.3	3.07	4.43	74.45	71.8	77.1	Mei et al., 2011b
QTL-45	LG8	plant height	19.6	24.4	4.8	4.33	6.49	22	19.6	24.4	Mei et al., 2011b
QTL-46	LG8	plant height	27.7	35.6	4.9	8.34	12.78	30.15	27.7	32.6	Mei et al., 2011b
QTL-47	LG9	plant height	44.7	59	14.3	3.88	6.7	51.85	44.7	59	Mei et al., 2011b
QTL-48	LG5	number of nod	47.4	59.4	12	4.78	10.67	42.8	26.2	59.4	Mei et al., 2011b
QTL-49	LG3	number of nod	0	18.9	18.9	3.46	9.54	10.05	1.2	18.9	Mei et al., 2011b
QTL-50	LG5	number of nod	14.8	35.1	19.3	3.74	24.24	24.45	14.8	34.1	Mei et al., 2011b
QTL-51	LG5	number of branch	47.4	59.4	12	2.51	5.48	53.4	47.4	59.4	Mei et al., 2011b
QTL-52	LG9	number of branch	26.2	30.1	3.9	2.91	5.3	28.15	26.2	30.1	Mei et al., 2011b
QTL-53	LG9	number of branch	34.7	49	14.3	3.12	8.55	51.85	44.7	59	Mei et al., 2011b
QTL-54	LG8	number of branch	0	1.8	1.8	4.59	8.48	39.1	38.8	39.4	Mei et al., 2011b
QTL-55	LG1	number of branch	26.3	35.4	9.1	3.85	4.82	69.15	64.6	73.7	Mei et al., 2011b
QTL-56	LG2	number of branch	37.8	46.1	8.5	13.16	19.05	41.4	36.5	46.3	Mei et al., 2011b
QTL-57	LG2	number of branch	46.1	66.8	20.7	13.45	22.64	56.65	46.3	67	Mei et al., 2011b
QTL-58	LG5	number of branch	14.8	34.1	19.3	5.08	17.39	24.45	14.8	34.1	Mei et al., 2011b
QTL-59	LG8	number of branch	0.5	19.6	19.1	3.46	4.06	10.05	0.5	19.6	Mei et al., 2011b
QTL-60	LG9	number of branch	59	65.5	6.5	5.32	6.16	59.65	59	60.3	Mei et al., 2011b
QTL-61	LG11	number of branch	24.6	39.3	15.3	3.14	3.73	4.75	3.4	6.1	Mei et al., 2011b
QTL-62	LG5	pod length	47.4	59.4	12	8.66	14.83	53.4	47.4	59.4	Mei et al., 2011b
QTL-63	LG5	pod length	59.4	76.5	17.1	2.55	3.77	67.95	59.4	76.5	Mei et al., 2011b
QTL-64	LG9	pod length	34.7	49	14.3	4.15	5.65	51.85	44.7	59	Mei et al., 2011b
QTL-65	LG10	pod length	22.1	38.7	16.6	2.86	4.32	39.5	22.6	56.4	Mei et al., 2011b
QTL-66	LG11	pod length	24.6	39.3	15.3	4.59	8.48	4.75	3.4	6.1	Mei et al., 2011b
QTL-67	LG5	pod length	47.4	59.4	12	14.33	18.71	53.4	47.4	59.4	Mei et al., 2011b
QTL-68	LG5	pod length	59.4	76.5	17.1	6.24	9.08	67.95	59.4	76.5	Mei et al., 2011b
QTL-69	LG7	pod length	0	10.2	10.2	3.05	2.95	5.1	0	10.2	Mei et al., 2011b
QTL-70	LG9	pod length	34.7	49	14.3	5.39	6.63	51.85	44.7	59	Mei et al., 2011b
QTL-71	LG10	pod length	15.1	22.1	7	6.51	7.34	21.85	21.1	22.6	Mei et al., 2011b
QTL-72	LG10	pod length	22.1	38.7	16.6	6.82	9.81	39.5	22.6	56.4	Mei et al., 2011b
QTL-73	LG11	pod length	24.6	39.9	15.3	6.13	6.95	4.75	3.4	6.1	Mei et al., 2011b
QTL-74	LG1	pod width	58.5	76.2	17.7	2.9	5.07	105.65	96.8	114.5	Mei et al., 2011b
QTL-75	LG2	pod width	9.1	25.9	16.8	4.94	10.52	17.5	9.1	25.9	Mei et al., 2011b
QTL-76	LG4	pod width	27.6	42.9	15.3	3.06	5.19	34.05	25.2	42.9	Mei et al., 2011b
QTL-77	LG5	pod width	47.4	59.4	12	2.82	3.96	53.4	47.4	59.4	Mei et al., 2011b
QTL-78	LG8	pod width	0.5	19.6	19.1	4.04	9.19	10.05	0.5	19.6	Mei et al., 2011b
QTL-79	LG8	pod width	27.7	32.6	4.9	4.88	7.14	30.15	27.7	32.6	Mei et al., 2011b
QTL-80	LG9	pod width	41.6	44.7	3.1	5.19	7.4	35.05	25.4	44.7	Mei et al., 2011b
QTL-81	LG2	pod width	25.9	37.8	11.9	6.17	9.78	31.2	25.9	36.5	Mei et al., 2011b
QTL-82	LG6	pod width	25.6	37.7	12.1	8.12	12.28	31.65	25.6	37.7	Mei et al., 2011b
QTL-83	LG6	pod width	46.5	58.7	12.2	3.8	4.71	51.6	45.5	57.7	Mei et al., 2011b
QTL-84	LG7	pod width	0	10.2	10.2	3.58	4.66	5.1	0	10.2	Mei et al., 2011b
QTL-85	LG9	pod width	59	65.5	65.5	5.48	7.05	59.65	59	60.3	Mei et al., 2011b
QTL-86	LG8	pod width	0	1.8	1.8	4.97	6.18	39.1	38.8	39.4	Mei et al., 2011b
QTL-87	LG8	pod width	1.8	14.5	12.7	6.08	7.05	40.4	39.4	41.4	Mei et al., 2011b
QTL-88	LG2	Seeds per pod	76.3	85.1	8.8	3.31	6.18	81.5	77.1	85.9	Mei et al., 2011b
QTL-89	LG1	Seeds per pod	58.5	76.2	17.7	2.95	7.82	105.65	96.8	114.5	Mei et al., 2011b
QTL-90	LG1	Seeds per pod	76.2	81.8	5.6	3.01	6.89	80.75	47	114.5	Mei et al., 2011b
QTL-91	LG2	Seeds per pod	71.8	77.1	5.3	3.57	5.05	74.45	71.8	77.1	Mei et al., 2011b
QTL-92	LG4	Seeds per pod	67	84.5	17.5	5.65	11.56	71.5	58.5	84.5	Mei et al., 2011b
QTL-93	LG5	Seeds per pod	34.1	47.5	13.3	6.73	10.03	11.45	6.3	16.6	Mei et al., 2011b
QTL-94	LG7	Seeds per pod	10.2	22.1	11.9	3.94	5.8	16.15	10.2	22.1	Mei et al., 2011b
QTL-95	LG1	Yield per plant	35.4	44.6	9.2	2.5	5.59	78.3	73.7	82.9	Mei et al., 2011b
QTL-96	LG8	Yield per plant	9.6	15.4	4.8	3.17	5.85	22	19.6	24.4	Mei et al., 2011b
QTL-97	LG3	Yield per plant	0	18.9	18.9	4.07	6.3	10.05	1.2	18.9	Mei et al., 2011b
QTL-98	LG2	Yield per block	76.3	85.1	8.8	2.61	3.57	81.5	77.1	85.9	Mei et al., 2011b
QTL-99	LG7	Yield per block	26.2	38.3	12.1	5.6	9.47	32.25	26.2	38.3	Mei et al., 2011b
QTL-100	LG7	Yield per block	38.3	47.7	9.4	5.61	8.76	38.3	38.3	38.3	Mei et al., 2011b
QTL-101	LG9	Yield per block	34.7	49	14.3	3.75	5.33	51.85	44.7	59	Mei et al., 2011b
QTL-102	LG10	Yield per block	0	15.1	15.1	6.97	11.23	16.55	12	21.1	Mei et al., 2011b
QTL-103	LG11	Yield per block	24.6	39.9	15.3	4.39	6.88	4.75	3.4	6.1	Mei et al., 2011b
QTL-104	LG9	Days to burgeon	34.7	49	14.3	4.99	11.89	51.85	44.7	59	Mei et al., 2011b
QTL-105	LG1	Days to burgeon	76.2	81.8	5.6	4.08	9.43	80.75	47	114.5	Mei et al., 2011b
QTL-106	LG2	Days to burgeon	71.8	77.1	5.3	2.85	3.98	74.45	71.8	77.1	Mei et al., 2011b
QTL-107	LG4	Days to burgeon	67	84.5	17.5	3.51	7.28	71.5	58.5	84.5	Mei et al., 2011b
QTL-108	LG5	Days to burgeon	47.4	59.4	12	2.8	4.03	53.4	47.4	59.4	Mei et al., 2011b
QTL-109	LG7	Days to burgeon	10.2	22.1	11.9	3.92	5.75	16.15	10.2	22.1	Mei et al., 2011b
QTL-110	LG9	Days to flowering	59	65.5	6.5	8.33	15.15	59.65	59	60.3	Mei et al., 2011b
QTL-111	LG8	Days to flowering	0	18.1	18.1	2.96	4.95	39.1	38.8	39.4	Mei et al., 2011b
QTL-112	LG1	Days to flowering	44.6	58.5	13.9	5.05	8.97	84.45	72.1	96.8	Mei et al., 2011b
QTL-113	LG9	Days to flowering	34.7	49	14.3	5.71	11.32	51.85	44.7	59	Mei et al., 2011b
QTL-114	LG3	Days to harf mature	0	18.9	18.9	4.08	6.32	10.05	1.2	18.9	Mei et al., 2011b
QTL-115	LG9	Days to harf mature	34.7	49	14.3	5.17	11.26	51.85	44.7	59	Mei et al., 2011b
QTL-116	LG9	Days to harf mature	59	65.5	6.5	5.09	10.12	59.65	59	60.3	Mei et al., 2011b
QTL-117	LG2	Days to harf mature	36.8	45.3	8.5	15.04	17.74	41.4	36.5	46.3	Mei et al., 2011b
QTL-118	LG9	Days to harf mature	34.7	49	14.3	24.22	31.36	51.85	44.7	59	Mei et al., 2011b
QTL-119	LG1	hundred-grain weight	24.8	26.7	1.9	14.9	4.4	25.75	24.8	26.7	Isemura et al., 2012
QTL-120	LG1	hundred-grain weight	56.6	70.8	14.2	14.9	4.9	63.7	56.6	70.8	Isemura et al., 2012
QTL-121	LG2	hundred-grain weight	58	74.7	16.7	20.6	16.6	66.35	58	74.7	Isemura et al., 2012
QTL-122	LG3	hundred-grain weight	29.4	31.4	2	10.3	7	0	0	0	Isemura et al., 2012
QTL-123	LG7	hundred-grain weight	0	2.5	2.5	10	6.3	1.25	0	2.5	Isemura et al., 2012
QTL-124	LG8	hundred-grain weight	46.4	51.8	5.4	28.1	22.2	69.8	67.1	72.5	Isemura et al., 2012
QTL-125	LG11	hundred-grain weight	19	24.3	5.3	9	5.9	21.65	19	24.3	Isemura et al., 2012
QTL-126	LG1	seed length	31.2	32	0.8	16.79	5.7	31.6	31.2	32	Isemura et al., 2012
QTL-127	LG1	seed length	70.8	72.5	1.7	16.79	6.9	71.65	70.8	72.5	Isemura et al., 2012
QTL-128	LG2	seed length	58	74.7	16.7	13.06	11.4	66.35	58	74.7	Isemura et al., 2012
QTL-129	LG3	seed length	33.5	35.1	1.6	5.62	4.3	0	0	0	Isemura et al., 2012
QTL-130	LG7	seed length	5	8.3	3.3	12.17	9.6	6.65	5	8.3	Isemura et al., 2012
QTL-131	LG8	seed length	46.4	51.8	5.4	22.12	20.4	69.8	67.1	72.5	Isemura et al., 2012
QTL-132	LG11	seed length	28.9	31	2.1	3	2.6	29.95	28.9	31	Isemura et al., 2012
QTL-133	LG1	seed width	28.7	30.8	2.1	4.27	4.3	29.75	28.7	30.8	Isemura et al., 2012
QTL-134	LG2	seed width	58	74.7	16.7	12.8	14.3	66.35	58	74.7	Isemura et al., 2012
QTL-135	LG3	seed width	27.7	29.4	1.7	5.48	5.4	0	0	0	Isemura et al., 2012
QTL-136	LG7	seed width	5	8.3	3.3	11.56	10.9	6.65	5	8.3	Isemura et al., 2012
QTL-137	LG8	seed width	46.4	51.8	5.4	14.66	15.1	69.8	67.1	72.5	Isemura et al., 2012
QTL-138	LG11	seed width	25.5	27.6	2.1	4.14	4.2	26.55	25.5	27.6	Isemura et al., 2012
QTL-139	LG2	seed thickness	58	74.7	16.7	12.7	14.6	66.35	58	74.7	Isemura et al., 2012
QTL-140	LG3	seed thickness	27.7	29.4	1.7	3.4	3.8	0	0	0	Isemura et al., 2012
QTL-141	LG7	seed thickness	2.5	4.6	2.1	10.5	9.7	3.55	2.5	4.6	Isemura et al., 2012
QTL-142	LG8	seed thickness	46.4	51.8	5.4	20.3	22.7	69.8	67.1	72.5	Isemura et al., 2012
QTL-143	LG11	seed thickness	19	24.3	5.3	3	2.9	21.65	19	24.3	Isemura et al., 2012
QTL-144	LG1	Seed water absorption	56.6	70.8	14.2	26.5	33.7	63.7	56.6	70.8	Isemura et al., 2012
QTL-145	LG2	Seed water absorption	54.5	57.1	2.6	6.3	6.1	55.8	54.5	57.1	Isemura et al., 2012
QTL-146	LG3	Seed water absorption	15.3	24.4	9.1	14.7	14.2	0	0	0	Isemura et al., 2012
QTL-147	LG4	Seed water absorption	22.1	23.1	1	3.7	4.6	22.6	22.1	23.1	Isemura et al., 2012
QTL-148	LG1	Seeds per pod	72.5	72.9	0.4	5.2	9.1	72.7	72.5	72.9	Isemura et al., 2012
QTL-149	LG9	Seeds per pod	15.2	17.7	2.5	3.7	7	28.8	17.7	39.9	Isemura et al., 2012
QTL-150	LG1	Rate of shattered pods at one week	42.2	43.8	1.6	7.1	10.3	43	42.2	43.8	Isemura et al., 2012
QTL-151	LG6	Rate of shattered pods at one week	17.6	26.7	9.1	4.2	5.7	22.15	17.6	26.7	Isemura et al., 2012
QTL-152	LG7	Rate of shattered pods at one week	15.1	16.3	1.2	13	18.4	15.7	15.1	16.3	Isemura et al., 2012
QTL-153	LG1	Rate of shattered pods at two week	42.2	43.8	1.6	9.9	13.4	43	42.2	43.8	Isemura et al., 2012
QTL-154	LG6	Rate of shattered pods at two week	17.6	26.7	9.1	3.4	4.5	22.15	17.6	26.7	Isemura et al., 2012
QTL-155	LG7	Rate of shattered pods at two week	16.3	19.9	3.6	15.1	20.6	18.1	16.3	19.9	Isemura et al., 2012
QTL-156	LG1	Rate of shattered pods at four week	48.5	49.3	0.8	21.4	24.2	48.9	48.5	49.3	Isemura et al., 2012
QTL-157	LG6	Rate of shattered pods at four week	17.6	26.7	9.1	5.5	6.1	22.15	17.6	26.7	Isemura et al., 2012
QTL-158	LG7	Rate of shattered pods at four week	16.3	19.9	3.6	19.5	21.7	18.1	16.3	19.9	Isemura et al., 2012
QTL-159	LG1	Pod number of twist	49.3	50.6	1.3	7.6	12.4	49.95	49.3	50.6	Isemura et al., 2012
QTL-160	LG7	Pod number of twist	8.3	10.4	2.1	6.5	10.8	9.35	8.3	10.4	Isemura et al., 2012
QTL-161	LG1	pod length	50.6	51	0.4	21.5	17.8	50.8	50.6	51	Isemura et al., 2012
QTL-162	LG2	pod length	81.3	82.5	1.2	19.1	15	81.9	81.3	82.5	Isemura et al., 2012
QTL-163	LG7	pod length	5	8.3	3.3	22.3	20.5	6.65	5	8.3	Isemura et al., 2012
QTL-164	LG8	pod length	53.8	54.2	0.4	7.2	5.9	74.7	74.5	74.9	Isemura et al., 2012
QTL-165	LG9	pod length	15.2	17.7	2.5	7.3	5.5	28.8	17.7	39.9	Isemura et al., 2012
QTL-166	LG2	pod width	52.1	52.7	0.6	9.6	8.6	52.4	52.1	52.7	Isemura et al., 2012
QTL-167	LG7	pod width	5	8.3	3.3	30.1	28.5	6.65	5	8.3	Isemura et al., 2012
QTL-168	LG8	pod width	46.4	51.8	5.4	20.7	19.5	69.8	67.1	72.5	Isemura et al., 2012
QTL-169	LG11	pod width	19	24.3	5.3	5.8	4.8	21.65	19	24.3	Isemura et al., 2012
QTL-170	LG2	total number of pods	52.1	52.7	0.6	3.7	6.5	52.4	52.1	52.7	Isemura et al., 2012
QTL-171	LG4	total number of pods	38	39.2	1.2	4.4	5.8	38.6	38	39.2	Isemura et al., 2012
QTL-172	LG4	total number of pods	57.7	72.6	14.9	4.4	12	65.15	57.7	72.6	Isemura et al., 2012
QTL-173	LG7	total number of pods	16.3	19.9	3.6	3.8	6.2	18.1	16.3	19.9	Isemura et al., 2012
QTL-174	LG7	leaf width	27.3	37.7	10.4	3.4	7.5	32.5	27.3	37.7	Isemura et al., 2012
QTL-175	LG2	Main stem thickness	58	74.7	16.7	4.6	10.2	66.35	58	74.7	Isemura et al., 2012
QTL-176	LG8	Hypocotyl plus epicotyl length	37	43.1	6.1	9.4	14.1	60.75	57.7	63.8	Isemura et al., 2012
QTL-177	LG10	Hypocotyl plus epicotyl length	37.1	48.3	11.2	10.9	16.4	42.7	37.1	48.3	Isemura et al., 2012
QTL-178	LG3	Stem internode length 1	5	11.9	6.9	3.5	6.1	8.45	5	11.9	Isemura et al., 2012
QTL-179	LG8	Stem internode length 1	10.8	18.5	7.7	4.3	8.9	35.35	31.5	39.2	Isemura et al., 2012
QTL-180	LG10	Stem internode length 1	37.1	48.3	11.2	3.6	6.1	42.7	37.1	48.3	Isemura et al., 2012
QTL-181	LG10	Stem internode length 2	37.1	48.3	11.2	3.3	7.2	42.7	37.1	48.3	Isemura et al., 2012
QTL-182	LG10	Stem internode length 3	28	37.1	9.1	5	12.7	32.55	28	37.1	Isemura et al., 2012
QTL-183	LG1	Stem internode length5	10.9	12.6	1.7	7.1	10	11.75	10.9	12.6	Isemura et al., 2012
QTL-184	LG3	Stem internode length5	3.7	5	1.3	4.5	5.9	4.35	3.7	5	Isemura et al., 2012
QTL-185	LG10	Stem internode length5	37.1	48.3	11.2	14.1	21.2	42.7	37.1	48.3	Isemura et al., 2012
QTL-186	LG1	Stem internode length6	14.7	19.3	4.6	5.5	7.9	17	14.7	19.3	Isemura et al., 2012
QTL-187	LG3	Stem internode length6	5	11.9	6.9	4.2	5.5	8.45	5	11.9	Isemura et al., 2012
QTL-188	LG10	Stem internode length6	37.1	48.3	11.2	19.8	27.1	42.7	37.1	48.3	Isemura et al., 2012
QTL-189	LG10	Stem internode length7	37.1	48.3	11.2	15.7	26.1	42.7	37.1	48.3	Isemura et al., 2012
QTL-190	LG10	Stem internode length8	37.1	48.3	11.2	12	21.3	42.7	37.1	48.3	Isemura et al., 2012
QTL-191	LG2	Stem internode length9	58	74.7	16.7	7.9	10	66.35	58	74.7	Isemura et al., 2012
QTL-192	LG6	Stem internode length9	37.7	43.6	5.9	3.4	4.3	40.65	37.7	43.6	Isemura et al., 2012
QTL-193	LG9	Stem internode length9	15.2	17.7	2.5	17.1	22.5	28.8	17.7	39.9	Isemura et al., 2012
QTL-194	LG10	Stem internode length9	37.1	48.3	11.2	5.4	6	42.7	37.1	48.3	Isemura et al., 2012
QTL-195	LG2	Stem internode length 10	58	74.7	16.7	8	6.8	66.35	58	74.7	Isemura et al., 2012
QTL-196	LG6	Stem internode length 10	37.7	43.6	5.9	5.7	4.5	40.65	37.7	43.6	Isemura et al., 2012
QTL-197	LG9	Stem internode length 10	17.7	25.7	8	42	47.7	21.7	17.7	25.7	Isemura et al., 2012
QTL-198	LG10	Stem internode length 10	37.1	48.3	11.2	4.1	3.1	42.7	37.1	48.3	Isemura et al., 2012
QTL-199	LG1	Main stem length	1.7	10.9	9.2	5.3	5.1	6.3	1.7	10.9	Isemura et al., 2012
QTL-200	LG2	Main stem length	58	74.7	16.7	7.4	7.3	66.35	58	74.7	Isemura et al., 2012
QTL-201	LG3	Main stem length	13.2	14	0.8	4.1	4.3	41.95	0	83.9	Isemura et al., 2012
QTL-202	LG6	Main stem length	43.6	55.4	11.8	5.5	5.6	49.5	43.6	55.4	Isemura et al., 2012
QTL-203	LG9	Main stem length	12	15.2	3.2	20	20.6	13.6	12	15.2	Isemura et al., 2012
QTL-204	LG10	Main stem length	37.1	48.3	11.2	14.8	13.8	42.7	37.1	48.3	Isemura et al., 2012
QTL-205	LG2	number of branch	58	74.7	16.7	14.3	22.3	66.35	58	74.7	Isemura et al., 2012
QTL-206	LG4	number of branch	57.7	72.6	14.9	3.8	10.6	65.15	57.7	72.6	Isemura et al., 2012
QTL-207	LG6	number of branch	27.2	32.1	4.9	5.9	6.4	29.65	27.2	32.1	Isemura et al., 2012
QTL-208	LG1	number of branch	56.1	56.6	0.5	5.5	11.5	56.35	56.1	56.6	Isemura et al., 2012
QTL-209	LG5	number of branch	36.1	37	0.9	3.7	6.2	36.55	36.1	37	Isemura et al., 2012
QTL-210	LG2	Days to flowering	58	74.7	16.7	46.7	32.9	66.35	58	74.7	Isemura et al., 2012
QTL-211	LG4	Days to flowering	74.6	77.9	3.3	30.2	24	74.6	74.6	74.6	Isemura et al., 2012
QTL-212	LG6	Days to flowering	27.2	32.1	4.9	36.7	17.4	29.65	27.2	32.1	Isemura et al., 2012
QTL-213	LG11	Days to flowering	14.6	16.2	1.6	17	6.6	15.4	14.6	16.2	Isemura et al., 2012
QTL-214	LG2	Days to maturity	54.5	57.1	2.6	24	20.3	55.8	54.5	57.1	Isemura et al., 2012
QTL-215	LG4	Days to maturity	74.6	77.9	3.3	13.5	19.9	74.6	74.6	74.6	Isemura et al., 2012
QTL-216	LG6	Days to maturity	32.1	34.2	2.1	11.6	8.3	33.15	32.1	34.2	Isemura et al., 2012
QTL-217	LG7	Days to maturity	20.7	22.3	1.6	3.6	2.5	21.5	20.7	22.3	Isemura et al., 2012
QTL-218	LG9	Days to maturity	15.2	17.7	2.5	13.7	10.2	28.8	17.7	39.9	Isemura et al., 2012
QTL-219	LG11	Days to maturity	16.2	18.6	2.4	4.9	3.8	17.4	16.2	18.6	Isemura et al., 2012
QTL-220	LG2	Initial flowering time	70.3	84.8	14.5	13.3	15.88	NA	NA	NA	Kajonphol et al., 2012
QTL-221	LG4	Initial flowering time	9.8	13.3	3.5	6.5	7.39	NA	NA	NA	Kajonphol et al., 2012
QTL-222	LG4	Initial flowering time	59.3	73.6	14.3	20.1	28.57	56.9	39.2	74.6	Kajonphol et al., 2012
QTL-223	LG11	Initial flowering time	70.3	84.8	14.5	5.3	6.28	NA	NA	NA	Kajonphol et al., 2012
QTL-224	LG2	Days to harf mature	70.3	84.8	14.5	10.2	12.58	NA	NA	NA	Kajonphol et al., 2012
QTL-225	LG4	Days to harf mature	9.8	13.3	3.5	7.1	8.43	NA	NA	NA	Kajonphol et al., 2012
QTL-226	LG4	Days to harf mature	59.3	73.6	14.3	18.5	27.83	56.9	39.2	74.6	Kajonphol et al., 2012
QTL-227	LG2	Days to harvest	70.3	84.8	14.5	8.4	15.6	NA	NA	NA	Kajonphol et al., 2012
QTL-228	LG4	Days to harvest	9.8	13.3	3.5	6.5	11.73	NA	NA	NA	Kajonphol et al., 2012
QTL-229	LG4	Days to harvest	13.3	33.1	19.8	5.9	11.63	NA	NA	NA	Kajonphol et al., 2012
QTL-230	LG2	hundred-grain weight	0	11.6	11.6	6.6	14.56	NA	NA	NA	Kajonphol et al., 2012
QTL-231	LG2	hundred-grain weight	19.1	21	1.9	7.7	12.99	NA	NA	NA	Kajonphol et al., 2012
QTL-232	LG4	hundred-grain weight	33.1	37.9	4.8	4.9	11.96	NA	NA	NA	Kajonphol et al., 2012
QTL-233	LG8	hundred-grain weight	52.2	56.6	4.4	5	8.16	NA	NA	NA	Kajonphol et al., 2012
QTL-234	LG9	hundred-grain weight	19.2	24.1	4.9	4.5	7.22	15.2	15.2	15.2	Kajonphol et al., 2012
QTL-235	LG11	hundred-grain weight	49.1	54.2	5.1	5.2	8.74	NA	NA	NA	Kajonphol et al., 2012
QTL-236	LG1	Seeds per pod	26.2	34.7	8.5	5.7	12.29	NA	NA	NA	Kajonphol et al., 2012
QTL-237	LG1	Seeds per pod	42.4	46.2	3.8	5.6	12.08	NA	NA	NA	Kajonphol et al., 2012
QTL-238	LG7	pod length	58.9	68.7	9.8	5.2	10.74	NA	NA	NA	Kajonphol et al., 2012
QTL-239	LG8	pod length	50.4	52.2	1.8	4.9	9.26	NA	NA	NA	Kajonphol et al., 2012
QTL-240	LG2	plant height	27.8	29.8	2	7.06	14.7	59.25	51.5	67	Zhong, 2012
QTL-241	LG7	plant height	7.4	8.8	1.4	3.95	8.17	20.55	2.8	38.3	Zhong, 2012
QTL-242	LG5	plant height	29.2	32.4	3.2	3.87	7.97	46.55	16.6	76.5	Zhong, 2012
QTL-243	LG2	plant height	19.2	20.8	1.6	8.53	16	75.9	74.7	77.1	Zhong, 2012
QTL-244	LG11	plant height	28	29.1	1.1	5.36	8.79	23.8	26.4	21.2	Zhong, 2012
QTL-245	LG9	plant height	12.5	15.7	3.2	4.85	8.6	64.6	63.7	65.5	Zhong, 2012
QTL-246	LG4	plant height	12.7	14.8	2.1	2.82	4.55	13.7	13.7	13.7	Zhong, 2012
QTL-247	LG9	plant height	87.2	88	0.8	2.68	4.24	26.35	26.3	26.4	Zhong, 2012
QTL-248	LG9	plant height	53.9	55.4	1.5	4.88	8.74	38.75	36.2	41.3	Zhong, 2012
QTL-249	LG4	plant height	22.4	23.4	1	4.22	7.84	21.85	20.7	23	Zhong, 2012
QTL-250	LG9	plant height	45.8	48.4	2.6	4.34	7.7	NA	NA	NA	Zhong, 2012
QTL-251	LG5	plant height	37.8	39.1	1.3	2.92	4.82	22.25	21.8	22.7	Zhong, 2012
QTL-252	LG2	plant height	27.8	29.8	2	2.65	6.43	59.25	51.5	67	Zhong, 2012
QTL-253	LG5	number of nod	41.7	45.6	3.9	4.85	11.84	20.5	14.8	26.2	Zhong, 2012
QTL-254	LG9	Stem internode length	31.9	33.6	1.7	2.71	6.39	NA	NA	NA	Zhong, 2012
QTL-255	LG5	number of nod	29.2	32.4	3.2	5.05	10.63	46.55	16.6	76.5	Zhong, 2012
QTL-256	LG9	number of nod	25.4	27.7	2.3	3.79	8.6	56.15	55.2	57.1	Zhong, 2012
QTL-257	LG9	number of nod	68.4	74.7	6.3	3.1	6.94	56.2	82.2	30.2	Zhong, 2012
QTL-258	LG9	number of nod	55.4	57.5	2.1	6.58	13.77	35.9	35.6	36.2	Zhong, 2012
QTL-259	LG5	number of nod	29.2	32.4	3.2	3.33	6.85	46.55	16.6	76.5	Zhong, 2012
QTL-260	LG5	pod length	29.2	32.4	3.2	15.05	30.19	46.55	16.6	76.5	Zhong, 2012
QTL-261	LG4	pod length	31.4	33.2	1.8	6.47	11.02	26.4	26.4	26.4	Zhong, 2012
QTL-262	LG7	pod length	49.5	52.2	2.7	5.33	9.42	18.75	0	37.5	Zhong, 2012
QTL-263	LG10	pod length				5.04	8.12	31.85	28.2	35.5	Zhong, 2012
QTL-264	LG5	pod length	28.3	29.2	0.9	17.43	20.51	47.9	19.3	76.5	Zhong, 2012
QTL-265	LG10	pod length				8.82	9.36	31.85	28.2	35.5	Zhong, 2012
QTL-266	LG7	pod length	45.6	49.1	3.5	6.64	6.7	38.45	37.8	39.1	Zhong, 2012
QTL-267	LG4	pod length	31	31.2	0.2	6.03	6	26.4	26.4	26.4	Zhong, 2012
QTL-268	LG9	pod length	24	25.4	1.4	4.57	4.46	57.45	57.1	57.8	Zhong, 2012
QTL-269	LG6	pod length	13	14.2	1.2	3.44	3.32	10.55	8	13.1	Zhong, 2012
QTL-270	LG4	pod length	82.2	87.2	5	2.7	2.89	66.6	56.7	76.5	Zhong, 2012
QTL-271	LG4	pod length	78	79.9	1.9	3.72	20.82	66.15	55.8	76.5	Zhong, 2012
QTL-272	LG5	pod length	29.2	32.4	3.2	5.78	15.71	46.55	16.6	76.5	Zhong, 2012
QTL-273	LG9	pod width	19.7	22.8	3.1	10.49	16.69	68.9	59	78.8	Zhong, 2012
QTL-274	LG2	pod width	62.9	63.5	0.6	7.58	11	35.5	35.4	35.6	Zhong, 2012
QTL-275	LG5	pod width	22.7	25.5	2.8	3.5	4.91	76.5	76.5	76.5	Zhong, 2012
QTL-276	LG1	pod width	82.1	83	0.9	3.29	4.62	44.35	43.7	45	Zhong, 2012
QTL-277	LG2	pod width	26.6	27.9	1.3	3.32	8.61	61.65	51.5	71.8	Zhong, 2012
QTL-278	LG1	Seeds per pod	81.9	82.1	0.2	5.99	15.01	NA	NA	NA	Zhong, 2012
QTL-279	LG2	Seeds per pod	19.2	20.8	1.6	5.42	9.57	75.9	74.7	77.1	Zhong, 2012
QTL-280	LG4	Seeds per pod	72	75.8	3.8	3.89	6.87	56.05	54.2	57.9	Zhong, 2012
QTL-281	LG8	Seeds per pod	5.5	8.7	3.2	2.95	5.29	NA	NA	NA	Zhong, 2012
QTL-282	LG5	Seeds per pod	29.2	32.4	3.2	2.83	4.76	46.55	16.6	76.5	Zhong, 2012
QTL-283	LG4	Seeds per pod	78	79.9	1.9	3.34	18.82	66.15	55.8	76.5	Zhong, 2012
QTL-284	LG9	hundred-grain weight	27.7	29	1.3	11.47	16.17	54.35	53.5	55.2	Zhong, 2012
QTL-285	LG2	hundred-grain weight	79.8	82.8	3	7.18	10.47	NA	NA	NA	Zhong, 2012
QTL-286	LG5	hundred-grain weight	29.2	32.4	3.2	6.05	8.07	46.55	16.6	76.5	Zhong, 2012
QTL-287	LG11	hundred-grain weight	38.8	42.1	3.3	5.99	7.86	39.7	30.7	48.7	Zhong, 2012
QTL-288	LG1	hundred-grain weight	87.5	88.1	0.6	5.07	6.8	82.65	50.8	114.5	Zhong, 2012
QTL-289	LG10	hundred-grain weight				4.8	6.21	31.85	28.2	35.5	Zhong, 2012
QTL-290	LG7	hundred-grain weight	15.6	16.8	1.2	3.4	4.95	8.25	0.5	16	Zhong, 2012
QTL-291	LG9	hundred-grain weight	22.8	24	1.2	11.57	15.06	58.4	57.8	59	Zhong, 2012
QTL-292	LG1	hundred-grain weight	86.7	87.5	0.8	8.71	11.47	52.8	50.8	54.8	Zhong, 2012
QTL-293	LG5	hundred-grain weight	22.7	25.5	2.8	6.8	8.58	76.5	76.5	76.5	Zhong, 2012
QTL-294	LG3	hundred-grain weight	91.8	94	2.2	6.7	8.04	33.6	22.6	44.6	Zhong, 2012
QTL-295	LG11	hundred-grain weight	38.8	42.1	3.3	6.06	7.13	39.7	30.7	48.7	Zhong, 2012
QTL-296	LG2	hundred-grain weight	6.8	7.9	1.1	4.95	5.87	61	59	63	Zhong, 2012
QTL-297	LG4	hundred-grain weight	23.4	24.9	1.5	3.35	4.12	21.85	20.7	23	Zhong, 2012
QTL-298	LG6	hundred-grain weight	0	1.8	1.8	2.72	3.08	2	0	4	Zhong, 2012
QTL-299	LG10	hundred-grain weight				3.94	16.48	28.35	24.3	32.4	Zhong, 2012
QTL-300	LG9	hundred-grain weight	33.6	35	1.4	3.1	12.31	50.5	49.2	51.8	Zhong, 2012
QTL-301	LG9	hundred-grain weight	45.8	48.4	2.6	3.25	10.45	NA	NA	NA	Zhong, 2012
QTL-302	LG1	hundred-grain weight	13.2	28.3	15.1	3.1	7.54	NA	NA	NA	Alam et al., 2014
QTL-303	LG1	hundred-grain weight	13.2	28.3	15.1	7.7	18.33	NA	NA	NA	Alam et al., 2014
QTL-304	LG1	hundred-grain weight	13.2	28.3	15.1	6.9	16.21	NA	NA	NA	Alam et al., 2014
QTL-305	LG6	hundred-grain weight	7.2	49	41.8	3.6	9.19	NA	NA	NA	Alam et al., 2014
QTL-306	LG6	hundred-grain weight	49	56.1	7.1	4.4	8.31	NA	NA	NA	Alam et al., 2014
QTL-307	LG6	hundred-grain weight	49	56.1	7.1	5.1	8.6	NA	NA	NA	Alam et al., 2014
QTL-308	LG8	hundred-grain weight	22.6	25.5	2.9	7.7	14	NA	NA	NA	Alam et al., 2014
QTL-309	LG8	hundred-grain weight	20.8	22.6	1.8	5.4	9.68	NA	NA	NA	Alam et al., 2014
QTL-310	LG9	hundred-grain weight	5.4	7.3	1.9	9	19.42	NA	NA	NA	Alam et al., 2014
QTL-311	LG9	hundred-grain weight	7.3	49.7	42.4	11.9	33.72	NA	NA	NA	Alam et al., 2014
QTL-312	LG9	hundred-grain weight	7.3	49.7	42.4	13.4	39.39	NA	NA	NA	Alam et al., 2014
QTL-313	LG2	hundred-grain weight	66.4	45.6	20.8	10.4	22.1	NA	NA	NA	Somta et al., 2015
QTL-314	LG2	hundred-grain weight	0	7.5	7.5	3.6	5.9	NA	NA	NA	Somta et al., 2015
QTL-315	LG4	hundred-grain weight	66.1	109.1	43	3.2	7.8	25.35	24.3	26.4	Somta et al., 2015
QTL-316	LG5	hundred-grain weight	0	42.7	42.7	6.7	11.6	NA	NA	NA	Somta et al., 2015
QTL-317	LG10	hundred-grain weight	0	29.1	29.1	3.4	8.1	16.65	10.7	22.6	Somta et al., 2015
QTL-318	LG5	hundred-grain weight	0	42.7	42.7	3.2	9.1	NA	NA	NA	Somta et al., 2015
QTL-319	LG11	hundred-grain weight	0	31.3	31.3	3.8	13	NA	NA	NA	Somta et al., 2015
QTL-320	LG2	Days to flowering	99	66.4	32.6	7.4	29.6	NA	NA	NA	Somta et al., 2015
QTL-321	LG2	Days to flowering	66.4	45.6	20.8	10.9	29.1	NA	NA	NA	Somta et al., 2015
QTL-322	LG4	Days to flowering	134	156.8	22.8	6.7	18.2	NA	NA	NA	Somta et al., 2015
QTL-323	LG5	Days to flowering	0	42.7	42.7	4.5	32	NA	NA	NA	Somta et al., 2015
QTL-324	LG6	Days to flowering	0	51	51	5	31	NA	NA	NA	Somta et al., 2015
QTL-325	LG2	Days to flowering	99	66.4	32.6	5.1	12.6	NA	NA	NA	Somta et al., 2015
QTL-326	LG2	Days to flowering	66.4	45.6	20.8	4.3	23.2	NA	NA	NA	Somta et al., 2015
QTL-327	LG2	plant height	44.8	50.8	6	3.23	2.86	47.8	44.8	50.8	Liu et al., 2017
QTL-328	LG3	plant height	82.3	83.9	1.6	3.2	3.28	83.1	82.3	83.9	Liu et al., 2017
QTL-329	LG4	plant height	4.9	5.9	1	12.2	12.56	74.6	74.6	74.6	Liu et al., 2017
QTL-330	LG4	plant height	31.5	35.6	4.1	9.89	9.86	74.6	74.6	74.6	Liu et al., 2017
QTL-331	LG5	plant height	39	43.4	4.4	5.83	6.4	41.2	39	43.4	Liu et al., 2017
QTL-332	LG8	plant height	24.4	27	2.6	8.38	8.24	25.7	24.4	27	Liu et al., 2017
QTL-333	LG4	plant height	6.7	8.8	2.1	16.34	19.33	74.6	74.6	74.6	Liu et al., 2017
QTL-334	LG4	plant height	29.8	31.5	1.7	5.82	6.12	74.6	74.6	74.6	Liu et al., 2017
QTL-335	LG5	plant height	39	43.4	4.4	8.6	10.18	41.2	39	43.4	Liu et al., 2017
QTL-336	LG8	plant height	20.3	22.1	1.8	5.09	5.21	21.2	20.3	22.1	Liu et al., 2017
QTL-337	LG4	plant height	3.6	4.9	1.3	4.41	6.09	74.6	74.6	74.6	Liu et al., 2017
QTL-338	LG4	plant height	19	26.9	7.9	7.19	9.91	74.6	74.6	74.6	Liu et al., 2017
QTL-339	LG5	plant height	39	43.4	4.4	10.59	13.88	41.2	39	43.4	Liu et al., 2017
QTL-340	LG4	plant height	3.6	4.9	1.3	3.9	6.09	74.6	74.6	74.6	Liu et al., 2017
QTL-341	LG5	plant height	39	43.4	4.4	10.77	20.06	41.2	39	43.4	Liu et al., 2017
QTL-342	LG8	plant height	50.6	55.2	4.6	3.41	4.86	52.9	50.6	55.2	Liu et al., 2017
QTL-343	LG4	plant height index	3.6	4.9	1.3	4.05	7.85	74.6	74.6	74.6	Liu et al., 2017
QTL-344	LG4	plant height index	26.9	28.4	1.5	13.42	21.6	74.6	74.6	74.6	Liu et al., 2017
QTL-345	LG2	maximum leaf area	13.3	19.6	6.3	5.48	7.69	16.45	13.3	19.6	Liu et al., 2017
QTL-346	LG3	maximum leaf area	81.7	82.3	0.6	2.74	3.49	82	81.7	82.3	Liu et al., 2017
QTL-347	LG4	maximum leaf area	6.7	8.8	2.1	11.61	17.65	74.6	74.6	74.6	Liu et al., 2017
QTL-348	LG8	maximum leaf area	24.4	27	2.6	3.51	4.38	25.7	24.4	27	Liu et al., 2017
QTL-349	LG11	maximum leaf area	7.1	13.2	6.1	2.9	4.93	10.15	7.1	13.2	Liu et al., 2017
QTL-350	LG2	maximum leaf area	13.3	19.6	6.3	4.25	6.97	16.45	13.3	19.6	Liu et al., 2017
QTL-351	LG3	maximum leaf area	83.9	85.2	1.3	3.13	4.39	84.55	83.9	85.2	Liu et al., 2017
QTL-352	LG4	maximum leaf area	6.7	8.8	2.1	12.52	20.59	74.6	74.6	74.6	Liu et al., 2017
QTL-353	LG2	maximum leaf area	13.3	19.6	6.3	4.94	7.94	16.45	13.3	19.6	Liu et al., 2017
QTL-354	LG4	maximum leaf area	8.8	10.9	2.1	5.96	10.34	74.6	74.6	74.6	Liu et al., 2017
QTL-355	LG2	maximum leaf area	13.3	19.6	6.3	4.2	7.11	16.45	13.3	19.6	Liu et al., 2017
QTL-356	LG4	maximum leaf area	8.8	10.9	2.1	3.37	5.63	74.6	74.6	74.6	Liu et al., 2017
QTL-357	LG2	biomass	13.3	15.6	2.3	3.74	4.4	14.45	13.3	15.6	Liu et al., 2017
QTL-358	LG3	biomass	81.7	82.3	0.6	3.31	3.78	82	81.7	82.3	Liu et al., 2017
QTL-359	LG4	biomass	4.9	5.9	1	10.16	12.01	74.6	74.6	74.6	Liu et al., 2017
QTL-360	LG4	biomass	29.8	31.5	1.7	5.02	5.71	74.6	74.6	74.6	Liu et al., 2017
QTL-361	LG8	biomass	29.6	35.3	5.7	12.5	15.82	32.45	29.6	35.3	Liu et al., 2017
QTL-362	LG2	biomass	44.8	50.8	6	3.07	3.19	47.8	44.8	50.8	Liu et al., 2017
QTL-363	LG3	biomass	83.9	85.2	1.3	3.44	3.52	84.55	83.9	85.2	Liu et al., 2017
QTL-364	LG4	biomass	8.8	10.9	2.1	22.16	29.45	74.6	74.6	74.6	Liu et al., 2017
QTL-365	LG8	biomass	29.6	35.3	5.7	10.89	13.75	32.45	29.6	35.3	Liu et al., 2017
QTL-366	LG4	biomass	5.9	6.7	0.8	4.82	7.44	74.6	74.6	74.6	Liu et al., 2017
QTL-367	LG4	biomass	8.8	10.9	2.1	3.83	5.75	74.6	74.6	74.6	Liu et al., 2017
QTL-368	LG6	biomass	89.3	99.5	10.2	2.9	5.31	94.4	89.3	99.5	Liu et al., 2017
QTL-369	LG8	biomass index	27	29.6	2.6	4	7.11	28.3	27	29.6	Liu et al., 2017
QTL-370	LG8	biomass index	29.6	35.3	5.7	3.2	5.64	32.45	29.6	35.3	Liu et al., 2017
QTL-371	LG8	Relative leaf water content	12.8	20.3	7.5	4.02	7.82	16.55	12.8	20.3	Liu et al., 2017
QTL-372	LG10	Relative leaf water content	50	52.2	2.2	3.62	8.44	51.1	50	52.2	Liu et al., 2017
QTL-373	LG4	Relative leaf water content	29.8	31.5	1.7	3.54	6.64	74.6	74.6	74.6	Liu et al., 2017
QTL-374	LG4	Relative leaf water content	0	3.6	3.6	5.19	9.05	71.25	67.9	74.6	Liu et al., 2017
QTL-375	LG8	Relative leaf water content	29.6	35.3	5.7	9.18	14.59	32.45	29.6	35.3	Liu et al., 2017
QTL-376	LG8	Relative leaf water content	20.3	22.1	1.8	4.57	9.47	21.2	20.3	22.1	Liu et al., 2017
QTL-377	LG4	Initial flowering time	5.9	6.7	0.8	5.5	12.52	74.6	74.6	74.6	Liu et al., 2017
QTL-378	LG4	Initial flowering time	31.5	35.6	4.1	5.96	14.02	74.6	74.6	74.6	Liu et al., 2017
QTL-379	LG4	Initial flowering time	5.9	6.7	0.8	6.26	14.2	74.6	74.6	74.6	Liu et al., 2017
QTL-380	LG4	Initial flowering time	31.5	35.6	4.1	5.88	13.64	74.6	74.6	74.6	Liu et al., 2017
QTL-381	LG4	Initial flowering time	8.8	10.9	2.1	8.96	19.2	74.6	74.6	74.6	Liu et al., 2017
QTL-382	LG4	Initial flowering time	31.5	35.6	4.1	4.02	8.71	74.6	74.6	74.6	Liu et al., 2017
QTL-383	LG4	Initial flowering time	6.7	8.8	2.1	14.54	28.38	74.6	74.6	74.6	Liu et al., 2017
QTL-384	LG4	Initial flowering time	31.5	35.6	4.1	5.05	9.56	74.6	74.6	74.6	Liu et al., 2017
QTL-385	LG8	Yield per block	29.6	35.3	5.7	8.22	15.76	32.45	29.6	35.3	Liu et al., 2017
QTL-386	LG1	Yield per block	2.7	7.5	4.8	3.35	6.64	5.1	2.7	7.5	Liu et al., 2017
QTL-387	LG4	Yield per block	5.9	6.7	0.8	5.58	9.07	74.6	74.6	74.6	Liu et al., 2017
QTL-388	LG8	Yield per block	29.6	35.3	5.7	5.96	9.44	32.45	29.6	35.3	Liu et al., 2017
QTL-389	LG8	yield index	29.6	35.3	5.7	3.56	6.99	32.45	29.6	35.3	Liu et al., 2017
QTL-390	LG8	plant height	0	11.8	11.8	3	8.49	5.9	0	11.8	Wang et al., 2017
QTL-391	LG4	Young stem color	550	613.7	63.7	3	66.64	NA	NA	NA	Wang et al., 2017
QTL-392	LG4	Main stem color	504.5	550	45.5	3	38.68	NA	NA	NA	Wang et al., 2017
QTL-393	LG2	Podding habit	167.2	192.7	25.5	3	60.32	179.95	167.2	192.7	Wang et al., 2017
QTL-394	LG4	Podding habit	320	383.4	63.4	3	67.82	NA	NA	NA	Wang et al., 2017
QTL-395	LG4	Podding habit	320	383.4	63.4	3	80.36	NA	NA	NA	Wang et al., 2017
QTL-396	LG1	Growth habit	107	110.6	3.6	3	58.32	108.8	107	110.6	Wang et al., 2017
QTL-397	LG2	Growth habit	167.2	192.7	25.5	3	99.51	179.95	167.2	192.7	Wang et al., 2017
QTL-398	LG2	Growth habit	192.7	246.6	5.9	3	99.51	219.65	192.7	246.6	Wang et al., 2017
QTL-399	LG10	Growth habit	320	383.4	63.4	3	99.51	108.35	99.4	117.3	Wang et al., 2017
QTL-400	LG10	Trilobate leaf shape	99.4	117.3	31	3	99.51	108.35	99.4	117.3	Wang et al., 2017
QTL-401	LG2	Mature leaf color	123.5	191.3	66.8	3	54.96	49.6	47.1	52.1	Wang et al., 2017
QTL-402	LG2	Mature leaf color	0	52.1	52.1	3	87.35	219.65	192.7	246.6	Wang et al., 2017
QTL-403	LG4	Mature leaf color	192.7	246.6	5.9	3	69.06	NA	NA	NA	Wang et al., 2017
QTL-404	LG4	Mature leaf color	123.5	191.3	66.8	3	87.2	NA	NA	NA	Wang et al., 2017
QTL-405	LG11	hundred-grain weight	0	18.6	18.6	2.8	8.11	NA	52.2	NA	Singh et al., 2017
QTL-406	LG1	hundred-grain weight	1.7	52.3	50.6	3.6	8	26.15	1.7	50.6	Singh et al., 2017
QTL-407	LG10	hundred-grain weight	0	23.4	23.4	3.2	9.44	NA	23.4	NA	Singh et al., 2017
QTL-408	LG2	hundred-grain weight	0	17	17	3.4	12.55	NA	17	NA	Singh et al., 2017
QTL-409	LG1	hundred-grain weight	0	1.7	1.7	4.5	8.12	26.15	1.7	50.6	Singh et al., 2017
QTL-410	LG9	Pod number per plant	0	15.2	15.2	4.8	6	31.4	15.2	47.6	Singh et al., 2017
QTL-411	LG1	Pod number per plant	0	1.7	1.7	3.6	5.12	26.15	1.7	50.6	Singh et al., 2017
QTL-412	LG3	Seeds per pod	0	18.6	18.6	3.8	11.8	NA	NA	NA	Singh et al., 2017
QTL-413	LG9	Seeds per pod	62.8	116.3	53.5	3.7	7.12	50.45	47.6	53.3	Singh et al., 2017
QTL-414	LG2	Seeds per pod	0	17	17	4.5	6.49	NA	17	NA	Singh et al., 2017
QTL-415	LG6	Days to burgeon	130.2	134.9	4.7	3.97	7.08	132.55	130.2	134.9	Ma, 2019
QTL-416	LG6	Days to burgeon	130.2	134.9	4.7	4.02	7.44	132.55	130.2	134.9	Ma, 2019
QTL-417	LG6	trifoliolate stage	56.1	59.3	3.2	4.1	7.78	57.7	56.1	59.3	Ma, 2019
QTL-418	LG6	trifoliolate stage	56.1	59.3	3.2	5.43	9.75	57.7	56.1	59.3	Ma, 2019
QTL-419	LG6	Days to seedling emergence to three leaves	56.1	59.3	3.2	4.6	8.8	57.7	56.1	59.3	Ma, 2019
QTL-420	LG6	Days to seedling emergence to three leaves	56.1	59.3	3.2	5.92	10.83	57.7	56.1	59.3	Ma, 2019
QTL-421	LG9	branching stage	27.4	30.9	3.5	8.53	15.93	29.15	27.4	30.9	Ma, 2019
QTL-422	LG11	branching stage	62	66.8	4.8	6.28	11.3	64.4	62	66.8	Ma, 2019
QTL-423	LG9	Days to seedling emergence to branching	27.4	30.9	3.5	5.59	10.49	29.15	27.4	30.9	Ma, 2019
QTL-424	LG11	Days to seedling emergence to branching	62	66.8	4.8	6.42	11.56	64.4	62	66.8	Ma, 2019
QTL-425	LG9	Days to trifoliolate to branching	30.9	32	1.1	2.25	4.16	31.45	30.9	32	Ma, 2019
QTL-426	LG6	Days to trifoliolate to branching	56.1	59.3	3.2	5.16	9.31	57.7	56.1	59.3	Ma, 2019
QTL-427	LG1	Initial flowering time	7.5	21.4	13.9	3.39	6.02	14.45	7.5	21.4	Ma, 2019
QTL-428	LG2	Initial flowering time	33.1	34.4	1.3	6.07	9.75	33.75	33.1	34.4	Ma, 2019
QTL-429	LG7	Initial flowering time	13	15.3	2.3	2.46	3.79	14.15	13	15.3	Ma, 2019
QTL-430	LG2	Initial flowering time	34.4	39.7	5.3	5.13	9.23	37.05	34.4	39.7	Ma, 2019
QTL-431	LG1	Days to seedling emergence to initial flowering	7.5	21.4	13.9	2.77	4.76	14.45	7.5	21.4	Ma, 2019
QTL-432	LG2	Days to seedling emergence to initial flowering	31.4	33.1	1.7	4.38	8.02	32.25	31.4	33.1	Ma, 2019
QTL-433	LG6	Days to seedling emergence to initial flowering	130.2	134.9	4.7	2.21	3.6	132.55	130.2	134.9	Ma, 2019
QTL-434	LG2	Days to seedling emergence to initial flowering	34.4	39.7	5.3	5.06	9.23	37.05	34.4	39.7	Ma, 2019
QTL-435	LG2	Days to trifoliolate to initial flowering	54.3	56.1	1.8	2.68	2.04	55.2	54.3	56.1	Ma, 2019
QTL-436	LG6	Days to trifoliolate to initial flowering	34.4	39.7	5.3	3.5	6.61	37.05	34.4	39.7	Ma, 2019
QTL-437	LG7	Days to trifoliolate to initial flowering	0	2.9	2.9	2.17	3.7	1.45	0	2.9	Ma, 2019
QTL-438	LG1	Days to branching to initial flowering	7.5	21.4	13.9	3.57	6.4	14.45	7.5	21.4	Ma, 2019
QTL-439	LG2	Days to branching to initial flowering	15.6	19.6	4	3.46	5.55	17.6	15.6	19.6	Ma, 2019
QTL-440	LG9	Days to branching to initial flowering	30.9	32	1.1	4.56	7.27	31.45	30.9	32	Ma, 2019
QTL-441	LG2	Days to branching to initial flowering	34.4	39.7	5.3	4.77	8.72	37.05	34.4	39.7	Ma, 2019
QTL-442	LG2	Days to flowering	3.7	6.3	2.6	2.86	4.95	5	3.7	6.3	Ma, 2019
QTL-443	LG11	Days to flowering	0	1.9	1.9	4.5	7.7	0.95	0	1.9	Ma, 2019
QTL-444	LG2	Days to flowering	0	1.8	1.8	2.02	3.31	0.9	0	1.8	Ma, 2019
QTL-445	LG11	Days to flowering	66.8	70.6	3.8	4.93	8.83	68.7	66.8	70.6	Ma, 2019
QTL-446	LG2	Days to seedling emergence to flowering	3.7	6.3	2.6	2.51	4.25	5	3.7	6.3	Ma, 2019
QTL-447	LG11	Days to seedling emergence to flowering	0	1.9	1.9	3.87	6.64	0.95	0	1.9	Ma, 2019
QTL-448	LG2	Days to seedling emergence to flowering	0	1.8	1.8	2.03	3.3	0.9	0	1.8	Ma, 2019
QTL-449	LG11	Days to seedling emergence to flowering	66.8	70.6	3.8	5.28	9.42	68.7	66.8	70.6	Ma, 2019
QTL-450	LG11	Days to trifoliolate to flowering	0	1.9	1.9	2.7	4.97	0.95	0	1.9	Ma, 2019
QTL-451	LG11	Days to trifoliolate to flowering	66.8	70.6	3.8	2.48	4.62	68.7	66.8	70.6	Ma, 2019
QTL-452	LG2	Days to branching to flowering	3.7	6.3	2.6	2.72	4.78	5	3.7	6.3	Ma, 2019
QTL-453	LG11	Days to branching to flowering	0	1.9	1.9	3.73	6.45	0.95	0	1.9	Ma, 2019
QTL-454	LG11	Days to branching to flowering	66.8	70.6	3.8	2.04	3.79	68.7	66.8	70.6	Ma, 2019
QTL-455	LG1	Days to initial flowering to flowering	7.5	21.4	13.9	2.37	5.06	14.45	7.5	21.4	Ma, 2019
QTL-456	LG11	Days to initial flowering to flowering	0	1.9	1.9	2.93	5.26	0.95	0	1.9	Ma, 2019
QTL-457	LG2	Days to initial flowering to flowering	33.1	34.4	1.3	3.38	6.33	33.75	33.1	34.4	Ma, 2019
QTL-458	LG11	Days to maturity	0	1.9	1.9	4.99	8.77	0.95	0	1.9	Ma, 2019
QTL-459	LG11	Days to maturity	66.8	70.6	3.8	3.75	7.39	68.7	66.8	70.6	Ma, 2019
QTL-460	LG11	Days to maturity	0	1.9	1.9	2.16	3.91	0.95	0	1.9	Ma, 2019
QTL-461	LG11	Days to initial flowering to maturity	66.8	70.6	3.8	3.75	7.39	68.7	66.8	70.6	Ma, 2019
QTL-462	LG2	Days to initial flowering to maturity	34.4	39.7	5.3	3.57	6.69	37.05	34.4	39.7	Ma, 2019
QTL-463	LG11	Days to branching to maturity	0	1.9	1.9	4.56	8.05	0.95	0	1.9	Ma, 2019
QTL-464	LG11	Days to trifoliolate to maturity	0	1.9	1.9	4.32	7.8	0.95	0	1.9	Ma, 2019
QTL-465	LG11	Days to seedling emergence to maturity	0	1.9	1.9	4.7	8.29	0.95	0	1.9	Ma, 2019
QTL-466	LG11	Days to seedling emergence to maturity	66.8	70.6	3.8	3.9	7.64	68.7	66.8	70.6	Ma, 2019
QTL-467	LG1	plant height	39.2	41.1	1.9	5.61	9.48	40.15	39.2	41.1	Chen, 2020b
QTL-468	LG1	plant height	39.2	41.1	1.9	9.06	14.52	40.15	39.2	41.1	Chen, 2020b
QTL-469	LG1	plant height	39.2	41.1	1.9	9.63	15.42	40.15	39.2	41.1	Chen, 2020b
QTL-470	LG10	Branch number per plant	13.7	18.2	4.5	4.01	6.56	15.95	13.7	18.2	Chen, 2020b
QTL-471	LG11	Branch number per plant	0	1.9	1.9	4.84	7.9	0.95	0	1.9	Chen, 2020b
QTL-472	LG10	Branch number per plant	3.9	8.3	4.4	3.01	4.97	6.1	3.9	8.3	Chen, 2020b
QTL-473	LG11	Branch number per plant	0	1.9	1.9	3.68	6.07	0.95	0	1.9	Chen, 2020b
QTL-474	LG10	Branch number per plant	3.9	8.3	4.4	3.81	6.59	6.1	3.9	8.3	Chen, 2020b
QTL-475	LG11	Branch number per plant	0	1.9	1.9	4.16	6.83	0.95	0	1.9	Chen, 2020b
QTL-476	LG2	Pod number per plant	3.7	6.3	2.6	9.77	16.55	5	3.7	6.3	Chen, 2020b
QTL-477	LG2	Pod number per plant	1.8	3.7	1.9	7.84	13.35	2.75	1.8	3.7	Chen, 2020b
QTL-478	LG2	Pod number per plant	3.7	6.3	2.6	7.68	13.14	5	3.7	6.3	Chen, 2020b
QTL-479	LG4	Seeds per pod	0	3.6	3.6	10.83	17.18	71.25	67.9	74.6	Chen, 2020b
QTL-480	LG7	Seeds per pod	33.6	38	4.4	3.2	4.65	NA	NA	NA	Chen, 2020b
QTL-481	LG4	Seeds per pod	0	3.6	3.6	9.21	15.24	71.25	67.9	74.6	Chen, 2020b
QTL-482	LG7	Seeds per pod	39.9	41.7	1.8	3.73	5.62	40.8	39.9	41.7	Chen, 2020b
QTL-483	LG4	Seeds per pod	0	3.6	3.6	8.91	14.81	71.25	67.9	74.6	Chen, 2020b
QTL-484	LG7	Seeds per pod	39.9	41.7	1.8	4.06	6.26	40.8	39.9	41.7	Chen, 2020b
QTL-485	LG4	pod length	124.1	126.7	2.6	3.66	6.49	92.8	91.5	94.1	Chen, 2020b
QTL-486	LG4	pod length	124.1	126.7	2.6	3.05	5.47	92.8	91.5	94.1	Chen, 2020b
QTL-487	LG4	pod length	122.6	124.1	1.5	5.02	8.72	90.75	90	91.5	Chen, 2020b
QTL-488	LG4	pod length	83.8	85.5	1.7	3.19	5.43	74.6	74.6	74.6	Chen, 2020b
QTL-489	LG10	pod width	52.2	54.3	2.1	12.81	23.76	53.25	52.2	54.3	Chen, 2020b
QTL-490	LG10	pod width	60.8	61.8	1	5.59	9.69	61.3	60.8	61.8	Chen, 2020b
QTL-491	LG10	pod width	52.2	54.3	2.1	4.15	7.39	53.25	52.2	54.3	Chen, 2020b
QTL-492	LG10	pod width	52.2	54.3	2.1	10.53	19.69	53.25	52.2	54.3	Chen, 2020b
QTL-493	LG10	pod width	60.8	61.8	1	5.46	9.62	61.3	60.8	61.8	Chen, 2020b
QTL-494	LG5	seed length	25.8	28.5	2.7	4.45	7.43	27.15	25.8	28.5	Chen, 2020b
QTL-495	LG10	seed length	0	3.9	3.9	3.37	5.96	1.95	0	3.9	Chen, 2020b
QTL-496	LG5	seed length	22.6	25.8	3.2	6.04	10.08	24.2	22.6	25.8	Chen, 2020b
QTL-497	LG5	seed length	28.5	37.1	8.6	5.38	10.02	32.8	28.5	37.1	Chen, 2020b
QTL-498	LG11	seed length	55.8	59.4	3.6	3.88	6.52	57.6	55.8	59.4	Chen, 2020b
QTL-499	LG3	seed width	0	1.9	1.9	3.07	4.61	0.95	0	1.9	Chen, 2020b
QTL-500	LG10	seed width	25.6	33.6	8	9.03	16.19	23.7	13.8	33.6	Chen, 2020b
QTL-501	LG9	seed width	14.1	16.2	2.1	3.26	5.18	15.15	14.1	16.2	Chen, 2020b
QTL-502	LG10	seed width	18.2	25.6	7.4	5.27	8.92	21.9	18.2	25.6	Chen, 2020b
QTL-503	LG2	seed width	31.4	33.1	1.7	3.06	4.89	32.25	31.4	33.1	Chen, 2020b
QTL-504	LG10	seed width	46.7	50	3.3	5.49	8.96	48.35	46.7	50	Chen, 2020b
QTL-505	LG6	Seed diameter	59.3	61.9	2.6	4.32	6.66	60.6	59.3	61.9	Chen, 2020b
QTL-506	LG10	Seed diameter	25.6	33.6	8	8.53	14.95	23.7	13.8	33.6	Chen, 2020b
QTL-507	LG10	Seed diameter	25.6	33.6	8	5.31	9.94	23.7	13.8	33.6	Chen, 2020b
QTL-508	LG10	Seed diameter	25.6	33.6	8	7.42	13.6	23.7	13.8	33.6	Chen, 2020b
QTL-509	LG6	Seed perimeter	56.1	59.3	3.2	15.04	23.38	57.7	56.1	59.3	Chen, 2020b
QTL-510	LG7	Seed perimeter	13	15.3	2.3	3.99	5.68	14.15	13	15.3	Chen, 2020b
QTL-511	LG6	Seed perimeter	56.1	59.3	3.2	10.18	16.66	57.7	56.1	59.3	Chen, 2020b
QTL-512	LG6	Seed perimeter	56.1	59.3	3.2	12.52	20.37	57.7	56.1	59.3	Chen, 2020b
QTL-513	LG7	Seed perimeter	13	15.3	2.3	3.11	4.65	14.15	13	15.3	Chen, 2020b
QTL-514	LG6	hundred-grain weight	59.3	61.9	2.6	4.79	8.38	60.6	59.3	61.9	Chen, 2020b
QTL-515	LG7	hundred-grain weight	0	2.9	2.9	3.07	5.03	1.45	0	2.9	Chen, 2020b
QTL-516	LG6	hundred-grain weight	64.2	66.3	2.1	5.34	8.55	65.25	64.2	66.3	Chen, 2020b
QTL-517	LG7	hundred-grain weight	0	2.9	2.9	4.92	7.71	1.45	0	2.9	Chen, 2020b
QTL-518	LG6	hundred-grain weight	59.3	61.9	2.6	7.46	7.65	60.6	59.3	61.9	Chen, 2020b
QTL-519	LG7	hundred-grain weight	0	2.9	2.9	9.31	4.89	1.45	0	2.9	Chen, 2020b
QTL-520	LG2	Yield per plant	3.7	6.3	2.6	6.7	11.71	5	3.7	6.3	Chen, 2020b
QTL-521	LG2	Yield per plant	1.8	3.7	1.9	4.91	8.41	2.75	1.8	3.7	Chen, 2020b
QTL-522	LG2	Yield per plant	3.7	6.3	2.6	4.14	7.38	5	3.7	6.3	Chen, 2020b
QTL-523	LG4	Control root length	60.99	61.39	0.4	3.33	6.63	74.6	74.6	74.6	Chen, 2020a
QTL-524	LG5	Control root length	22.55	25.8	3.25	4.71	7.93	24.2	22.6	25.8	Chen, 2020a
QTL-525	LG4	Treatment root length	68.02	70.21	2.19	3.75	6.64	74.6	74.6	74.6	Chen, 2020a
QTL-526	LG11	Treatment root length	18.51	39.43	20.92	4.38	8.55	37.15	18.5	55.8	Chen, 2020a
QTL-527	LG6	Relative root length	48.6	51.5	2.9	3.27	5.94	50.05	48.6	51.5	Chen, 2020a
QTL-528	LG11	Relative root length	18.51	39.43	20.92	4.99	12.3	37.15	18.5	55.8	Chen, 2020a
QTL-529	LG3	notched leaf shape	21.865	22.438	0.573	30.6881	50.0123	22.1515	21.865	22.438	Wang, 2020
QTL-530	LG3	notched leaf shape	21.865	22.438	0.573	66.0814	27.7235	22.1515	21.865	22.438	Wang, 2020
QTL-531	LG3	notched leaf shape	22.783	23.241	0.458	47.0168	16.7406	23.012	22.783	23.241	Wang, 2020
QTL-532	LG3	notched leaf shape	23.529	24.107	0.578	56.236	19.4748	23.818	23.529	24.107	Wang, 2020
QTL-533	LG3	notched leaf shape	24.107	24.621	0.514	56.5102	19.4748	24.364	24.107	24.621	Wang, 2020
QTL-534	LG3	notched leaf shape	21.865	22.438	0.573	43.9846	69.4775	22.1515	21.865	22.438	Wang, 2020
QTL-535	LG3	notched leaf shape	21.865	22.438	0.573	12.0682	29.0658	22.1515	21.865	22.438	Wang, 2020
QTL-536	LG3	notched leaf shape	23.241	23.529	0.288	7.36511	15.8189	23.385	23.241	23.529	Wang, 2020
QTL-537	LG3	notched leaf shape	24.107	24.621	0.514	10.3322	17.4206	24.364	24.107	24.621	Wang, 2020
QTL-538	LG10	notched leaf shape	70.438	71.759	1.321	7.48728	12.1646	71.0985	70.438	71.759	Wang, 2020
QTL-539	LG10	notched leaf shape	72.904	74.049	1.145	7.47586	14.542	73.4765	72.904	74.049	Wang, 2020
QTL-540	LG10	curled leaf shape	63.924	65.36	1.436	19.0534	39.6804	64.642	63.924	65.36	Wang, 2020
QTL-541	LG10	curled leaf shape	63.924	65.36	1.436	23.3758	45.4721	64.642	63.924	65.36	Wang, 2020
QTL-542	LG2	plant height	34.059	35.152	1.093	10.3836	15.5039	34.6055	34.059	35.152	Wang, 2020
QTL-543	LG3	plant height	36.148	37.069	0.921	17.435	28.5799	36.6085	36.148	37.069	Wang, 2020
QTL-544	LG10	number of branch	63.924	65.36	1.436	6.8642	16.5261	64.642	63.924	65.36	Wang, 2020
QTL-545	LG3	pod length	37.069	37.356	0.287	3.6685	9.2841	37.2125	37.069	37.356	Wang, 2020
QTL-546	LG5	pod length	113.085	113.373	0.288	6.4089	13.3905	113.229	113.085	113.373	Wang, 2020
QTL-547	LG7	pod length	21.976	22.263	0.287	3.7872	7.6042	22.1195	21.976	22.263	Wang, 2020
QTL-548	LG1	pod width	52.903	60.918	8.015	3.3784	5.4696	56.9105	52.903	60.918	Wang, 2020
QTL-549	LG5	pod width	113.085	113.373	0.288	4.4341	7.2938	113.229	113.085	113.373	Wang, 2020
QTL-550	LG7	pod width	14.121	14.699	0.578	7.1853	12.3052	14.41	14.121	14.699	Wang, 2020
QTL-551	LG11	pod width	62.282	62.626	0.344	6.5035	10.9862	62.454	62.282	62.626	Wang, 2020
QTL-552	LG10	Seeds per pod	71.759	72.904	1.145	5.4091	13.3381	72.3315	71.759	72.904	Wang, 2020
QTL-553	LG10	Seeds per pod	63.924	65.36	1.436	15.6396	33.6625	64.642	63.924	65.36	Wang, 2020
QTL-554	LG4	testa color	31.056	33.14	2.084	23.7106	39.8326	32.098	31.056	33.14	Wang, 2020
QTL-555	LG4	testa color	31.056	33.14	2.084	18.7838	36.6356	32.098	31.056	33.14	Wang, 2020
QTL-556	LG4	testa color	31.056	33.14	2.084	21.2936	39.3692	32.098	31.056	33.14	Wang, 2020
QTL-557	LG4	testa color	31.056	33.14	2.084	49.8372	69.6603	32.098	31.056	33.14	Wang, 2020
QTL-558	LG4	testa color	31.056	33.14	2.084	43.8859	67.3913	32.098	31.056	33.14	Wang, 2020
QTL-559	LG4	testa color	33.428	34.597	1.169	11.003	15.7556	34.0125	33.428	34.597	Wang, 2020
QTL-560	LG4	testa color	33.428	34.597	1.169	14.9203	24.3754	34.0125	33.428	34.597	Wang, 2020
QTL-561	LG4	testa color	20.838	22.309	1.471	7.2873	12.003	21.5735	20.838	22.309	Wang, 2020
QTL-562	LG5	testa color	41.864	43.033	1.169	5.0034	6.5816	42.4485	41.864	43.033	Wang, 2020
QTL-563	LG6	testa color	127.116	127.988	0.872	9.0564	15.3169	127.552	127.116	127.988	Wang, 2020
QTL-564	LG6	testa color	127.116	127.988	0.872	5.5693	7.9712	127.552	127.116	127.988	Wang, 2020
QTL-565	LG6	testa color	127.116	127.988	0.872	4.9685	3.8666	127.552	127.116	127.988	Wang, 2020
QTL-566	LG6	testa color	127.116	127.988	0.872	6.7892	5.768	127.552	127.116	127.988	Wang, 2020
QTL-567	LG6	testa color	127.116	127.988	0.872	5.9309	7.7439	127.552	127.116	127.988	Wang, 2020
QTL-568	LG5	testa luster	41.864	43.033	1.169	28.0221	54.9443	42.4485	41.864	43.033	Wang, 2020
QTL-569	LG5	testa luster	41.864	43.033	1.169	28.1282	55.4299	42.4485	41.864	43.033	Wang, 2020
QTL-570	LG5	testa luster	41.864	43.033	1.169	35.0407	60.6188	42.4485	41.864	43.033	Wang, 2020
QTL-571	LG5	testa luster	40.393	41.864	1.471	32.1161	60.9897	41.1285	40.393	41.864	Wang, 2020
QTL-572	LG5	Seed distribution density	101.743	102.03	0.287	3.1697	4.7479	101.886	101.743	102.03	Wang, 2020
QTL-573	LG7	Seed distribution density	24.298	25.769	1.471	3.9284	6.0221	25.0335	24.298	25.769	Wang, 2020
QTL-574	LG10	Seed distribution density	61.175	63.924	2.749	6.2995	15.4901	62.5495	61.175	63.924	Wang, 2020
QTL-575	LG10	Seed distribution density	63.924	65.36	1.436	20.4404	39.4171	64.642	63.924	65.36	Wang, 2020
QTL-576	LG1	Initial flowering time	99.67	100.248	0.578	3.785	4.8008	99.959	99.67	100.248	Wang, 2020
QTL-577	LG2	Initial flowering time	31.959	34.059	2.1	3.7652	4.8165	33.009	31.959	34.059	Wang, 2020
QTL-578	LG3	Initial flowering time	36.148	37.069	0.921	25.6816	46.1304	36.6085	36.148	37.069	Wang, 2020
QTL-579	LG3	Initial flowering time	37.356	37.93	0.574	15.7293	29.4201	37.643	37.356	37.93	Wang, 2020
QTL-580	LG5	Initial flowering time	51.099	52.269	1.17	3.5737	1.711	51.684	51.099	52.269	Wang, 2020
QTL-581	LG10	Initial flowering time	75.995	77.725	1.73	8.65729	11.8954	76.86	75.995	77.725	Wang, 2020
QTL-582	LG10	Initial flowering time	78.641	79.448	0.807	8.54095	14.7264	79.0445	78.641	79.448	Wang, 2020
QTL-583	LG2	chlorophyll content	31.959	34.059	2.1	3.374	4.2159	33.009	31.959	34.059	Wang, 2020
QTL-584	LG3	chlorophyll content	37.356	37.93	0.574	8.3891	16.5578	37.643	37.356	37.93	Wang, 2020
QTL-585	LG3	chlorophyll content	37.356	37.93	0.574	11.0694	15.3255	37.643	37.356	37.93	Wang, 2020
QTL-586	LG10	chlorophyll content	63.924	65.36	1.436	9.1277	18.5792	64.642	63.924	65.36	Wang, 2020
QTL-587	LG10	chlorophyll content	63.924	65.36	1.436	19.3676	30.2239	64.642	63.924	65.36	Wang, 2020
QTL-588	LG5	hundred-grain weight	102.605	102.892	0.287	4.4855	8.7266	102.749	102.605	102.892	Wang, 2020
QTL-589	LG7	hundred-grain weight	14.699	20.82	6.121	8.7271	18.1767	17.7595	14.699	20.82	Wang, 2020
QTL-590	LG11	hundred-grain weight	61.238	62.282	1.044	4.9576	9.8324	61.76	61.238	62.282	Wang, 2020
QTL-591	LG10	Seed diameter	63.924	65.36	1.436	3.4239	7.8136	64.642	63.924	65.36	Wang, 2020
QTL-592	LG6	Young stem color	127.116	127.988	0.872	34.5051	59.9423	127.552	127.116	127.988	Wang, 2020
QTL-593	LG1	Young stem color	36.34	43.19	6.85	24.38	2.79	39.765	36.34	43.19	Ye et al., 2021
QTL-594	LG4	Young stem color	37.25	41.38	4.13	97.25	90.07	39.315	37.25	41.38	Ye et al., 2021
QTL-595	LG6	Young stem color	72.08	86.28	14.2	4.97	1.32	79.18	72.08	86.28	Ye et al., 2021
QTL-596	LG3	Days to flowering	23.4	29.12	5.72	24.31	53.67	26.26	23.4	29.12	Ye et al., 2021
QTL-597	LG10	Days to flowering	9.08	23.66	14.58	2.19	3.42	16.37	9.08	23.66	Ye et al., 2021
QTL-598	LG3	Days to maturity	23.4	29.12	5.72	20.78	45.6	26.26	23.4	29.12	Ye et al., 2021
QTL-599	LG6	Days to maturity	49.66	70.22	20.56	2.44	3.53	59.94	49.66	70.22	Ye et al., 2021
QTL-600	LG1	plant height	36.34	43.19	6.85	3.24	6.57	39.765	36.34	43.19	Ye et al., 2021
QTL-601	LG3	plant height	23.4	29.12	5.72	7.42	13.6	26.26	23.4	29.12	Ye et al., 2021
QTL-602	LG3	plant height	30.6	31.34	0.74	15.97	31.57	30.97	30.6	31.34	Ye et al., 2021
QTL-603	LG7	plant height	9.36	14.67	5.31	2.06	3.26	12.015	9.36	14.67	Ye et al., 2021
QTL-604	LG10	plant height	9.08	23.66	14.58	2.51	3.87	16.37	9.08	23.66	Ye et al., 2021
QTL-605	LG3	number of nod	23.4	29.12	5.72	20.29	46.4	26.26	23.4	29.12	Ye et al., 2021
QTL-606	LG10	number of nod	9.08	23.66	14.58	2.87	5.05	16.37	9.08	23.66	Ye et al., 2021
QTL-607	LG3	Initial flowering time	30.47	31.06	0.59	61.81	84.72	NA	NA	NA	Ye et al., 2021
QTL-608	LG10	Days to flowering	15.86	23.57	7.71	2.91	1.37	19.415	15.17	23.66	Ye et al., 2021
QTL-609	LG3	Days to maturity	30.47	31.06	0.59	34.72	66.59	NA	NA	NA	Ye et al., 2021
QTL-610	LG10	Days to maturity	15.86	23.57	7.71	5.37	6.09	19.415	15.17	23.66	Ye et al., 2021
QTL-611	LG3	plant height	23.47	27.72	4.25	6	6.76	18.28	13.16	23.4	Ye et al., 2021
QTL-612	LG3	plant height	30.47	31.06	0.59	35.45	62.04	NA	NA	NA	Ye et al., 2021
QTL-613	LG3	Stem internode length	30.47	31.06	0.59	43.47	73.6	NA	NA	NA	Ye et al., 2021
QTL-614	LG10	number of nod	15.86	23.57	7.71	5.88	5.17	19.415	15.17	23.66	Ye et al., 2021
QTL-615	LG7	hundred-grain weight	14.699	20.82	6.121	3	19.7	17.7595	14.699	20.82	Jia et al.,2022
QTL-616	LG11	hundred-grain weight	60.603	61.238	0.635	3	14.2	60.9205	60.603	61.238	Jia et al.,2022
QTL-617	LG3	Initial flowering time	36.148	37.93	1.782	3	29.4	37.039	36.148	37.93	Jia et al.,2022
QTL-618	LG10	Initial flowering time	75.995	78.641	2.646	3	11.9	77.318	75.995	78.641	Jia et al.,2022
QTL-619	LG10	Seeds per pod	63.924	65.36	1.436	3	33.7	64.642	63.924	65.36	Jia et al.,2022
QTL-620	LG1	pod width	52.903	60.918	8.015	3	5.5	56.9105	52.903	60.918	Jia et al.,2022
QTL-621	LG5	pod width	113.085	113.373	0.288	3	7.3	113.229	113.085	113.373	Jia et al.,2022
QTL-622	LG7	pod width	14.121	14.699	0.578	3	12.3	14.41	14.121	14.699	Jia et al.,2022
QTL-623	LG11	pod width	62.282	62.626	0.344	3	11	62.454	62.282	62.626	Jia et al.,2022
QTL-624	LG5	pod length	113.085	113.373	0.288	3	13.4	113.229	113.085	113.373	Jia et al.,2022
QTL-625	LG7	pod length	21.976	22.263	0.287	3	7.6	22.1195	21.976	22.263	Jia et al.,2022
QTL-626	LG3	chlorophyll content	36.148	37.93	1.782	3	15.3	37.039	36.148	37.93	Jia et al.,2022
QTL-627	LG10	chlorophyll content	63.924	65.36	1.436	3	30.2	64.642	63.924	65.36	Jia et al.,2022
QTL-628	LG5	testa luster	40.393	43.033	2.64	3	61	41.1285	40.393	41.864	Jia et al.,2022
QTL-629	LG4	testa color	31.056	34.597	3.541	3	69.7	32.8265	31.056	34.597	Jia et al.,2022
QTL-630	LG2	plant height	31.959	35.152	3.193	3	15.5	33.5555	31.959	35.152	Jia et al.,2022
QTL-631	LG3	plant height	36.148	37.93	1.782	3	28.6	37.039	36.148	37.93	Jia et al.,2022
QTL-632	LG10	number of branch	63.924	65.36	1.436	3	16.5	64.642	63.924	65.36	Jia et al.,2022
QTL-633	LG7	Seed distribution density	24.298	25.769	1.471	3	6	25.0335	24.298	25.769	Jia et al.,2022
QTL-634	LG10	Seed distribution density	63.924	65.36	1.436	3	39.4	64.642	63.924	65.36	Jia et al.,2022
QTL-635	LG1	Days to burgeon	109.48	124.38	14.9	9.87	59.24	NA	NA	NA	Cai et al.,2022
QTL-636	LG2	Days to burgeon	0	42.8	42.8	16	63.85	NA	NA	NA	Cai et al.,2022
QTL-637	LG6	Days to burgeon	176.35	180.98	42.88	3.71	6.97	132.55	130.2	134.9	Cai et al.,2022
QTL-638	LG1	trifoliolate stage	109.48	124.38	14.9	2.59	26.76	NA	NA	NA	Cai et al.,2022
QTL-639	LG6	trifoliolate stage	99.98	102.92	2.94	6.36	10.29	57.7	56.1	59.3	Cai et al.,2022
QTL-640	LG9	branching stage	27.41	30.91	3.5	3.21	5.95	29.15	27.4	30.9	Cai et al.,2022
QTL-641	LG2	Initial flowering time	77.25	82.62	5.37	6.82	11.61	37.05	34.4	39.7	Cai et al.,2022
QTL-642	LG2	Days to branching to initial flowering	77.25	82.62	5.37	5.81	10.44	37.05	34.4	39.7	Cai et al.,2022
QTL-643	LG1	Days to flowering	109.48	124.38	14.9	4.35	36.95	NA	NA	NA	Cai et al.,2022
QTL-644	LG2	Days to flowering	0	42.88	4.88	6.84	51.3	NA	NA	NA	Cai et al.,2022
QTL-645	LG11	Days to branching to flowering	60.03	66.84	6.81	5.76	11.09	64.4	62	66.8	Cai et al.,2022
QTL-646	LG1	Days to maturity	109.48	124.38	14.9	5.83	37.77	NA	NA	NA	Cai et al.,2022
QTL-647	LG2	Days to maturity	0	42.88	4.88	6.72	44.76	NA	NA	NA	Cai et al.,2022
QTL-648	LG11	Days to maturity	0	1.86	1.86	3.7	6.19	0.95	0	1.9	Cai et al.,2022
QTL-649	LG11	Days to maturity	18.51	25.6	7.09	4.48	8.36	22.05	18.5	25.6	Cai et al.,2022
QTL-650	LG3	Pod number per plant	30.6	31.34	0.74	3.47	11.09	30.97	30.6	31.34	Ye et al., 2023
QTL-651	LG3	Pod number per plant	13.16	23.4	10.24	5.92	17.93	18.28	13.16	23.4	Ye et al., 2023
QTL-652	LG3	hundred-grain weight	29.12	31.34	2.22	3.78	5.33	30.23	29.12	31.34	Ye et al., 2023
QTL-653	LG7	hundred-grain weight	100.12	103.5	3.38	23.15	46.07	101.81	100.12	103.5	Ye et al., 2023
QTL-654	LG10	hundred-grain weight	6.84	9.08	2.24	2.9	4.24	7.96	6.84	9.08	Ye et al., 2023
QTL-655	LG3	number of branch	30.6	31.34	0.74	6.44	18.51	30.97	30.6	31.34	Ye et al., 2023
QTL-656	LG11	number of branch	33.46	35.32	1.86	2.85	7.06	34.39	33.46	35.32	Ye et al., 2023
QTL-657	LG3	Yield per plant	30.6	31.34	0.74	4.6	14.18	30.97	30.6	31.34	Ye et al., 2023
QTL-658	LG3	Pod number per plant	9.83	13.06	3.23	3.39	2.27	11.28	9.4	13.16	Ye et al., 2023
QTL-659	LG3	Seeds per pod	20.88	22.23	1.35	6.37	19.93	NA	NA	NA	Ye et al., 2023
QTL-660	LG7	hundred-grain weight	29.77	31.76	1.99	8.8	30.17	101.81	100.12	103.5	Ye et al., 2023
Reference
Alam, A.K.M.M., Somta, P., Muktadir, M.A., Srinives, P. (2014). Quantitative trait loci associated with seed weight in mungbean (Vigna radiata (L.) Wilczek). Kasetsart J. Nat. Sci. 48, 197-204.
Cai, D.B., Ding, D.H., Ma, L., Yang, S.Q., Sun, X.Y., Chen, J.B. (2022). Genetic linkage map encryption and QTL mapping for fertility-related traits in mung bean. Jiangsu Agri Sci. 50, 27-35. doi:10.15889/j.issn.1002-1302.2022.21.004
Chen, J.B. (2020a). Mapping of QTL for root length of mung bean seedlings under two water status. J Sichuan Agric Univ. 38, 416-422. doi:10.16036/j.issn.1000-2650.2020.04.006
Chen, J.B. (2020b). QTL mapping of yield-associated trait in mung bean. J Agric Sci Technol. 22, 38-48. doi:10.13304/j.nykjdb.2020.0517
Humphry, M.E., Lambrides, C.J., Chapman, S.C., Aitken, E.a.B., Imrie, B.C., Lawn, R.J., et al. (2005). Relationships between hard-seededness and seed weight in mungbean (Vigna radiata) assessed by QTL analysis. Plant Breeding. 124, 292-298. doi:10.1111/j.1439-0523.2005.01084.x
Isemura, T., Kaga, A., Tabata, S., Somta, P., Srinives, P., Shimizu, T., et al. (2012). Construction of a genetic linkage map and genetic analysis of domestication related traits in mungbean (Vigna radiata). PLoS One. 7, e41304. doi:10.1371/journal.pone.0041304
Jia, L., Wang, J., Wang, S.H., Chen, H.L., Cheng, X.Z., Du, J.D., et al. (2022). Identification of QTL associating with eleven agronomic traits in mungbean (Vigna radiata L.). J Plant Genet Resour. 23, 442-449. doi:10.13430/j.cnki.jpgr.20211021002
Kajonphol, T., Sangsiri, C., Somta, P., Toojinda, T., Srinives, P. (2012). SSR map construction and quantitative trait loci (QTL) identification of major agronomic traits in mungbean (Vigna radiata (L.) Wilczek). Sabrao J Breed Genet. 44, 71-86.
Liu, C.Y., Wu, J., Wang, L.F., Fan, B.J., Cao, Z.M., Su, Q.Z., et al. (2017). Quantitative trait locus mapping under irrigated and drought treatments based on a novel genetic linkage map in mungbean (Vigna radiata L.). Theor Appl Genet. 130, 2375-2393. doi:10.1007/s00122-017-2965-6
Ma, L. (2019). Genetic analysisand quantitative trait locus (QTL) mapping of mung bean growth period related traits. Master. Nanyang, Henan Province, China: Nanyang Normal University
Mei, L., Cheng, X.Z., Liu, C.J., Wang, S.H., Wang, L.X., Liu, C.Y., et al. (2011a). QTL mapping and interaction analysis for seed dormancy and seed weight of mungbean. J Plant Genet Resour. 12, 96-102. doi:10.13430/j.cnki.jpgr.2011.01.017
Mei, L., Cheng, X.Z., Wang, S.H., Wang, L.X., Cai, Q.X., Liu, C.J., et al. (2011b). QTL mapping of yield-associated agronomic traits in mungbean. J Plant Genet Resour. 12, 948-956. doi:10.13430/j.cnki.jpgr.2011.06.016
Singh, N., Mallick, J., Sagolsem, D., Mandal, N., Bhattacharyya, S. (2017). Mapping of molecular markers linked with MYMIV and yield attributing traits in mungbean. Indian J Genet. 78, 118-126. doi:10.5958/0975-6906.2018.00014.7
Somta, P., Chankaew, S., Kongjaimun, A., Srinives, P. (2015). QTLs controlling seed weight and days to flowering in mungbean [Vigna radiata (L.) Wilczek], their conservation in azuki bean [V. angularis (Ohwi) Ohwi and Ohashi] and rice bean [V. umbellata (Thunb.) Ohwi and Ohashi]. Agrivita. 37, 159-168. doi:10.17503/Agrivita-2015-37-2-p159-168
Wang, J. (2020). Construction of a high density genetic map and QTL analysis of agronomic traits in mungbean (Vigna radiata L.). Master. Beijing, China: Chinese Academy of Agricultural Sciences
Wang, J.H., Zhang, Y.W., Cheng, X.Z., Wang, L.X. (2017). Construction of genetic map and identification of QTLs related to agronomic traits in mung bean. Acta Agronomica Sinica. 43, 1096-1102. doi:10.3724/SP.J.1006.2017.01096
Ye, W.J., Yang, Y., Wang, P.R., Zhang, Y., Zhang, L.Y., Tian, D.F., et al. (2021). InDel marker development and QTL analysis of agronomic traits in mung bean [Vigna radiate (L.) Wilczek]. Mol Breeding. 41, 66. doi:10.1007/s11032-021-01233-0
Ye, W.J., Zhang, Y., Wang, P.R., Zhang, L.L., Tian, D.F., Wu, Z.J., et al. (2023). QTLs analysis for five yield-related traits in mungbean. Bull Bot. 58, 150-158. doi:10.11983/CBB22108
Zhong, M. (2012). Construction of genetic linkage map and mapping of bruchid-resistant gene (Brl) of mungbean. Master. Beijing, China: Chinese Academy of Agricultural Sciences

## Sheet: Table S4
Table S4. Classification and abbreviation of different yield and yield related traits in mungbean
pod-related traits	Pod number per plant	PNP
	total number of pods	PTN
	Podding habit	PDH
	Rate of shattered pods	PDR
	Pod number of twist	PDT
	pod length	PL
	pod width	PW
grain-related traits	hard seedness	HS
	Seed diameter	SD
	Seed distribution density	SDD
	seed length	SL
	Seed perimeter	SP
	seed thickness	ST
	seed width	SW
	Seed water absorption	SWA
	Seeds per pod	SPP
plant height-related traits	Main stem length	MSL
	number of nod	NO
	plant height	PH
	plant height index	PHI
	Stem internode length	SIL
leaf-related traits	chlorophyll content	CC
	curled leaf shape	CLS
	leaf width	LW
	maximum leaf area	MLA
	Mature leaf color	MLC
	notched leaf shape	NLS
	Relative leaf water content	RWC
	Trilobate leaf shape	TLS
branch number	Branch number per plant	BNP
	number of branch	BR
growth period-related traits	branching stage	BS
	Days to burgeon	DD
	Days to flowering	FD
	Days to harvest	HD
	Days to harf mature	HMD
	Days to maturity	MD
	trifoliolate stage	TS
	Initial flowering time	FTI
	Days to seedling emergence to branching	SBD
	Days to seedling emergence to flowering	SFD
	Days to seedling emergence to initial flowering	SIFD
	Days to seedling emergence to maturity	SMD
	Days to seedling emergence to three leaves	STD
	Days to branching to flowering	BFD
	Days to branching to initial flowering	BIFD
	Days to branching to maturity	BMD
	Days to initial flowering to flowering	IFFD
	Days to initial flowering to maturity	IFMD
	Days to trifoliolate to flowering	TFD
	Days to trifoliolate to initial flowering	TIFD
	Days to trifoliolate to maturity	TMD
	Days to trifoliolate to branching	TBD
other traits	Main stem thickness	MST
	geminating energy	GE
	Growth habit	GH
	germinating percentage	GP
	Hypocotyl plus epicotyl length	HECL
	Control root length	CRL
	Relative root length	RRL
	Treatment root length	TRL
	testa color	TC
	Young stem color	YSC
	Main stem color	MSC
	testa luster	TL
yield trait	Yield per block	YB
	yield index	YLDI
	Yield per plant	YPP
	biomass index	BMI
	biomass	BM
hundred-grain weight	hundred-grain weight	HGW

## Sheet: Table S5
Table S5. Details of MQTLs for yield and yield related traits in mungbean
MQTL Name	Chr	Position/cM	Confidence interval/cM	CI/cM	Flanking marker	Physical interval/bp	Num. of QTL	Trait
MQTLLG1-1	LG1	7.84	7.74-7.95	0.21	Mchr2-9-P2-463	1616679-1660542	8	BIFD, FTI, IFFD, MSL, SIFD, SIL5, SIL6, YB
MQTLLG1-2	LG1	30.61	30.26-30.95	0.69	P1-2222-Block986	6320505-6464627	6	HGW, PNP, SL, SW
MQTLLG1-3	LG1	40.13	39.6-40.67	1.07	CEDG037-Block1109	8271381-8494875	5	PH, YSC
MQTLLG1-4	LG1	43.57	43.15-44.00	0.85	ID1-5-Mchr2-33	9012881-9190423	3	PDR1W, PDR2W, PW
MQTLLG1-5	LG1	50.73	50.54-50.92	0.38	CEDG256-cp04220	10556454-10635826	2	PDT, PL
MQTLLG1-6	LG1	56.36	56.11-56.61	0.5	cp06173-cp05137	11719878-11824315	5	BR, HGW, PW, SWA
MQTLLG1-7	LG1	72.64	72.44-72.83	0.39	CEDG220-GMES4400	15130779-15212239	3	BR, SL, SPP
MQTLLG1-8	LG1	78.83	76.60-80.06	4.46	CEDG087-Block4811	15999691-16722393	10	DD, FD, GE, GP, HGW, HS, SPP, YPP
MQTLLG1-9	LG1	108.55	108.94-109.72	0.78	vr3-791-vr3-303	22754653-22917574	4	GH, HGW, PW, SPP
MQTLLG2-1	LG2	3.29	2.96-3.64	0.67	Block10369-Mchr11-50	304404-374334	12	BFD, FD, PH, PNP, SFD, YPP
MQTLLG2-2	LG2	15.67	14.85-16.49	1.64	CEDG006-GMES5341	1527161-1695817	11	BIFD, BM, HGW, HS, MLA, PW
MQTLLG2-3	LG2	33.16	32.84-33.49	0.65	MUS869-C145	3377236-3444082	8	CC, FTI, IFFD, PH, PW, SIFD, SW
MQTLLG2-4	LG2	37.45	36.34-38.56	2.22	VrCS215-1-cp02662	3737173-3965476	8	BIFD, BR, FTI, HMD, IFMD, SIFD
MQTLLG2-5	LG2	52.79	52.59-52.99	0.4	Block11082-Block11083	7683312-7825936	24	BM, BR, FD, HGW, MD, MLC, MSL, MST, PH, PTN, PW, SIL9, SIL10, SL, ST, SW, SWA, TIFD
MQTLLG2-6	LG2	80.17	79.87-80.47	0.6	CEDC050-cp04111	8213759-8275463	11	DD, HGW, PH, PL, SPP, YB
MQTLLG3-1	LG3	2.97	2.46-3.48	1.02	C268-Block16960	305952-432810	7	HGW, SIL5, SL, ST, SW, SWA
MQTLLG3-2	LG3	11.03	9.06-13	3.94	Block16985-Block17347	984787-1830738	9	HMD, HS, NO, PH, PNP, SIL1, SIL6, YPP
MQTLLG3-3	LG3	25.92	23.97-27.88	3.91	Block19219-P1-165	2981167-3467457	13	FD, MD, NLS, NO, PH
MQTLLG3-4	LG3	30.95	30.77-31.13	0.36	Block19265-ID3-9	3826889-3871662	6	BR, HGW, PH, PNP, YPP
MQTLLG3-5	LG3	37.31	37.20 - 37.42	0.22	Block20340-Block20341	8459293-8612422	10	CC, FTI, MSL, PH, PL
MQTLLG3-6	LG3	82.48	82.29 - 82.67	0.38	VR0169-GMES5091	10234471-10281731	5	BM, MLA, PH
MQTLLG4-1	LG4	22.24	21.85-22.63	0.78	X154-Block23718	2012737-2084588	4	HGW, PH, SWA, TC
MQTLLG4-2	LG4	24.94	24.65-25.23	0.58	VrCS215-2-VrCS123	2270662-2324089	4	HGW, PL
MQTLLG4-3	LG4	32.13	31.68-32.59	0.91	MGCP2946-P1-2059	2918238-3002064	6	TC
MQTLLG4-4	LG4	34	33.59-34.41	0.82	Block24100-Block24118	18332142-18688643	3	PW, TC
MQTLLG4-5	LG4	38.65	38.07-39.22	1.15	P1-2398-CEDG107	3506860-3612794	2	PTN, YSC
MQTLLG4-6	LG4	73.5	72.74-74.27	1.53	GMES1216a-GMES0247	6700526-6841463	46	FTI, BM, BR, CRL, DD, FD, FLD, HMD, MD, MLA, PH, PHI, PL, PTN, RWC, SPP, TRL, YB
MQTLLG4-7	LG4	91.57	91.52-91.61	0.09	Mchr4-144-Mchr4-141	8430466-8438757	3	PL
MQTLLG5-1	LG5	22.38	21.96-22.79	0.83	p3-677-p2-658	7201827-7474028	9	BR, CRL, HGW, NO, PH, SL, SPP
MQTLLG5-2	LG5	36.51	36.06-36.96	0.9	GMES5572-CEDG132	11825952-12121108	2	BR, SL
MQTLLG5-3	LG5	41.14	40.67 - 41.61	0.94	Block27749-Block27753	16333691-16669802	6	PH, TL
MQTLLG5-4	LG5	42.45	42.15 - 42.74	0.59	Block27753-CEDG115	13823180-14016671	12	HGW, NO, PH, PL, SPP, TC, TL
MQTLLG5-5	LG5	51.76	51.18 - 52.33	1.15	Block28316-Block28322	21293737-21593835	7	BR, DD, FTI, PL, PW
MQTLLG5-6	LG5	76.07	74.72 - 77.42	2.7	LpCS283-VrCS215-4	24504579-25390049	4	HGW, PL, PW
MQTLLG5-7	LG5	113.22	113.15 - 113.3	0.15	Block29473-Block29466	34397408-34896322	4	PL, PW
MQTLLG6-1	LG6	29.8	29.04-30.57	1.53	Block30563-Block30577	7532990-8316651	8	BR, FD, MD, PDR1W, PDR2W, PDR4W, PL, PW
MQTLLG6-2	LG6	47.18	46.02-48.33	2.31	pO111-Block30589	10039858-10543814	5	MSL, PW, RRL, SIL9, SIL10
MQTLLG6-3	LG6	58.1	57.61-58.59	0.98	Block30703-Block30708	12967464-13760735	13	HGW, MD, SD, SP, STD, TBD, TS
MQTLLG6-4	LG6	89.22	85.08-93.36	8.28	Block31216-Block32354	25092455-29302005	2	BM, YSC
MQTLLG6-5	LG6	127.66	127.55-127.77	0.22	Block33977-Block33724	35958037-36747123	10	DD, SIFD, TC, YSC
MQTLLG7-1	LG7	2.87	2.025-3.715	1.69	MBSSR203-p3-281	712252-1306674	6	HGW, ST, TIFD
MQTLLG7-2	LG7	7.64	7.00-8.28	1.28	Block36251-Block36491	14836507-18386100	8	HGW, PDT, PL, PW, SL, SW
MQTLLG7-3	LG7	14.38	14.19-14.58	0.39	GMES0090-ID7-18	4991038-5128212	10	DD, FTI, HGW, PDR1W, PH, PW, SP, SPP
MQTLLG7-4	LG7	18.07	17.04-19.11	2.07	P2-74-H57	5993466-6721546	6	HGW, PDR2W, PDR4W, PL, PTN
MQTLLG7-5	LG7	22.11	22.01-22.21	0.2	Block39237-Block38561	25498064-26392762	3	MD, PL
MQTLLG7-6	LG7	25.06	24.54-25.58	1.04	CEDG172-Block39243	8631436-8997234	2	SDD
MQTLLG7-7	LG7	39.52	39.4-39.64	0.24	Block40483-Block40492	39125643-39614634	7	LW, PH, PL, SPP, YB
MQTLLG8-1	LG8	21.02	19.69-22.36	2.67	VrCs228-P3-1384	8032629-9121868	8	BR, HGW, PH, PW, RWC, YPP
MQTLLG8-2	LG8	27.02	25.98-28.07	2.09	Block44420-Block44474	11037255-16042198	3	BMI, MLA, PH
MQTLLG8-3	LG8	32.25	31.12-33.39	2.27	Block44714-Block45140	16952337-23606401	10	BM, BMI, PH, PW, RWC, SIL1, YB, YLDI
MQTLLG8-4	LG8	39.14	38.62-39.67	1.05	Block45139-DMBSSR030	15755212-16183565	4	BR, FD, PW
MQTLLG8-5	LG8	69.8	69.61-69.99	0.38	Block49403-Block49363	34754250-34877547	5	HGW, PW, SL, ST, SW
MQTLLG9-1	LG9	15.01	14.16-15.87	1.71	MUS126-MUS257	1770366-1984160	5	HGW, MSL, PH, SIL10, SW
MQTLLG9-2	LG9	30.95	30.6-31.3	0.7	Mchr5-37-H51	3825790-3913308	15	BIFD, BR, BS, MD, PH, PL, PNP, PW, SBD, SIL9, SPP, TBD
MQTLLG9-3	LG9	35.94	35.64-36.24	0.6	GMES2876-VrCS116	4455920-4530936	2	NO, PH
MQTLLG9-4	LG9	57.12	56.80-57.45	0.65	Block57600-Block57598	16091906-16126437	18	BR, DD, FD, HGW, HMD, NO, PH, PL, SPP, YB
MQTLLG9-5	LG9	60.21	60.12-60.30	0.18	Block57621-Block57702	17258776-17514482	6	BR, FD, HMD, PH, PW
MQTLLG10-1	LG10	6.37	5.55-7.20	1.65	Block6869-P2-7	993446-1288795	4	BNP, HGW, SL
MQTLLG10-2	LG10	20.98	20.33-21.63	1.3	C69-PV-ggc001	3639055-3871755	19	BNP, FD, HGW, MD, NO, PH, PL, SD, SW, YB
MQTLLG10-3	LG10	38.59	37.21-39.98	2.77	Block7202-MGCP25234	6660563-7156391	16	HECL, HGW, MSL, PL, SIL1, SIL2, SIL3, SIL5,SIL6, SIL7, SIL8, SIL9, SIL10
MQTLLG10-4	LG10	52.33	51.83-52.84	1.01	CEDG044-Block7435	9277533-9458322	5	PW, RWC, SW
MQTLLG10-5	LG10	61.35	61.01-61.70	0.69	Block7455-Mchr1-15	10920746-11044256	3	PW, SDD
MQTLLG10-6	LG10	64.64	64.44-64.85	0.41	cp10667-Block7463	11534714-11608104	12	BR, CC, CLS, SD, SDD, SPP
MQTLLG10-7	LG10	72.41	72.08-72.76	0.69	Block7482-Block7483	17531051-17632220	3	NLS, SPP
MQTLLG10-8	LG10	78.56	78.47-78.65	0.18	Block7494-Block7498	18040245-18335790	3	FTI
MQTLLG11-1	LG11	0.95	0.70-1.21	0.51	GMES0521-Mchr10-5	157318-271936	14	BFD, BNP, FD, IFFD, MD, SFD, SMD, TFD, TMD
MQTLLG11-2	LG11	4.76	4.21-5.31	1.1	Block7976-Block7847	1170014-1292389	6	BR, GE, GP, PL, YB
MQTLLG11-3	LG11	16.02	15.36-16.69	1.33	Block8069-cp04558	3452012-3750917	2	FD, MD
MQTLLG11-4	LG11	22.21	20.73-23.70	2.97	Block8176-vr2-1669	4658868-5326347	8	HGW, GE, GP, HS, MD, PH, PW, ST
MQTLLG11-5	LG11	28.25	27.51-28.99	1.48	CEDG076-Block8255	6182608-6515224	5	BR, RRL, SL, SW, TRL
MQTLLG11-6	LG11	62.45	62.33-62.57	0.24	Block9623-Block9624	12704218-12871229	8	BFD, BS, HGW, PW, SBD, SL
MQTLLG11-7	LG11	68.69	68.62-68.76	0.14	Block9636-Block9637	14343786-14623684	7	BFD, FD, IFMD, MD, SFD, SMD, TFD
Bold MQTL represent the breeder's MQTL
BFD: Days to branching to flowering, BIFD: Days to branching to initial flowering, BM: biomass, BMD: Days to branching to maturity, BMI: Biomass index, BNP: Branch number per plant, BR: Number of branch, BS: Branching stage, CC: Chlorophyll content, CLS: Curled leaf shape, CRL: Control root length, DD: Days to burgeon, FD: Days to flowering, FTI: Initial flowering time, GE: Geminating energy, GH:…

## Sheet: Table S6
Table S6. Comparison of MQTL and MTA physical locations in GWAS
Chromosome	MTA	Physical position (bp)	Reference	MQTLs
LG1	1_24694_C_G	24694	Liu et al., 2022a
LG1	S1_1260064	1260064	Manjunatha et al., 2023
LG1	S1_1401609	1401609	Manjunatha et al., 2023
LG1	S1_1401613	1401613	Manjunatha et al., 2023
LG1	S1_1401613	1401613	Manjunatha et al., 2023
LG1	S1_1401637	1401637	Manjunatha et al., 2023
LG1	1_1881396	1881396	Chiteri et al., 2023
LG1	1_1948708	1948708	Chiteri et al., 2023
LG1	S1_2065382	2065382	Manjunatha et al., 2023
LG1	S1_2065382	2065382	Manjunatha et al., 2023
LG1	1_4041872_G_A	4041872	Liu et al., 2022a
LG1	1_4045860_T_G	4045860	Liu et al., 2022a
LG1	NA	5295897	Han et al., 2022
LG1	NA	5324156	Han et al., 2022
LG1	1_7366932_C_T	7366932	Liu et al., 2022a
LG1	S1_7517183	7517183	Manjunatha et al., 2023
LG1	1_7899716	7899716	Chiteri et al., 2023
LG1	NA	8145968	Han et al., 2022
LG1	NA	8177726	Liu et al., 2022b
LG1	1_9060887	9060887	Chiteri et al., 2023	MQTLLG1-4
LG1	NA	9865038	Han et al., 2022
LG1	NA	10395779	Liu et al., 2022b
LG1	1_11948708	11948708	Chiteri et al., 2023
LG1	1_12063422	12063422	Chiteri et al., 2023
LG1	1_12063422	12063422	Chiteri et al., 2023
LG1	1_12063422	12063422	Chiteri et al., 2023
LG1	1_12063422	12063422	Chiteri et al., 2023
LG1	1_12063422	12063422	Chiteri et al., 2023
LG1	1_12063422	12063422	Chiteri et al., 2023
LG1	1_12063422	12063422	Chiteri et al., 2023
LG1	1_12063422	12063422	Chiteri et al., 2023
LG1	NA	12166173	Liu et al., 2022b
LG1	NA	13246199	Liu et al., 2022b
LG1	S1_13315197	13315197	Manjunatha et al., 2023
LG1	1_14740874	14740874	Chiteri et al., 2023
LG1	1_17849230_G_T	17849230	Liu et al., 2022a
LG1	1_17885582_G_T	17885582	Liu et al., 2022a
LG1	1_17885618_A_G	17885618	Liu et al., 2022a
LG1	1_17911779_T_C	17911779	Liu et al., 2022a
LG1	NA	18641699	Han et al., 2022
LG1	NA	18910675	Han et al., 2022
LG1	S1_23992177	23992177	Manjunatha et al., 2023
LG1	1_24527235_C_A	24527235	Liu et al., 2022a
LG1	NA	24860516	Han et al., 2022
LG1	NA	25789818	Liu et al., 2022b
LG1	NA	26315874	Liu et al., 2022b
LG1	NA	30724948	Liu et al., 2022b
LG1	S1_33479087	33479087	Manjunatha et al., 2023
LG1	S1_33479088	33479088	Manjunatha et al., 2023
LG1	S1_34950467	34950467	Manjunatha et al., 2023
LG1	S1_34950474	34950474	Manjunatha et al., 2023
LG1	S1_34950502	34950502	Manjunatha et al., 2023
LG1	1_35499193_G_A	35499193	Liu et al., 2022a
LG1	1_35504822_C_T	35504822	Liu et al., 2022a
LG1	1_35504822_C_T	35504822	Liu et al., 2022a
LG1	1_35504822_C_T	35504822	Liu et al., 2022a
LG1	1_35504822_C_T	35504822	Liu et al., 2022a
LG1	1_35504822_C_T	35504822	Liu et al., 2022a
LG1	1_35504822_C_T	35504822	Liu et al., 2022a
LG1	1_35509976_A_G	35509976	Liu et al., 2022a
LG1	1_35509976_A_G	35509976	Liu et al., 2022a
LG1	1_35510923_A_G	35510923	Liu et al., 2022a
LG1	1_35510923_A_G	35510923	Liu et al., 2022a
LG1	1_35510923_A_G	35510923	Liu et al., 2022a
LG1	1_35510923_A_G	35510923	Liu et al., 2022a
LG1	1_35515097_A_G	35515097	Liu et al., 2022a
LG1	1_35515161_A_G	35515161	Liu et al., 2022a
LG1	1_35515166_G_A	35515166	Liu et al., 2022a
LG1	1_35515166_G_A	35515166	Liu et al., 2022a
LG1	1_35515220_C_T	35515220	Liu et al., 2022a
LG1	1_35516946_T_C	35516946	Liu et al., 2022a
LG1	1_35516946_T_C	35516946	Liu et al., 2022a
LG1	1_35518232_T_C	35518232	Liu et al., 2022a
LG1	1_35518232_T_C	35518232	Liu et al., 2022a
LG1	1_35518232_T_C	35518232	Liu et al., 2022a
LG1	1_35518232_T_C	35518232	Liu et al., 2022a
LG1	1_35518232_T_C	35518232	Liu et al., 2022a
LG1	1_35518232_T_C	35518232	Liu et al., 2022a
LG1	1_35519046_G_A	35519046	Liu et al., 2022a
LG1	1_35519046_G_A	35519046	Liu et al., 2022a
LG1	1_35519103_G_C	35519103	Liu et al., 2022a
LG1	1_35519103_G_C	35519103	Liu et al., 2022a
LG1	1_35522513_G_A	35522513	Liu et al., 2022a
LG1	1_35522513_G_A	35522513	Liu et al., 2022a
LG1	1_35522513_G_A	35522513	Liu et al., 2022a
LG1	1_35522513_G_A	35522513	Liu et al., 2022a
LG1	1_35522845_A_G	35522845	Liu et al., 2022a
LG1	1_35522845_A_G	35522845	Liu et al., 2022a
LG1	1_35522845_A_G	35522845	Liu et al., 2022a
LG1	1_35522845_A_G	35522845	Liu et al., 2022a
LG1	1_35523257_C_A	35523257	Liu et al., 2022a
LG1	1_35523257_C_A	35523257	Liu et al., 2022a
LG1	1_35523257_C_A	35523257	Liu et al., 2022a
LG1	1_35523331_A_T	35523331	Liu et al., 2022a
LG1	1_35523331_A_T	35523331	Liu et al., 2022a
LG1	1_35523331_A_T	35523331	Liu et al., 2022a
LG1	1_35523331_A_T	35523331	Liu et al., 2022a
LG1	1_35525040_A_G	35525040	Liu et al., 2022a
LG1	1_35525480_G_C	35525480	Liu et al., 2022a
LG1	1_35525480_G_C	35525480	Liu et al., 2022a
LG1	1_35525480_G_C	35525480	Liu et al., 2022a
LG1	1_35525572_A_G	35525572	Liu et al., 2022a
LG1	1_35525572_A_G	35525572	Liu et al., 2022a
LG1	1_35525578_C_T	35525578	Liu et al., 2022a
LG1	1_35525578_C_T	35525578	Liu et al., 2022a
LG1	1_35525589_A_G	35525589	Liu et al., 2022a
LG1	1_35526682_T_C	35526682	Liu et al., 2022a
LG1	1_35526682_T_C	35526682	Liu et al., 2022a
LG1	1_35526682_T_C	35526682	Liu et al., 2022a
LG1	1_35526682_T_C	35526682	Liu et al., 2022a
LG1	1_35526682_T_C	35526682	Liu et al., 2022a
LG1	1_35526682_T_C	35526682	Liu et al., 2022a
LG1	1_35526823_T_C	35526823	Liu et al., 2022a
LG1	1_35526823_T_C	35526823	Liu et al., 2022a
LG1	1_35526823_T_C	35526823	Liu et al., 2022a
LG1	1_35526823_T_C	35526823	Liu et al., 2022a
LG1	1_35526823_T_C	35526823	Liu et al., 2022a
LG1	1_35526823_T_C	35526823	Liu et al., 2022a
LG1	1_35528423_T_C	35528423	Liu et al., 2022a
LG1	1_35528423_T_C	35528423	Liu et al., 2022a
LG1	1_35528423_T_C	35528423	Liu et al., 2022a
LG1	1_35528423_T_C	35528423	Liu et al., 2022a
LG1	1_35528423_T_C	35528423	Liu et al., 2022a
LG1	1_35528423_T_C	35528423	Liu et al., 2022a
LG1	1_35528724_A_G	35528724	Liu et al., 2022a
LG1	1_35529080_C_T	35529080	Liu et al., 2022a
LG1	1_35529080_C_T	35529080	Liu et al., 2022a
LG1	1_35529114_C_G	35529114	Liu et al., 2022a
LG1	1_35529114_C_G	35529114	Liu et al., 2022a
LG1	1_35529362_C_T	35529362	Liu et al., 2022a
LG1	1_35529362_C_T	35529362	Liu et al., 2022a
LG1	1_35529362_C_T	35529362	Liu et al., 2022a
LG1	1_35529384_T_C	35529384	Liu et al., 2022a
LG1	1_35529435_A_G	35529435	Liu et al., 2022a
LG1	1_35529456_T_C	35529456	Liu et al., 2022a
LG1	1_35532221_A_G	35532221	Liu et al., 2022a
LG1	1_35532221_A_G	35532221	Liu et al., 2022a
LG1	1_35532221_A_G	35532221	Liu et al., 2022a
LG1	1_35532221_A_G	35532221	Liu et al., 2022a
LG1	1_35532221_A_G	35532221	Liu et al., 2022a
LG1	1_35532221_A_G	35532221	Liu et al., 2022a
LG1	1_35537300_G_A	35537300	Liu et al., 2022a
LG1	1_35537300_G_A	35537300	Liu et al., 2022a
LG1	1_35537300_G_A	35537300	Liu et al., 2022a
LG1	1_35537561_C_T	35537561	Liu et al., 2022a
LG1	1_35537561_C_T	35537561	Liu et al., 2022a
LG1	1_35537561_C_T	35537561	Liu et al., 2022a
LG1	1_35537564_A_G	35537564	Liu et al., 2022a
LG1	1_35537564_A_G	35537564	Liu et al., 2022a
LG1	1_35537564_A_G	35537564	Liu et al., 2022a
LG1	1_35537697_C_T	35537697	Liu et al., 2022a
LG1	1_35537697_C_T	35537697	Liu et al., 2022a
LG1	1_35537697_C_T	35537697	Liu et al., 2022a
LG1	1_35537775_G_C	35537775	Liu et al., 2022a
LG1	1_35537775_G_C	35537775	Liu et al., 2022a
LG1	1_35537775_G_C	35537775	Liu et al., 2022a
LG1	1_35537998_G_T	35537998	Liu et al., 2022a
LG1	1_35537998_G_T	35537998	Liu et al., 2022a
LG1	1_35538009_A_G	35538009	Liu et al., 2022a
LG1	1_35538009_A_G	35538009	Liu et al., 2022a
LG1	1_35538094_G_A	35538094	Liu et al., 2022a
LG1	1_35538094_G_A	35538094	Liu et al., 2022a
LG1	1_35538094_G_A	35538094	Liu et al., 2022a
LG1	1_35538275_G_A	35538275	Liu et al., 2022a
LG1	1_35538330_G_A	35538330	Liu et al., 2022a
LG1	1_35538330_G_A	35538330	Liu et al., 2022a
LG1	1_35538330_G_A	35538330	Liu et al., 2022a
LG1	1_35539026_G_C	35539026	Liu et al., 2022a
LG1	1_35539026_G_C	35539026	Liu et al., 2022a
LG1	1_35539026_G_C	35539026	Liu et al., 2022a
LG1	1_35539026_G_C	35539026	Liu et al., 2022a
LG1	1_35544782_A_G	35544782	Liu et al., 2022a
LG1	1_35546920_C_A	35546920	Liu et al., 2022a
LG1	1_35546920_C_A	35546920	Liu et al., 2022a
LG1	1_35546920_C_A	35546920	Liu et al., 2022a
LG1	1_35546920_C_A	35546920	Liu et al., 2022a
LG1	1_35546920_C_A	35546920	Liu et al., 2022a
LG1	1_35546920_C_A	35546920	Liu et al., 2022a
LG1	1_35546920_C_A	35546920	Liu et al., 2022a
LG1	1_35546920_C_A	35546920	Liu et al., 2022a
LG1	1_35553307_C_T	35553307	Liu et al., 2022a
LG1	1_35553307_C_T	35553307	Liu et al., 2022a
LG1	1_35556181_T_C	35556181	Liu et al., 2022a
LG1	1_35556181_T_C	35556181	Liu et al., 2022a
LG1	1_35556181_T_C	35556181	Liu et al., 2022a
LG1	1_35556181_T_C	35556181	Liu et al., 2022a
LG1	1_35556181_T_C	35556181	Liu et al., 2022a
LG1	1_35556371_C_T	35556371	Liu et al., 2022a
LG1	1_35556806_C_T	35556806	Liu et al., 2022a
LG1	1_35556806_C_T	35556806	Liu et al., 2022a
LG1	1_35556806_C_T	35556806	Liu et al., 2022a
LG1	1_35556913_C_T	35556913	Liu et al., 2022a
LG1	1_35556913_C_T	35556913	Liu et al., 2022a
LG1	1_35557275_C_T	35557275	Liu et al., 2022a
LG1	1_35557275_C_T	35557275	Liu et al., 2022a
LG1	1_35557275_C_T	35557275	Liu et al., 2022a
LG1	1_35557275_C_T	35557275	Liu et al., 2022a
LG1	1_35557275_C_T	35557275	Liu et al., 2022a
LG1	1_35557343_G_A	35557343	Liu et al., 2022a
LG1	1_35557343_G_A	35557343	Liu et al., 2022a
LG1	1_35557343_G_A	35557343	Liu et al., 2022a
LG1	1_35557343_G_A	35557343	Liu et al., 2022a
LG1	1_35557343_G_A	35557343	Liu et al., 2022a
LG1	1_35557473_A_G	35557473	Liu et al., 2022a
LG1	1_35568433_T_A	35568433	Liu et al., 2022a
LG1	1_35572756_A_T	35572756	Liu et al., 2022a
LG1	1_35572756_A_T	35572756	Liu et al., 2022a
LG1	1_35572756_A_T	35572756	Liu et al., 2022a
LG1	1_35572756_A_T	35572756	Liu et al., 2022a
LG1	1_35572777_A_C	35572777	Liu et al., 2022a
LG1	1_35572777_A_C	35572777	Liu et al., 2022a
LG1	1_35572777_A_C	35572777	Liu et al., 2022a
LG1	1_35572777_A_C	35572777	Liu et al., 2022a
LG1	1_35572777_A_C	35572777	Liu et al., 2022a
LG1	1_35572846_C_T	35572846	Liu et al., 2022a
LG1	1_35572846_C_T	35572846	Liu et al., 2022a
LG1	1_35572846_C_T	35572846	Liu et al., 2022a
LG1	1_35572846_C_T	35572846	Liu et al., 2022a
LG1	1_35572846_C_T	35572846	Liu et al., 2022a
LG1	1_35572855_T_C	35572855	Liu et al., 2022a
LG1	1_35572855_T_C	35572855	Liu et al., 2022a
LG1	1_35572855_T_C	35572855	Liu et al., 2022a
LG1	1_35572855_T_C	35572855	Liu et al., 2022a
LG1	1_35572898_G_A	35572898	Liu et al., 2022a
LG1	1_35572898_G_A	35572898	Liu et al., 2022a
LG1	1_35572898_G_A	35572898	Liu et al., 2022a
LG1	1_35572898_G_A	35572898	Liu et al., 2022a
LG1	1_35572929_A_C	35572929	Liu et al., 2022a
LG1	1_35572929_A_C	35572929	Liu et al., 2022a
LG1	1_35572929_A_C	35572929	Liu et al., 2022a
LG1	1_35572929_A_C	35572929	Liu et al., 2022a
LG1	1_35573011_T_C	35573011	Liu et al., 2022a
LG1	1_35573046_T_C	35573046	Liu et al., 2022a
LG1	1_35573046_T_C	35573046	Liu et al., 2022a
LG1	1_35573046_T_C	35573046	Liu et al., 2022a
LG1	1_35573046_T_C	35573046	Liu et al., 2022a
LG1	1_35573046_T_C	35573046	Liu et al., 2022a
LG1	1_35573913_C_G	35573913	Liu et al., 2022a
LG1	1_35574128_C_T	35574128	Liu et al., 2022a
LG1	1_35574128_C_T	35574128	Liu et al., 2022a
LG1	1_35574128_C_T	35574128	Liu et al., 2022a
LG1	1_35574128_C_T	35574128	Liu et al., 2022a
LG1	1_35574128_C_T	35574128	Liu et al., 2022a
LG1	1_35574155_G_A	35574155	Liu et al., 2022a
LG1	1_35574155_G_A	35574155	Liu et al., 2022a
LG1	1_35574155_G_A	35574155	Liu et al., 2022a
LG1	1_35574155_G_A	35574155	Liu et al., 2022a
LG1	1_35574155_G_A	35574155	Liu et al., 2022a
LG1	1_35574155_G_A	35574155	Liu et al., 2022a
LG1	1_35574181_T_A	35574181	Liu et al., 2022a
LG1	1_35574181_T_A	35574181	Liu et al., 2022a
LG1	1_35574181_T_A	35574181	Liu et al., 2022a
LG1	1_35574181_T_A	35574181	Liu et al., 2022a
LG1	1_35574181_T_A	35574181	Liu et al., 2022a
LG1	1_35574191_C_T	35574191	Liu et al., 2022a
LG1	1_35574191_C_T	35574191	Liu et al., 2022a
LG1	1_35574191_C_T	35574191	Liu et al., 2022a
LG1	1_35574191_C_T	35574191	Liu et al., 2022a
LG1	1_35574191_C_T	35574191	Liu et al., 2022a
LG1	1_35574191_C_T	35574191	Liu et al., 2022a
LG1	1_35574195_C_T	35574195	Liu et al., 2022a
LG1	1_35574195_C_T	35574195	Liu et al., 2022a
LG1	1_35574195_C_T	35574195	Liu et al., 2022a
LG1	1_35574195_C_T	35574195	Liu et al., 2022a
LG1	1_35574195_C_T	35574195	Liu et al., 2022a
LG1	1_35574232_C_T	35574232	Liu et al., 2022a
LG1	1_35574232_C_T	35574232	Liu et al., 2022a
LG1	1_35574232_C_T	35574232	Liu et al., 2022a
LG1	1_35574232_C_T	35574232	Liu et al., 2022a
LG1	1_35574232_C_T	35574232	Liu et al., 2022a
LG1	1_35574246_C_T	35574246	Liu et al., 2022a
LG1	1_35574246_C_T	35574246	Liu et al., 2022a
LG1	1_35574246_C_T	35574246	Liu et al., 2022a
LG1	1_35574246_C_T	35574246	Liu et al., 2022a
LG1	1_35574246_C_T	35574246	Liu et al., 2022a
LG1	1_35574333_A_G	35574333	Liu et al., 2022a
LG1	1_35574379_G_A	35574379	Liu et al., 2022a
LG1	1_35574383_A_G	35574383	Liu et al., 2022a
LG1	1_35574422_G_A	35574422	Liu et al., 2022a
LG1	1_35574422_G_A	35574422	Liu et al., 2022a
LG1	1_35574653_G_A	35574653	Liu et al., 2022a
LG1	1_35574653_G_A	35574653	Liu et al., 2022a
LG1	1_35574653_G_A	35574653	Liu et al., 2022a
LG1	1_35574653_G_A	35574653	Liu et al., 2022a
LG1	1_35574653_G_A	35574653	Liu et al., 2022a
LG1	1_35574653_G_A	35574653	Liu et al., 2022a
LG1	1_35574708_A_G	35574708	Liu et al., 2022a
LG1	1_35574742_C_T	35574742	Liu et al., 2022a
LG1	1_35574742_C_T	35574742	Liu et al., 2022a
LG1	1_35574742_C_T	35574742	Liu et al., 2022a
LG1	1_35574742_C_T	35574742	Liu et al., 2022a
LG1	1_35583863_C_T	35583863	Liu et al., 2022a
LG1	1_35583863_C_T	35583863	Liu et al., 2022a
LG1	1_35583863_C_T	35583863	Liu et al., 2022a
LG1	1_35583863_C_T	35583863	Liu et al., 2022a
LG1	1_35583863_C_T	35583863	Liu et al., 2022a
LG1	1_35584002_C_A	35584002	Liu et al., 2022a
LG1	1_35584002_C_A	35584002	Liu et al., 2022a
LG1	1_35584183_A_G	35584183	Liu et al., 2022a
LG1	1_35584183_A_G	35584183	Liu et al., 2022a
LG1	1_35584183_A_G	35584183	Liu et al., 2022a
LG1	1_35584183_A_G	35584183	Liu et al., 2022a
LG1	1_35584183_A_G	35584183	Liu et al., 2022a
LG1	1_35584183_A_G	35584183	Liu et al., 2022a
LG1	1_35584342_G_A	35584342	Liu et al., 2022a
LG1	1_35584342_G_A	35584342	Liu et al., 2022a
LG1	1_35584342_G_A	35584342	Liu et al., 2022a
LG1	1_35584342_G_A	35584342	Liu et al., 2022a
LG1	1_35584342_G_A	35584342	Liu et al., 2022a
LG1	1_35584342_G_A	35584342	Liu et al., 2022a
LG1	1_35584626_T_C	35584626	Liu et al., 2022a
LG1	1_35584670_T_C	35584670	Liu et al., 2022a
LG1	1_35584670_T_C	35584670	Liu et al., 2022a
LG1	1_35584670_T_C	35584670	Liu et al., 2022a
LG1	1_35584670_T_C	35584670	Liu et al., 2022a
LG1	1_35584670_T_C	35584670	Liu et al., 2022a
LG1	1_35584670_T_C	35584670	Liu et al., 2022a
LG1	1_35584830_C_T	35584830	Liu et al., 2022a
LG1	1_35584830_C_T	35584830	Liu et al., 2022a
LG1	1_35584830_C_T	35584830	Liu et al., 2022a
LG1	1_35584830_C_T	35584830	Liu et al., 2022a
LG1	1_35584830_C_T	35584830	Liu et al., 2022a
LG1	1_35584830_C_T	35584830	Liu et al., 2022a
LG1	1_35584956_A_G	35584956	Liu et al., 2022a
LG1	1_35585130_G_A	35585130	Liu et al., 2022a
LG1	1_35585130_G_A	35585130	Liu et al., 2022a
LG1	1_35585130_G_A	35585130	Liu et al., 2022a
LG1	1_35586095_G_A	35586095	Liu et al., 2022a
LG1	1_35586152_T_C	35586152	Liu et al., 2022a
LG1	1_35586152_T_C	35586152	Liu et al., 2022a
LG1	1_35586930_A_T	35586930	Liu et al., 2022a
LG1	1_35586930_A_T	35586930	Liu et al., 2022a
LG1	1_35586930_A_T	35586930	Liu et al., 2022a
LG1	1_35586930_A_T	35586930	Liu et al., 2022a
LG1	1_35586930_A_T	35586930	Liu et al., 2022a
LG1	1_35586930_A_T	35586930	Liu et al., 2022a
LG1	1_35586930_A_T	35586930	Liu et al., 2022a
LG1	1_35586930_A_T	35586930	Liu et al., 2022a
LG1	1_35587904_T_C	35587904	Liu et al., 2022a
LG1	1_35588631_A_C	35588631	Liu et al., 2022a
LG1	1_35588631_A_C	35588631	Liu et al., 2022a
LG1	1_35588631_A_C	35588631	Liu et al., 2022a
LG1	1_35588641_A_G	35588641	Liu et al., 2022a
LG1	1_35588641_A_G	35588641	Liu et al., 2022a
LG1	1_35588641_A_G	35588641	Liu et al., 2022a
LG1	1_35588641_A_G	35588641	Liu et al., 2022a
LG1	1_35588641_A_G	35588641	Liu et al., 2022a
LG1	1_35588641_A_G	35588641	Liu et al., 2022a
LG1	1_35589410_C_A	35589410	Liu et al., 2022a
LG1	1_35589410_C_A	35589410	Liu et al., 2022a
LG1	1_35589410_C_A	35589410	Liu et al., 2022a
LG1	1_35589410_C_A	35589410	Liu et al., 2022a
LG1	1_35589410_C_A	35589410	Liu et al., 2022a
LG1	1_35589410_C_A	35589410	Liu et al., 2022a
LG1	1_35590546_T_C	35590546	Liu et al., 2022a
LG1	1_35590546_T_C	35590546	Liu et al., 2022a
LG1	1_35590546_T_C	35590546	Liu et al., 2022a
LG1	1_35590546_T_C	35590546	Liu et al., 2022a
LG1	1_35590546_T_C	35590546	Liu et al., 2022a
LG1	1_35590546_T_C	35590546	Liu et al., 2022a
LG1	1_35590596_A_G	35590596	Liu et al., 2022a
LG1	1_35590596_A_G	35590596	Liu et al., 2022a
LG1	1_35590596_A_G	35590596	Liu et al., 2022a
LG1	1_35590596_A_G	35590596	Liu et al., 2022a
LG1	1_35590596_A_G	35590596	Liu et al., 2022a
LG1	1_35590596_A_G	35590596	Liu et al., 2022a
LG1	1_35590596_A_G	35590596	Liu et al., 2022a
LG1	1_35590689_C_A	35590689	Liu et al., 2022a
LG1	1_35590689_C_A	35590689	Liu et al., 2022a
LG1	1_35590689_C_A	35590689	Liu et al., 2022a
LG1	1_35590689_C_A	35590689	Liu et al., 2022a
LG1	1_35590689_C_A	35590689	Liu et al., 2022a
LG1	1_35595852_A_G	35595852	Liu et al., 2022a
LG1	1_35597273_C_G	35597273	Liu et al., 2022a
LG1	1_35597273_C_G	35597273	Liu et al., 2022a
LG1	1_35597273_C_G	35597273	Liu et al., 2022a
LG1	1_35597273_C_G	35597273	Liu et al., 2022a
LG1	1_35597273_C_G	35597273	Liu et al., 2022a
LG1	1_35597344_C_T	35597344	Liu et al., 2022a
LG1	1_35597344_C_T	35597344	Liu et al., 2022a
LG1	1_35597344_C_T	35597344	Liu et al., 2022a
LG1	1_35597344_C_T	35597344	Liu et al., 2022a
LG1	1_35597363_A_G	35597363	Liu et al., 2022a
LG1	1_35597363_A_G	35597363	Liu et al., 2022a
LG1	1_35597363_A_G	35597363	Liu et al., 2022a
LG1	1_35597363_A_G	35597363	Liu et al., 2022a
LG1	1_35597363_A_G	35597363	Liu et al., 2022a
LG1	1_35597834_T_G	35597834	Liu et al., 2022a
LG1	1_35597834_T_G	35597834	Liu et al., 2022a
LG1	1_35597834_T_G	35597834	Liu et al., 2022a
LG1	1_35597834_T_G	35597834	Liu et al., 2022a
LG1	1_35597834_T_G	35597834	Liu et al., 2022a
LG1	1_35597834_T_G	35597834	Liu et al., 2022a
LG1	1_35597834_T_G	35597834	Liu et al., 2022a
LG1	1_35597834_T_G	35597834	Liu et al., 2022a
LG1	1_35597834_T_G	35597834	Liu et al., 2022a
LG1	1_35597834_T_G	35597834	Liu et al., 2022a
LG1	1_35597834_T_G	35597834	Liu et al., 2022a
LG1	1_35597834_T_G	35597834	Liu et al., 2022a
LG1	1_35598308_C_T	35598308	Liu et al., 2022a
LG1	1_35598308_C_T	35598308	Liu et al., 2022a
LG1	1_35598308_C_T	35598308	Liu et al., 2022a
LG1	1_35598308_C_T	35598308	Liu et al., 2022a
LG1	1_35598308_C_T	35598308	Liu et al., 2022a
LG1	1_35598308_C_T	35598308	Liu et al., 2022a
LG1	1_35598308_C_T	35598308	Liu et al., 2022a
LG1	1_35598308_C_T	35598308	Liu et al., 2022a
LG1	1_35598308_C_T	35598308	Liu et al., 2022a
LG1	1_35598308_C_T	35598308	Liu et al., 2022a
LG1	1_35599079_A_T	35599079	Liu et al., 2022a
LG1	1_35601924_G_A	35601924	Liu et al., 2022a
LG1	1_35601924_G_A	35601924	Liu et al., 2022a
LG1	1_35601924_G_A	35601924	Liu et al., 2022a
LG1	1_35601924_G_A	35601924	Liu et al., 2022a
LG1	1_35602600_G_A	35602600	Liu et al., 2022a
LG1	1_35602624_C_T	35602624	Liu et al., 2022a
LG1	1_35602624_C_T	35602624	Liu et al., 2022a
LG1	1_35602624_C_T	35602624	Liu et al., 2022a
LG1	1_35602624_C_T	35602624	Liu et al., 2022a
LG1	1_35602624_C_T	35602624	Liu et al., 2022a
LG1	1_35602624_C_T	35602624	Liu et al., 2022a
LG1	1_35602926_C_T	35602926	Liu et al., 2022a
LG1	1_35602926_C_T	35602926	Liu et al., 2022a
LG1	1_35602926_C_T	35602926	Liu et al., 2022a
LG1	1_35602926_C_T	35602926	Liu et al., 2022a
LG1	1_35602926_C_T	35602926	Liu et al., 2022a
LG1	1_35602992_T_G	35602992	Liu et al., 2022a
LG1	1_35603472_T_C	35603472	Liu et al., 2022a
LG1	1_35603472_T_C	35603472	Liu et al., 2022a
LG1	1_35603472_T_C	35603472	Liu et al., 2022a
LG1	1_35603472_T_C	35603472	Liu et al., 2022a
LG1	1_35603472_T_C	35603472	Liu et al., 2022a
LG1	1_35603678_A_G	35603678	Liu et al., 2022a
LG1	1_35603806_A_G	35603806	Liu et al., 2022a
LG1	1_35603806_A_G	35603806	Liu et al., 2022a
LG1	1_35603806_A_G	35603806	Liu et al., 2022a
LG1	1_35603806_A_G	35603806	Liu et al., 2022a
LG1	1_35603806_A_G	35603806	Liu et al., 2022a
LG1	1_35606120_G_A	35606120	Liu et al., 2022a
LG1	1_35606120_G_A	35606120	Liu et al., 2022a
LG1	1_35606120_G_A	35606120	Liu et al., 2022a
LG1	1_35607737_G_C	35607737	Liu et al., 2022a
LG1	1_35607737_G_C	35607737	Liu et al., 2022a
LG1	1_35607737_G_C	35607737	Liu et al., 2022a
LG1	1_35607737_G_C	35607737	Liu et al., 2022a
LG1	1_35607737_G_C	35607737	Liu et al., 2022a
LG1	1_35607737_G_C	35607737	Liu et al., 2022a
LG1	1_35607895_C_T	35607895	Liu et al., 2022a
LG1	1_35607895_C_T	35607895	Liu et al., 2022a
LG1	1_35607895_C_T	35607895	Liu et al., 2022a
LG1	1_35607895_C_T	35607895	Liu et al., 2022a
LG1	1_35607895_C_T	35607895	Liu et al., 2022a
LG1	1_35607895_C_T	35607895	Liu et al., 2022a
LG1	1_35608285_C_G	35608285	Liu et al., 2022a
LG1	1_35608285_C_G	35608285	Liu et al., 2022a
LG1	1_35608292_G_A	35608292	Liu et al., 2022a
LG1	1_35608497_C_T	35608497	Liu et al., 2022a
LG1	1_35608497_C_T	35608497	Liu et al., 2022a
LG1	1_35608497_C_T	35608497	Liu et al., 2022a
LG1	1_35608497_C_T	35608497	Liu et al., 2022a
LG1	1_35608497_C_T	35608497	Liu et al., 2022a
LG1	1_35608497_C_T	35608497	Liu et al., 2022a
LG1	1_35608661_C_T	35608661	Liu et al., 2022a
LG1	1_35608661_C_T	35608661	Liu et al., 2022a
LG1	1_35608661_C_T	35608661	Liu et al., 2022a
LG1	1_35608661_C_T	35608661	Liu et al., 2022a
LG1	1_35608760_T_C	35608760	Liu et al., 2022a
LG1	1_35608760_T_C	35608760	Liu et al., 2022a
LG1	1_35608760_T_C	35608760	Liu et al., 2022a
LG1	1_35608760_T_C	35608760	Liu et al., 2022a
LG1	1_35608978_G_A	35608978	Liu et al., 2022a
LG1	1_35609063_A_G	35609063	Liu et al., 2022a
LG1	1_35609063_A_G	35609063	Liu et al., 2022a
LG1	1_35609063_A_G	35609063	Liu et al., 2022a
LG1	1_35609063_A_G	35609063	Liu et al., 2022a
LG1	1_35609063_A_G	35609063	Liu et al., 2022a
LG1	1_35609063_A_G	35609063	Liu et al., 2022a
LG1	1_35609380_T_A	35609380	Liu et al., 2022a
LG1	1_35609380_T_A	35609380	Liu et al., 2022a
LG1	1_35610851_G_C	35610851	Liu et al., 2022a
LG1	1_35610851_G_C	35610851	Liu et al., 2022a
LG1	1_35610851_G_C	35610851	Liu et al., 2022a
LG1	1_35610851_G_C	35610851	Liu et al., 2022a
LG1	1_35610851_G_C	35610851	Liu et al., 2022a
LG1	1_35610851_G_C	35610851	Liu et al., 2022a
LG1	1_35610853_C_T	35610853	Liu et al., 2022a
LG1	1_35610853_C_T	35610853	Liu et al., 2022a
LG1	1_35610853_C_T	35610853	Liu et al., 2022a
LG1	1_35610853_C_T	35610853	Liu et al., 2022a
LG1	1_35610853_C_T	35610853	Liu et al., 2022a
LG1	1_35610853_C_T	35610853	Liu et al., 2022a
LG1	1_35610908_G_A	35610908	Liu et al., 2022a
LG1	1_35610908_G_A	35610908	Liu et al., 2022a
LG1	1_35610928_C_T	35610928	Liu et al., 2022a
LG1	1_35610928_C_T	35610928	Liu et al., 2022a
LG1	1_35610943_C_A	35610943	Liu et al., 2022a
LG1	1_35610943_C_A	35610943	Liu et al., 2022a
LG1	1_35610943_C_A	35610943	Liu et al., 2022a
LG1	1_35610943_C_A	35610943	Liu et al., 2022a
LG1	1_35610943_C_A	35610943	Liu et al., 2022a
LG1	1_35610985_T_C	35610985	Liu et al., 2022a
LG1	1_35610996_G_A	35610996	Liu et al., 2022a
LG1	1_35610996_G_A	35610996	Liu et al., 2022a
LG1	1_35610996_G_A	35610996	Liu et al., 2022a
LG1	1_35610996_G_A	35610996	Liu et al., 2022a
LG1	1_35610996_G_A	35610996	Liu et al., 2022a
LG1	1_35611044_C_T	35611044	Liu et al., 2022a
LG1	1_35611044_C_T	35611044	Liu et al., 2022a
LG1	1_35611044_C_T	35611044	Liu et al., 2022a
LG1	1_35611044_C_T	35611044	Liu et al., 2022a
LG1	1_35611044_C_T	35611044	Liu et al., 2022a
LG1	1_35611397_G_A	35611397	Liu et al., 2022a
LG1	1_35611397_G_A	35611397	Liu et al., 2022a
LG1	1_35611397_G_A	35611397	Liu et al., 2022a
LG1	1_35611397_G_A	35611397	Liu et al., 2022a
LG1	1_35611397_G_A	35611397	Liu et al., 2022a
LG1	1_35611493_G_A	35611493	Liu et al., 2022a
LG1	1_35611493_G_A	35611493	Liu et al., 2022a
LG1	1_35611493_G_A	35611493	Liu et al., 2022a
LG1	1_35611493_G_A	35611493	Liu et al., 2022a
LG1	1_35611493_G_A	35611493	Liu et al., 2022a
LG1	1_35611516_C_T	35611516	Liu et al., 2022a
LG1	1_35611516_C_T	35611516	Liu et al., 2022a
LG1	1_35611516_C_T	35611516	Liu et al., 2022a
LG1	1_35611516_C_T	35611516	Liu et al., 2022a
LG1	1_35611516_C_T	35611516	Liu et al., 2022a
LG1	1_35611516_C_T	35611516	Liu et al., 2022a
LG1	1_35611516_C_T	35611516	Liu et al., 2022a
LG1	1_35611577_G_A	35611577	Liu et al., 2022a
LG1	1_35611577_G_A	35611577	Liu et al., 2022a
LG1	1_35611577_G_A	35611577	Liu et al., 2022a
LG1	1_35611577_G_A	35611577	Liu et al., 2022a
LG1	1_35611577_G_A	35611577	Liu et al., 2022a
LG1	1_35611668_A_C	35611668	Liu et al., 2022a
LG1	1_35611668_A_C	35611668	Liu et al., 2022a
LG1	1_35611668_A_C	35611668	Liu et al., 2022a
LG1	1_35611668_A_C	35611668	Liu et al., 2022a
LG1	1_35611668_A_C	35611668	Liu et al., 2022a
LG1	1_35611668_A_C	35611668	Liu et al., 2022a
LG1	1_35611860_C_T	35611860	Liu et al., 2022a
LG1	1_35611860_C_T	35611860	Liu et al., 2022a
LG1	1_35611860_C_T	35611860	Liu et al., 2022a
LG1	1_35611860_C_T	35611860	Liu et al., 2022a
LG1	1_35611860_C_T	35611860	Liu et al., 2022a
LG1	1_35611865_C_T	35611865	Liu et al., 2022a
LG1	1_35611865_C_T	35611865	Liu et al., 2022a
LG1	1_35611865_C_T	35611865	Liu et al., 2022a
LG1	1_35611865_C_T	35611865	Liu et al., 2022a
LG1	1_35611865_C_T	35611865	Liu et al., 2022a
LG1	1_35612256_G_A	35612256	Liu et al., 2022a
LG1	1_35612256_G_A	35612256	Liu et al., 2022a
LG1	1_35612256_G_A	35612256	Liu et al., 2022a
LG1	1_35612873_C_G	35612873	Liu et al., 2022a
LG1	1_35612873_C_G	35612873	Liu et al., 2022a
LG1	1_35612873_C_G	35612873	Liu et al., 2022a
LG1	1_35612873_C_G	35612873	Liu et al., 2022a
LG1	1_35612873_C_G	35612873	Liu et al., 2022a
LG1	1_35612873_C_G	35612873	Liu et al., 2022a
LG1	1_35612873_C_G	35612873	Liu et al., 2022a
LG1	1_35612873_C_G	35612873	Liu et al., 2022a
LG1	1_35612873_C_G	35612873	Liu et al., 2022a
LG1	1_35612873_C_G	35612873	Liu et al., 2022a
LG1	1_35612873_C_G	35612873	Liu et al., 2022a
LG1	1_35612873_C_G	35612873	Liu et al., 2022a
LG1	1_35612901_G_C	35612901	Liu et al., 2022a
LG1	1_35612901_G_C	35612901	Liu et al., 2022a
LG1	1_35612901_G_C	35612901	Liu et al., 2022a
LG1	1_35612901_G_C	35612901	Liu et al., 2022a
LG1	1_35612901_G_C	35612901	Liu et al., 2022a
LG1	1_35612901_G_C	35612901	Liu et al., 2022a
LG1	1_35612901_G_C	35612901	Liu et al., 2022a
LG1	1_35612901_G_C	35612901	Liu et al., 2022a
LG1	1_35612901_G_C	35612901	Liu et al., 2022a
LG1	1_35612901_G_C	35612901	Liu et al., 2022a
LG1	1_35612901_G_C	35612901	Liu et al., 2022a
LG1	1_35612901_G_C	35612901	Liu et al., 2022a
LG1	1_35613068_A_G	35613068	Liu et al., 2022a
LG1	1_35613086_G_C	35613086	Liu et al., 2022a
LG1	1_35613086_G_C	35613086	Liu et al., 2022a
LG1	1_35613086_G_C	35613086	Liu et al., 2022a
LG1	1_35613086_G_C	35613086	Liu et al., 2022a
LG1	1_35613086_G_C	35613086	Liu et al., 2022a
LG1	1_35613086_G_C	35613086	Liu et al., 2022a
LG1	1_35613086_G_C	35613086	Liu et al., 2022a
LG1	1_35613086_G_C	35613086	Liu et al., 2022a
LG1	1_35613086_G_C	35613086	Liu et al., 2022a
LG1	1_35613086_G_C	35613086	Liu et al., 2022a
LG1	1_35613086_G_C	35613086	Liu et al., 2022a
LG1	1_35613086_G_C	35613086	Liu et al., 2022a
LG1	1_35613113_T_C	35613113	Liu et al., 2022a
LG1	1_35613113_T_C	35613113	Liu et al., 2022a
LG1	1_35613132_C_T	35613132	Liu et al., 2022a
LG1	1_35613132_C_T	35613132	Liu et al., 2022a
LG1	1_35613132_C_T	35613132	Liu et al., 2022a
LG1	1_35613132_C_T	35613132	Liu et al., 2022a
LG1	1_35613132_C_T	35613132	Liu et al., 2022a
LG1	1_35613132_C_T	35613132	Liu et al., 2022a
LG1	1_35613132_C_T	35613132	Liu et al., 2022a
LG1	1_35613132_C_T	35613132	Liu et al., 2022a
LG1	1_35613132_C_T	35613132	Liu et al., 2022a
LG1	1_35613132_C_T	35613132	Liu et al., 2022a
LG1	1_35613132_C_T	35613132	Liu et al., 2022a
LG1	1_35613132_C_T	35613132	Liu et al., 2022a
LG1	1_35613175_C_T	35613175	Liu et al., 2022a
LG1	1_35613175_C_T	35613175	Liu et al., 2022a
LG1	1_35613175_C_T	35613175	Liu et al., 2022a
LG1	1_35613175_C_T	35613175	Liu et al., 2022a
LG1	1_35613175_C_T	35613175	Liu et al., 2022a
LG1	1_35613175_C_T	35613175	Liu et al., 2022a
LG1	1_35614141_G_A	35614141	Liu et al., 2022a
LG1	1_35614288_T_A	35614288	Liu et al., 2022a
LG1	1_35614288_T_A	35614288	Liu et al., 2022a
LG1	1_35614288_T_A	35614288	Liu et al., 2022a
LG1	1_35614288_T_A	35614288	Liu et al., 2022a
LG1	1_35614288_T_A	35614288	Liu et al., 2022a
LG1	1_35614288_T_A	35614288	Liu et al., 2022a
LG1	1_35615687_C_A	35615687	Liu et al., 2022a
LG1	1_35615687_C_A	35615687	Liu et al., 2022a
LG1	1_35615687_C_A	35615687	Liu et al., 2022a
LG1	1_35615687_C_A	35615687	Liu et al., 2022a
LG1	1_35615687_C_A	35615687	Liu et al., 2022a
LG1	1_35615687_C_A	35615687	Liu et al., 2022a
LG1	1_35615747_C_T	35615747	Liu et al., 2022a
LG1	1_35615747_C_T	35615747	Liu et al., 2022a
LG1	1_35615747_C_T	35615747	Liu et al., 2022a
LG1	1_35615747_C_T	35615747	Liu et al., 2022a
LG1	1_35615747_C_T	35615747	Liu et al., 2022a
LG1	1_35615747_C_T	35615747	Liu et al., 2022a
LG1	1_35616016_A_C	35616016	Liu et al., 2022a
LG1	1_35616016_A_C	35616016	Liu et al., 2022a
LG1	1_35616016_A_C	35616016	Liu et al., 2022a
LG1	1_35616016_A_C	35616016	Liu et al., 2022a
LG1	1_35616016_A_C	35616016	Liu et al., 2022a
LG1	1_35616016_A_C	35616016	Liu et al., 2022a
LG1	1_35616056_A_C	35616056	Liu et al., 2022a
LG1	1_35616056_A_C	35616056	Liu et al., 2022a
LG1	1_35616056_A_C	35616056	Liu et al., 2022a
LG1	1_35616056_A_C	35616056	Liu et al., 2022a
LG1	1_35616056_A_C	35616056	Liu et al., 2022a
LG1	1_35616056_A_C	35616056	Liu et al., 2022a
LG1	1_35616383_G_A	35616383	Liu et al., 2022a
LG1	1_35616477_T_C	35616477	Liu et al., 2022a
LG1	1_35616477_T_C	35616477	Liu et al., 2022a
LG1	1_35616477_T_C	35616477	Liu et al., 2022a
LG1	1_35616477_T_C	35616477	Liu et al., 2022a
LG1	1_35616477_T_C	35616477	Liu et al., 2022a
LG1	1_35616477_T_C	35616477	Liu et al., 2022a
LG1	1_35616477_T_C	35616477	Liu et al., 2022a
LG1	1_35616477_T_C	35616477	Liu et al., 2022a
LG1	1_35616477_T_C	35616477	Liu et al., 2022a
LG1	1_35616477_T_C	35616477	Liu et al., 2022a
LG1	1_35619525_C_T	35619525	Liu et al., 2022a
LG1	1_35619525_C_T	35619525	Liu et al., 2022a
LG1	1_35619525_C_T	35619525	Liu et al., 2022a
LG1	1_35619525_C_T	35619525	Liu et al., 2022a
LG1	1_35620135_A_T	35620135	Liu et al., 2022a
LG1	1_35620149_G_C	35620149	Liu et al., 2022a
LG1	1_35620226_G_A	35620226	Liu et al., 2022a
LG1	1_35620226_G_A	35620226	Liu et al., 2022a
LG1	1_35620328_A_C	35620328	Liu et al., 2022a
LG1	1_35620328_A_C	35620328	Liu et al., 2022a
LG1	1_35620328_A_C	35620328	Liu et al., 2022a
LG1	1_35620411_C_T	35620411	Liu et al., 2022a
LG1	1_35620411_C_T	35620411	Liu et al., 2022a
LG1	1_35620411_C_T	35620411	Liu et al., 2022a
LG1	1_35620411_C_T	35620411	Liu et al., 2022a
LG1	1_35620411_C_T	35620411	Liu et al., 2022a
LG1	1_35620444_A_T	35620444	Liu et al., 2022a
LG1	1_35620444_A_T	35620444	Liu et al., 2022a
LG1	1_35620444_A_T	35620444	Liu et al., 2022a
LG1	1_35620444_A_T	35620444	Liu et al., 2022a
LG1	1_35620444_A_T	35620444	Liu et al., 2022a
LG1	1_35620467_A_C	35620467	Liu et al., 2022a
LG1	1_35620467_A_C	35620467	Liu et al., 2022a
LG1	1_35620467_A_C	35620467	Liu et al., 2022a
LG1	1_35620467_A_C	35620467	Liu et al., 2022a
LG1	1_35620467_A_C	35620467	Liu et al., 2022a
LG1	1_35620730_T_C	35620730	Liu et al., 2022a
LG1	1_35620730_T_C	35620730	Liu et al., 2022a
LG1	1_35620730_T_C	35620730	Liu et al., 2022a
LG1	1_35620730_T_C	35620730	Liu et al., 2022a
LG1	1_35620730_T_C	35620730	Liu et al., 2022a
LG1	1_35620730_T_C	35620730	Liu et al., 2022a
LG1	1_35622769_C_G	35622769	Liu et al., 2022a
LG1	1_35622769_C_G	35622769	Liu et al., 2022a
LG1	1_35622769_C_G	35622769	Liu et al., 2022a
LG1	1_35622769_C_G	35622769	Liu et al., 2022a
LG1	1_35622769_C_G	35622769	Liu et al., 2022a
LG1	1_35622769_C_G	35622769	Liu et al., 2022a
LG1	1_35623534_G_T	35623534	Liu et al., 2022a
LG1	1_35623534_G_T	35623534	Liu et al., 2022a
LG1	1_35623534_G_T	35623534	Liu et al., 2022a
LG1	1_35623534_G_T	35623534	Liu et al., 2022a
LG1	1_35623534_G_T	35623534	Liu et al., 2022a
LG1	1_35623534_G_T	35623534	Liu et al., 2022a
LG1	1_35623534_G_T	35623534	Liu et al., 2022a
LG1	1_35623534_G_T	35623534	Liu et al., 2022a
LG1	1_35623534_G_T	35623534	Liu et al., 2022a
LG1	1_35623534_G_T	35623534	Liu et al., 2022a
LG1	1_35623534_G_T	35623534	Liu et al., 2022a
LG1	1_35623534_G_T	35623534	Liu et al., 2022a
LG1	1_35623534_G_T	35623534	Liu et al., 2022a
LG1	1_35623534_G_T	35623534	Liu et al., 2022a
LG1	1_35623534_G_T	35623534	Liu et al., 2022a
LG1	1_35623534_G_T	35623534	Liu et al., 2022a
LG1	1_35623534_G_T	35623534	Liu et al., 2022a
LG1	1_35623534_G_T	35623534	Liu et al., 2022a
LG1	1_35623534_G_T	35623534	Liu et al., 2022a
LG1	1_35623534_G_T	35623534	Liu et al., 2022a
LG1	1_35623534_G_T	35623534	Liu et al., 2022a
LG1	1_35623534_G_T	35623534	Liu et al., 2022a
LG1	1_35623534_G_T	35623534	Liu et al., 2022a
LG1	1_35623534_G_T	35623534	Liu et al., 2022a
LG1	1_35623594_C_T	35623594	Liu et al., 2022a
LG1	1_35623594_C_T	35623594	Liu et al., 2022a
LG1	1_35623594_C_T	35623594	Liu et al., 2022a
LG1	1_35623594_C_T	35623594	Liu et al., 2022a
LG1	1_35623594_C_T	35623594	Liu et al., 2022a
LG1	1_35623594_C_T	35623594	Liu et al., 2022a
LG1	1_35623594_C_T	35623594	Liu et al., 2022a
LG1	1_35623594_C_T	35623594	Liu et al., 2022a
LG1	1_35623594_C_T	35623594	Liu et al., 2022a
LG1	1_35623594_C_T	35623594	Liu et al., 2022a
LG1	1_35623594_C_T	35623594	Liu et al., 2022a
LG1	1_35623594_C_T	35623594	Liu et al., 2022a
LG1	1_35623594_C_T	35623594	Liu et al., 2022a
LG1	1_35623594_C_T	35623594	Liu et al., 2022a
LG1	1_35623594_C_T	35623594	Liu et al., 2022a
LG1	1_35623594_C_T	35623594	Liu et al., 2022a
LG1	1_35623594_C_T	35623594	Liu et al., 2022a
LG1	1_35623594_C_T	35623594	Liu et al., 2022a
LG1	1_35623594_C_T	35623594	Liu et al., 2022a
LG1	1_35623594_C_T	35623594	Liu et al., 2022a
LG1	1_35623594_C_T	35623594	Liu et al., 2022a
LG1	1_35623594_C_T	35623594	Liu et al., 2022a
LG1	1_35623594_C_T	35623594	Liu et al., 2022a
LG1	1_35623594_C_T	35623594	Liu et al., 2022a
LG1	1_35630722_T_A	35630722	Liu et al., 2022a
LG1	1_35630722_T_A	35630722	Liu et al., 2022a
LG1	1_35630764_G_T	35630764	Liu et al., 2022a
LG1	1_35630764_G_T	35630764	Liu et al., 2022a
LG1	1_35630764_G_T	35630764	Liu et al., 2022a
LG1	1_35630772_A_G	35630772	Liu et al., 2022a
LG1	1_35630772_A_G	35630772	Liu et al., 2022a
LG1	1_35630808_T_C	35630808	Liu et al., 2022a
LG1	1_35630808_T_C	35630808	Liu et al., 2022a
LG1	1_35633495_C_T	35633495	Liu et al., 2022a
LG1	1_35633551_T_A	35633551	Liu et al., 2022a
LG1	1_35637768_C_T	35637768	Liu et al., 2022a
LG1	1_35637768_C_T	35637768	Liu et al., 2022a
LG1	1_35637768_C_T	35637768	Liu et al., 2022a
LG1	1_35637768_C_T	35637768	Liu et al., 2022a
LG1	1_35637768_C_T	35637768	Liu et al., 2022a
LG1	1_35637768_C_T	35637768	Liu et al., 2022a
LG1	1_35640989_G_A	35640989	Liu et al., 2022a
LG1	1_35640989_G_A	35640989	Liu et al., 2022a
LG1	1_35642645_T_C	35642645	Liu et al., 2022a
LG1	1_35642645_T_C	35642645	Liu et al., 2022a
LG1	1_35642645_T_C	35642645	Liu et al., 2022a
LG1	1_35642645_T_C	35642645	Liu et al., 2022a
LG1	1_35642645_T_C	35642645	Liu et al., 2022a
LG1	1_35642645_T_C	35642645	Liu et al., 2022a
LG1	1_35643266_T_G	35643266	Liu et al., 2022a
LG1	1_35644170_G_A	35644170	Liu et al., 2022a
LG1	1_35644170_G_A	35644170	Liu et al., 2022a
LG1	1_35644170_G_A	35644170	Liu et al., 2022a
LG1	1_35644170_G_A	35644170	Liu et al., 2022a
LG1	1_35644170_G_A	35644170	Liu et al., 2022a
LG1	1_35644170_G_A	35644170	Liu et al., 2022a
LG1	1_35644170_G_A	35644170	Liu et al., 2022a
LG1	1_35644170_G_A	35644170	Liu et al., 2022a
LG1	1_35644170_G_A	35644170	Liu et al., 2022a
LG1	1_35644170_G_A	35644170	Liu et al., 2022a
LG1	1_35644170_G_A	35644170	Liu et al., 2022a
LG1	1_35644170_G_A	35644170	Liu et al., 2022a
LG1	1_35644264_T_C	35644264	Liu et al., 2022a
LG1	1_35644264_T_C	35644264	Liu et al., 2022a
LG1	1_35644264_T_C	35644264	Liu et al., 2022a
LG1	1_35644264_T_C	35644264	Liu et al., 2022a
LG1	1_35644264_T_C	35644264	Liu et al., 2022a
LG1	1_35645032_A_T	35645032	Liu et al., 2022a
LG1	1_35645032_A_T	35645032	Liu et al., 2022a
LG1	1_35645032_A_T	35645032	Liu et al., 2022a
LG1	1_35645032_A_T	35645032	Liu et al., 2022a
LG1	1_35645032_A_T	35645032	Liu et al., 2022a
LG1	1_35645613_C_T	35645613	Liu et al., 2022a
LG1	1_35645613_C_T	35645613	Liu et al., 2022a
LG1	1_35645613_C_T	35645613	Liu et al., 2022a
LG1	1_35645613_C_T	35645613	Liu et al., 2022a
LG1	1_35645613_C_T	35645613	Liu et al., 2022a
LG1	1_35646244_C_A	35646244	Liu et al., 2022a
LG1	1_35646244_C_A	35646244	Liu et al., 2022a
LG1	1_35646340_G_A	35646340	Liu et al., 2022a
LG1	1_35646340_G_A	35646340	Liu et al., 2022a
LG1	1_35648385_C_T	35648385	Liu et al., 2022a
LG1	1_35648385_C_T	35648385	Liu et al., 2022a
LG1	1_35648385_C_T	35648385	Liu et al., 2022a
LG1	1_35648385_C_T	35648385	Liu et al., 2022a
LG1	1_35648385_C_T	35648385	Liu et al., 2022a
LG1	1_35648520_G_A	35648520	Liu et al., 2022a
LG1	1_35649132_A_T	35649132	Liu et al., 2022a
LG1	1_35649132_A_T	35649132	Liu et al., 2022a
LG1	1_35649132_A_T	35649132	Liu et al., 2022a
LG1	1_35649132_A_T	35649132	Liu et al., 2022a
LG1	1_35649132_A_T	35649132	Liu et al., 2022a
LG1	1_35649136_C_A	35649136	Liu et al., 2022a
LG1	1_35649144_T_A	35649144	Liu et al., 2022a
LG1	1_35649154_T_G	35649154	Liu et al., 2022a
LG1	1_35649154_T_G	35649154	Liu et al., 2022a
LG1	1_35649154_T_G	35649154	Liu et al., 2022a
LG1	1_35649154_T_G	35649154	Liu et al., 2022a
LG1	1_35649154_T_G	35649154	Liu et al., 2022a
LG1	1_35649198_C_G	35649198	Liu et al., 2022a
LG1	1_35649198_C_G	35649198	Liu et al., 2022a
LG1	1_35649198_C_G	35649198	Liu et al., 2022a
LG1	1_35649198_C_G	35649198	Liu et al., 2022a
LG1	1_35649198_C_G	35649198	Liu et al., 2022a
LG1	1_35649229_G_A	35649229	Liu et al., 2022a
LG1	1_35649469_T_A	35649469	Liu et al., 2022a
LG1	1_35649469_T_A	35649469	Liu et al., 2022a
LG1	1_35649469_T_A	35649469	Liu et al., 2022a
LG1	1_35649469_T_A	35649469	Liu et al., 2022a
LG1	1_35649469_T_A	35649469	Liu et al., 2022a
LG1	1_35649469_T_A	35649469	Liu et al., 2022a
LG1	1_35649782_C_T	35649782	Liu et al., 2022a
LG1	1_35649782_C_T	35649782	Liu et al., 2022a
LG1	1_35649782_C_T	35649782	Liu et al., 2022a
LG1	1_35649782_C_T	35649782	Liu et al., 2022a
LG1	1_35649782_C_T	35649782	Liu et al., 2022a
LG1	1_35649782_C_T	35649782	Liu et al., 2022a
LG1	1_35650007_T_A	35650007	Liu et al., 2022a
LG1	1_35650007_T_A	35650007	Liu et al., 2022a
LG1	1_35650007_T_A	35650007	Liu et al., 2022a
LG1	1_35650007_T_A	35650007	Liu et al., 2022a
LG1	1_35650007_T_A	35650007	Liu et al., 2022a
LG1	1_35650007_T_A	35650007	Liu et al., 2022a
LG1	1_35651753_C_T	35651753	Liu et al., 2022a
LG1	1_35651753_C_T	35651753	Liu et al., 2022a
LG1	1_35651753_C_T	35651753	Liu et al., 2022a
LG1	1_35651753_C_T	35651753	Liu et al., 2022a
LG1	1_35651753_C_T	35651753	Liu et al., 2022a
LG1	1_35651753_C_T	35651753	Liu et al., 2022a
LG1	1_35651753_C_T	35651753	Liu et al., 2022a
LG1	1_35651753_C_T	35651753	Liu et al., 2022a
LG1	1_35651753_C_T	35651753	Liu et al., 2022a
LG1	1_35651753_C_T	35651753	Liu et al., 2022a
LG1	1_35651753_C_T	35651753	Liu et al., 2022a
LG1	1_35651753_C_T	35651753	Liu et al., 2022a
LG1	1_35651753_C_T	35651753	Liu et al., 2022a
LG1	1_35651753_C_T	35651753	Liu et al., 2022a
LG1	1_35651753_C_T	35651753	Liu et al., 2022a
LG1	1_35651753_C_T	35651753	Liu et al., 2022a
LG1	1_35651753_C_T	35651753	Liu et al., 2022a
LG1	1_35651753_C_T	35651753	Liu et al., 2022a
LG1	1_35651761_C_T	35651761	Liu et al., 2022a
LG1	1_35651761_C_T	35651761	Liu et al., 2022a
LG1	1_35651761_C_T	35651761	Liu et al., 2022a
LG1	1_35651761_C_T	35651761	Liu et al., 2022a
LG1	1_35651761_C_T	35651761	Liu et al., 2022a
LG1	1_35651761_C_T	35651761	Liu et al., 2022a
LG1	1_35651761_C_T	35651761	Liu et al., 2022a
LG1	1_35651761_C_T	35651761	Liu et al., 2022a
LG1	1_35651761_C_T	35651761	Liu et al., 2022a
LG1	1_35651761_C_T	35651761	Liu et al., 2022a
LG1	1_35651761_C_T	35651761	Liu et al., 2022a
LG1	1_35651761_C_T	35651761	Liu et al., 2022a
LG1	1_35651761_C_T	35651761	Liu et al., 2022a
LG1	1_35651761_C_T	35651761	Liu et al., 2022a
LG1	1_35651761_C_T	35651761	Liu et al., 2022a
LG1	1_35651761_C_T	35651761	Liu et al., 2022a
LG1	1_35651761_C_T	35651761	Liu et al., 2022a
LG1	1_35651761_C_T	35651761	Liu et al., 2022a
LG1	1_35651764_T_A	35651764	Liu et al., 2022a
LG1	1_35651764_T_A	35651764	Liu et al., 2022a
LG1	1_35651764_T_A	35651764	Liu et al., 2022a
LG1	1_35651764_T_A	35651764	Liu et al., 2022a
LG1	1_35651764_T_A	35651764	Liu et al., 2022a
LG1	1_35651764_T_A	35651764	Liu et al., 2022a
LG1	1_35651764_T_A	35651764	Liu et al., 2022a
LG1	1_35651764_T_A	35651764	Liu et al., 2022a
LG1	1_35651764_T_A	35651764	Liu et al., 2022a
LG1	1_35651764_T_A	35651764	Liu et al., 2022a
LG1	1_35651764_T_A	35651764	Liu et al., 2022a
LG1	1_35651764_T_A	35651764	Liu et al., 2022a
LG1	1_35651764_T_A	35651764	Liu et al., 2022a
LG1	1_35651764_T_A	35651764	Liu et al., 2022a
LG1	1_35651764_T_A	35651764	Liu et al., 2022a
LG1	1_35651919_A_T	35651919	Liu et al., 2022a
LG1	1_35651919_A_T	35651919	Liu et al., 2022a
LG1	1_35651919_A_T	35651919	Liu et al., 2022a
LG1	1_35651919_A_T	35651919	Liu et al., 2022a
LG1	1_35651919_A_T	35651919	Liu et al., 2022a
LG1	1_35651919_A_T	35651919	Liu et al., 2022a
LG1	1_35652663_G_A	35652663	Liu et al., 2022a
LG1	1_35652663_G_A	35652663	Liu et al., 2022a
LG1	1_35652663_G_A	35652663	Liu et al., 2022a
LG1	1_35652663_G_A	35652663	Liu et al., 2022a
LG1	1_35652663_G_A	35652663	Liu et al., 2022a
LG1	1_35652663_G_A	35652663	Liu et al., 2022a
LG1	1_35652663_G_A	35652663	Liu et al., 2022a
LG1	1_35652663_G_A	35652663	Liu et al., 2022a
LG1	1_35652663_G_A	35652663	Liu et al., 2022a
LG1	1_35652663_G_A	35652663	Liu et al., 2022a
LG1	1_35652663_G_A	35652663	Liu et al., 2022a
LG1	1_35652663_G_A	35652663	Liu et al., 2022a
LG1	1_35652663_G_A	35652663	Liu et al., 2022a
LG1	1_35652663_G_A	35652663	Liu et al., 2022a
LG1	1_35652663_G_A	35652663	Liu et al., 2022a
LG1	1_35652663_G_A	35652663	Liu et al., 2022a
LG1	1_35652663_G_A	35652663	Liu et al., 2022a
LG1	1_35652663_G_A	35652663	Liu et al., 2022a
LG1	1_35652663_G_A	35652663	Liu et al., 2022a
LG1	1_35652663_G_A	35652663	Liu et al., 2022a
LG1	1_35652663_G_A	35652663	Liu et al., 2022a
LG1	1_35652663_G_A	35652663	Liu et al., 2022a
LG1	1_35652663_G_A	35652663	Liu et al., 2022a
LG1	1_35652663_G_A	35652663	Liu et al., 2022a
LG1	1_35656764_T_C	35656764	Liu et al., 2022a
LG1	1_35656764_T_C	35656764	Liu et al., 2022a
LG1	1_35657135_G_C	35657135	Liu et al., 2022a
LG1	1_35657135_G_C	35657135	Liu et al., 2022a
LG1	1_35657135_G_C	35657135	Liu et al., 2022a
LG1	1_35657135_G_C	35657135	Liu et al., 2022a
LG1	1_35657135_G_C	35657135	Liu et al., 2022a
LG1	1_35657135_G_C	35657135	Liu et al., 2022a
LG1	1_35657191_A_G	35657191	Liu et al., 2022a
LG1	1_35657191_A_G	35657191	Liu et al., 2022a
LG1	1_35657191_A_G	35657191	Liu et al., 2022a
LG1	1_35657191_A_G	35657191	Liu et al., 2022a
LG1	1_35657191_A_G	35657191	Liu et al., 2022a
LG1	1_35657208_C_G	35657208	Liu et al., 2022a
LG1	1_35657284_A_C	35657284	Liu et al., 2022a
LG1	1_35657284_A_C	35657284	Liu et al., 2022a
LG1	1_35657284_A_C	35657284	Liu et al., 2022a
LG1	1_35657284_A_C	35657284	Liu et al., 2022a
LG1	1_35657284_A_C	35657284	Liu et al., 2022a
LG1	1_35657284_A_C	35657284	Liu et al., 2022a
LG1	1_35657284_A_C	35657284	Liu et al., 2022a
LG1	1_35657284_A_C	35657284	Liu et al., 2022a
LG1	1_35657284_A_C	35657284	Liu et al., 2022a
LG1	1_35657284_A_C	35657284	Liu et al., 2022a
LG1	1_35658866_C_T	35658866	Liu et al., 2022a
LG1	1_35658866_C_T	35658866	Liu et al., 2022a
LG1	1_35658866_C_T	35658866	Liu et al., 2022a
LG1	1_35658866_C_T	35658866	Liu et al., 2022a
LG1	1_35658866_C_T	35658866	Liu et al., 2022a
LG1	1_35663116_A_G	35663116	Liu et al., 2022a
LG1	1_35663116_A_G	35663116	Liu et al., 2022a
LG1	1_35663116_A_G	35663116	Liu et al., 2022a
LG1	1_35663116_A_G	35663116	Liu et al., 2022a
LG1	1_35663116_A_G	35663116	Liu et al., 2022a
LG1	1_35663116_A_G	35663116	Liu et al., 2022a
LG1	1_35663133_G_T	35663133	Liu et al., 2022a
LG1	1_35663133_G_T	35663133	Liu et al., 2022a
LG1	1_35663133_G_T	35663133	Liu et al., 2022a
LG1	1_35663133_G_T	35663133	Liu et al., 2022a
LG1	1_35663133_G_T	35663133	Liu et al., 2022a
LG1	1_35663133_G_T	35663133	Liu et al., 2022a
LG1	1_35663134_G_A	35663134	Liu et al., 2022a
LG1	1_35663134_G_A	35663134	Liu et al., 2022a
LG1	1_35663134_G_A	35663134	Liu et al., 2022a
LG1	1_35663134_G_A	35663134	Liu et al., 2022a
LG1	1_35663134_G_A	35663134	Liu et al., 2022a
LG1	1_35663134_G_A	35663134	Liu et al., 2022a
LG1	1_35663157_G_A	35663157	Liu et al., 2022a
LG1	1_35663157_G_A	35663157	Liu et al., 2022a
LG1	1_35663157_G_A	35663157	Liu et al., 2022a
LG1	1_35663157_G_A	35663157	Liu et al., 2022a
LG1	1_35663157_G_A	35663157	Liu et al., 2022a
LG1	1_35663177_C_T	35663177	Liu et al., 2022a
LG1	1_35663177_C_T	35663177	Liu et al., 2022a
LG1	1_35663177_C_T	35663177	Liu et al., 2022a
LG1	1_35663177_C_T	35663177	Liu et al., 2022a
LG1	1_35663177_C_T	35663177	Liu et al., 2022a
LG1	1_35663177_C_T	35663177	Liu et al., 2022a
LG1	1_35663181_G_A	35663181	Liu et al., 2022a
LG1	1_35663181_G_A	35663181	Liu et al., 2022a
LG1	1_35663181_G_A	35663181	Liu et al., 2022a
LG1	1_35663181_G_A	35663181	Liu et al., 2022a
LG1	1_35663181_G_A	35663181	Liu et al., 2022a
LG1	1_35663181_G_A	35663181	Liu et al., 2022a
LG1	1_35663232_A_G	35663232	Liu et al., 2022a
LG1	1_35663232_A_G	35663232	Liu et al., 2022a
LG1	1_35663232_A_G	35663232	Liu et al., 2022a
LG1	1_35663232_A_G	35663232	Liu et al., 2022a
LG1	1_35663232_A_G	35663232	Liu et al., 2022a
LG1	1_35663232_A_G	35663232	Liu et al., 2022a
LG1	1_35663311_T_C	35663311	Liu et al., 2022a
LG1	1_35663311_T_C	35663311	Liu et al., 2022a
LG1	1_35663311_T_C	35663311	Liu et al., 2022a
LG1	1_35663311_T_C	35663311	Liu et al., 2022a
LG1	1_35663311_T_C	35663311	Liu et al., 2022a
LG1	1_35663393_A_G	35663393	Liu et al., 2022a
LG1	1_35663393_A_G	35663393	Liu et al., 2022a
LG1	1_35663393_A_G	35663393	Liu et al., 2022a
LG1	1_35663413_C_T	35663413	Liu et al., 2022a
LG1	1_35663413_C_T	35663413	Liu et al., 2022a
LG1	1_35663436_T_C	35663436	Liu et al., 2022a
LG1	1_35663436_T_C	35663436	Liu et al., 2022a
LG1	1_35663436_T_C	35663436	Liu et al., 2022a
LG1	1_35663436_T_C	35663436	Liu et al., 2022a
LG1	1_35663436_T_C	35663436	Liu et al., 2022a
LG1	1_35663436_T_C	35663436	Liu et al., 2022a
LG1	1_35663591_A_G	35663591	Liu et al., 2022a
LG1	1_35663591_A_G	35663591	Liu et al., 2022a
LG1	1_35663591_A_G	35663591	Liu et al., 2022a
LG1	1_35663591_A_G	35663591	Liu et al., 2022a
LG1	1_35663591_A_G	35663591	Liu et al., 2022a
LG1	1_35663591_A_G	35663591	Liu et al., 2022a
LG1	1_35663669_T_C	35663669	Liu et al., 2022a
LG1	1_35663669_T_C	35663669	Liu et al., 2022a
LG1	1_35663669_T_C	35663669	Liu et al., 2022a
LG1	1_35663702_A_G	35663702	Liu et al., 2022a
LG1	1_35663702_A_G	35663702	Liu et al., 2022a
LG1	1_35663702_A_G	35663702	Liu et al., 2022a
LG1	1_35663702_A_G	35663702	Liu et al., 2022a
LG1	1_35663702_A_G	35663702	Liu et al., 2022a
LG1	1_35663702_A_G	35663702	Liu et al., 2022a
LG1	1_35663898_T_C	35663898	Liu et al., 2022a
LG1	1_35663898_T_C	35663898	Liu et al., 2022a
LG1	1_35663898_T_C	35663898	Liu et al., 2022a
LG1	1_35663898_T_C	35663898	Liu et al., 2022a
LG1	1_35663898_T_C	35663898	Liu et al., 2022a
LG1	1_35665955_A_C	35665955	Liu et al., 2022a
LG1	1_35665955_A_C	35665955	Liu et al., 2022a
LG1	1_35665955_A_C	35665955	Liu et al., 2022a
LG1	1_35665955_A_C	35665955	Liu et al., 2022a
LG1	1_35665955_A_C	35665955	Liu et al., 2022a
LG1	1_35665955_A_C	35665955	Liu et al., 2022a
LG1	1_35665955_A_C	35665955	Liu et al., 2022a
LG1	1_35665955_A_C	35665955	Liu et al., 2022a
LG1	1_35665955_A_C	35665955	Liu et al., 2022a
LG1	1_35665955_A_C	35665955	Liu et al., 2022a
LG1	1_35665955_A_C	35665955	Liu et al., 2022a
LG1	1_35665955_A_C	35665955	Liu et al., 2022a
LG1	1_35666754_C_T	35666754	Liu et al., 2022a
LG1	1_35666754_C_T	35666754	Liu et al., 2022a
LG1	1_35666762_A_T	35666762	Liu et al., 2022a
LG1	1_35666762_A_T	35666762	Liu et al., 2022a
LG1	1_35666762_A_T	35666762	Liu et al., 2022a
LG1	1_35666762_A_T	35666762	Liu et al., 2022a
LG1	1_35666762_A_T	35666762	Liu et al., 2022a
LG1	1_35666762_A_T	35666762	Liu et al., 2022a
LG1	1_35666762_A_T	35666762	Liu et al., 2022a
LG1	1_35666762_A_T	35666762	Liu et al., 2022a
LG1	1_35666762_A_T	35666762	Liu et al., 2022a
LG1	1_35666762_A_T	35666762	Liu et al., 2022a
LG1	1_35666784_A_G	35666784	Liu et al., 2022a
LG1	1_35666784_A_G	35666784	Liu et al., 2022a
LG1	1_35666784_A_G	35666784	Liu et al., 2022a
LG1	1_35666784_A_G	35666784	Liu et al., 2022a
LG1	1_35666784_A_G	35666784	Liu et al., 2022a
LG1	1_35666784_A_G	35666784	Liu et al., 2022a
LG1	1_35666784_A_G	35666784	Liu et al., 2022a
LG1	1_35666784_A_G	35666784	Liu et al., 2022a
LG1	1_35666784_A_G	35666784	Liu et al., 2022a
LG1	1_35666784_A_G	35666784	Liu et al., 2022a
LG1	1_35666784_A_G	35666784	Liu et al., 2022a
LG1	1_35666784_A_G	35666784	Liu et al., 2022a
LG1	1_35666991_G_T	35666991	Liu et al., 2022a
LG1	1_35666991_G_T	35666991	Liu et al., 2022a
LG1	1_35666991_G_T	35666991	Liu et al., 2022a
LG1	1_35666991_G_T	35666991	Liu et al., 2022a
LG1	1_35666991_G_T	35666991	Liu et al., 2022a
LG1	1_35666991_G_T	35666991	Liu et al., 2022a
LG1	1_35666991_G_T	35666991	Liu et al., 2022a
LG1	1_35666991_G_T	35666991	Liu et al., 2022a
LG1	1_35666991_G_T	35666991	Liu et al., 2022a
LG1	1_35666991_G_T	35666991	Liu et al., 2022a
LG1	1_35666991_G_T	35666991	Liu et al., 2022a
LG1	1_35666991_G_T	35666991	Liu et al., 2022a
LG1	1_35666991_G_T	35666991	Liu et al., 2022a
LG1	1_35666991_G_T	35666991	Liu et al., 2022a
LG1	1_35666991_G_T	35666991	Liu et al., 2022a
LG1	1_35666991_G_T	35666991	Liu et al., 2022a
LG1	1_35666991_G_T	35666991	Liu et al., 2022a
LG1	1_35666991_G_T	35666991	Liu et al., 2022a
LG1	1_35666991_G_T	35666991	Liu et al., 2022a
LG1	1_35666991_G_T	35666991	Liu et al., 2022a
LG1	1_35667586_A_T	35667586	Liu et al., 2022a
LG1	1_35667586_A_T	35667586	Liu et al., 2022a
LG1	1_35667586_A_T	35667586	Liu et al., 2022a
LG1	1_35667586_A_T	35667586	Liu et al., 2022a
LG1	1_35669449_T_A	35669449	Liu et al., 2022a
LG1	1_35669449_T_A	35669449	Liu et al., 2022a
LG1	1_35669449_T_A	35669449	Liu et al., 2022a
LG1	1_35669466_C_T	35669466	Liu et al., 2022a
LG1	1_35669466_C_T	35669466	Liu et al., 2022a
LG1	1_35669466_C_T	35669466	Liu et al., 2022a
LG1	1_35669466_C_T	35669466	Liu et al., 2022a
LG1	1_35669466_C_T	35669466	Liu et al., 2022a
LG1	1_35669516_C_T	35669516	Liu et al., 2022a
LG1	1_35669516_C_T	35669516	Liu et al., 2022a
LG1	1_35669516_C_T	35669516	Liu et al., 2022a
LG1	1_35670961_C_G	35670961	Liu et al., 2022a
LG1	1_35670961_C_G	35670961	Liu et al., 2022a
LG1	1_35670961_C_G	35670961	Liu et al., 2022a
LG1	1_35670961_C_G	35670961	Liu et al., 2022a
LG1	1_35670961_C_G	35670961	Liu et al., 2022a
LG1	1_35670961_C_G	35670961	Liu et al., 2022a
LG1	1_35671151_G_A	35671151	Liu et al., 2022a
LG1	1_35671151_G_A	35671151	Liu et al., 2022a
LG1	1_35671151_G_A	35671151	Liu et al., 2022a
LG1	1_35671151_G_A	35671151	Liu et al., 2022a
LG1	1_35671151_G_A	35671151	Liu et al., 2022a
LG1	1_35672745_T_A	35672745	Liu et al., 2022a
LG1	1_35672745_T_A	35672745	Liu et al., 2022a
LG1	1_35672745_T_A	35672745	Liu et al., 2022a
LG1	1_35672745_T_A	35672745	Liu et al., 2022a
LG1	1_35672745_T_A	35672745	Liu et al., 2022a
LG1	1_35672745_T_A	35672745	Liu et al., 2022a
LG1	1_35673059_A_G	35673059	Liu et al., 2022a
LG1	1_35673080_C_T	35673080	Liu et al., 2022a
LG1	1_35673080_C_T	35673080	Liu et al., 2022a
LG1	1_35673080_C_T	35673080	Liu et al., 2022a
LG1	1_35673080_C_T	35673080	Liu et al., 2022a
LG1	1_35673080_C_T	35673080	Liu et al., 2022a
LG1	1_35673080_C_T	35673080	Liu et al., 2022a
LG1	1_35673208_G_A	35673208	Liu et al., 2022a
LG1	1_35673208_G_A	35673208	Liu et al., 2022a
LG1	1_35673208_G_A	35673208	Liu et al., 2022a
LG1	1_35673208_G_A	35673208	Liu et al., 2022a
LG1	1_35673208_G_A	35673208	Liu et al., 2022a
LG1	1_35673220_G_A	35673220	Liu et al., 2022a
LG1	1_35673220_G_A	35673220	Liu et al., 2022a
LG1	1_35673220_G_A	35673220	Liu et al., 2022a
LG1	1_35673220_G_A	35673220	Liu et al., 2022a
LG1	1_35673593_T_G	35673593	Liu et al., 2022a
LG1	1_35673593_T_G	35673593	Liu et al., 2022a
LG1	1_35673593_T_G	35673593	Liu et al., 2022a
LG1	1_35673593_T_G	35673593	Liu et al., 2022a
LG1	1_35673593_T_G	35673593	Liu et al., 2022a
LG1	1_35673593_T_G	35673593	Liu et al., 2022a
LG1	1_35673741_T_C	35673741	Liu et al., 2022a
LG1	1_35673741_T_C	35673741	Liu et al., 2022a
LG1	1_35673741_T_C	35673741	Liu et al., 2022a
LG1	1_35673741_T_C	35673741	Liu et al., 2022a
LG1	1_35673741_T_C	35673741	Liu et al., 2022a
LG1	1_35674111_A_T	35674111	Liu et al., 2022a
LG1	1_35674111_A_T	35674111	Liu et al., 2022a
LG1	1_35675866_G_T	35675866	Liu et al., 2022a
LG1	1_35675957_A_G	35675957	Liu et al., 2022a
LG1	1_35678085_C_T	35678085	Liu et al., 2022a
LG1	1_35678085_C_T	35678085	Liu et al., 2022a
LG1	1_35679686_A_G	35679686	Liu et al., 2022a
LG1	1_35679686_A_G	35679686	Liu et al., 2022a
LG1	1_35683112_A_G	35683112	Liu et al., 2022a
LG1	1_35684200_T_C	35684200	Liu et al., 2022a
LG1	1_35684780_C_A	35684780	Liu et al., 2022a
LG1	1_35685275_A_T	35685275	Liu et al., 2022a
LG1	1_35690584_A_T	35690584	Liu et al., 2022a
LG1	1_35699813_A_T	35699813	Liu et al., 2022a
LG1	1_35701675_A_G	35701675	Liu et al., 2022a
LG1	1_35702258_G_A	35702258	Liu et al., 2022a
LG1	1_35702258_G_A	35702258	Liu et al., 2022a
LG1	1_35702569_G_A	35702569	Liu et al., 2022a
LG1	1_35702603_C_A	35702603	Liu et al., 2022a
LG1	1_35702603_C_A	35702603	Liu et al., 2022a
LG1	1_35702642_G_A	35702642	Liu et al., 2022a
LG1	1_35702696_C_T	35702696	Liu et al., 2022a
LG1	1_35703111_C_T	35703111	Liu et al., 2022a
LG1	1_35703213_C_A	35703213	Liu et al., 2022a
LG1	1_35704975_C_A	35704975	Liu et al., 2022a
LG1	1_35705978_A_G	35705978	Liu et al., 2022a
LG1	1_35705978_A_G	35705978	Liu et al., 2022a
LG1	1_35706366_A_G	35706366	Liu et al., 2022a
LG1	1_35706369_G_A	35706369	Liu et al., 2022a
LG1	1_35708497_G_A	35708497	Liu et al., 2022a
LG1	1_35731233_A_G	35731233	Liu et al., 2022a
LG1	1_35731233_A_G	35731233	Liu et al., 2022a
LG1	1_35733510_G_A	35733510	Liu et al., 2022a
LG1	1_35733510_G_A	35733510	Liu et al., 2022a
LG1	1_35733510_G_A	35733510	Liu et al., 2022a
LG1	1_35733510_G_A	35733510	Liu et al., 2022a
LG1	1_35737967_G_A	35737967	Liu et al., 2022a
LG1	1_35737967_G_A	35737967	Liu et al., 2022a
LG1	1_35737967_G_A	35737967	Liu et al., 2022a
LG1	1_35737967_G_A	35737967	Liu et al., 2022a
LG1	1_35751443_T_A	35751443	Liu et al., 2022a
LG1	1_35751443_T_A	35751443	Liu et al., 2022a
LG1	1_35751443_T_A	35751443	Liu et al., 2022a
LG1	1_35751443_T_A	35751443	Liu et al., 2022a
LG1	1_35760932_G_C	35760932	Liu et al., 2022a
LG1	1_35760932_G_C	35760932	Liu et al., 2022a
LG1	1_35760932_G_C	35760932	Liu et al., 2022a
LG1	1_35760932_G_C	35760932	Liu et al., 2022a
LG1	1_35760932_G_C	35760932	Liu et al., 2022a
LG1	1_35760932_G_C	35760932	Liu et al., 2022a
LG1	1_35762011_A_G	35762011	Liu et al., 2022a
LG1	1_35762011_A_G	35762011	Liu et al., 2022a
LG1	1_35762017_C_T	35762017	Liu et al., 2022a
LG1	1_35762017_C_T	35762017	Liu et al., 2022a
LG1	1_35762239_A_T	35762239	Liu et al., 2022a
LG1	1_35762239_A_T	35762239	Liu et al., 2022a
LG1	1_35762239_A_T	35762239	Liu et al., 2022a
LG1	1_35762239_A_T	35762239	Liu et al., 2022a
LG1	1_35762239_A_T	35762239	Liu et al., 2022a
LG1	1_35762239_A_T	35762239	Liu et al., 2022a
LG1	1_35764904_C_T	35764904	Liu et al., 2022a
LG1	1_35770321_C_A	35770321	Liu et al., 2022a
LG1	1_35770321_C_A	35770321	Liu et al., 2022a
LG1	1_35770321_C_A	35770321	Liu et al., 2022a
LG1	1_35770321_C_A	35770321	Liu et al., 2022a
LG1	1_35770321_C_A	35770321	Liu et al., 2022a
LG1	1_35770321_C_A	35770321	Liu et al., 2022a
LG1	1_35770764_T_A	35770764	Liu et al., 2022a
LG1	1_35770764_T_A	35770764	Liu et al., 2022a
LG1	1_35770764_T_A	35770764	Liu et al., 2022a
LG1	1_35770764_T_A	35770764	Liu et al., 2022a
LG1	1_35770764_T_A	35770764	Liu et al., 2022a
LG1	1_35770764_T_A	35770764	Liu et al., 2022a
LG1	1_35774795_A_C	35774795	Liu et al., 2022a
LG1	1_35774795_A_C	35774795	Liu et al., 2022a
LG1	1_35774795_A_C	35774795	Liu et al., 2022a
LG1	1_35774795_A_C	35774795	Liu et al., 2022a
LG1	1_35778185_C_T	35778185	Liu et al., 2022a
LG1	1_35778185_C_T	35778185	Liu et al., 2022a
LG1	1_35778185_C_T	35778185	Liu et al., 2022a
LG1	1_35778185_C_T	35778185	Liu et al., 2022a
LG1	1_35778185_C_T	35778185	Liu et al., 2022a
LG1	1_35778185_C_T	35778185	Liu et al., 2022a
LG1	1_35778682_A_T	35778682	Liu et al., 2022a
LG1	1_35778682_A_T	35778682	Liu et al., 2022a
LG1	1_35778682_A_T	35778682	Liu et al., 2022a
LG1	1_35778682_A_T	35778682	Liu et al., 2022a
LG1	1_35778682_A_T	35778682	Liu et al., 2022a
LG1	1_35778682_A_T	35778682	Liu et al., 2022a
LG1	1_35779694_C_A	35779694	Liu et al., 2022a
LG1	1_35779694_C_A	35779694	Liu et al., 2022a
LG1	1_35779694_C_A	35779694	Liu et al., 2022a
LG1	1_35779694_C_A	35779694	Liu et al., 2022a
LG1	1_35779694_C_A	35779694	Liu et al., 2022a
LG1	1_35779694_C_A	35779694	Liu et al., 2022a
LG1	1_35780325_C_A	35780325	Liu et al., 2022a
LG1	1_35780325_C_A	35780325	Liu et al., 2022a
LG1	1_35780325_C_A	35780325	Liu et al., 2022a
LG1	1_35780325_C_A	35780325	Liu et al., 2022a
LG1	1_35780325_C_A	35780325	Liu et al., 2022a
LG1	1_35780325_C_A	35780325	Liu et al., 2022a
LG1	1_35780757_T_G	35780757	Liu et al., 2022a
LG1	1_35780757_T_G	35780757	Liu et al., 2022a
LG1	1_35780757_T_G	35780757	Liu et al., 2022a
LG1	1_35780757_T_G	35780757	Liu et al., 2022a
LG1	1_35780757_T_G	35780757	Liu et al., 2022a
LG1	1_35780757_T_G	35780757	Liu et al., 2022a
LG1	1_35780757_T_G	35780757	Liu et al., 2022a
LG1	1_35780757_T_G	35780757	Liu et al., 2022a
LG1	1_35780757_T_G	35780757	Liu et al., 2022a
LG1	1_35780757_T_G	35780757	Liu et al., 2022a
LG1	1_35780757_T_G	35780757	Liu et al., 2022a
LG1	1_35780757_T_G	35780757	Liu et al., 2022a
LG1	NA	35782192	Liu et al., 2022b
LG1	1_35782302_T_C	35782302	Liu et al., 2022a
LG1	1_35782302_T_C	35782302	Liu et al., 2022a
LG1	1_35782302_T_C	35782302	Liu et al., 2022a
LG1	1_35804483_A_C	35804483	Liu et al., 2022a
LG1	1_35804483_A_C	35804483	Liu et al., 2022a
LG1	1_35858209_A_G	35858209	Liu et al., 2022a
LG1	1_35858209_A_G	35858209	Liu et al., 2022a
LG1	1_35901378_G_A	35901378	Liu et al., 2022a
LG1	1_35976172_G_A	35976172	Liu et al., 2022a
LG1	1_35976293_C_T	35976293	Liu et al., 2022a
LG1	1_35977677_T_A	35977677	Liu et al., 2022a
LG1	1_35985841_T_A	35985841	Liu et al., 2022a
LG1	NA	36688472	Liu et al., 2022b
LG1	NA	52015258	Liu et al., 2022b
LG1	NA	55690653	Liu et al., 2022b
LG1	NA	56541560	Liu et al., 2022b
LG1	NA	56862834	Liu et al., 2022b
LG1	NA	57388320	Liu et al., 2022b
LG1	NA	57388320	Liu et al., 2022b
LG1	NA	58680146	Liu et al., 2022b
LG1	NA	71147608	Liu et al., 2022b
LG1	NA	71543546	Liu et al., 2022b
LG1	NA	71543546	Liu et al., 2022b
LG2	NA	7258	Han et al., 2022
LG2	NA	7258	Han et al., 2022
LG2	NA	7258	Han et al., 2022
LG2	NA	7258	Han et al., 2022
LG2	S2_436374	436374	Manjunatha et al., 2023
LG2	2_620957_G_A	620957	Liu et al., 2022a
LG2	2_715797	715797	Chiteri et al., 2023
LG2	2_715797	715797	Chiteri et al., 2023
LG2	NA	1404159	Han et al., 2022
LG2	2_5156829_G_A	5156829	Liu et al., 2022a
LG2	2_5935179	5935179	Chiteri et al., 2023
LG2	2_5935179	5935179	Chiteri et al., 2023
LG2	2_5935179	5935179	Chiteri et al., 2023
LG2	2_5972317	5972317	Chiteri et al., 2023
LG2	2_5972317	5972317	Chiteri et al., 2023
LG2	2_6041359	6041359	Chiteri et al., 2023
LG2	2_6041359	6041359	Chiteri et al., 2023
LG2	NA	7831341	Han et al., 2022
LG2	2_8350032_T_C	8350032	Liu et al., 2022a
LG2	2_8350032_T_C	8350032	Liu et al., 2022a
LG2	2_8859405_C_T	8859405	Liu et al., 2022a
LG2	NA	12040684	Liu et al., 2022b
LG2	NA	12602704	Liu et al., 2022b
LG2	NA	12602704	Liu et al., 2022b
LG2	NA	12638174	Liu et al., 2022b
LG2	2_14694972	14694972	Chiteri et al., 2023
LG2	2_14694972	14694972	Chiteri et al., 2023
LG2	2_14694972	14694972	Chiteri et al., 2023
LG2	2_14750837_G_T	14750837	Liu et al., 2022a
LG2	2_14800500_G_C	14800500	Liu et al., 2022a
LG2	2_14800500_G_C	14800500	Liu et al., 2022a
LG2	NA	17430382	Han et al., 2022
LG2	2_19135153_C_T	19135153	Liu et al., 2022a
LG2	2_19818275_C_G	19818275	Liu et al., 2022a
LG2	S2_21963318	21963318	Manjunatha et al., 2023
LG2	S2_21963318	21963318	Manjunatha et al., 2023
LG2	S2_21963356	21963356	Manjunatha et al., 2023
LG2	S2_21963356	21963356	Manjunatha et al., 2023
LG2	NA	22031892	Liu et al., 2022b
LG2	2_22658605	22658605	Chiteri et al., 2023
LG2	NA	23895162	Han et al., 2022
LG2	NA	24230836	Han et al., 2022
LG2	NA	24282269	Han et al., 2022
LG2	NA	24282269	Han et al., 2022
LG2	NA	24282269	Han et al., 2022
LG2	S2_24801210	24801210	Manjunatha et al., 2023
LG2	S2_24810267	24810267	Manjunatha et al., 2023
LG2	2_25585665_A_C	25585665	Liu et al., 2022a
LG2	2_25585707_T_C	25585707	Liu et al., 2022a
LG2	2_25585707_T_C	25585707	Liu et al., 2022a
LG2	2_28900216_C_T	28900216	Liu et al., 2022a
LG2	2_28909278_G_A	28909278	Liu et al., 2022a
LG2	2_28910195_G_A	28910195	Liu et al., 2022a
LG2	2_28910195_G_A	28910195	Liu et al., 2022a
LG2	2_28919309_G_A	28919309	Liu et al., 2022a
LG2	2_28920357_C_T	28920357	Liu et al., 2022a
LG2	2_28920360_T_C	28920360	Liu et al., 2022a
LG2	2_28924567_G_A	28924567	Liu et al., 2022a
LG2	2_28924621_C_A	28924621	Liu et al., 2022a
LG2	2_28936186_T_C	28936186	Liu et al., 2022a
LG2	2_28936251_G_A	28936251	Liu et al., 2022a
LG2	2_28936268_G_A	28936268	Liu et al., 2022a
LG2	2_28936269_G_A	28936269	Liu et al., 2022a
LG2	2_28936273_A_G	28936273	Liu et al., 2022a
LG2	2_28954778_G_A	28954778	Liu et al., 2022a
LG2	2_28975666_G_A	28975666	Liu et al., 2022a
LG2	2_28975666_G_A	28975666	Liu et al., 2022a
LG2	2_29005481_G_A	29005481	Liu et al., 2022a
LG2	2_33187136_C_T	33187136	Liu et al., 2022a
LG2	2_33187679_C_G	33187679	Liu et al., 2022a
LG2	2_33824075_C_T	33824075	Liu et al., 2022a
LG2	2_33845474_T_C	33845474	Liu et al., 2022a
LG2	2_33855807_T_C	33855807	Liu et al., 2022a
LG2	2_33875295_A_G	33875295	Liu et al., 2022a
LG2	2_33875295_A_G	33875295	Liu et al., 2022a
LG2	2_34023586_A_G	34023586	Liu et al., 2022a
LG2	NA	34672689	Liu et al., 2022b
LG2	2_37667194_T_A	37667194	Liu et al., 2022a
LG2	2_39417724_C_A	39417724	Liu et al., 2022a
LG2	2_39417724_C_A	39417724	Liu et al., 2022a
LG2	NA	40796040	Liu et al., 2022b
LG2	NA	41276874	Liu et al., 2022b
LG2	NA	47643044	Liu et al., 2022b
LG2	NA	47643044	Liu et al., 2022b
LG2	NA	49301678	Liu et al., 2022b
LG2	NA	50649155	Liu et al., 2022b
LG3	3_725105	725105	Chiteri et al., 2023
LG3	3_725105	725105	Chiteri et al., 2023
LG3	3_725105	725105	Chiteri et al., 2023
LG3	3_725105	725105	Chiteri et al., 2023
LG3	3_725171	725171	Chiteri et al., 2023
LG3	3_986130_A_G	986130	Liu et al., 2022a	MQTLLG3-2
LG3	3_2164673_T_C	2164673	Liu et al., 2022a
LG3	3_2179271_G_A	2179271	Liu et al., 2022a
LG3	3_2179484_G_A	2179484	Liu et al., 2022a
LG3	3_2179931_C_A	2179931	Liu et al., 2022a
LG3	3_2813253	2813253	Chiteri et al., 2023
LG3	3_3913253	3913253	Chiteri et al., 2023
LG3	3_5678659_A_T	5678659	Liu et al., 2022a
LG3	3_5678661_A_T	5678661	Liu et al., 2022a
LG3	S3_7458210	7458210	Manjunatha et al., 2023
LG3	S3_7458210	7458210	Manjunatha et al., 2023
LG3	S3_7575781	7575781	Manjunatha et al., 2023
LG3	NA	7866319	Han et al., 2022
LG3	6201291|F|0-14:A>C-14:A>C	7879148	Noble et al., 2018
LG3	NA	8236844	Han et al., 2022
LG3	NA	9987335	Han et al., 2022
LG3	NA	12248102	Han et al., 2022
LG3	NA	12355802	Han et al., 2022
LG3	NA	12355802	Han et al., 2022
LG3	3_12356515_A_G	12356515	Liu et al., 2022a
LG3	NA	12657588	Han et al., 2022
LG3	3_13519141_G_A	13519141	Liu et al., 2022a
LG3	3_18928531_A_T	18928531	Liu et al., 2022a
LG3	3_19357123_G_A	19357123	Liu et al., 2022a
LG3	3_19462735_T_C	19462735	Liu et al., 2022a
LG3	3_19590249_T_C	19590249	Liu et al., 2022a
LG3	NA	19785451	Liu et al., 2022b
LG3	3_20291564_A_C	20291564	Liu et al., 2022a
LG3	3_20291644_A_G	20291644	Liu et al., 2022a
LG3	3_20291735_A_G	20291735	Liu et al., 2022a
LG3	NA	23616179	Liu et al., 2022b
LG3	3_24937035_C_T	24937035	Liu et al., 2022a
LG3	3_24937035_C_T	24937035	Liu et al., 2022a
LG3	3_24937035_C_T	24937035	Liu et al., 2022a
LG3	3_24950074_A_G	24950074	Liu et al., 2022a
LG3	3_24950074_A_G	24950074	Liu et al., 2022a
LG3	3_25108734_C_T	25108734	Liu et al., 2022a
LG3	3_25108734_C_T	25108734	Liu et al., 2022a
LG3	3_25108893_G_A	25108893	Liu et al., 2022a
LG3	3_25108893_G_A	25108893	Liu et al., 2022a
LG3	3_25109276_C_T	25109276	Liu et al., 2022a
LG3	3_25109276_C_T	25109276	Liu et al., 2022a
LG3	3_25109304_A_T	25109304	Liu et al., 2022a
LG3	3_25109398_G_A	25109398	Liu et al., 2022a
LG3	3_25109398_G_A	25109398	Liu et al., 2022a
LG3	3_25109564_A_T	25109564	Liu et al., 2022a
LG3	3_25109773_G_A	25109773	Liu et al., 2022a
LG3	3_25109851_C_T	25109851	Liu et al., 2022a
LG3	3_25110983_C_T	25110983	Liu et al., 2022a
LG3	3_25110983_C_T	25110983	Liu et al., 2022a
LG3	3_25111114_T_C	25111114	Liu et al., 2022a
LG3	3_25111114_T_C	25111114	Liu et al., 2022a
LG3	3_25111114_T_C	25111114	Liu et al., 2022a
LG3	3_25113267_T_A	25113267	Liu et al., 2022a
LG3	3_25113267_T_A	25113267	Liu et al., 2022a
LG3	3_25113267_T_A	25113267	Liu et al., 2022a
LG3	3_26050936_C_G	26050936	Liu et al., 2022a
LG3	NA	33780837	Liu et al., 2022b
LG3	NA	38805325	Liu et al., 2022b
LG3	NA	43917050	Liu et al., 2022b
LG3	NA	47513779	Liu et al., 2022b
LG4	NA	36918	Liu et al., 2022b
LG4	4_1084020_C_T	1084020	Liu et al., 2022a
LG4	4_1084020_C_T	1084020	Liu et al., 2022a
LG4	4_1084020_C_T	1084020	Liu et al., 2022a
LG4	4_1084020_C_T	1084020	Liu et al., 2022a
LG4	NA	1626933	Han et al., 2022
LG4	4_3828052_T_G	3828052	Liu et al., 2022a
LG4	4_3828052_T_G	3828052	Liu et al., 2022a
LG4	4_3845195_T_C	3845195	Liu et al., 2022a
LG4	4_3978843_A_G	3978843	Liu et al., 2022a
LG4	4_4012880_A_G	4012880	Liu et al., 2022a
LG4	4_4013512_G_C	4013512	Liu et al., 2022a
LG4	4_4030716_T_A	4030716	Liu et al., 2022a
LG4	4_4589912_A_G	4589912	Liu et al., 2022a
LG4	4_4589912_A_G	4589912	Liu et al., 2022a
LG4	4_4598244_C_T	4598244	Liu et al., 2022a
LG4	4_4598244_C_T	4598244	Liu et al., 2022a
LG4	4_4609463_A_T	4609463	Liu et al., 2022a
LG4	4_4610442_T_A	4610442	Liu et al., 2022a
LG4	4_4610442_T_A	4610442	Liu et al., 2022a
LG4	4_4677511_T_C	4677511	Liu et al., 2022a
LG4	4_4677511_T_C	4677511	Liu et al., 2022a
LG4	4_4677511_T_C	4677511	Liu et al., 2022a
LG4	4_4677511_T_C	4677511	Liu et al., 2022a
LG4	4_4730948_C_T	4730948	Liu et al., 2022a
LG4	4_4743374_A_C	4743374	Liu et al., 2022a
LG4	4_4743374_A_C	4743374	Liu et al., 2022a
LG4	4_6351552_G_A	6351552	Liu et al., 2022a
LG4	4_6351708_A_G	6351708	Liu et al., 2022a
LG4	4_6351708_A_G	6351708	Liu et al., 2022a
LG4	NA	7146856	Han et al., 2022
LG4	NA	7171502	Han et al., 2022
LG4	NA	7755858	Liu et al., 2022b
LG4	NA	10069367	Liu et al., 2022b
LG4	NA	10069367	Liu et al., 2022b
LG4	4_12034433_A_C	12034433	Liu et al., 2022a
LG4	4_12034465_C_T	12034465	Liu et al., 2022a
LG4	4_12034468_C_T	12034468	Liu et al., 2022a
LG4	4_12077427_G_T	12077427	Liu et al., 2022a
LG4	4_12109330_A_G	12109330	Liu et al., 2022a
LG4	4_12116720_T_G	12116720	Liu et al., 2022a
LG4	4_12197599_C_T	12197599	Liu et al., 2022a
LG4	4_12205874_A_G	12205874	Liu et al., 2022a
LG4	4_12205874_A_G	12205874	Liu et al., 2022a
LG4	4_12336575_C_T	12336575	Liu et al., 2022a
LG4	4_12336575_C_T	12336575	Liu et al., 2022a
LG4	4_12352327_C_T	12352327	Liu et al., 2022a
LG4	4_12352327_C_T	12352327	Liu et al., 2022a
LG4	4_12444993_G_A	12444993	Liu et al., 2022a
LG4	4_12444993_G_A	12444993	Liu et al., 2022a
LG4	4_12445650_A_G	12445650	Liu et al., 2022a
LG4	4_12445650_A_G	12445650	Liu et al., 2022a
LG4	4_12445797_A_G	12445797	Liu et al., 2022a
LG4	4_12445797_A_G	12445797	Liu et al., 2022a
LG4	4_12445914_C_T	12445914	Liu et al., 2022a
LG4	4_12445914_C_T	12445914	Liu et al., 2022a
LG4	4_12446201_C_T	12446201	Liu et al., 2022a
LG4	4_12446262_A_G	12446262	Liu et al., 2022a
LG4	4_12446782_T_C	12446782	Liu et al., 2022a
LG4	4_12446782_T_C	12446782	Liu et al., 2022a
LG4	4_12446860_T_C	12446860	Liu et al., 2022a
LG4	4_12446860_T_C	12446860	Liu et al., 2022a
LG4	4_12446878_C_A	12446878	Liu et al., 2022a
LG4	4_12446878_C_A	12446878	Liu et al., 2022a
LG4	4_12446945_G_T	12446945	Liu et al., 2022a
LG4	4_12446945_G_T	12446945	Liu et al., 2022a
LG4	4_12447156_A_G	12447156	Liu et al., 2022a
LG4	4_12447156_A_G	12447156	Liu et al., 2022a
LG4	4_12448324_C_T	12448324	Liu et al., 2022a
LG4	4_12448694_T_C	12448694	Liu et al., 2022a
LG4	4_12448745_T_A	12448745	Liu et al., 2022a
LG4	4_12449269_A_G	12449269	Liu et al., 2022a
LG4	4_12449419_G_A	12449419	Liu et al., 2022a
LG4	4_12449719_T_C	12449719	Liu et al., 2022a
LG4	4_12449764_C_T	12449764	Liu et al., 2022a
LG4	4_12449789_T_C	12449789	Liu et al., 2022a
LG4	4_12449797_C_T	12449797	Liu et al., 2022a
LG4	4_12449840_G_A	12449840	Liu et al., 2022a
LG4	4_12449886_C_T	12449886	Liu et al., 2022a
LG4	4_12449927_C_T	12449927	Liu et al., 2022a
LG4	4_12450100_G_A	12450100	Liu et al., 2022a
LG4	4_12451141_T_C	12451141	Liu et al., 2022a
LG4	4_12451182_T_C	12451182	Liu et al., 2022a
LG4	4_12451266_A_G	12451266	Liu et al., 2022a
LG4	4_12451324_A_G	12451324	Liu et al., 2022a
LG4	4_12451331_A_G	12451331	Liu et al., 2022a
LG4	4_12451388_A_T	12451388	Liu et al., 2022a
LG4	4_12454850_C_T	12454850	Liu et al., 2022a
LG4	4_12454854_C_A	12454854	Liu et al., 2022a
LG4	4_12454941_A_G	12454941	Liu et al., 2022a
LG4	4_12454950_T_A	12454950	Liu et al., 2022a
LG4	4_12454952_G_C	12454952	Liu et al., 2022a
LG4	4_12454997_C_T	12454997	Liu et al., 2022a
LG4	4_12455055_C_A	12455055	Liu et al., 2022a
LG4	4_12455056_C_T	12455056	Liu et al., 2022a
LG4	4_12455293_G_T	12455293	Liu et al., 2022a
LG4	4_12455387_G_A	12455387	Liu et al., 2022a
LG4	4_12455390_A_G	12455390	Liu et al., 2022a
LG4	4_12455515_A_C	12455515	Liu et al., 2022a
LG4	4_12456530_C_T	12456530	Liu et al., 2022a
LG4	4_12456897_G_T	12456897	Liu et al., 2022a
LG4	4_12456965_G_T	12456965	Liu et al., 2022a
LG4	4_12456967_A_C	12456967	Liu et al., 2022a
LG4	4_12456977_G_A	12456977	Liu et al., 2022a
LG4	4_12456979_C_T	12456979	Liu et al., 2022a
LG4	4_12457035_C_T	12457035	Liu et al., 2022a
LG4	4_12457439_A_T	12457439	Liu et al., 2022a
LG4	4_12459507_C_T	12459507	Liu et al., 2022a
LG4	4_12459530_T_A	12459530	Liu et al., 2022a
LG4	4_12459550_G_A	12459550	Liu et al., 2022a
LG4	4_12460002_T_A	12460002	Liu et al., 2022a
LG4	4_12460004_T_A	12460004	Liu et al., 2022a
LG4	4_12460185_A_T	12460185	Liu et al., 2022a
LG4	4_12460302_T_C	12460302	Liu et al., 2022a
LG4	4_12460324_T_G	12460324	Liu et al., 2022a
LG4	4_12460380_C_T	12460380	Liu et al., 2022a
LG4	4_12460475_G_T	12460475	Liu et al., 2022a
LG4	4_12460476_A_G	12460476	Liu et al., 2022a
LG4	4_12460670_G_A	12460670	Liu et al., 2022a
LG4	4_12460725_G_T	12460725	Liu et al., 2022a
LG4	4_12460935_T_C	12460935	Liu et al., 2022a
LG4	4_12461032_T_A	12461032	Liu et al., 2022a
LG4	4_12461051_C_T	12461051	Liu et al., 2022a
LG4	4_12461133_A_T	12461133	Liu et al., 2022a
LG4	4_12461204_G_A	12461204	Liu et al., 2022a
LG4	4_12461276_G_A	12461276	Liu et al., 2022a
LG4	4_12461600_C_T	12461600	Liu et al., 2022a
LG4	4_12461601_G_C	12461601	Liu et al., 2022a
LG4	4_12461614_A_G	12461614	Liu et al., 2022a
LG4	4_12462556_C_T	12462556	Liu et al., 2022a
LG4	4_12462607_G_A	12462607	Liu et al., 2022a
LG4	4_12463086_C_T	12463086	Liu et al., 2022a
LG4	4_12463937_A_G	12463937	Liu et al., 2022a
LG4	4_12463996_A_T	12463996	Liu et al., 2022a
LG4	4_12464760_A_G	12464760	Liu et al., 2022a
LG4	4_12465394_C_T	12465394	Liu et al., 2022a
LG4	4_12465510_G_A	12465510	Liu et al., 2022a
LG4	4_12465591_T_C	12465591	Liu et al., 2022a
LG4	4_12465698_G_A	12465698	Liu et al., 2022a
LG4	4_12465725_C_T	12465725	Liu et al., 2022a
LG4	4_12465867_T_C	12465867	Liu et al., 2022a
LG4	4_12466968_A_G	12466968	Liu et al., 2022a
LG4	4_12466968_A_G	12466968	Liu et al., 2022a
LG4	4_12469071_C_T	12469071	Liu et al., 2022a
LG4	4_12469105_G_A	12469105	Liu et al., 2022a
LG4	4_12469395_G_A	12469395	Liu et al., 2022a
LG4	4_12469395_G_A	12469395	Liu et al., 2022a
LG4	4_12469828_A_G	12469828	Liu et al., 2022a
LG4	4_12470208_A_G	12470208	Liu et al., 2022a
LG4	4_12470232_G_A	12470232	Liu et al., 2022a
LG4	4_12470266_T_C	12470266	Liu et al., 2022a
LG4	4_12470277_T_C	12470277	Liu et al., 2022a
LG4	4_12470349_G_A	12470349	Liu et al., 2022a
LG4	4_12470440_C_T	12470440	Liu et al., 2022a
LG4	4_12470474_C_A	12470474	Liu et al., 2022a
LG4	4_12470863_T_C	12470863	Liu et al., 2022a
LG4	4_12472271_C_G	12472271	Liu et al., 2022a
LG4	4_12472767_T_A	12472767	Liu et al., 2022a
LG4	4_12473293_G_A	12473293	Liu et al., 2022a
LG4	4_12473460_A_G	12473460	Liu et al., 2022a
LG4	4_12473461_C_T	12473461	Liu et al., 2022a
LG4	4_12475607_C_A	12475607	Liu et al., 2022a
LG4	4_12476058_G_A	12476058	Liu et al., 2022a
LG4	4_12476251_C_T	12476251	Liu et al., 2022a
LG4	4_12476389_A_G	12476389	Liu et al., 2022a
LG4	4_12477092_A_G	12477092	Liu et al., 2022a
LG4	4_12477157_T_C	12477157	Liu et al., 2022a
LG4	4_12477243_G_A	12477243	Liu et al., 2022a
LG4	4_12477598_T_C	12477598	Liu et al., 2022a
LG4	4_12477649_A_G	12477649	Liu et al., 2022a
LG4	4_12477753_C_T	12477753	Liu et al., 2022a
LG4	4_12477829_G_A	12477829	Liu et al., 2022a
LG4	4_12478338_C_T	12478338	Liu et al., 2022a
LG4	4_12478440_A_G	12478440	Liu et al., 2022a
LG4	4_12478795_T_G	12478795	Liu et al., 2022a
LG4	4_12478795_T_G	12478795	Liu et al., 2022a
LG4	4_12478877_C_T	12478877	Liu et al., 2022a
LG4	4_12478877_C_T	12478877	Liu et al., 2022a
LG4	4_12479052_A_G	12479052	Liu et al., 2022a
LG4	4_12479053_G_A	12479053	Liu et al., 2022a
LG4	4_12479082_A_G	12479082	Liu et al., 2022a
LG4	4_12479088_T_C	12479088	Liu et al., 2022a
LG4	4_12479188_C_T	12479188	Liu et al., 2022a
LG4	4_12479188_C_T	12479188	Liu et al., 2022a
LG4	4_12479618_T_C	12479618	Liu et al., 2022a
LG4	4_12479663_G_A	12479663	Liu et al., 2022a
LG4	4_12479691_C_T	12479691	Liu et al., 2022a
LG4	4_12479699_T_C	12479699	Liu et al., 2022a
LG4	4_12480641_C_A	12480641	Liu et al., 2022a
LG4	4_12480641_C_A	12480641	Liu et al., 2022a
LG4	4_12480641_C_A	12480641	Liu et al., 2022a
LG4	4_12480641_C_A	12480641	Liu et al., 2022a
LG4	4_12482658_C_T	12482658	Liu et al., 2022a
LG4	4_12483800_G_A	12483800	Liu et al., 2022a
LG4	4_12484091_G_A	12484091	Liu et al., 2022a
LG4	4_12484192_C_T	12484192	Liu et al., 2022a
LG4	4_12484237_G_T	12484237	Liu et al., 2022a
LG4	4_12485134_C_T	12485134	Liu et al., 2022a
LG4	4_12485267_G_A	12485267	Liu et al., 2022a
LG4	4_12485396_T_A	12485396	Liu et al., 2022a
LG4	4_12487255_T_C	12487255	Liu et al., 2022a
LG4	4_12487385_C_T	12487385	Liu et al., 2022a
LG4	4_12487806_G_A	12487806	Liu et al., 2022a
LG4	4_12487821_A_G	12487821	Liu et al., 2022a
LG4	4_12487898_A_G	12487898	Liu et al., 2022a
LG4	4_12488742_A_G	12488742	Liu et al., 2022a
LG4	4_12489061_C_T	12489061	Liu et al., 2022a
LG4	4_12491094_G_C	12491094	Liu et al., 2022a
LG4	4_12495203_T_C	12495203	Liu et al., 2022a
LG4	4_12495348_C_T	12495348	Liu et al., 2022a
LG4	4_12495418_C_T	12495418	Liu et al., 2022a
LG4	4_12495673_A_G	12495673	Liu et al., 2022a
LG4	4_12495952_A_G	12495952	Liu et al., 2022a
LG4	4_12496318_G_A	12496318	Liu et al., 2022a
LG4	4_12496568_A_G	12496568	Liu et al., 2022a
LG4	4_12497905_T_C	12497905	Liu et al., 2022a
LG4	4_12498292_G_A	12498292	Liu et al., 2022a
LG4	4_12498688_C_T	12498688	Liu et al., 2022a
LG4	4_12499074_C_T	12499074	Liu et al., 2022a
LG4	4_12499344_G_A	12499344	Liu et al., 2022a
LG4	4_12504670_G_A	12504670	Liu et al., 2022a
LG4	4_12505011_C_T	12505011	Liu et al., 2022a
LG4	4_12505616_G_A	12505616	Liu et al., 2022a
LG4	NA	12506961	Liu et al., 2022b
LG4	4_12507344_A_C	12507344	Liu et al., 2022a
LG4	4_12517882_T_C	12517882	Liu et al., 2022a
LG4	4_12518379_T_G	12518379	Liu et al., 2022a
LG4	4_12523790_G_A	12523790	Liu et al., 2022a
LG4	4_12523954_A_C	12523954	Liu et al., 2022a
LG4	4_12526442_C_T	12526442	Liu et al., 2022a
LG4	4_12526659_C_A	12526659	Liu et al., 2022a
LG4	4_12526671_T_C	12526671	Liu et al., 2022a
LG4	4_12526879_G_A	12526879	Liu et al., 2022a
LG4	4_12526904_T_C	12526904	Liu et al., 2022a
LG4	4_12527437_C_T	12527437	Liu et al., 2022a
LG4	4_12527437_C_T	12527437	Liu et al., 2022a
LG4	4_12527437_C_T	12527437	Liu et al., 2022a
LG4	4_12527437_C_T	12527437	Liu et al., 2022a
LG4	4_12530209_T_C	12530209	Liu et al., 2022a
LG4	4_12530209_T_C	12530209	Liu et al., 2022a
LG4	4_12530209_T_C	12530209	Liu et al., 2022a
LG4	4_12530209_T_C	12530209	Liu et al., 2022a
LG4	4_12530334_C_G	12530334	Liu et al., 2022a
LG4	4_12530334_C_G	12530334	Liu et al., 2022a
LG4	4_12530334_C_G	12530334	Liu et al., 2022a
LG4	4_12530334_C_G	12530334	Liu et al., 2022a
LG4	4_12534670_T_C	12534670	Liu et al., 2022a
LG4	4_12534717_T_C	12534717	Liu et al., 2022a
LG4	4_12534827_C_A	12534827	Liu et al., 2022a
LG4	4_12534832_C_T	12534832	Liu et al., 2022a
LG4	4_12534929_G_A	12534929	Liu et al., 2022a
LG4	4_12534949_A_G	12534949	Liu et al., 2022a
LG4	4_12534972_C_T	12534972	Liu et al., 2022a
LG4	4_12535052_G_A	12535052	Liu et al., 2022a
LG4	4_12535225_A_G	12535225	Liu et al., 2022a
LG4	4_12536168_C_T	12536168	Liu et al., 2022a
LG4	4_12536279_C_T	12536279	Liu et al., 2022a
LG4	4_12536338_C_T	12536338	Liu et al., 2022a
LG4	4_12536396_C_T	12536396	Liu et al., 2022a
LG4	4_12536421_C_G	12536421	Liu et al., 2022a
LG4	4_12536447_C_G	12536447	Liu et al., 2022a
LG4	4_12536454_G_A	12536454	Liu et al., 2022a
LG4	4_12536465_G_C	12536465	Liu et al., 2022a
LG4	4_12536529_T_C	12536529	Liu et al., 2022a
LG4	4_12536532_G_A	12536532	Liu et al., 2022a
LG4	4_12536643_C_T	12536643	Liu et al., 2022a
LG4	4_12536645_G_A	12536645	Liu et al., 2022a
LG4	4_12537765_G_A	12537765	Liu et al., 2022a
LG4	4_12539471_T_C	12539471	Liu et al., 2022a
LG4	4_12540811_T_A	12540811	Liu et al., 2022a
LG4	4_12540862_G_A	12540862	Liu et al., 2022a
LG4	4_12541110_A_G	12541110	Liu et al., 2022a
LG4	4_12541737_C_A	12541737	Liu et al., 2022a
LG4	4_12542260_C_T	12542260	Liu et al., 2022a
LG4	4_12542475_G_A	12542475	Liu et al., 2022a
LG4	4_12543422_G_A	12543422	Liu et al., 2022a
LG4	4_12543425_G_T	12543425	Liu et al., 2022a
LG4	4_12543471_G_A	12543471	Liu et al., 2022a
LG4	4_12543487_G_A	12543487	Liu et al., 2022a
LG4	4_12543957_A_G	12543957	Liu et al., 2022a
LG4	4_12544011_G_A	12544011	Liu et al., 2022a
LG4	4_12544041_A_G	12544041	Liu et al., 2022a
LG4	4_12544347_A_G	12544347	Liu et al., 2022a
LG4	4_12544440_C_G	12544440	Liu et al., 2022a
LG4	4_12544621_C_T	12544621	Liu et al., 2022a
LG4	4_12544749_G_A	12544749	Liu et al., 2022a
LG4	4_12544990_G_A	12544990	Liu et al., 2022a
LG4	4_12545470_T_G	12545470	Liu et al., 2022a
LG4	4_12545484_G_A	12545484	Liu et al., 2022a
LG4	4_12545510_G_A	12545510	Liu et al., 2022a
LG4	4_12545567_G_T	12545567	Liu et al., 2022a
LG4	4_12545673_T_C	12545673	Liu et al., 2022a
LG4	4_12545697_C_T	12545697	Liu et al., 2022a
LG4	4_12545705_C_G	12545705	Liu et al., 2022a
LG4	4_12545865_C_G	12545865	Liu et al., 2022a
LG4	4_12545941_C_A	12545941	Liu et al., 2022a
LG4	4_12545959_A_G	12545959	Liu et al., 2022a
LG4	4_12546460_G_A	12546460	Liu et al., 2022a
LG4	4_12547001_A_G	12547001	Liu et al., 2022a
LG4	4_12547105_T_C	12547105	Liu et al., 2022a
LG4	4_12547207_G_A	12547207	Liu et al., 2022a
LG4	4_12547207_G_A	12547207	Liu et al., 2022a
LG4	4_12547403_A_G	12547403	Liu et al., 2022a
LG4	4_12547427_A_G	12547427	Liu et al., 2022a
LG4	4_12547559_C_A	12547559	Liu et al., 2022a
LG4	4_12547577_G_A	12547577	Liu et al., 2022a
LG4	4_12548962_C_T	12548962	Liu et al., 2022a
LG4	4_12550584_G_A	12550584	Liu et al., 2022a
LG4	4_12551447_A_C	12551447	Liu et al., 2022a
LG4	4_12551549_C_T	12551549	Liu et al., 2022a
LG4	4_12551549_C_T	12551549	Liu et al., 2022a
LG4	4_12553166_A_G	12553166	Liu et al., 2022a
LG4	4_12553166_A_G	12553166	Liu et al., 2022a
LG4	4_12553237_C_T	12553237	Liu et al., 2022a
LG4	4_12553237_C_T	12553237	Liu et al., 2022a
LG4	4_12553773_T_C	12553773	Liu et al., 2022a
LG4	4_12553807_C_A	12553807	Liu et al., 2022a
LG4	4_12553840_G_A	12553840	Liu et al., 2022a
LG4	4_12555094_G_A	12555094	Liu et al., 2022a
LG4	4_12555098_C_T	12555098	Liu et al., 2022a
LG4	4_12555100_G_T	12555100	Liu et al., 2022a
LG4	4_12555141_G_A	12555141	Liu et al., 2022a
LG4	4_12555185_C_G	12555185	Liu et al., 2022a
LG4	4_12555204_C_T	12555204	Liu et al., 2022a
LG4	4_12555261_T_A	12555261	Liu et al., 2022a
LG4	4_12555468_T_A	12555468	Liu et al., 2022a
LG4	4_12555468_T_A	12555468	Liu et al., 2022a
LG4	4_12555600_G_C	12555600	Liu et al., 2022a
LG4	4_12555622_A_C	12555622	Liu et al., 2022a
LG4	4_12555888_A_T	12555888	Liu et al., 2022a
LG4	4_12555942_G_C	12555942	Liu et al., 2022a
LG4	4_12563345_A_G	12563345	Liu et al., 2022a
LG4	4_12563345_A_G	12563345	Liu et al., 2022a
LG4	4_12564522_C_T	12564522	Liu et al., 2022a
LG4	4_12564522_C_T	12564522	Liu et al., 2022a
LG4	4_12564522_C_T	12564522	Liu et al., 2022a
LG4	4_12564522_C_T	12564522	Liu et al., 2022a
LG4	4_12564666_C_T	12564666	Liu et al., 2022a
LG4	4_12564666_C_T	12564666	Liu et al., 2022a
LG4	4_12564666_C_T	12564666	Liu et al., 2022a
LG4	4_12564666_C_T	12564666	Liu et al., 2022a
LG4	4_12564679_C_T	12564679	Liu et al., 2022a
LG4	4_12564679_C_T	12564679	Liu et al., 2022a
LG4	4_12564679_C_T	12564679	Liu et al., 2022a
LG4	4_12564679_C_T	12564679	Liu et al., 2022a
LG4	4_12566041_C_T	12566041	Liu et al., 2022a
LG4	4_12566110_A_G	12566110	Liu et al., 2022a
LG4	4_12566251_A_T	12566251	Liu et al., 2022a
LG4	4_12566490_T_C	12566490	Liu et al., 2022a
LG4	4_12566586_C_T	12566586	Liu et al., 2022a
LG4	4_12566586_C_T	12566586	Liu et al., 2022a
LG4	4_12566744_G_C	12566744	Liu et al., 2022a
LG4	4_12566744_G_C	12566744	Liu et al., 2022a
LG4	4_12566949_T_C	12566949	Liu et al., 2022a
LG4	4_12567438_G_A	12567438	Liu et al., 2022a
LG4	4_12567566_C_G	12567566	Liu et al., 2022a
LG4	4_12567567_C_A	12567567	Liu et al., 2022a
LG4	4_12567903_G_A	12567903	Liu et al., 2022a
LG4	4_12567944_A_G	12567944	Liu et al., 2022a
LG4	4_12568601_T_C	12568601	Liu et al., 2022a
LG4	4_12568639_G_C	12568639	Liu et al., 2022a
LG4	4_12568871_G_T	12568871	Liu et al., 2022a
LG4	4_12568946_A_G	12568946	Liu et al., 2022a
LG4	4_12569957_A_C	12569957	Liu et al., 2022a
LG4	4_12570012_G_A	12570012	Liu et al., 2022a
LG4	4_12570110_T_C	12570110	Liu et al., 2022a
LG4	4_12570304_T_C	12570304	Liu et al., 2022a
LG4	4_12570599_T_C	12570599	Liu et al., 2022a
LG4	4_12571012_G_A	12571012	Liu et al., 2022a
LG4	4_12571314_G_A	12571314	Liu et al., 2022a
LG4	4_12572372_T_C	12572372	Liu et al., 2022a
LG4	4_12572372_T_C	12572372	Liu et al., 2022a
LG4	4_12572381_A_G	12572381	Liu et al., 2022a
LG4	4_12572381_A_G	12572381	Liu et al., 2022a
LG4	4_12572432_C_T	12572432	Liu et al., 2022a
LG4	4_12572432_C_T	12572432	Liu et al., 2022a
LG4	4_12572987_A_G	12572987	Liu et al., 2022a
LG4	4_12573662_G_A	12573662	Liu et al., 2022a
LG4	4_12573788_G_C	12573788	Liu et al., 2022a
LG4	4_12574512_C_T	12574512	Liu et al., 2022a
LG4	4_12574519_G_A	12574519	Liu et al., 2022a
LG4	4_12574784_G_A	12574784	Liu et al., 2022a
LG4	4_12575597_C_T	12575597	Liu et al., 2022a
LG4	4_12576187_G_A	12576187	Liu et al., 2022a
LG4	4_12576445_C_T	12576445	Liu et al., 2022a
LG4	4_12579239_A_G	12579239	Liu et al., 2022a
LG4	4_12579957_T_A	12579957	Liu et al., 2022a
LG4	4_12580090_A_G	12580090	Liu et al., 2022a
LG4	4_12580419_C_T	12580419	Liu et al., 2022a
LG4	4_12580447_A_G	12580447	Liu et al., 2022a
LG4	4_12580517_A_T	12580517	Liu et al., 2022a
LG4	4_12581311_A_G	12581311	Liu et al., 2022a
LG4	4_12581732_T_G	12581732	Liu et al., 2022a
LG4	4_12582844_C_T	12582844	Liu et al., 2022a
LG4	4_12583104_A_G	12583104	Liu et al., 2022a
LG4	4_12583174_T_C	12583174	Liu et al., 2022a
LG4	4_12583187_T_C	12583187	Liu et al., 2022a
LG4	4_12583355_T_C	12583355	Liu et al., 2022a
LG4	4_12583415_T_C	12583415	Liu et al., 2022a
LG4	4_12583565_G_T	12583565	Liu et al., 2022a
LG4	4_12583965_C_T	12583965	Liu et al., 2022a
LG4	4_12584815_T_C	12584815	Liu et al., 2022a
LG4	4_12585322_C_T	12585322	Liu et al., 2022a
LG4	4_12585583_G_A	12585583	Liu et al., 2022a
LG4	4_12585943_T_C	12585943	Liu et al., 2022a
LG4	4_12585943_T_C	12585943	Liu et al., 2022a
LG4	4_12586090_T_C	12586090	Liu et al., 2022a
LG4	4_12586090_T_C	12586090	Liu et al., 2022a
LG4	4_12586149_T_C	12586149	Liu et al., 2022a
LG4	4_12586149_T_C	12586149	Liu et al., 2022a
LG4	4_12586226_G_A	12586226	Liu et al., 2022a
LG4	4_12586226_G_A	12586226	Liu et al., 2022a
LG4	4_12586274_T_C	12586274	Liu et al., 2022a
LG4	4_12586274_T_C	12586274	Liu et al., 2022a
LG4	4_12586383_C_T	12586383	Liu et al., 2022a
LG4	4_12586715_G_A	12586715	Liu et al., 2022a
LG4	4_12587151_A_G	12587151	Liu et al., 2022a
LG4	4_12587170_G_A	12587170	Liu et al., 2022a
LG4	4_12587339_A_G	12587339	Liu et al., 2022a
LG4	4_12587414_A_C	12587414	Liu et al., 2022a
LG4	4_12587493_G_T	12587493	Liu et al., 2022a
LG4	4_12587535_A_G	12587535	Liu et al., 2022a
LG4	4_12587547_G_A	12587547	Liu et al., 2022a
LG4	4_12591852_A_G	12591852	Liu et al., 2022a
LG4	4_12593191_G_A	12593191	Liu et al., 2022a
LG4	4_12593222_C_T	12593222	Liu et al., 2022a
LG4	4_12593382_G_T	12593382	Liu et al., 2022a
LG4	4_12593778_A_G	12593778	Liu et al., 2022a
LG4	4_12596079_G_A	12596079	Liu et al., 2022a
LG4	4_12596145_C_G	12596145	Liu et al., 2022a
LG4	4_12596147_C_T	12596147	Liu et al., 2022a
LG4	4_12597636_A_G	12597636	Liu et al., 2022a
LG4	4_12597661_C_A	12597661	Liu et al., 2022a
LG4	4_12598273_A_G	12598273	Liu et al., 2022a
LG4	4_12598460_T_C	12598460	Liu et al., 2022a
LG4	4_12598487_G_A	12598487	Liu et al., 2022a
LG4	4_12599636_A_G	12599636	Liu et al., 2022a
LG4	4_12602615_A_G	12602615	Liu et al., 2022a
LG4	4_12602616_G_A	12602616	Liu et al., 2022a
LG4	4_12602638_G_T	12602638	Liu et al., 2022a
LG4	4_12602672_A_G	12602672	Liu et al., 2022a
LG4	4_12602675_A_G	12602675	Liu et al., 2022a
LG4	4_12602688_C_T	12602688	Liu et al., 2022a
LG4	4_12602713_A_G	12602713	Liu et al., 2022a
LG4	4_12602724_A_G	12602724	Liu et al., 2022a
LG4	4_12602752_G_A	12602752	Liu et al., 2022a
LG4	4_12602784_C_A	12602784	Liu et al., 2022a
LG4	4_12602786_A_G	12602786	Liu et al., 2022a
LG4	4_12602804_T_G	12602804	Liu et al., 2022a
LG4	4_12602902_C_T	12602902	Liu et al., 2022a
LG4	4_12602955_T_G	12602955	Liu et al., 2022a
LG4	4_12603017_A_G	12603017	Liu et al., 2022a
LG4	4_12603042_C_G	12603042	Liu et al., 2022a
LG4	4_12607033_T_A	12607033	Liu et al., 2022a
LG4	4_12607033_T_A	12607033	Liu et al., 2022a
LG4	4_12607067_C_T	12607067	Liu et al., 2022a
LG4	4_12607075_C_T	12607075	Liu et al., 2022a
LG4	4_12607077_T_C	12607077	Liu et al., 2022a
LG4	4_12607096_A_T	12607096	Liu et al., 2022a
LG4	4_12607097_T_C	12607097	Liu et al., 2022a
LG4	4_12607160_A_G	12607160	Liu et al., 2022a
LG4	4_12607329_C_T	12607329	Liu et al., 2022a
LG4	4_12607329_C_T	12607329	Liu et al., 2022a
LG4	4_12607567_G_A	12607567	Liu et al., 2022a
LG4	4_12607567_G_A	12607567	Liu et al., 2022a
LG4	4_12607628_T_C	12607628	Liu et al., 2022a
LG4	4_12607628_T_C	12607628	Liu et al., 2022a
LG4	4_12609110_T_A	12609110	Liu et al., 2022a
LG4	4_12609279_C_T	12609279	Liu et al., 2022a
LG4	4_12609329_C_T	12609329	Liu et al., 2022a
LG4	4_12609369_C_T	12609369	Liu et al., 2022a
LG4	4_12609388_A_G	12609388	Liu et al., 2022a
LG4	4_12609429_A_G	12609429	Liu et al., 2022a
LG4	4_12609443_C_T	12609443	Liu et al., 2022a
LG4	4_12609445_G_T	12609445	Liu et al., 2022a
LG4	4_12609452_A_G	12609452	Liu et al., 2022a
LG4	4_12609497_A_G	12609497	Liu et al., 2022a
LG4	4_12609553_G_A	12609553	Liu et al., 2022a
LG4	4_12609627_A_G	12609627	Liu et al., 2022a
LG4	4_12609630_G_A	12609630	Liu et al., 2022a
LG4	4_12609681_A_T	12609681	Liu et al., 2022a
LG4	4_12609884_T_A	12609884	Liu et al., 2022a
LG4	4_12609938_C_A	12609938	Liu et al., 2022a
LG4	4_12610072_T_A	12610072	Liu et al., 2022a
LG4	4_12610457_A_G	12610457	Liu et al., 2022a
LG4	4_12610486_A_G	12610486	Liu et al., 2022a
LG4	4_12610490_A_T	12610490	Liu et al., 2022a
LG4	4_12610574_A_T	12610574	Liu et al., 2022a
LG4	4_12611137_T_C	12611137	Liu et al., 2022a
LG4	4_12611157_C_T	12611157	Liu et al., 2022a
LG4	4_12611172_T_G	12611172	Liu et al., 2022a
LG4	4_12611178_T_C	12611178	Liu et al., 2022a
LG4	4_12616782_G_A	12616782	Liu et al., 2022a
LG4	4_12617317_A_G	12617317	Liu et al., 2022a
LG4	4_12618754_G_A	12618754	Liu et al., 2022a
LG4	4_12629876_G_A	12629876	Liu et al., 2022a
LG4	4_12629876_G_A	12629876	Liu et al., 2022a
LG4	4_12631165_C_G	12631165	Liu et al., 2022a
LG4	4_12631894_A_G	12631894	Liu et al., 2022a
LG4	4_12631894_A_G	12631894	Liu et al., 2022a
LG4	4_12631903_A_T	12631903	Liu et al., 2022a
LG4	4_12631903_A_T	12631903	Liu et al., 2022a
LG4	4_12632401_T_C	12632401	Liu et al., 2022a
LG4	4_12632401_T_C	12632401	Liu et al., 2022a
LG4	4_12632407_G_A	12632407	Liu et al., 2022a
LG4	4_12632407_G_A	12632407	Liu et al., 2022a
LG4	4_12632446_T_C	12632446	Liu et al., 2022a
LG4	4_12632446_T_C	12632446	Liu et al., 2022a
LG4	4_12632555_T_A	12632555	Liu et al., 2022a
LG4	4_12632555_T_A	12632555	Liu et al., 2022a
LG4	4_12632558_G_A	12632558	Liu et al., 2022a
LG4	4_12632558_G_A	12632558	Liu et al., 2022a
LG4	4_12632746_G_A	12632746	Liu et al., 2022a
LG4	4_12632746_G_A	12632746	Liu et al., 2022a
LG4	4_12632914_T_C	12632914	Liu et al., 2022a
LG4	4_12632914_T_C	12632914	Liu et al., 2022a
LG4	4_12633224_G_A	12633224	Liu et al., 2022a
LG4	4_12633224_G_A	12633224	Liu et al., 2022a
LG4	4_12633390_T_G	12633390	Liu et al., 2022a
LG4	4_12633764_A_C	12633764	Liu et al., 2022a
LG4	4_12634047_T_C	12634047	Liu et al., 2022a
LG4	4_12634047_T_C	12634047	Liu et al., 2022a
LG4	4_12634134_C_T	12634134	Liu et al., 2022a
LG4	4_12634134_C_T	12634134	Liu et al., 2022a
LG4	4_12634320_T_C	12634320	Liu et al., 2022a
LG4	4_12634320_T_C	12634320	Liu et al., 2022a
LG4	4_12634509_T_G	12634509	Liu et al., 2022a
LG4	4_12634736_A_C	12634736	Liu et al., 2022a
LG4	4_12634736_A_C	12634736	Liu et al., 2022a
LG4	4_12634787_T_C	12634787	Liu et al., 2022a
LG4	4_12634787_T_C	12634787	Liu et al., 2022a
LG4	4_12634965_C_T	12634965	Liu et al., 2022a
LG4	4_12634989_A_C	12634989	Liu et al., 2022a
LG4	4_12635032_C_T	12635032	Liu et al., 2022a
LG4	4_12635032_C_T	12635032	Liu et al., 2022a
LG4	4_12635065_G_A	12635065	Liu et al., 2022a
LG4	4_12635065_G_A	12635065	Liu et al., 2022a
LG4	4_12635068_C_A	12635068	Liu et al., 2022a
LG4	4_12635068_C_A	12635068	Liu et al., 2022a
LG4	4_12635072_G_T	12635072	Liu et al., 2022a
LG4	4_12635072_G_T	12635072	Liu et al., 2022a
LG4	4_12635287_A_G	12635287	Liu et al., 2022a
LG4	4_12635287_A_G	12635287	Liu et al., 2022a
LG4	4_12635312_A_G	12635312	Liu et al., 2022a
LG4	4_12635312_A_G	12635312	Liu et al., 2022a
LG4	4_12635330_C_T	12635330	Liu et al., 2022a
LG4	4_12635330_C_T	12635330	Liu et al., 2022a
LG4	4_12635417_T_C	12635417	Liu et al., 2022a
LG4	4_12635417_T_C	12635417	Liu et al., 2022a
LG4	4_12635432_C_A	12635432	Liu et al., 2022a
LG4	4_12635432_C_A	12635432	Liu et al., 2022a
LG4	4_12635447_C_A	12635447	Liu et al., 2022a
LG4	4_12635447_C_A	12635447	Liu et al., 2022a
LG4	4_12635471_A_G	12635471	Liu et al., 2022a
LG4	4_12635471_A_G	12635471	Liu et al., 2022a
LG4	4_12635514_A_G	12635514	Liu et al., 2022a
LG4	4_12635514_A_G	12635514	Liu et al., 2022a
LG4	4_12635525_A_C	12635525	Liu et al., 2022a
LG4	4_12635525_A_C	12635525	Liu et al., 2022a
LG4	4_12635526_C_T	12635526	Liu et al., 2022a
LG4	4_12635526_C_T	12635526	Liu et al., 2022a
LG4	4_12635527_A_T	12635527	Liu et al., 2022a
LG4	4_12635527_A_T	12635527	Liu et al., 2022a
LG4	4_12635572_C_A	12635572	Liu et al., 2022a
LG4	4_12635572_C_A	12635572	Liu et al., 2022a
LG4	4_12635576_T_A	12635576	Liu et al., 2022a
LG4	4_12635576_T_A	12635576	Liu et al., 2022a
LG4	4_12635577_A_C	12635577	Liu et al., 2022a
LG4	4_12635577_A_C	12635577	Liu et al., 2022a
LG4	4_12635599_A_G	12635599	Liu et al., 2022a
LG4	4_12635599_A_G	12635599	Liu et al., 2022a
[truncated: 3,572 more rows]

## Sheet: Table S7
Table S7. Synteny and OrMQTL analysis of mungbean with pigeonpea and common bean genomes
Gene ID	Breeder's MQTL	Common bean gene ID	Chr	Gene start (bp)	Gene end (bp)	Common bean MQTL	Pigeonpea gene ID	Chr	Gene start (bp)	Gene end (bp)	Pigeonpea MQTL
Vradi01g04030	MQTLLG1-2
Vradi01g04040	MQTLLG1-2	PHAVU_004G163900g	4	44579988	44584052		C.cajan_12899	6	19695508	19699331
Vradi01g04050	MQTLLG1-2	PHAVU_004G163800g	4	44572819	44576577		C.cajan_12900	6	19703488	19706758
Vradi01g04060	MQTLLG1-2
Vradi01g04070	MQTLLG1-2	PHAVU_004G163700g	4	44566763	44570765		C.cajan_12901	6	19712603	19716664
Vradi01g04080	MQTLLG1-2	PHAVU_004G163600g	4	44561696	44563939		C.cajan_44079	KQ484700.1	2090	3463
Vradi01g04090	MQTLLG1-2
Vradi01g04100	MQTLLG1-2	PHAVU_004G163400g	4	44537220	44540884		C.cajan_44082	KQ484700.1	33409	36396
Vradi01g04110	MQTLLG1-2	PHAVU_004G163400g	4	44537220	44540884		C.cajan_44082	KQ484700.1	33409	36396
Vradi01g04120	MQTLLG1-2						C.cajan_27606	KQ483479.1	531150	532716
Vradi01g04130	MQTLLG1-2	PHAVU_004G163200g	4	44490441	44495810		C.cajan_27605	KQ483479.1	512267	518076
Vradi01g04140	MQTLLG1-2	PHAVU_004G163100g	4	44481381	44486547		C.cajan_27604	KQ483479.1	496653	501605
Vradi01g04150	MQTLLG1-2	PHAVU_004G162900g	4	44476195	44478410		C.cajan_27601	KQ483479.1	479502	479813
Vradi01g05360	MQTLLG1-3
Vradi01g05370	MQTLLG1-3	PHAVU_004G147700g	4	42824900	42826825	MQTL-YC4.4	C.cajan_37912	KQ483811.1	115160	116668
Vradi01g05380	MQTLLG1-3
Vradi01g05390	MQTLLG1-3	PHAVU_003G013400g	3	1241387	1244323
Vradi01g05400	MQTLLG1-3	PHAVU_004G147800g	4	42835942	42837073	MQTL-YC4.4	C.cajan_37913	KQ483811.1	142770	143714
Vradi01g05410	MQTLLG1-3	PHAVU_004G148000g	4	42854319	42858749	MQTL-YC4.4	C.cajan_37916	KQ483811.1	175576	179381
Vradi01g05420	MQTLLG1-3
Vradi01g05430	MQTLLG1-3	PHAVU_004G147600g	4	42814319	42818919	MQTL-YC4.4	C.cajan_37911	KQ483811.1	101725	102686
Vradi01g05440	MQTLLG1-3	PHAVU_004G147500g	4	42808030	42809733	MQTL-YC4.4	C.cajan_37910	KQ483811.1	89363	90805
Vradi01g05450	MQTLLG1-3	PHAVU_004G147400g	4	42785695	42793551	MQTL-YC4.4	C.cajan_37909	KQ483811.1	63100	71318
Vradi01g05460	MQTLLG1-3	PHAVU_004G147300g	4	42780463	42783138	MQTL-YC4.4	C.cajan_37908	KQ483811.1	53746	56869
Vradi01g05470	MQTLLG1-3	PHAVU_004G147100g	4	42766053	42769691		C.cajan_37906	KQ483811.1	25400	29248
Vradi01g05480	MQTLLG1-3	PHAVU_004G147000g	4	42761286	42764707		C.cajan_37907	KQ483811.1	48465	49863
Vradi01g05480	MQTLLG1-3	PHAVU_004G147000g	4	42761286	42764707		C.cajan_37905	KQ483811.1	7843	9383
Vradi01g05490	MQTLLG1-3	PHAVU_004G146900g	4	42754298	42758396		C.cajan_39857	KQ483789.1	201996	205946
Vradi01g05500	MQTLLG1-3	PHAVU_004G1468001g	4	42742932	42745259		C.cajan_39856	KQ483789.1	179330	190345
Vradi01g05510	MQTLLG1-3	PHAVU_004G146700g	4	42718694	42727044		C.cajan_39855	KQ483789.1	110797	128041
Vradi01g05520	MQTLLG1-3	PHAVU_004G146600g	4	42709454	42712519
Vradi01g05530	MQTLLG1-3	PHAVU_004G146500g	4	42704616	42706431		C.cajan_29784	KQ483503.1	278828	280300
Vradi01g05540	MQTLLG1-3	PHAVU_004G146400g	4	42697441	42702541		C.cajan_39853	KQ483789.1	96114	99560
Vradi01g05550	MQTLLG1-3	PHAVU_004G146300g	4	42688011	42695654		C.cajan_39852	KQ483789.1	82228	90421
Vradi01g05560	MQTLLG1-3	PHAVU_004G146200g	4	42678869	42679529
Vradi01g05870	MQTLLG1-4	PHAVU_004G141700g	4	42041420	42048045		C.cajan_15722	8	3697231	3703444
Vradi01g05880	MQTLLG1-4	PHAVU_004G141500g	4	42024568	42028855		C.cajan_15715	8	3658560	3659873
Vradi01g05890	MQTLLG1-4
Vradi01g05900	MQTLLG1-4	PHAVU_004G141300g	4	41987766	41989886		C.cajan_10361	3	23399306	23400826
Vradi01g05910	MQTLLG1-4	PHAVU_004G141200g	4	41982920	41986827		C.cajan_10362	3	23405028	23407626
Vradi01g05920	MQTLLG1-4	PHAVU_004G141100g	4	41971064	41974840		C.cajan_10363	3	23411942	23415066
Vradi01g05930	MQTLLG1-4	PHAVU_004G141000g	4	41963472	41966204		C.cajan_10365	3	23422642	23422974
Vradi01g05940	MQTLLG1-4	PHAVU_004G140900g	4	41959155	41960073		C.cajan_10366	3	23423922	23424716
Vradi01g05950	MQTLLG1-4	PHAVU_004G140400g	4	41920838	41922907		C.cajan_22460	9	3868314	3872082
Vradi01g06810	MQTLLG1-5	PHAVU_004G127100g	4	40268484	40274530		C.cajan_15898	8	5607528	5613076
Vradi01g06820	MQTLLG1-5	PHAVU_004G127000g	4	40259934	40264665		C.cajan_15896	8	5585370	5589075
Vradi01g06830	MQTLLG1-5	PHAVU_004G126600g	4	40225929	40250129		C.cajan_15892	8	5553001	5580949
Vradi01g06840	MQTLLG1-5	PHAVU_004G126500g	4	40204138	40205565		C.cajan_15886	8	5517246	5518538	CC_MQTL8.3
Vradi01g06850	MQTLLG1-5	PHAVU_004G126400g	4	40180852	40184964		C.cajan_15881	8	5483124	5486860	CC_MQTL8.3
Vradi01g06860	MQTLLG1-5	PHAVU_004G126300g	4	40168549	40171498		C.cajan_15879	8	5468785	5471214	CC_MQTL8.3
Vradi01g06870	MQTLLG1-5	PHAVU_004G126200g	4	40146687	40152911
Vradi01g06880	MQTLLG1-5
Vradi01g07350	MQTLLG1-6	PHAVU_004G035400g	4	3919544	3927584		C.cajan_08550	3	5147547	5154159
Vradi01g07360	MQTLLG1-6	PHAVU_010G148400g	10	41904123	41906437		C.cajan_00349	11	3385249	3386635
Vradi01g07370	MQTLLG1-6	PHAVU_003G114300g	3	28599004	28603037	MQTL-YC3.3	C.cajan_04066	11	44586100	44593763
Vradi01g07370	MQTLLG1-6	PHAVU_003G114300g	3	28599004	28603037	MQTL-YC3.3	C.cajan_35376	KQ483833.1	105916	111403
Vradi01g07370	MQTLLG1-6	PHAVU_006G118100g	6	23295917	23303038		C.cajan_04066	11	44586100	44593763
Vradi01g07370	MQTLLG1-6	PHAVU_006G118100g	6	23295917	23303038		C.cajan_35376	KQ483833.1	105916	111403
Vradi01g07380	MQTLLG1-6	PHAVU_004G035100g	4	3860627	3875267		C.cajan_22133	9	324444	342289
Vradi01g07380	MQTLLG1-6	PHAVU_004G035100g	4	3860627	3875267		C.cajan_22133	9	324444	342289
Vradi01g07390	MQTLLG1-6						C.cajan_22132	9	315347	318063
Vradi01g09140	MQTLLG1-8
Vradi01g09150	MQTLLG1-8	PHAVU_004G072200g	4	11229278	11235040	MQTL-YC4.2	C.cajan_40299	KQ483903.1	99843	107300
Vradi01g09160	MQTLLG1-8	PHAVU_004G072300g	4	11243289	11246644	MQTL-YC4.2	C.cajan_40300	KQ483903.1	109431	112235
Vradi01g09170	MQTLLG1-8	PHAVU_004G063200g	4	8564326	8574795		C.cajan_33393	KQ483497.1	246640	258240
Vradi01g09170	MQTLLG1-8	PHAVU_004G063400g	4	8707645	8712523	MQTL-YC4.2	C.cajan_33393	KQ483497.1	246640	258240
Vradi01g09180	MQTLLG1-8	PHAVU_004G063600g	4	8740884	8745638	MQTL-YC4.2	C.cajan_33398	KQ483497.1	371177	376522
Vradi01g09190	MQTLLG1-8	PHAVU_009G154200g	9	22399491	22401428		C.cajan_31044	KQ483527.1	294316	296351
Vradi01g09200	MQTLLG1-8	PHAVU_004G064700g	4	8994761	8997674	MQTL-YC4.2	C.cajan_13224	6	22707466	22708473
Vradi01g09210	MQTLLG1-8	PHAVU_004G071700g	4	10851595	10857908	MQTL-YC4.2	C.cajan_46346	KQ484353.1	30948	39379
Vradi01g09220	MQTLLG1-8
Vradi01g09230	MQTLLG1-8						C.cajan_42817	KQ484117.1	14626	16406
Vradi01g09230	MQTLLG1-8						C.cajan_42820	KQ484117.1	54854	56634
Vradi01g09240	MQTLLG1-8	PHAVU_006G112900g	6	22852423	22853143		C.cajan_41396	KQ484537.1	2614	4289
Vradi01g09240	MQTLLG1-8	PHAVU_006G112900g	6	22852423	22853143		C.cajan_48094	AGCT01072408.1	7107	8398
Vradi01g09240	MQTLLG1-8	PHAVU_006G112700g	6	22842035	22842782		C.cajan_41396	KQ484537.1	2614	4289
Vradi01g09240	MQTLLG1-8	PHAVU_006G112700g	6	22842035	22842782		C.cajan_48094	AGCT01072408.1	7107	8398
Vradi01g09240	MQTLLG1-8	PHAVU_004G064100g	4	8885613	8888113	MQTL-YC4.2	C.cajan_41396	KQ484537.1	2614	4289
Vradi01g09240	MQTLLG1-8	PHAVU_004G064100g	4	8885613	8888113	MQTL-YC4.2	C.cajan_48094	AGCT01072408.1	7107	8398
Vradi01g09240	MQTLLG1-8	PHAVU_004G050200g	4	6009604	6010313		C.cajan_41396	KQ484537.1	2614	4289
Vradi01g09240	MQTLLG1-8	PHAVU_004G050200g	4	6009604	6010313		C.cajan_48094	AGCT01072408.1	7107	8398
Vradi01g09240	MQTLLG1-8	PHAVU_006G112800g	6	22846925	22847773		C.cajan_41396	KQ484537.1	2614	4289
Vradi01g09240	MQTLLG1-8	PHAVU_006G112800g	6	22846925	22847773		C.cajan_48094	AGCT01072408.1	7107	8398
Vradi01g09240	MQTLLG1-8	PHAVU_004G052000g	4	6660899	6661614		C.cajan_41396	KQ484537.1	2614	4289
Vradi01g09240	MQTLLG1-8	PHAVU_004G052000g	4	6660899	6661614		C.cajan_48094	AGCT01072408.1	7107	8398
Vradi01g09250	MQTLLG1-8	PHAVU_004G071600g	4	10844540	10850401	MQTL-YC4.2	C.cajan_44378	KQ484884.1	46611	48947
Vradi01g09260	MQTLLG1-8	PHAVU_004G071500g	4	10829505	10831725	MQTL-YC4.2	C.cajan_11174	6	1663040	1666082
Vradi01g09270	MQTLLG1-8	PHAVU_004G071400g	4	10818219	10827175	MQTL-YC4.2	C.cajan_11179	6	1720912	1729168
Vradi01g09280	MQTLLG1-8	PHAVU_004G071300g	4	10780398	10785060	MQTL-YC4.2	C.cajan_11186	6	1767491	1770346
Vradi01g09280	MQTLLG1-8	PHAVU_004G071300g	4	10780398	10785060	MQTL-YC4.2	C.cajan_11183	6	1757566	1758640
Vradi01g09290	MQTLLG1-8	PHAVU_004G070800g	4	10687565	10689691	MQTL-YC4.2	C.cajan_44207	KQ484560.1	2132	4270
Vradi01g09300	MQTLLG1-8	PHAVU_004G071300g	4	10780398	10785060	MQTL-YC4.2	C.cajan_11186	6	1767491	1770346
Vradi01g09300	MQTLLG1-8	PHAVU_004G071300g	4	10780398	10785060	MQTL-YC4.2	C.cajan_11183	6	1757566	1758640	CC_MQTL6.1
Vradi01g09310	MQTLLG1-8
Vradi01g09320	MQTLLG1-8	PHAVU_010G006800g	10	1096234	1097676		C.cajan_27377	KQ483473.1	185295	186080
Vradi01g09330	MQTLLG1-8	PHAVU_004G069200g	4	10361547	10365040	MQTL-YC4.2
Vradi01g09340	MQTLLG1-8	PHAVU_004G069300g	4	10382034	10393141	MQTL-YC4.2	C.cajan_11359	6	3661995	3669547	CC_MQTL6.1
Vradi01g09350	MQTLLG1-8	PHAVU_004G069400g	4	10397684	10398980	MQTL-YC4.2	C.cajan_28990	KQ483442.1	17804	18490
Vradi01g09360	MQTLLG1-8
Vradi01g09370	MQTLLG1-8	PHAVU_004G069600g	4	10438149	10447316	MQTL-YC4.2	C.cajan_28992	KQ483442.1	37945	44297
Vradi01g09380	MQTLLG1-8	PHAVU_004G069700g	4	10469930	10472509	MQTL-YC4.2	C.cajan_28994	KQ483442.1	68405	70753
Vradi01g09390	MQTLLG1-8	PHAVU_004G069800g	4	10472510	10474755	MQTL-YC4.2	C.cajan_28995	KQ483442.1	71470	71877
Vradi01g09400	MQTLLG1-8	PHAVU_004G069900g	4	10524334	10526517	MQTL-YC4.2	C.cajan_36119	KQ483764.1	197324	198628
Vradi01g09410	MQTLLG1-8	PHAVU_004G070100g	4	10553612	10564573	MQTL-YC4.2	C.cajan_32653	KQ483518.1	122437	129779
Vradi01g11620	MQTLLG1-9	PHAVU_004G080900g	4	13942319	13945638		C.cajan_16151	8	9183465	9187964
Vradi01g11630	MQTLLG1-9	PHAVU_004G080800g	4	13912531	13918794		C.cajan_16153	8	9237439	9238783
Vradi01g11640	MQTLLG1-9	PHAVU_004G080700g	4	13857948	13859844		C.cajan_16154	8	9254814	9256111
Vradi02g00260	MQTLLG2-1	PHAVU_011G002700g	11	193351	207418		C.cajan_21788	4	8934301	8950727
Vradi02g00270	MQTLLG2-1	PHAVU_011G002800g	11	208584	210191		C.cajan_23836	KQ483412.1	1359835	1360230
Vradi02g00280	MQTLLG2-1	PHAVU_011G002900g	11	213343	232401		C.cajan_21786	4	8905711	8919728
Vradi02g00290	MQTLLG2-1	PHAVU_011G003000g	11	233514	235956		C.cajan_21785	4	8902245	8903093
Vradi02g00300	MQTLLG2-1	PHAVU_011G003100g	11	237814	240513		C.cajan_21784	4	8895002	8896981
Vradi02g00310	MQTLLG2-1	PHAVU_011G003200g	11	241401	246164		C.cajan_21783	4	8890734	8893825
Vradi02g00320	MQTLLG2-1
Vradi02g00330	MQTLLG2-1	PHAVU_011G003400g	11	256806	262081		C.cajan_21779	4	8840268	8844227
Vradi02g00340	MQTLLG2-1
Vradi02g00350	MQTLLG2-1	PHAVU_011G003500g	11	270634	273175		C.cajan_21778	4	8835280	8837205
Vradi02g00360	MQTLLG2-1	PHAVU_011G003600g	11	273997	276175		C.cajan_21777	4	8832521	8834199
Vradi02g01650	MQTLLG2-2	PHAVU_011G021400g	11	1673289	1677007		C.cajan_21012	4	1451677	1454995
Vradi02g01660	MQTLLG2-2	PHAVU_011G021500g	11	1680810	1685899		C.cajan_21013	4	1462685	1467630
Vradi02g01670	MQTLLG2-2	PHAVU_011G021600g	11	1686678	1689815		C.cajan_21014	4	1470949	1473726
Vradi02g01680	MQTLLG2-2	PHAVU_011G021700g	11	1691625	1694036		C.cajan_21015	4	1477905	1480115
Vradi02g01690	MQTLLG2-2	PHAVU_011G021800g	11	1698087	1702356		C.cajan_21016	4	1485115	1488919
Vradi02g01700	MQTLLG2-2	PHAVU_011G021900g	11	1713567	1716986		C.cajan_21017	4	1505234	1508331
Vradi02g01710	MQTLLG2-2	PHAVU_011G022000g	11	1722788	1725221
Vradi02g01720	MQTLLG2-2	PHAVU_011G022100g	11	1726098	1733564		C.cajan_21020	4	1519427	1529051
Vradi02g01730	MQTLLG2-2	PHAVU_011G022300g	11	1741547	1744123		C.cajan_21021	4	1535610	1538477
Vradi02g01740	MQTLLG2-2	PHAVU_011G022600g	11	1773845	1777127		C.cajan_21024	4	1571511	1574683
Vradi02g01750	MQTLLG2-2	PHAVU_011G022700g	11	1779661	1788036		C.cajan_21025	4	1579289	1585066
Vradi02g01760	MQTLLG2-2	PHAVU_011G022800g	11	1793962	1799585		C.cajan_21028	4	1601806	1605556
Vradi02g01770	MQTLLG2-2	PHAVU_011G023200g	11	1837630	1842743		C.cajan_21033	4	1653599	1657793
Vradi02g01780	MQTLLG2-2	PHAVU_011G023300g	11	1843865	1847848		C.cajan_21034	4	1661479	1664700
Vradi02g03490	MQTLLG2-3	PHAVU_011G047200g	11	4091617	4093455		C.cajan_11969	6	9783522	9785119	CC_MQTL6.1
Vradi02g03500	MQTLLG2-3	PHAVU_011G047300g	11	4095798	4100173		C.cajan_11968	6	9777955	9781991	CC_MQTL6.1
Vradi02g03510	MQTLLG2-3	PHAVU_011G047500g	11	4111331	4113035		C.cajan_11966	6	9762147	9763268	CC_MQTL6.1
Vradi02g03510	MQTLLG2-3	PHAVU_011G047500g	11	4111331	4113035		C.cajan_40162	KQ484479.1	48722	49843
Vradi02g03520	MQTLLG2-3	PHAVU_011G047600g	11	4114903	4118496		C.cajan_11964	6	9754314	9756308
Vradi02g03530	MQTLLG2-3	PHAVU_011G047700g	11	4122254	4133708		C.cajan_11963	6	9726743	9738834
Vradi02g03540	MQTLLG2-3	PHAVU_011G047800g	11	4135609	4141016		C.cajan_11962	6	9720131	9723466
Vradi02g03550	MQTLLG2-3	PHAVU_011G047900g	11	4140825	4143829		C.cajan_11961	6	9715733	9718402
Vradi02g03560	MQTLLG2-3	PHAVU_011G048000g	11	4158306	4162884		C.cajan_11960	6	9703517	9707397
Vradi02g04000	MQTLLG2-4	PHAVU_011G053300g	11	4526035	4532862		C.cajan_11903	6	9308422	9315490
Vradi02g04010	MQTLLG2-4	PHAVU_011G053400g	11	4540342	4544544		C.cajan_11902	6	9295846	9300221
Vradi02g04020	MQTLLG2-4	PHAVU_011G053500g	11	4546245	4551062		C.cajan_11901	6	9287764	9290858
Vradi02g04030	MQTLLG2-4	PHAVU_011G053600g	11	4554377	4555916		C.cajan_11899	6	9270955	9271770
Vradi02g04030	MQTLLG2-4	PHAVU_011G053600g	11	4554377	4555916		C.cajan_01484	11	16171181	16171996
Vradi02g04040	MQTLLG2-4	PHAVU_011G053700g	11	4560575	4563814		C.cajan_11897	6	9254615	9258076
Vradi02g04050	MQTLLG2-4	PHAVU_011G053800g	11	4564534	4568542		C.cajan_11896	6	9248809	9251673
Vradi02g04060	MQTLLG2-4	PHAVU_011G053900g	11	4574584	4578590		C.cajan_11895	6	9239032	9243001
Vradi02g04070	MQTLLG2-4	PHAVU_011G054000g	11	4578635	4581159		C.cajan_11894	6	9235208	9236961
Vradi02g04080	MQTLLG2-4	PHAVU_011G054100g	11	4583824	4584276		C.cajan_11893	6	9231858	9232334
Vradi02g04090	MQTLLG2-4	PHAVU_011G0542000g	11	4594044	4598841		C.cajan_31222	KQ483498.1	4488	6490
Vradi02g04100	MQTLLG2-4	PHAVU_011G054300g	11	4602210	4605788
Vradi02g04110	MQTLLG2-4	PHAVU_011G054400g	11	4615095	4633278		C.cajan_30726	KQ483562.1	88301	105484
Vradi02g04110	MQTLLG2-4	PHAVU_011G054400g	11	4615095	4633278		C.cajan_30726	KQ483562.1	88301	105484
Vradi02g04120	MQTLLG2-4	PHAVU_011G054500g	11	4637899	4639252		C.cajan_30725	KQ483562.1	80510	81289
Vradi02g04130	MQTLLG2-4	PHAVU_011G054600g	11	4640313	4644719		C.cajan_30724	KQ483562.1	75050	79027
Vradi02g04130	MQTLLG2-4	PHAVU_011G054600g	11	4640313	4644719		C.cajan_30724	KQ483562.1	75050	79027
Vradi02g04140	MQTLLG2-4	PHAVU_011G054800g	11	4663347	4674148		C.cajan_30723	KQ483562.1	59152	69957
Vradi02g04150	MQTLLG2-4	PHAVU_011G054900g	11	4675711	4683904		C.cajan_30722	KQ483562.1	49318	55825
Vradi02g04160	MQTLLG2-4	PHAVU_011G055000g	11	4686031	4693941		C.cajan_30721	KQ483562.1	37789	41011
Vradi02g04170	MQTLLG2-4	PHAVU_011G055100g	11	4702294	4707687		C.cajan_30720	KQ483562.1	18822	22070
Vradi02g04180	MQTLLG2-4	PHAVU_009G193400g	9	28673326	28695609		C.cajan_26888	KQ483474.1	329076	329970
Vradi02g04190	MQTLLG2-4	PHAVU_011G055200g	11	4708726	4711501
Vradi02g04200	MQTLLG2-4	PHAVU_011G055300g	11	4712355	4713884		C.cajan_30719	KQ483562.1	11539	12351
Vradi02g04210	MQTLLG2-4	PHAVU_011G055400g	11	4719324	4723394		C.cajan_30718	KQ483562.1	4759	9022
Vradi02g04220	MQTLLG2-4	PHAVU_011G055500g	11	4724950	4732978		C.cajan_21246	4	3620298	3628159	CC_MQTL4.5
Vradi02g04230	MQTLLG2-4	PHAVU_011G055600g	11	4734550	4736307		C.cajan_21245	4	3607962	3608348	CC_MQTL4.5
Vradi02g06800	MQTLLG2-5	PHAVU_011G092100g	11	9240332	9242012		C.cajan_21661	4	7692373	7693884
Vradi02g06810	MQTLLG2-5	PHAVU_011G092200g	11	9276645	9282836		C.cajan_21662	4	7741255	7747756
Vradi02g06820	MQTLLG2-5	PHAVU_011G1804001g	11	45618718	45634453		C.cajan_40039	KQ484377.1	50298	58882
Vradi02g06830	MQTLLG2-5	PHAVU_011G1804001g	11	45618718	45634453		C.cajan_40039	KQ484377.1	50298	58882
Vradi02g06840	MQTLLG2-5	PHAVU_011G092400g	11	9313993	9320104
Vradi02g06840	MQTLLG2-5	PHAVU_011G134800g	11	30835269	30839794
Vradi02g06840	MQTLLG2-5	PHAVU_011G092300g	11	9289761	9293893
Vradi03g00230	MQTLLG3-1	PHAVU_010G086900g	10	32451396	32457200		C.cajan_09564	3	15731335	15736877
Vradi03g00240	MQTLLG3-1	PHAVU_001G142800g	1	39212910	39214604		C.cajan_09565	3	15738349	15740070
Vradi03g00250	MQTLLG3-1
Vradi03g00260	MQTLLG3-1	PHAVU_001G143400g	1	39306927	39309363		C.cajan_09571	3	15789943	15791247
Vradi03g00270	MQTLLG3-1	PHAVU_001G143500g	1	39332600	39334158		C.cajan_09572	3	15809897	15810722
Vradi03g00280	MQTLLG3-1	PHAVU_001G143600g	1	39341163	39344324		C.cajan_09573	3	15816541	15819211
Vradi03g00290	MQTLLG3-1	PHAVU_001G143700g	1	39366107	39367905		C.cajan_09574	3	15838062	15840291
Vradi03g00300	MQTLLG3-1	PHAVU_001G143800g	1	39371541	39373283		C.cajan_09575	3	15854117	15855340
Vradi03g00310	MQTLLG3-1	PHAVU_001G143900g	1	39385867	39388690		C.cajan_09576	3	15860916	15863584
Vradi03g00320	MQTLLG3-1	PHAVU_001G144000g	1	39390648	39395399		C.cajan_09577	3	15869611	15872250
Vradi03g00680	MQTLLG3-2	PHAVU_001G149600g	1	40293362	40304082		C.cajan_34244	KQ483678.1	235332	241832
Vradi03g00690	MQTLLG3-2	PHAVU_001G149800g	1	40323257	40323849
Vradi03g00700	MQTLLG3-2	PHAVU_001G149900g	1	40328582	40332533		C.cajan_34242	KQ483678.1	216754	217875
Vradi03g00710	MQTLLG3-2	PHAVU_001G150000g	1	40343526	40347528		C.cajan_34241	KQ483678.1	203669	206884
Vradi03g00720	MQTLLG3-2	PHAVU_001G150100g	1	40348728	40349132		C.cajan_34240	KQ483678.1	201494	201949
Vradi03g00730	MQTLLG3-2	PHAVU_001G150200g	1	40350685	40352557		C.cajan_34239	KQ483678.1	197034	200211
Vradi03g00740	MQTLLG3-2	PHAVU_001G1503001g	1	40413941	40420139		C.cajan_34237	KQ483678.1	158088	170002
Vradi03g00740	MQTLLG3-2	PHAVU_001G1503000g	1	40427071	40428154		C.cajan_34237	KQ483678.1	158088	170002
Vradi03g00750	MQTLLG3-2	PHAVU_001G150400g	1	40428839	40432615		C.cajan_34236	KQ483678.1	152975	155854
Vradi03g00760	MQTLLG3-2	PHAVU_001G150500g	1	40445613	40453158		C.cajan_34235	KQ483678.1	144160	151625
Vradi03g00760	MQTLLG3-2	PHAVU_001G150500g	1	40445613	40453158		C.cajan_34235	KQ483678.1	144160	151625
Vradi03g00770	MQTLLG3-2	PHAVU_001G150700g	1	40468224	40476821		C.cajan_34232	KQ483678.1	112698	121486
Vradi03g00780	MQTLLG3-2
Vradi03g00790	MQTLLG3-2	PHAVU_001G150900g	1	40529098	40531728		C.cajan_34229	KQ483678.1	68227	69143
Vradi03g00800	MQTLLG3-2	PHAVU_001G151000g	1	40544113	40546330		C.cajan_34228	KQ483678.1	62666	64436
Vradi03g00810	MQTLLG3-2	PHAVU_001G151100g	1	40595652	40598400		C.cajan_34227	KQ483678.1	52498	53479
Vradi03g00810	MQTLLG3-2	PHAVU_001G151100g	1	40595652	40598400		C.cajan_34227	KQ483678.1	52498	53479
Vradi03g00820	MQTLLG3-2	PHAVU_001G151200g	1	40598957	40603268		C.cajan_34226	KQ483678.1	47107	51120
Vradi03g00830	MQTLLG3-2	PHAVU_001G151300g	1	40608279	40612919		C.cajan_34225	KQ483678.1	23795	32336
Vradi03g00840	MQTLLG3-2	PHAVU_001G151400g	1	40654529	40656215		C.cajan_09659	3	16807079	16808315
Vradi03g00850	MQTLLG3-2	PHAVU_001G151600g	1	40674211	40679650
Vradi03g00850	MQTLLG3-2	PHAVU_001G151600g	1	40674211	40679650
Vradi03g00860	MQTLLG3-2	PHAVU_001G152000g	1	40726222	40729145		C.cajan_09653	3	16685412	16687147
Vradi03g00860	MQTLLG3-2	PHAVU_001G152000g	1	40726222	40729145		C.cajan_09655	3	16698611	16700934
Vradi03g00860	MQTLLG3-2	PHAVU_001G152000g	1	40726222	40729145		C.cajan_42125	KQ483960.1	78141	79882
Vradi03g00860	MQTLLG3-2	PHAVU_001G152000g	1	40726222	40729145		C.cajan_09656	3	16724708	16725949
Vradi03g00860	MQTLLG3-2	PHAVU_001G152000g	1	40726222	40729145		C.cajan_09652	3	16669386	16672751
Vradi03g00860	MQTLLG3-2	PHAVU_001G152000g	1	40726222	40729145		C.cajan_09657	3	16745148	16747435
Vradi03g00860	MQTLLG3-2	PHAVU_001G152000g	1	40726222	40729145		C.cajan_42126	KQ483960.1	93474	100506
Vradi03g00870	MQTLLG3-2	PHAVU_001G152100g	1	40757206	40764770		C.cajan_09650	3	16631486	16639151
Vradi03g00880	MQTLLG3-2	PHAVU_001G152200g	1	40807124	40819392		C.cajan_09649	3	16602517	16612996
Vradi03g00890	MQTLLG3-2	PHAVU_005G035400g	5	3312763	3313998		C.cajan_09647	3	16599040	16602136
Vradi03g00900	MQTLLG3-2	PHAVU_001G152400g	1	40834077	40842208		C.cajan_34659	KQ483672.1	184367	188235
Vradi03g00910	MQTLLG3-2	PHAVU_001G152500g	1	40846723	40849164		C.cajan_09644	3	16587441	16588994
Vradi03g00920	MQTLLG3-2	PHAVU_001G152600g	1	40850222	40851793		C.cajan_09643	3	16585077	16585982
Vradi03g00930	MQTLLG3-2	PHAVU_001G152800g	1	40874296	40875057		C.cajan_09642	3	16542778	16543229
Vradi03g00940	MQTLLG3-2	PHAVU_001G152900g	1	40882561	40888574		C.cajan_09640	3	16476370	16482834
Vradi03g00950	MQTLLG3-2
Vradi03g00960	MQTLLG3-2
Vradi03g00970	MQTLLG3-2	PHAVU_001G153200g	1	40946724	40948989		C.cajan_30819	KQ483570.1	337105	338125
Vradi03g00980	MQTLLG3-2	PHAVU_001G153400g	1	40976531	40977886		C.cajan_30817	KQ483570.1	314941	315978
Vradi03g00990	MQTLLG3-2	PHAVU_001G153500g	1	41000278	41001805		C.cajan_30816	KQ483570.1	304734	305108
Vradi03g01000	MQTLLG3-2	PHAVU_001G153700g	1	41015270	41019057		C.cajan_30814	KQ483570.1	293439	295790
Vradi03g01010	MQTLLG3-2	PHAVU_001G153800g	1	41020353	41025110		C.cajan_30813	KQ483570.1	281584	284574
Vradi03g01020	MQTLLG3-2	PHAVU_001G153900g	1	41034101	41039378		C.cajan_30812	KQ483570.1	257465	261486
Vradi03g01030	MQTLLG3-2	PHAVU_001G154100g	1	41064833	41072243		C.cajan_30811	KQ483570.1	238467	244980
Vradi03g01040	MQTLLG3-2						C.cajan_30810	KQ483570.1	236301	237820
Vradi03g01050	MQTLLG3-2	PHAVU_001G154200g	1	41080510	41087797		C.cajan_30809	KQ483570.1	227152	234087
Vradi03g01060	MQTLLG3-2	PHAVU_001G154300g	1	41130674	41137899		C.cajan_30808	KQ483570.1	202373	207350
Vradi03g01060	MQTLLG3-2	PHAVU_001G154300g	1	41130674	41137899		C.cajan_30808	KQ483570.1	202373	207350
Vradi03g01070	MQTLLG3-2	PHAVU_001G154400g	1	41152935	41156780		C.cajan_30807	KQ483570.1	185609	189027
Vradi03g01080	MQTLLG3-2	PHAVU_001G154500g	1	41157022	41159637		C.cajan_30806	KQ483570.1	182849	184439
Vradi03g01090	MQTLLG3-2	PHAVU_001G154600g	1	41165637	41174813		C.cajan_30805	KQ483570.1	168509	175858
Vradi03g01100	MQTLLG3-2	PHAVU_001G154700g	1	41183051	41185997		C.cajan_30804	KQ483570.1	157822	159747
Vradi03g01110	MQTLLG3-2	PHAVU_001G154800g	1	41211931	41216156		C.cajan_46090	KQ485160.1	28785	31975
Vradi03g01120	MQTLLG3-2	PHAVU_001G155000g	1	41246244	41247518
Vradi03g01130	MQTLLG3-2
Vradi03g01140	MQTLLG3-2	PHAVU_001G155400g	1	41292521	41293336		C.cajan_35777	KQ483709.1	233679	234443
Vradi03g01140	MQTLLG3-2	PHAVU_001G155400g	1	41292521	41293336		C.cajan_00951	11	10153069	10153833
Vradi03g01150	MQTLLG3-2	PHAVU_001G155500g	1	41303946	41310644		C.cajan_00952	11	10161229	10167315
Vradi03g01160	MQTLLG3-2
Vradi03g01170	MQTLLG3-2
Vradi03g01180	MQTLLG3-2	PHAVU_001G155800g	1	41325120	41326070		C.cajan_00955	11	10179746	10180443
Vradi03g01190	MQTLLG3-2	PHAVU_001G155900g	1	41347890	41350016		C.cajan_00957	11	10191534	10192775
Vradi03g01200	MQTLLG3-2	PHAVU_001G156000g	1	41362979	41370307		C.cajan_00958	11	10206849	10212383
Vradi03g01210	MQTLLG3-2	PHAVU_001G156200g	1	41380169	41385007		C.cajan_00959	11	10213335	10217587
Vradi03g01220	MQTLLG3-2	PHAVU_001G156400g	1	41414793	41418733		C.cajan_00960	11	10226934	10230504
Vradi03g01230	MQTLLG3-2	PHAVU_001G156500g	1	41428482	41429980		C.cajan_00961	11	10241177	10241695
Vradi03g01240	MQTLLG3-2
Vradi03g01250	MQTLLG3-2	PHAVU_001G156700g	1	41461330	41466771		C.cajan_00963	11	10268872	10282558
Vradi03g01250	MQTLLG3-2	PHAVU_001G156700g	1	41461330	41466771		C.cajan_00963	11	10268872	10282558
Vradi03g01260	MQTLLG3-2	PHAVU_001G156800g	1	41467452	41472476
Vradi03g01270	MQTLLG3-2	PHAVU_001G156900g	1	41486145	41489703		C.cajan_00965	11	10289507	10293385
Vradi03g01270	MQTLLG3-2	PHAVU_001G156900g	1	41486145	41489703		C.cajan_47666	AGCT01025636.1	3	932
Vradi03g01280	MQTLLG3-2
Vradi03g01290	MQTLLG3-2	PHAVU_001G157100g	1	41516722	41517643		C.cajan_00966	11	10294120	10295025
Vradi03g01300	MQTLLG3-2	PHAVU_001G157200g	1	41518368	41524944		C.cajan_00986	11	10456204	10458120
Vradi03g01300	MQTLLG3-2	PHAVU_001G157200g	1	41518368	41524944		C.cajan_00967	11	10295891	10301532
Vradi03g01310	MQTLLG3-2	PHAVU_001G157300g	1	41538383	41542319		C.cajan_00989	11	10494355	10495138
Vradi03g01310	MQTLLG3-2	PHAVU_001G157300g	1	41538383	41542319		C.cajan_00968	11	10315166	10318308
Vradi03g01320	MQTLLG3-2	PHAVU_001G157400g	1	41544280	41551058		C.cajan_00969	11	10327777	10332965
Vradi03g01330	MQTLLG3-2	PHAVU_001G157500g	1	41573056	41574153		C.cajan_00970	11	10336238	10336813
Vradi03g01340	MQTLLG3-2	PHAVU_001G157600g	1	41586154	41586630		C.cajan_00972	11	10364267	10364668
Vradi03g02260	MQTLLG3-3	PHAVU_001G135100g	1	37991903	37994564	MQTL-YC1.4	C.cajan_09481	3	14836780	14839490
Vradi03g02270	MQTLLG3-3	PHAVU_001G134900g	1	37969769	37971616	MQTL-YC1.4	C.cajan_09478	3	14826986	14828470
Vradi03g02280	MQTLLG3-3	PHAVU_001G134800g	1	37959260	37966931	MQTL-YC1.4	C.cajan_09477	3	14808956	14822980
Vradi03g02290	MQTLLG3-3	PHAVU_001G134600g	1	37948400	37952635	MQTL-YC1.4	C.cajan_09475	3	14793316	14796467
Vradi03g02300	MQTLLG3-3	PHAVU_001G1332001g	1	37628437	37629163	MQTL-YC1.4	C.cajan_09473	3	14746328	14764913
Vradi03g02300	MQTLLG3-3	PHAVU_001G1332000g	1	37632633	37656119	MQTL-YC1.4	C.cajan_09473	3	14746328	14764913
Vradi03g02310	MQTLLG3-3						C.cajan_31353	KQ483511.1	14086	19726
Vradi03g02320	MQTLLG3-3
Vradi03g02330	MQTLLG3-3	PHAVU_001G132200g	1	37394733	37401486	MQTL-YC1.4	C.cajan_09467	3	14674205	14679849
Vradi03g02340	MQTLLG3-3	PHAVU_001G132100g	1	37373017	37377149	MQTL-YC1.4	C.cajan_09466	3	14663342	14667948
Vradi03g02350	MQTLLG3-3	PHAVU_001G131900g	1	37359220	37362362	MQTL-YC1.4	C.cajan_09465	3	14654789	14655562
Vradi03g02360	MQTLLG3-3	PHAVU_001G131700g	1	37318285	37329805	MQTL-YC1.4	C.cajan_09464	3	14628606	14638218
Vradi03g02370	MQTLLG3-3	PHAVU_001G131500g	1	37254149	37261757	MQTL-YC1.4	C.cajan_09462	3	14585036	14590609
Vradi03g02380	MQTLLG3-3
Vradi03g02380	MQTLLG3-3
Vradi03g02390	MQTLLG3-3
Vradi03g02400	MQTLLG3-3						C.cajan_09456	3	14507414	14510213
Vradi03g02410	MQTLLG3-3	PHAVU_001G130900g	1	37058999	37061900	MQTL-YC1.4
Vradi03g02420	MQTLLG3-3	PHAVU_001G130800g	1	37016380	37019136	MQTL-YC1.4	C.cajan_03280	11	36044654	36050405
Vradi03g02430	MQTLLG3-3	PHAVU_001G130700g	1	36984197	36987468	MQTL-YC1.4	C.cajan_09455	3	14492436	14496202
Vradi03g02440	MQTLLG3-3	PHAVU_001G130500g	1	36950862	36957066	MQTL-YC1.4	C.cajan_09454	3	14483690	14487772
Vradi03g02450	MQTLLG3-3	PHAVU_001G130300g	1	36916261	36924045	MQTL-YC1.4	C.cajan_09453	3	14470358	14477936
Vradi03g02460	MQTLLG3-3	PHAVU_001G130200g	1	36911989	36914461	MQTL-YC1.4	C.cajan_09452	3	14465152	14467150
Vradi03g02470	MQTLLG3-3
Vradi03g02480	MQTLLG3-3	PHAVU_001G130000g	1	36875520	36879132	MQTL-YC1.4	C.cajan_09451	3	14435576	14438750
Vradi03g02770	MQTLLG3-4	PHAVU_001G167900g	1	42933290	42952171		C.cajan_09720	3	17438967	17453733
Vradi03g02770	MQTLLG3-4	PHAVU_001G167900g	1	42933290	42952171		C.cajan_09720	3	17438967	17453733
Vradi03g06990	MQTLLG3-5	PHAVU_001G219100g	1	48175384	48176743		C.cajan_10674	3	26601908	26602851
Vradi03g07000	MQTLLG3-5	PHAVU_001G219200g	1	48179963	48185922		C.cajan_10673	3	26587501	26592530
Vradi03g07010	MQTLLG3-5	PHAVU_001G219300g	1	48191243	48193902		C.cajan_10672	3	26582156	26583690
Vradi03g07020	MQTLLG3-5	PHAVU_001G219400g	1	48193884	48196365		C.cajan_10671	3	26578718	26580980
Vradi03g07030	MQTLLG3-5	PHAVU_001G219500g	1	48206175	48211710		C.cajan_10670	3	26559572	26566479
Vradi03g07040	MQTLLG3-5	PHAVU_001G230900g	1	49215260	49219041		C.cajan_19576	1	3913600	3915953
Vradi03g07050	MQTLLG3-5	PHAVU_001G219700g	1	48217860	48218892		C.cajan_10667	3	26549745	26550811
Vradi03g07060	MQTLLG3-5	PHAVU_001G219800g	1	48233258	48236867		C.cajan_10666	3	26540039	26542746
Vradi03g07070	MQTLLG3-5	PHAVU_001G219900g	1	48238848	48245168		C.cajan_10665	3	26531539	26534252
Vradi03g07080	MQTLLG3-5	PHAVU_001G220000g	1	48246213	48260301		C.cajan_10664	3	26516803	26528422
Vradi03g07090	MQTLLG3-5	PHAVU_001G220100g	1	48264157	48272272		C.cajan_10663	3	26506392	26511774
Vradi03g07100	MQTLLG3-5	PHAVU_001G220300g	1	48277479	48296290		C.cajan_10661	3	26479802	26496462
Vradi03g07110	MQTLLG3-5	PHAVU_001G220500g	1	48299401	48305198		C.cajan_10659	3	26468276	26473897
Vradi03g07120	MQTLLG3-5	PHAVU_001G220600g	1	48307639	48312835		C.cajan_10655	3	26453953	26459223
Vradi03g07130	MQTLLG3-5
Vradi03g07140	MQTLLG3-5	PHAVU_001G220700g	1	48317337	48318376		C.cajan_10654	3	26445508	26445795
Vradi03g07150	MQTLLG3-5	PHAVU_001G220900g	1	48329312	48335156		C.cajan_10652	3	26432548	26437264
Vradi04g09370	MQTLLG4-4	PHAVU_008G031000g	8	2551112	2553533		C.cajan_41336	KQ484382.1	64942	68368
Vradi04g09380	MQTLLG4-4	PHAVU_008G030300g	8	2489539	2490193		C.cajan_27389	KQ483473.1	364643	365017
Vradi04g09390	MQTLLG4-4						C.cajan_08046	3	63713	64006
Vradi04g09400	MQTLLG4-4	PHAVU_005G139800g	5	36872155	36875782		C.cajan_13592	10	2509522	2512041
Vradi04g09400	MQTLLG4-4	PHAVU_005G139800g	5	36872155	36875782		C.cajan_21432	4	5177631	5180144	CC_MQTL4.5
Vradi04g09400	MQTLLG4-4	PHAVU_011G069600g	11	6076578	6080161		C.cajan_13592	10	2509522	2512041
Vradi04g09400	MQTLLG4-4	PHAVU_011G069600g	11	6076578	6080161		C.cajan_21432	4	5177631	5180144	CC_MQTL4.5
Vradi04g09400	MQTLLG4-4	PHAVU_008G000200g	8	135850	138144		C.cajan_13592	10	2509522	2512041
Vradi04g09400	MQTLLG4-4	PHAVU_008G000200g	8	135850	138144		C.cajan_21432	4	5177631	5180144	CC_MQTL4.5
Vradi04g09410	MQTLLG4-4						C.cajan_15259	10	21507741	21509423
Vradi04g09410	MQTLLG4-4						C.cajan_15258	10	21475223	21482041
Vradi04g09410	MQTLLG4-4						C.cajan_33021	KQ483536.1	265185	267413
Vradi04g09410	MQTLLG4-4						C.cajan_08227	3	1805029	1806610
Vradi04g09420	MQTLLG4-4	PHAVU_008G029400g	8	2429215	2430844		C.cajan_27393	KQ483473.1	420984	421952
Vradi04g09430	MQTLLG4-4	PHAVU_008G029300g	8	2422343	2427346		C.cajan_27394	KQ483473.1	435494	438097
Vradi04g09440	MQTLLG4-4	PHAVU_008G029100g	8	2408631	2412334		C.cajan_27395	KQ483473.1	442498	455326
Vradi04g09450	MQTLLG4-4	PHAVU_008G029000g	8	2406210	2408577		C.cajan_27396	KQ483473.1	456007	458265
Vradi04g09460	MQTLLG4-4	PHAVU_008G028900g	8	2400071	2402518		C.cajan_27397	KQ483473.1	464411	466864
Vradi04g09470	MQTLLG4-4	PHAVU_008G028800g	8	2392230	2396586		C.cajan_27398	KQ483473.1	472700	476016
Vradi04g09480	MQTLLG4-4	PHAVU_008G028700g	8	2372627	2373612		C.cajan_27402	KQ483473.1	517084	517633
Vradi04g09490	MQTLLG4-4
Vradi04g09500	MQTLLG4-4						C.cajan_45444	KQ485066.1	33963	36431
Vradi04g09500	MQTLLG4-4						C.cajan_38663	KQ484134.1	39546	42709
Vradi04g09510	MQTLLG4-4	PHAVU_008G028000g	8	2327991	2329724		C.cajan_38664	KQ484134.1	57453	59010
Vradi04g09520	MQTLLG4-4	PHAVU_008G027900g	8	2315794	2321854
Vradi04g09530	MQTLLG4-4	PHAVU_008G027800g	8	2299894	2307811		C.cajan_38667	KQ484134.1	92348	101111
Vradi04g09540	MQTLLG4-4	PHAVU_008G027700g	8	2294232	2299412		C.cajan_38668	KQ484134.1	103765	108169
Vradi04g09540	MQTLLG4-4	PHAVU_008G027700g	8	2294232	2299412		C.cajan_38668	KQ484134.1	103765	108169
Vradi04g09550	MQTLLG4-4	PHAVU_008G027600g	8	2289215	2291362		C.cajan_20095	1	9437505	9439588
Vradi04g09550	MQTLLG4-4	PHAVU_008G027600g	8	2289215	2291362		C.cajan_20095	1	9437505	9439588
Vradi04g09560	MQTLLG4-4	PHAVU_008G027500g	8	2281913	2288275		C.cajan_20096	1	9450430	9451793
Vradi04g09570	MQTLLG4-4	PHAVU_008G027000g	8	2263606	2266714		C.cajan_20095	1	9437505	9439588
Vradi04g09570	MQTLLG4-4	PHAVU_008G026800g	8	2256201	2258153		C.cajan_20095	1	9437505	9439588
Vradi04g09580	MQTLLG4-4	PHAVU_008G026500g	8	2239678	2244410		C.cajan_20096	1	9450430	9451793
Vradi04g09590	MQTLLG4-4	PHAVU_008G026400g	8	2226043	2235116		C.cajan_20097	1	9458472	9467289
Vradi04g09600	MQTLLG4-4	PHAVU_008G026300g	8	2223087	2224521		C.cajan_20098	1	9471735	9472946
Vradi04g09610	MQTLLG4-4	PHAVU_008G026100g	8	2216305	2220406		C.cajan_09949	3	19592911	19593570
Vradi04g09620	MQTLLG4-4	PHAVU_008G025900g	8	2209345	2211775		C.cajan_20102	1	9517371	9519341
Vradi04g09630	MQTLLG4-4	PHAVU_008G025700g	8	2181409	2202590
Vradi04g09640	MQTLLG4-4	PHAVU_008G025600g	8	2173175	2176699		C.cajan_20105	1	9566608	9569636
Vradi04g09650	MQTLLG4-4	PHAVU_008G025500g	8	2162578	2166258		C.cajan_20106	1	9579120	9582573
Vradi04g09660	MQTLLG4-4	PHAVU_008G025400g	8	2155317	2160715		C.cajan_20107	1	9584030	9589068
Vradi04g09670	MQTLLG4-4	PHAVU_008G025300g	8	2141431	2145714		C.cajan_20108	1	9602351	9604270
Vradi04g09680	MQTLLG4-4	PHAVU_008G025200g	8	2136230	2140612		C.cajan_20109	1	9606020	9609214
Vradi04g09690	MQTLLG4-4	PHAVU_008G025100g	8	2129995	2131782		C.cajan_20110	1	9616014	9617551
Vradi04g09700	MQTLLG4-4	PHAVU_008G025000g	8	2120186	2122611		C.cajan_20111	1	9625784	9627100
Vradi04g09710	MQTLLG4-4	PHAVU_008G024800g	8	2103270	2107025		C.cajan_20112	1	9634955	9638326
Vradi04g03300	MQTLLG4-6	PHAVU_005G128500g	5	35309354	35312160		C.cajan_25590	KQ483432.1	606226	608845
Vradi04g03310	MQTLLG4-6	PHAVU_005G128400g	5	35293804	35297827		C.cajan_25591	KQ483432.1	611930	615112
Vradi04g03320	MQTLLG4-6	PHAVU_005G128300g	5	35289281	35292659		C.cajan_25592	KQ483432.1	617781	623300
Vradi04g03330	MQTLLG4-6	PHAVU_005G128200g	5	35269732	35284846		C.cajan_32627	KQ483557.1	200449	214063
Vradi04g03340	MQTLLG4-6	PHAVU_005G128100g	5	35261758	35269366		C.cajan_25593	KQ483432.1	626346	633992
Vradi04g03350	MQTLLG4-6	PHAVU_005G128000g	5	35248783	35257949		C.cajan_25595	KQ483432.1	659024	667675
Vradi04g03360	MQTLLG4-6	PHAVU_005G127600g	5	35212603	35216025		C.cajan_25600	KQ483432.1	706122	707910
Vradi04g03370	MQTLLG4-6	PHAVU_005G127500g	5	35206205	35207458		C.cajan_25602	KQ483432.1	714833	716103
Vradi04g03380	MQTLLG4-6	PHAVU_005G127400g	5	35193133	35202138		C.cajan_31922	KQ483521.1	31240	42440
Vradi04g03380	MQTLLG4-6	PHAVU_005G127400g	5	35193133	35202138		C.cajan_31922	KQ483521.1	31240	42440
Vradi04g03390	MQTLLG4-6	PHAVU_005G127300g	5	35182580	35188696		C.cajan_25604	KQ483432.1	733478	739941
Vradi05g04570	MQTLLG5-1						C.cajan_46779	AGCT01060453.1	637	3543
Vradi05g04580	MQTLLG5-1
Vradi05g04590	MQTLLG5-1	PHAVU_009G174800g	9	25387068	25394742	MQTL-YC9.3	C.cajan_08559	3	5245880	5249214
Vradi05g04600	MQTLLG5-1	PHAVU_009G174700g	9	25373898	25374981	MQTL-YC9.3
Vradi05g04610	MQTLLG5-1	PHAVU_009G174600g	9	25356687	25357655	MQTL-YC9.3	C.cajan_08576	3	5380503	5381257
Vradi05g04620	MQTLLG5-1	PHAVU_009G174400g	9	25336514	25340961	MQTL-YC9.3	C.cajan_08578	3	5399105	5403715
Vradi05g04630	MQTLLG5-1	PHAVU_009G174300g	9	25326451	25329523	MQTL-YC9.3	C.cajan_08579	3	5407185	5410191
Vradi05g04640	MQTLLG5-1						C.cajan_08580	3	5411628	5413137
Vradi05g04650	MQTLLG5-1	PHAVU_009G1741000g	9	25311273	25312692	MQTL-YC9.3
Vradi05g04650	MQTLLG5-1	PHAVU_009G1741001g	9	25307939	25308910	MQTL-YC9.3
Vradi05g04660	MQTLLG5-1	PHAVU_009G174000g	9	25293938	25294582	MQTL-YC9.3	C.cajan_08582	3	5425784	5426089
Vradi05g04670	MQTLLG5-1
Vradi05g04680	MQTLLG5-1	PHAVU_009G173300g	9	25225551	25230083	MQTL-YC9.3	C.cajan_08588	3	5477394	5480849
Vradi05g04690	MQTLLG5-1	PHAVU_009G173200g	9	25223149	25224983	MQTL-YC9.3	C.cajan_08589	3	5481261	5482703
Vradi05g04700	MQTLLG5-1	PHAVU_009G173100g	9	25205464	25209436	MQTL-YC9.3	C.cajan_08590	3	5487568	5491395
Vradi05g08460	MQTLLG5-3	PHAVU_009G113400g	9	16977469	16979752		C.cajan_09084	3	10952485	10954400
Vradi05g08470	MQTLLG5-3
Vradi05g08480	MQTLLG5-3	PHAVU_009G113100g	9	16955395	16956625
Vradi05g08490	MQTLLG5-3	PHAVU_009G113000g	9	16950771	16954842		C.cajan_09087	3	10986249	10989737
Vradi05g08500	MQTLLG5-3	PHAVU_009G112800g	9	16917129	16930022		C.cajan_09088	3	11006370	11018863
Vradi05g08510	MQTLLG5-3	PHAVU_009G112700g	9	16902178	16914798		C.cajan_09089	3	11021116	11032569
Vradi05g08520	MQTLLG5-3	PHAVU_009G112600g	9	16852626	16855733
Vradi05g08530	MQTLLG5-3	PHAVU_009G112400g	9	16835063	16837957		C.cajan_09091	3	11064771	11070775
Vradi05g08540	MQTLLG5-3	PHAVU_009G112300g	9	16816556	16822871		C.cajan_09092	3	11075842	11080556
Vradi05g08540	MQTLLG5-3	PHAVU_009G112300g	9	16816556	16822871		C.cajan_09092	3	11075842	11080556
Vradi05g08550	MQTLLG5-3	PHAVU_009G112200g	9	16812824	16816416		C.cajan_09093	3	11082456	11085291
Vradi05g08560	MQTLLG5-3	PHAVU_009G112000g	9	16788827	16792372		C.cajan_09096	3	11105306	11107812
Vradi05g08560	MQTLLG5-3	PHAVU_009G112000g	9	16788827	16792372		C.cajan_09096	3	11105306	11107812
Vradi05g08560	MQTLLG5-3	PHAVU_009G112000g	9	16788827	16792372		C.cajan_09096	3	11105306	11107812
Vradi05g08570	MQTLLG5-3						C.cajan_36466	KQ483691.1	80225	85289
Vradi05g08580	MQTLLG5-3	PHAVU_009G1117000g	9	16773959	16775219		C.cajan_36467	KQ483691.1	90410	99384
Vradi05g08580	MQTLLG5-3	PHAVU_009G1117002g	9	16766099	16770245		C.cajan_36467	KQ483691.1	90410	99384
Vradi05g08580	MQTLLG5-3	PHAVU_009G1117001g	9	16757412	16759385		C.cajan_36467	KQ483691.1	90410	99384
Vradi05g08590	MQTLLG5-3	PHAVU_009G111600g	9	16749106	16754439		C.cajan_36468	KQ483691.1	103658	108843
Vradi05g08600	MQTLLG5-3	PHAVU_009G111500g	9	16740222	16745122		C.cajan_36469	KQ483691.1	110515	115198
Vradi05g08610	MQTLLG5-3	PHAVU_009G111400g	9	16713157	16716775		C.cajan_36471	KQ483691.1	137713	142240
Vradi05g08620	MQTLLG5-3	PHAVU_009G111300g	9	16704229	16709140		C.cajan_36472	KQ483691.1	158866	163478
Vradi05g08620	MQTLLG5-3	PHAVU_009G111300g	9	16704229	16709140		C.cajan_36472	KQ483691.1	158866	163478
Vradi05g08630	MQTLLG5-3	PHAVU_009G111200g	9	16682755	16683615		C.cajan_36473	KQ483691.1	172027	172524
Vradi05g08640	MQTLLG5-3	PHAVU_009G110900g	9	16668515	16672173		C.cajan_36477	KQ483691.1	213710	217644
Vradi05g08650	MQTLLG5-3	PHAVU_009G110700g	9	16637685	16638730		C.cajan_36479	KQ483691.1	246455	246922
Vradi05g08660	MQTLLG5-3	PHAVU_009G110600g	9	16615898	16620071		C.cajan_36480	KQ483691.1	260034	263325
Vradi05g08670	MQTLLG5-3
Vradi05g08680	MQTLLG5-3	PHAVU_009G110400g	9	16562049	16563647		C.cajan_11039	6	198910	199901
Vradi05g08690	MQTLLG5-3
Vradi05g08700	MQTLLG5-3	PHAVU_009G110200g	9	16547797	16550787		C.cajan_11041	6	212576	214930
Vradi05g08710	MQTLLG5-3
Vradi05g08720	MQTLLG5-3	PHAVU_009G110000g	9	16531500	16535386		C.cajan_11043	6	231431	234301
Vradi05g08730	MQTLLG5-3	PHAVU_009G109900g	9	16525561	16530712		C.cajan_11044	6	235941	240948
Vradi05g08740	MQTLLG5-3	PHAVU_009G109900g	9	16525561	16530712		C.cajan_11044	6	235941	240948
Vradi05g06870	MQTLLG5-4	PHAVU_009G122700g	9	18210950	18212455	MQTL-YC9.3	C.cajan_01355	11	14538821	14540260
Vradi05g06880	MQTLLG5-4
Vradi05g06890	MQTLLG5-4	PHAVU_009G122600g	9	18196495	18199074	MQTL-YC9.3	C.cajan_01359	11	14580715	14583288
Vradi05g06900	MQTLLG5-4	PHAVU_001G222200g	1	48459136	48461953		C.cajan_10639	3	26301143	26302468
Vradi05g06910	MQTLLG5-4	PHAVU_009G122500g	9	18193534	18195858	MQTL-YC9.3
Vradi05g06920	MQTLLG5-4	PHAVU_009G122400g	9	18187676	18190724	MQTL-YC9.3	C.cajan_01361	11	14594699	14597768
Vradi05g06930	MQTLLG5-4
Vradi05g06940	MQTLLG5-4
Vradi05g06950	MQTLLG5-4
Vradi05g06960	MQTLLG5-4	PHAVU_009G122300g	9	18181490	18182507	MQTL-YC9.3	C.cajan_01363	11	14611001	14611501
Vradi05g06970	MQTLLG5-4	PHAVU_009G122200g	9	18154882	18157737	MQTL-YC9.3	C.cajan_40937	KQ484195.1	71896	74539
Vradi05g06980	MQTLLG5-4	PHAVU_009G121900g	9	18131150	18134369	MQTL-YC9.3	C.cajan_40938	KQ484195.1	80319	82719
Vradi05g06990	MQTLLG5-4						C.cajan_40939	KQ484195.1	86643	88145
Vradi05g07000	MQTLLG5-4	PHAVU_009G121700g	9	18121508	18123587	MQTL-YC9.3	C.cajan_40940	KQ484195.1	92952	94585
Vradi05g07010	MQTLLG5-4	PHAVU_009G121600g	9	18106451	18110229	MQTL-YC9.3	C.cajan_40941	KQ484195.1	101178	106050
Vradi05g12310	MQTLLG5-5
Vradi05g12320	MQTLLG5-5	PHAVU_009G070500g	9	11822715	11825652		C.cajan_09371	3	13591824	13594136
Vradi05g12330	MQTLLG5-5	PHAVU_009G070400g	9	11819711	11822008		C.cajan_09372	3	13595462	13597657
Vradi05g12340	MQTLLG5-5	PHAVU_009G070300g	9	11815026	11817723		C.cajan_09442	3	14337285	14338801
Vradi05g12350	MQTLLG5-5	PHAVU_009G070200g	9	11805527	11810729		C.cajan_08344	3	3066110	3066833
Vradi05g12360	MQTLLG5-5	PHAVU_009G070100g	9	11800339	11802037		C.cajan_09440	3	14320122	14321222
Vradi05g12370	MQTLLG5-5	PHAVU_009G070000g	9	11781540	11784237		C.cajan_09428	3	14129435	14131700
Vradi05g12380	MQTLLG5-5	PHAVU_009G069800g	9	11765704	11768812
Vradi05g12390	MQTLLG5-5	PHAVU_009G069700g	9	11751008	11755078		C.cajan_09421	3	14090772	14093942
Vradi05g12400	MQTLLG5-5	PHAVU_009G069600g	9	11741677	11744529		C.cajan_09418	3	14066917	14069534
Vradi05g12410	MQTLLG5-5	PHAVU_009G069200g	9	11709938	11712693		C.cajan_41393	KQ483990.1	136417	139118
Vradi05g12420	MQTLLG5-5	PHAVU_009G069100g	9	11706505	11709065		C.cajan_09415	3	14043364	14044957
Vradi05g12430	MQTLLG5-5	PHAVU_009G068900g	9	11696228	11698237		C.cajan_09415	3	14043364	14044957
Vradi05g12430	MQTLLG5-5	PHAVU_009G068900g	9	11696228	11698237		C.cajan_09415	3	14043364	14044957
Vradi05g12440	MQTLLG5-5	PHAVU_009G068800g	9	11684649	11693638		C.cajan_09412	3	14025240	14032892
Vradi05g12450	MQTLLG5-5
Vradi05g12460	MQTLLG5-5	PHAVU_009G068600g	9	11673770	11674148
Vradi05g12470	MQTLLG5-5	PHAVU_009G068400g	9	11653910	11658816		C.cajan_09405	3	13978930	13983401
Vradi05g12480	MQTLLG5-5
Vradi05g12490	MQTLLG5-5	PHAVU_009G068000g	9	11618726	11620806		C.cajan_39372	KQ483671.1	268992	269483
Vradi05g12500	MQTLLG5-5	PHAVU_009G067900g	9	11605319	11607628		C.cajan_35257	KQ483723.1	3343	5691
Vradi05g12510	MQTLLG5-5	PHAVU_009G067800g	9	11594789	11597022		C.cajan_35258	KQ483723.1	20943	22113
Vradi05g12520	MQTLLG5-5	PHAVU_009G067600g	9	11553719	11555872		C.cajan_35260	KQ483723.1	86034	87369
Vradi05g12530	MQTLLG5-5	PHAVU_009G067500g	9	11531078	11536621		C.cajan_35267	KQ483723.1	121692	122305
Vradi05g12540	MQTLLG5-5
Vradi05g12550	MQTLLG5-5	PHAVU_009G067400g	9	11525144	11527754		C.cajan_35268	KQ483723.1	126476	128192
Vradi05g12560	MQTLLG5-5	PHAVU_009G067300g	9	11521263	11523831		C.cajan_35269	KQ483723.1	129676	139663
Vradi05g12570	MQTLLG5-5	PHAVU_009G067200g	9	11506912	11510666		C.cajan_35271	KQ483723.1	147047	151439
Vradi05g12580	MQTLLG5-5	PHAVU_009G067100g	9	11487957	11499576		C.cajan_35272	KQ483723.1	155861	166619
Vradi05g12580	MQTLLG5-5	PHAVU_009G067100g	9	11487957	11499576		C.cajan_35272	KQ483723.1	155861	166619
Vradi05g12590	MQTLLG5-5	PHAVU_009G067000g	9	11458849	11461556		C.cajan_35274	KQ483723.1	193287	194234
Vradi05g15720	MQTLLG5-6	PHAVU_009G118000g	9	17583621	17588370
Vradi05g15730	MQTLLG5-6	PHAVU_009G117900g	9	17576917	17582488		C.cajan_23778	KQ483412.1	735798	741075
Vradi05g15740	MQTLLG5-6	PHAVU_009G117800g	9	17567058	17576084
Vradi05g15750	MQTLLG5-6	PHAVU_009G117700g	9	17560293	17561777		C.cajan_23780	KQ483412.1	753611	754434
Vradi05g15760	MQTLLG5-6	PHAVU_009G117600g	9	17558170	17559656		C.cajan_23781	KQ483412.1	755820	757399
Vradi05g15770	MQTLLG5-6	PHAVU_009G117500g	9	17541857	17548419		C.cajan_23782	KQ483412.1	764989	766257
Vradi05g15780	MQTLLG5-6	PHAVU_009G117300g	9	17531173	17535831		C.cajan_23783	KQ483412.1	767853	771150
Vradi05g15790	MQTLLG5-6	PHAVU_009G117100g	9	17513492	17525935		C.cajan_23785	KQ483412.1	788597	796909
Vradi05g15800	MQTLLG5-6	PHAVU_009G117000g	9	17509981	17512357		C.cajan_33933	KQ483625.1	321702	322276
Vradi05g15810	MQTLLG5-6	PHAVU_009G116900g	9	17501462	17507558		C.cajan_33932	KQ483625.1	310301	315207
Vradi05g15820	MQTLLG5-6	PHAVU_008G276900g	8	58513362	58514867		C.cajan_40621	KQ484104.1	69158	70168
Vradi05g15830	MQTLLG5-6	PHAVU_009G116700g	9	17485614	17486785		C.cajan_33931	KQ483625.1	303975	304925
Vradi05g15830	MQTLLG5-6	PHAVU_009G1165000g	9	17433812	17434313		C.cajan_33931	KQ483625.1	303975	304925
Vradi05g15830	MQTLLG5-6	PHAVU_009G1165001g	9	17433306	17433667		C.cajan_33931	KQ483625.1	303975	304925
Vradi05g15830	MQTLLG5-6	PHAVU_009G116300g	9	17415736	17416557		C.cajan_33931	KQ483625.1	303975	304925
Vradi05g15830	MQTLLG5-6	PHAVU_009G116600g	9	17449427	17450654		C.cajan_33931	KQ483625.1	303975	304925
Vradi05g15840	MQTLLG5-6	PHAVU_009G116200g	9	17407351	17411972		C.cajan_33930	KQ483625.1	297775	302554
Vradi05g15850	MQTLLG5-6	PHAVU_009G116100g	9	17398629	17403843		C.cajan_33928	KQ483625.1	281271	285722
Vradi05g15850	MQTLLG5-6	PHAVU_009G116100g	9	17398629	17403843		C.cajan_33928	KQ483625.1	281271	285722
Vradi05g15860	MQTLLG5-6
Vradi05g15870	MQTLLG5-6	PHAVU_009G115900g	9	17387503	17390389		C.cajan_33926	KQ483625.1	270475	272520
Vradi05g15880	MQTLLG5-6	PHAVU_001G138600g	1	38622966	38625891	MQTL-YC1.4	C.cajan_09523	3	15372373	15374551
Vradi05g15890	MQTLLG5-6	PHAVU_009G115800g	9	17341245	17344727		C.cajan_33924	KQ483625.1	224900	227368
Vradi05g15900	MQTLLG5-6	PHAVU_009G115700g	9	17337122	17340657		C.cajan_33923	KQ483625.1	207687	210031
Vradi05g15910	MQTLLG5-6	PHAVU_009G115600g	9	17312479	17335772		C.cajan_33919	KQ483625.1	167002	196768
Vradi05g15920	MQTLLG5-6	PHAVU_009G115600g	9	17312479	17335772		C.cajan_33919	KQ483625.1	167002	196768
Vradi05g15930	MQTLLG5-6	PHAVU_009G115500g	9	17298710	17304455		C.cajan_33918	KQ483625.1	157179	162416
Vradi05g15940	MQTLLG5-6	PHAVU_009G115300g	9	17283966	17295362		C.cajan_33915	KQ483625.1	122006	132602
Vradi05g15950	MQTLLG5-6
Vradi05g15960	MQTLLG5-6	PHAVU_005G082300g	5	19731357	19741670		C.cajan_26227	KQ483455.1	54479	71748
Vradi05g15970	MQTLLG5-6	PHAVU_005G082000g	5	19478759	19481895
Vradi05g15980	MQTLLG5-6	PHAVU_005G185800g	5	40582566	40585407		C.cajan_26222	KQ483455.1	14487	16350
Vradi05g15990	MQTLLG5-6	PHAVU_005G185600g	5	40569446	40573395		C.cajan_26233	KQ483455.1	104053	108694
Vradi05g16000	MQTLLG5-6	PHAVU_005G185500g	5	40547952	40567221		C.cajan_26234	KQ483455.1	111092	129572
Vradi05g16010	MQTLLG5-6	PHAVU_005G185400g	5	40534273	40544634		C.cajan_26235	KQ483455.1	137623	148868
Vradi05g16020	MQTLLG5-6	PHAVU_005G185300g	5	40529322	40532512		C.cajan_26236	KQ483455.1	151742	153685
Vradi05g16030	MQTLLG5-6
Vradi05g16040	MQTLLG5-6	PHAVU_005G185100g	5	40520367	40525832		C.cajan_26238	KQ483455.1	164410	170419
Vradi05g16050	MQTLLG5-6	PHAVU_005G185000g	5	40516413	40520210		C.cajan_26239	KQ483455.1	185357	189180
Vradi05g16060	MQTLLG5-6	PHAVU_002G1737001g	2	32309530	32310209	MQTL-YC2.5	C.cajan_24281	KQ483418.1	456862	457137
Vradi05g16060	MQTLLG5-6	PHAVU_002G1737001g	2	32309530	32310209	MQTL-YC2.5	C.cajan_07923	2	36018872	36019147
Vradi05g16070	MQTLLG5-6	PHAVU_005G184800g	5	40500228	40504145		C.cajan_26244	KQ483455.1	233269	236571
Vradi05g16080	MQTLLG5-6	PHAVU_005G184700g	5	40494047	40497958		C.cajan_02942	11	32459368	32463450
Vradi05g16090	MQTLLG5-6						C.cajan_26250	KQ483455.1	284867	287522
Vradi05g16100	MQTLLG5-6	PHAVU_005G184600g	5	40482698	40492173		C.cajan_26251	KQ483455.1	290417	298174
Vradi05g16110	MQTLLG5-6	PHAVU_005G184300g	5	40471368	40476766		C.cajan_26254	KQ483455.1	312469	318717
Vradi05g16120	MQTLLG5-6	PHAVU_005G184000g	5	40454850	40460241
Vradi05g16130	MQTLLG5-6	PHAVU_009G238000g	9	35052591	35057925		C.cajan_43754	KQ484270.1	68166	75397
Vradi05g16140	MQTLLG5-6	PHAVU_005G183800g	5	40446964	40449466		C.cajan_26258	KQ483455.1	351151	352772
Vradi05g16150	MQTLLG5-6						C.cajan_32131	KQ483629.1	273647	278837
Vradi05g16160	MQTLLG5-6	PHAVU_005G183500g	5	40432734	40436797		C.cajan_26262	KQ483455.1	382935	386595
Vradi05g16170	MQTLLG5-6	PHAVU_005G183300g	5	40424702	40428374		C.cajan_26264	KQ483455.1	399647	402866
Vradi05g16180	MQTLLG5-6	PHAVU_005G098200g	5	29327854	29328102
Vradi05g16180	MQTLLG5-6	PHAVU_005G098400g	5	29708872	29709663
Vradi05g16190	MQTLLG5-6	PHAVU_005G182000g	5	40351735	40357838		C.cajan_26279	KQ483455.1	560792	565981
Vradi05g16200	MQTLLG5-6	PHAVU_005G182100g	5	40358576	40361465		C.cajan_26280	KQ483455.1	567767	570354
Vradi05g16210	MQTLLG5-6	PHAVU_005G182200g	5	40363221	40365195
Vradi05g16220	MQTLLG5-6
Vradi05g16230	MQTLLG5-6	PHAVU_005G182700g	5	40394147	40396631		C.cajan_26271	KQ483455.1	450232	451840
Vradi05g16240	MQTLLG5-6	PHAVU_005G182900g	5	40403232	40405945		C.cajan_26268	KQ483455.1	432704	434830
Vradi05g16250	MQTLLG5-6	PHAVU_005G183000g	5	40407454	40410164		C.cajan_26267	KQ483455.1	427601	429369
Vradi05g16260	MQTLLG5-6	PHAVU_005G183100g	5	40412782	40416941		C.cajan_26266	KQ483455.1	422765	426143
Vradi05g16270	MQTLLG5-6
Vradi05g16280	MQTLLG5-6
Vradi05g16290	MQTLLG5-6	PHAVU_005G181700g	5	40315095	40317708		C.cajan_26274	KQ483455.1	503638	506271
Vradi05g16300	MQTLLG5-6	PHAVU_005G181600g	5	40308424	40312332		C.cajan_02950	11	32494060	32498286
Vradi05g16310	MQTLLG5-6	PHAVU_005G181500g	5	40303954	40307201		C.cajan_02948	11	32486864	32489382
Vradi05g16320	MQTLLG5-6	PHAVU_005G181400g	5	40301041	40302783		C.cajan_02946	11	32476902	32478887
Vradi05g16330	MQTLLG5-6						C.cajan_37903	KQ484053.1	113722	115085
Vradi05g16340	MQTLLG5-6	PHAVU_005G181200g	5	40283513	40285578		C.cajan_37902	KQ484053.1	97932	99191
Vradi05g16350	MQTLLG5-6	PHAVU_005G181100g	5	40276793	40281727		C.cajan_37901	KQ484053.1	90551	94437
Vradi05g16360	MQTLLG5-6	PHAVU_005G181000g	5	40269074	40272702		C.cajan_37900	KQ484053.1	80968	84126
Vradi05g16370	MQTLLG5-6	PHAVU_005G180800g	5	40265154	40266748		C.cajan_37898	KQ484053.1	75998	77388
Vradi05g16380	MQTLLG5-6	PHAVU_005G180900g	5	40266774	40267502		C.cajan_37899	KQ484053.1	77445	78173
Vradi05g16390	MQTLLG5-6	PHAVU_005G180600g	5	40253016	40253942
Vradi05g16400	MQTLLG5-6	PHAVU_005G180500g	5	40245190	40246385		C.cajan_37895	KQ484053.1	45132	45902
Vradi05g16410	MQTLLG5-6	PHAVU_005G180400g	5	40227955	40238883		C.cajan_24692	KQ483417.1	640375	647264
Vradi05g16410	MQTLLG5-6	PHAVU_005G180400g	5	40227955	40238883		C.cajan_36526	KQ483818.1	89911	91477
Vradi05g16410	MQTLLG5-6	PHAVU_005G180400g	5	40227955	40238883		C.cajan_24692	KQ483417.1	640375	647264
Vradi05g16410	MQTLLG5-6	PHAVU_005G180400g	5	40227955	40238883		C.cajan_36526	KQ483818.1	89911	91477
Vradi05g16420	MQTLLG5-6	PHAVU_005G180200g	5	40208002	40220520		C.cajan_02953	11	32513281	32522819
Vradi05g16430	MQTLLG5-6	PHAVU_005G180100g	5	40191119	40200106		C.cajan_02959	11	32574774	32582450
Vradi05g16430	MQTLLG5-6	PHAVU_005G180100g	5	40191119	40200106		C.cajan_02973	11	32701276	32704660
Vradi05g16430	MQTLLG5-6	PHAVU_005G180100g	5	40191119	40200106		C.cajan_02959	11	32574774	32582450
Vradi05g16430	MQTLLG5-6	PHAVU_005G180100g	5	40191119	40200106		C.cajan_02973	11	32701276	32704660
Vradi05g16440	MQTLLG5-6	PHAVU_005G180000g	5	40176282	40178775		C.cajan_02958	11	32544805	32546868
Vradi05g16450	MQTLLG5-6	PHAVU_005G174400g	5	39803242	39807869		C.cajan_14590	10	14314915	14318671
Vradi05g16460	MQTLLG5-6	PHAVU_005G179800g	5	40165242	40165850		C.cajan_02956	11	32533532	32534355
Vradi05g16470	MQTLLG5-6	PHAVU_005G179700g	5	40162915	40165171		C.cajan_02955	11	32528610	32531322
Vradi05g16480	MQTLLG5-6	PHAVU_005G176800g	5	39986948	39988628		C.cajan_14621	10	14503781	14504990
Vradi05g16490	MQTLLG5-6	PHAVU_005G176900g	5	39989177	39992710
Vradi05g16500	MQTLLG5-6	PHAVU_005G177000g	5	39993433	39997391		C.cajan_14622	10	14506491	14511375
Vradi05g16510	MQTLLG5-6	PHAVU_005G177300g	5	40017084	40022311		C.cajan_02984	11	32792818	32795071
Vradi05g16520	MQTLLG5-6	PHAVU_005G177500g	5	40027607	40032303		C.cajan_02982	11	32775378	32780503
Vradi05g16530	MQTLLG5-6	PHAVU_005G177600g	5	40038345	40041620
Vradi05g16540	MQTLLG5-6	PHAVU_005G177700g	5	40043780	40044336
Vradi05g22420	MQTLLG5-7	PHAVU_005G116100g	5	33558704	33562110		C.cajan_32978	KQ483660.1	289381	292503
Vradi05g22430	MQTLLG5-7	PHAVU_005G116000g	5	33530600	33533721		C.cajan_35299	KQ483652.1	8126	11141
Vradi05g22440	MQTLLG5-7						C.cajan_35300	KQ483652.1	16964	20585
Vradi05g22450	MQTLLG5-7	PHAVU_005G115900g	5	33511213	33512412		C.cajan_35302	KQ483652.1	30839	32023
Vradi05g22460	MQTLLG5-7	PHAVU_005G115800g	5	33506803	33509069		C.cajan_35303	KQ483652.1	34318	35787
Vradi05g22470	MQTLLG5-7	PHAVU_005G115700g	5	33498352	33505304		C.cajan_35304	KQ483652.1	37046	43951
Vradi05g22480	MQTLLG5-7	PHAVU_007G155200g	7	37912849	37914838	MQTL-YC7.5	C.cajan_33223	KQ483697.1	76430	78366
Vradi05g22480	MQTLLG5-7	PHAVU_007G155100g	7	37899404	37901381	MQTL-YC7.5	C.cajan_33223	KQ483697.1	76430	78366
Vradi05g22490	MQTLLG5-7						C.cajan_35306	KQ483652.1	58174	59208
Vradi05g22500	MQTLLG5-7
Vradi05g22510	MQTLLG5-7	PHAVU_005G115500g	5	33409882	33413659		C.cajan_35310	KQ483652.1	144053	147944
Vradi05g22520	MQTLLG5-7						C.cajan_35312	KQ483652.1	176699	178187
Vradi05g22530	MQTLLG5-7	PHAVU_005G115300g	5	33339177	33343486		C.cajan_35314	KQ483652.1	197359	200959
Vradi05g22530	MQTLLG5-7	PHAVU_008G133000g	8	20842034	20845032	MQTL-YC8.3	C.cajan_35314	KQ483652.1	197359	200959
Vradi05g22540	MQTLLG5-7	PHAVU_005G115200g	5	33308307	33309113		C.cajan_35315	KQ483652.1	222799	223158
Vradi05g22550	MQTLLG5-7	PHAVU_005G115100g	5	33284369	33293363		C.cajan_35316	KQ483652.1	235769	244950
Vradi05g22560	MQTLLG5-7	PHAVU_005G115000g	5	33257215	33261962		C.cajan_35318	KQ483652.1	255174	262956
Vradi05g22570	MQTLLG5-7	PHAVU_007G009000g	7	632633	637198		C.cajan_07916	2	35956547	35962623
Vradi05g22580	MQTLLG5-7
Vradi05g22590	MQTLLG5-7	PHAVU_005G115000g	5	33257215	33261962		C.cajan_35318	KQ483652.1	255174	262956
Vradi05g22600	MQTLLG5-7	PHAVU_005G115000g	5	33257215	33261962		C.cajan_35318	KQ483652.1	255174	262956
Vradi05g22610	MQTLLG5-7	PHAVU_005G114800g	5	33238941	33244051		C.cajan_35319	KQ483652.1	293365	298333
Vradi05g22620	MQTLLG5-7	PHAVU_005G114600g	5	33211635	33217466		C.cajan_13736	10	4066635	4072028
Vradi05g22630	MQTLLG5-7	PHAVU_005G114400g	5	33171314	33172499		C.cajan_13743	10	4142603	4143435
Vradi05g22640	MQTLLG5-7	PHAVU_005G114300g	5	33141831	33142391		C.cajan_13744	10	4153773	4154141
Vradi05g22640	MQTLLG5-7	PHAVU_005G114300g	5	33141831	33142391		C.cajan_48577	KQ486988.1	2842	3402
Vradi05g22640	MQTLLG5-7	PHAVU_005G114300g	5	33141831	33142391		C.cajan_13745	10	4165614	4166177
Vradi05g22650	MQTLLG5-7	PHAVU_005G114200g	5	33088052	33095292		C.cajan_13746	10	4171796	4174603
Vradi05g22650	MQTLLG5-7	PHAVU_005G114200g	5	33088052	33095292		C.cajan_13746	10	4171796	4174603
Vradi05g22660	MQTLLG5-7
Vradi05g22670	MQTLLG5-7	PHAVU_005G114100g	5	33083164	33084566		C.cajan_36566	KQ484021.1	114694	115452
Vradi05g22680	MQTLLG5-7
Vradi05g22690	MQTLLG5-7	PHAVU_005G114000g	5	33067760	33070552		C.cajan_36565	KQ484021.1	103765	105255
Vradi05g22700	MQTLLG5-7	PHAVU_005G113900g	5	33060060	33060809		C.cajan_36564	KQ484021.1	100384	101133
Vradi06g05970	MQTLLG6-1	PHAVU_008G241300g	8	55557595	55562802
Vradi06g05980	MQTLLG6-1	PHAVU_008G241400g	8	55565726	55569529		C.cajan_29429	KQ483502.1	262835	266323
Vradi06g05990	MQTLLG6-1	PHAVU_008G241500g	8	55576664	55581911		C.cajan_29431	KQ483502.1	277537	282128
Vradi06g06000	MQTLLG6-1	PHAVU_008G241700g	8	55593191	55599344
Vradi06g06010	MQTLLG6-1	PHAVU_008G241800g	8	55600910	55602918		C.cajan_29435	KQ483502.1	332191	333054
Vradi06g06020	MQTLLG6-1
Vradi06g06030	MQTLLG6-1	PHAVU_008G242000g	8	55615323	55619236		C.cajan_29438	KQ483502.1	359626	363937
Vradi06g06040	MQTLLG6-1	PHAVU_008G242100g	8	55620359	55623931		C.cajan_29439	KQ483502.1	377018	380964
Vradi06g06050	MQTLLG6-1	PHAVU_008G242200g	8	55627709	55631495
Vradi06g06060	MQTLLG6-1	PHAVU_008G242400g	8	55661856	55672857
Vradi06g06070	MQTLLG6-1	PHAVU_008G242500g	8	55673702	55676549		C.cajan_29442	KQ483502.1	443262	446053
Vradi06g06080	MQTLLG6-1	PHAVU_008G242600g	8	55681687	55683768		C.cajan_10535	3	25193201	25194826
Vradi06g06080	MQTLLG6-1	PHAVU_008G242600g	8	55681687	55683768		C.cajan_48383	KQ486152.1	2476	4107
Vradi06g06080	MQTLLG6-1	PHAVU_008G242600g	8	55681687	55683768		C.cajan_29443	KQ483502.1	447988	449679
Vradi06g06090	MQTLLG6-1	PHAVU_008G242700g	8	55691088	55693390		C.cajan_10531	3	25140898	25141359
Vradi06g06090	MQTLLG6-1	PHAVU_008G242700g	8	55691088	55693390		C.cajan_10534	3	25184152	25185819
Vradi06g06100	MQTLLG6-1	PHAVU_008G242800g	8	55700018	55708330		C.cajan_10533	3	25150505	25159257
Vradi06g06110	MQTLLG6-1	PHAVU_008G243000g	8	55712693	55715294		C.cajan_10529	3	25118240	25120774
Vradi06g06120	MQTLLG6-1	PHAVU_008G243100g	8	55718645	55719810		C.cajan_10528	3	25113284	25113982
Vradi06g06130	MQTLLG6-1	PHAVU_008G243200g	8	55721059	55723980		C.cajan_10527	3	25104850	25107400
Vradi06g06140	MQTLLG6-1	PHAVU_008G243300g	8	55730601	55733793		C.cajan_10525	3	25078918	25081146
Vradi06g06140	MQTLLG6-1	PHAVU_008G243300g	8	55730601	55733793		C.cajan_10525	3	25078918	25081146
Vradi06g06150	MQTLLG6-1	PHAVU_008G243400g	8	55734814	55737932
Vradi06g06150	MQTLLG6-1	PHAVU_008G243400g	8	55734814	55737932
Vradi06g06160	MQTLLG6-1	PHAVU_008G243500g	8	55739438	55741857		C.cajan_38403	KQ483968.1	44033	46833
Vradi06g06170	MQTLLG6-1	PHAVU_002G315200g	2	47584425	47587870		C.cajan_15636	8	2869766	2872800	CC_MQTL8.3
Vradi06g06180	MQTLLG6-1	PHAVU_008G243600g	8	55744406	55751780		C.cajan_10523	3	25058231	25064558
Vradi06g06190	MQTLLG6-1	PHAVU_008G243800g	8	55767591	55790702		C.cajan_36313	KQ483669.1	195803	215216
Vradi06g06200	MQTLLG6-1	PHAVU_008G243900g	8	55814158	55815239
Vradi06g06210	MQTLLG6-1	PHAVU_008G244000g	8	55819378	55823465		C.cajan_36310	KQ483669.1	130236	133667
Vradi06g06220	MQTLLG6-1	PHAVU_008G244200g	8	55832423	55836148		C.cajan_36308	KQ483669.1	113695	117723
Vradi06g06230	MQTLLG6-1						C.cajan_36306	KQ483669.1	99149	104480
Vradi06g06240	MQTLLG6-1	PHAVU_008G244400g	8	55846435	55858369
Vradi06g06240	MQTLLG6-1	PHAVU_008G244400g	8	55846435	55858369
Vradi06g06250	MQTLLG6-1	PHAVU_008G245100g	8	55941610	55946157		C.cajan_36306	KQ483669.1	99149	104480
Vradi06g06250	MQTLLG6-1	PHAVU_008G245200g	8	55962918	55970590		C.cajan_36306	KQ483669.1	99149	104480
Vradi06g06250	MQTLLG6-1	PHAVU_008G244900g	8	55914578	55919238		C.cajan_36306	KQ483669.1	99149	104480
Vradi06g06250	MQTLLG6-1	PHAVU_008G244500g	8	55866539	55872135		C.cajan_36306	KQ483669.1	99149	104480
Vradi06g06250	MQTLLG6-1	PHAVU_008G247200g	8	56171768	56177165		C.cajan_36306	KQ483669.1	99149	104480
Vradi06g06250	MQTLLG6-1	PHAVU_008G246500g	8	56117566	56123218		C.cajan_36306	KQ483669.1	99149	104480
Vradi06g06250	MQTLLG6-1	PHAVU_008G2468000g	8	56140136	56142031		C.cajan_36306	KQ483669.1	99149	104480
Vradi06g06250	MQTLLG6-1	PHAVU_008G247300g	8	56183153	56188552		C.cajan_36306	KQ483669.1	99149	104480
Vradi06g06250	MQTLLG6-1	PHAVU_008G247000g	8	56150081	56155745		C.cajan_36306	KQ483669.1	99149	104480
Vradi06g06260	MQTLLG6-1
Vradi06g06270	MQTLLG6-1	PHAVU_008G245100g	8	55941610	55946157		C.cajan_36306	KQ483669.1	99149	104480
Vradi06g06270	MQTLLG6-1	PHAVU_008G245200g	8	55962918	55970590		C.cajan_36306	KQ483669.1	99149	104480
Vradi06g06270	MQTLLG6-1	PHAVU_008G244900g	8	55914578	55919238		C.cajan_36306	KQ483669.1	99149	104480
Vradi06g06270	MQTLLG6-1	PHAVU_008G244500g	8	55866539	55872135		C.cajan_36306	KQ483669.1	99149	104480
Vradi06g06270	MQTLLG6-1	PHAVU_008G247200g	8	56171768	56177165		C.cajan_36306	KQ483669.1	99149	104480
Vradi06g06270	MQTLLG6-1	PHAVU_008G246500g	8	56117566	56123218		C.cajan_36306	KQ483669.1	99149	104480
Vradi06g06270	MQTLLG6-1	PHAVU_008G2468000g	8	56140136	56142031		C.cajan_36306	KQ483669.1	99149	104480
Vradi06g06270	MQTLLG6-1	PHAVU_008G247300g	8	56183153	56188552		C.cajan_36306	KQ483669.1	99149	104480
Vradi06g06270	MQTLLG6-1	PHAVU_008G247000g	8	56150081	56155745		C.cajan_36306	KQ483669.1	99149	104480
Vradi06g06280	MQTLLG6-1	PHAVU_008G245600g	8	56004632	56015286		C.cajan_36305	KQ483669.1	75857	90538
Vradi06g06280	MQTLLG6-1	PHAVU_008G245600g	8	56004632	56015286		C.cajan_05439	2	10071340	10074098
Vradi06g06280	MQTLLG6-1	PHAVU_008G245300g	8	55970838	55973409		C.cajan_36305	KQ483669.1	75857	90538
Vradi06g06280	MQTLLG6-1	PHAVU_008G245300g	8	55970838	55973409		C.cajan_05439	2	10071340	10074098
Vradi06g06280	MQTLLG6-1	PHAVU_008G2448001g	8	55899523	55901821		C.cajan_36305	KQ483669.1	75857	90538
Vradi06g06280	MQTLLG6-1	PHAVU_008G2448001g	8	55899523	55901821		C.cajan_05439	2	10071340	10074098
Vradi06g06280	MQTLLG6-1	PHAVU_008G244600g	8	55873152	55877126		C.cajan_36305	KQ483669.1	75857	90538
Vradi06g06280	MQTLLG6-1	PHAVU_008G244600g	8	55873152	55877126		C.cajan_05439	2	10071340	10074098
Vradi06g06280	MQTLLG6-1	PHAVU_008G245000g	8	55920187	55928747		C.cajan_36305	KQ483669.1	75857	90538
Vradi06g06280	MQTLLG6-1	PHAVU_008G245000g	8	55920187	55928747		C.cajan_05439	2	10071340	10074098
Vradi06g06280	MQTLLG6-1	PHAVU_008G2448000g	8	55902337	55902567		C.cajan_36305	KQ483669.1	75857	90538
Vradi06g06280	MQTLLG6-1	PHAVU_008G2448000g	8	55902337	55902567		C.cajan_05439	2	10071340	10074098
Vradi06g06290	MQTLLG6-1	PHAVU_008G245100g	8	55941610	55946157		C.cajan_36306	KQ483669.1	99149	104480
Vradi06g06290	MQTLLG6-1	PHAVU_008G245200g	8	55962918	55970590		C.cajan_36306	KQ483669.1	99149	104480
Vradi06g06290	MQTLLG6-1	PHAVU_008G244900g	8	55914578	55919238		C.cajan_36306	KQ483669.1	99149	104480
Vradi06g06290	MQTLLG6-1	PHAVU_008G244500g	8	55866539	55872135		C.cajan_36306	KQ483669.1	99149	104480
Vradi06g06290	MQTLLG6-1	PHAVU_008G247200g	8	56171768	56177165		C.cajan_36306	KQ483669.1	99149	104480
Vradi06g06290	MQTLLG6-1	PHAVU_008G246500g	8	56117566	56123218		C.cajan_36306	KQ483669.1	99149	104480
Vradi06g06290	MQTLLG6-1	PHAVU_008G2468000g	8	56140136	56142031		C.cajan_36306	KQ483669.1	99149	104480
Vradi06g06290	MQTLLG6-1	PHAVU_008G247300g	8	56183153	56188552		C.cajan_36306	KQ483669.1	99149	104480
Vradi06g06290	MQTLLG6-1	PHAVU_008G247000g	8	56150081	56155745		C.cajan_36306	KQ483669.1	99149	104480
Vradi06g06300	MQTLLG6-1	PHAVU_008G245600g	8	56004632	56015286		C.cajan_36305	KQ483669.1	75857	90538
Vradi06g06300	MQTLLG6-1	PHAVU_008G245600g	8	56004632	56015286		C.cajan_05439	2	10071340	10074098
Vradi06g06300	MQTLLG6-1	PHAVU_008G245300g	8	55970838	55973409		C.cajan_36305	KQ483669.1	75857	90538
Vradi06g06300	MQTLLG6-1	PHAVU_008G245300g	8	55970838	55973409		C.cajan_05439	2	10071340	10074098
Vradi06g06300	MQTLLG6-1	PHAVU_008G2448001g	8	55899523	55901821		C.cajan_36305	KQ483669.1	75857	90538
Vradi06g06300	MQTLLG6-1	PHAVU_008G2448001g	8	55899523	55901821		C.cajan_05439	2	10071340	10074098
Vradi06g06300	MQTLLG6-1	PHAVU_008G244600g	8	55873152	55877126		C.cajan_36305	KQ483669.1	75857	90538
Vradi06g06300	MQTLLG6-1	PHAVU_008G244600g	8	55873152	55877126		C.cajan_05439	2	10071340	10074098
Vradi06g06300	MQTLLG6-1	PHAVU_008G245000g	8	55920187	55928747		C.cajan_36305	KQ483669.1	75857	90538
Vradi06g06300	MQTLLG6-1	PHAVU_008G245000g	8	55920187	55928747		C.cajan_05439	2	10071340	10074098
Vradi06g06300	MQTLLG6-1	PHAVU_008G2448000g	8	55902337	55902567		C.cajan_36305	KQ483669.1	75857	90538
Vradi06g06300	MQTLLG6-1	PHAVU_008G2448000g	8	55902337	55902567		C.cajan_05439	2	10071340	10074098
Vradi06g06310	MQTLLG6-1	PHAVU_008G245700g	8	56039481	56042849		C.cajan_36302	KQ483669.1	31322	36530
Vradi06g06320	MQTLLG6-1	PHAVU_008G245900g	8	56060979	56066448		C.cajan_36301	KQ483669.1	9778	10809
Vradi06g06330	MQTLLG6-1	PHAVU_008G246000g	8	56074147	56075959
Vradi06g06340	MQTLLG6-1	PHAVU_008G246100g	8	56097194	56101841		C.cajan_05460	2	10308785	10311625
Vradi06g06340	MQTLLG6-1	PHAVU_008G246100g	8	56097194	56101841		C.cajan_05459	2	10304891	10307716
Vradi06g06340	MQTLLG6-1	PHAVU_008G246100g	8	56097194	56101841		C.cajan_05456	2	10271536	10275060
Vradi06g06350	MQTLLG6-1	PHAVU_008G246200g	8	56103952	56105263		C.cajan_05457	2	10277190	10279263
Vradi06g06360	MQTLLG6-1						C.cajan_19721	1	5580027	5581508
Vradi06g06370	MQTLLG6-1	PHAVU_008G247400g	8	56220046	56223617		C.cajan_05462	2	10334779	10338202
Vradi06g06380	MQTLLG6-1	PHAVU_008G245100g	8	55941610	55946157		C.cajan_36306	KQ483669.1	99149	104480
Vradi06g06380	MQTLLG6-1	PHAVU_008G245200g	8	55962918	55970590		C.cajan_36306	KQ483669.1	99149	104480
Vradi06g06380	MQTLLG6-1	PHAVU_008G244900g	8	55914578	55919238		C.cajan_36306	KQ483669.1	99149	104480
Vradi06g06380	MQTLLG6-1	PHAVU_008G244500g	8	55866539	55872135		C.cajan_36306	KQ483669.1	99149	104480
Vradi06g06380	MQTLLG6-1	PHAVU_008G247200g	8	56171768	56177165		C.cajan_36306	KQ483669.1	99149	104480
Vradi06g06380	MQTLLG6-1	PHAVU_008G246500g	8	56117566	56123218		C.cajan_36306	KQ483669.1	99149	104480
Vradi06g06380	MQTLLG6-1	PHAVU_008G2468000g	8	56140136	56142031		C.cajan_36306	KQ483669.1	99149	104480
Vradi06g06380	MQTLLG6-1	PHAVU_008G247300g	8	56183153	56188552		C.cajan_36306	KQ483669.1	99149	104480
Vradi06g06380	MQTLLG6-1	PHAVU_008G247000g	8	56150081	56155745		C.cajan_36306	KQ483669.1	99149	104480
Vradi06g06390	MQTLLG6-1	PHAVU_008G247500g	8	56229384	56235717		C.cajan_05463	2	10360566	10365175
Vradi06g06400	MQTLLG6-1	PHAVU_008G247700g	8	56243371	56245273		C.cajan_05464	2	10366784	10367941
Vradi06g06410	MQTLLG6-1	PHAVU_008G247800g	8	56251904	56255195		C.cajan_05465	2	10375134	10377503
Vradi06g07120	MQTLLG6-2	PHAVU_008G263900g	8	57585407	57590331		C.cajan_29264	KQ483594.1	232400	236626
Vradi06g07130	MQTLLG6-2	PHAVU_008G264000g	8	57591154	57592056		C.cajan_29263	KQ483594.1	230308	231225
Vradi06g07140	MQTLLG6-2	PHAVU_008G190200g	8	49495894	49506394	MQTL-YC8.3	C.cajan_29262	KQ483594.1	214401	219275
Vradi06g07150	MQTLLG6-2	PHAVU_008G190100g	8	49492829	49493293	MQTL-YC8.3	C.cajan_29261	KQ483594.1	209427	209882
Vradi06g07160	MQTLLG6-2
Vradi06g07170	MQTLLG6-2	PHAVU_008G190000g	8	49446733	49459606	MQTL-YC8.3	C.cajan_29260	KQ483594.1	192057	204169
Vradi06g07180	MQTLLG6-2	PHAVU_008G189900g	8	49443370	49445870	MQTL-YC8.3	C.cajan_29259	KQ483594.1	187927	189639
Vradi06g07190	MQTLLG6-2
Vradi06g07200	MQTLLG6-2	PHAVU_008G189800g	8	49428095	49433070	MQTL-YC8.3	C.cajan_29258	KQ483594.1	181032	186120
Vradi06g07210	MQTLLG6-2	PHAVU_008G189700g	8	49418781	49426597	MQTL-YC8.3	C.cajan_29257	KQ483594.1	164462	176461
Vradi06g07220	MQTLLG6-2	PHAVU_008G189200g	8	49345243	49347808	MQTL-YC8.3	C.cajan_40312	KQ484205.1	77488	79922
Vradi06g07230	MQTLLG6-2	PHAVU_008G189100g	8	49328054	49331888	MQTL-YC8.3	C.cajan_40311	KQ484205.1	67951	71944
Vradi06g07240	MQTLLG6-2	PHAVU_008G188900g	8	49311195	49315269	MQTL-YC8.3	C.cajan_40306	KQ484205.1	42764	45842
Vradi06g07250	MQTLLG6-2	PHAVU_008G189000g	8	49316323	49317900	MQTL-YC8.3	C.cajan_40310	KQ484205.1	56956	58389
Vradi06g07260	MQTLLG6-2	PHAVU_008G188800g	8	49283393	49290512	MQTL-YC8.3	C.cajan_40305	KQ484205.1	19707	33750
Vradi06g07270	MQTLLG6-2						C.cajan_40304	KQ484205.1	7180	13181
Vradi06g07280	MQTLLG6-2	PHAVU_011G030400g	11	2559252	2564373
Vradi06g07910	MQTLLG6-3	PHAVU_008G172800g	8	45412204	45415705	MQTL-YC8.3	C.cajan_05026	2	5741660	5744689
Vradi06g07920	MQTLLG6-3	PHAVU_008G173000g	8	45436834	45441416	MQTL-YC8.3	C.cajan_05027	2	5751768	5756956
Vradi06g07930	MQTLLG6-3	PHAVU_003G116000g	3	28925092	28927212	MQTL-YC3.3	C.cajan_34433	KQ483702.1	241236	243518
Vradi06g07930	MQTLLG6-3	PHAVU_003G116000g	3	28925092	28927212	MQTL-YC3.3	C.cajan_12311	6	13619261	13619692
Vradi06g07930	MQTLLG6-3	PHAVU_003G116000g	3	28925092	28927212	MQTL-YC3.3	C.cajan_04580	2	647809	648069
Vradi06g07930	MQTLLG6-3	PHAVU_003G116000g	3	28925092	28927212	MQTL-YC3.3	C.cajan_45799	KQ484794.1	12786	13421
Vradi06g07930	MQTLLG6-3	PHAVU_003G116000g	3	28925092	28927212	MQTL-YC3.3	C.cajan_40257	KQ484390.1	27728	28291
Vradi06g07930	MQTLLG6-3	PHAVU_003G116000g	3	28925092	28927212	MQTL-YC3.3	C.cajan_13722	10	3932980	3933861
Vradi06g07930	MQTLLG6-3	PHAVU_003G116000g	3	28925092	28927212	MQTL-YC3.3	C.cajan_35824	KQ483618.1	133955	134785
Vradi06g07930	MQTLLG6-3	PHAVU_001G081900g	1	13514905	13519177	MQTL-YC1.2	C.cajan_34433	KQ483702.1	241236	243518
Vradi06g07930	MQTLLG6-3	PHAVU_001G081900g	1	13514905	13519177	MQTL-YC1.2	C.cajan_12311	6	13619261	13619692
Vradi06g07930	MQTLLG6-3	PHAVU_001G081900g	1	13514905	13519177	MQTL-YC1.2	C.cajan_04580	2	647809	648069
Vradi06g07930	MQTLLG6-3	PHAVU_001G081900g	1	13514905	13519177	MQTL-YC1.2	C.cajan_45799	KQ484794.1	12786	13421
Vradi06g07930	MQTLLG6-3	PHAVU_001G081900g	1	13514905	13519177	MQTL-YC1.2	C.cajan_40257	KQ484390.1	27728	28291
Vradi06g07930	MQTLLG6-3	PHAVU_001G081900g	1	13514905	13519177	MQTL-YC1.2	C.cajan_13722	10	3932980	3933861
Vradi06g07930	MQTLLG6-3	PHAVU_001G081900g	1	13514905	13519177	MQTL-YC1.2	C.cajan_35824	KQ483618.1	133955	134785
Vradi06g07940	MQTLLG6-3	PHAVU_008G173100g	8	45459136	45463438	MQTL-YC8.3	C.cajan_05028	2	5758585	5761406
Vradi06g07950	MQTLLG6-3	PHAVU_009G030800g	9	6769739	6773168		C.cajan_19274	1	1060827	1069132
Vradi06g07950	MQTLLG6-3	PHAVU_009G0305001g	9	6709220	6710172		C.cajan_19274	1	1060827	1069132
Vradi06g07960	MQTLLG6-3	PHAVU_008G173200g	8	45501119	45503846	MQTL-YC8.3	C.cajan_05029	2	5765115	5768640
Vradi06g07970	MQTLLG6-3
Vradi06g07980	MQTLLG6-3	PHAVU_003G074000g	3	11401201	11403100		C.cajan_47755	AGCT01025736.1	200	871
Vradi06g07980	MQTLLG6-3	PHAVU_003G0518001g	3	6363755	6365053		C.cajan_47755	AGCT01025736.1	200	871
Vradi06g07990	MQTLLG6-3
Vradi06g10690	MQTLLG6-4	PHAVU_008G161400g	8	41457736	41459922	MQTL-YC8.3	C.cajan_01183	11	12605258	12607801
Vradi06g10700	MQTLLG6-4	PHAVU_008G161500g	8	41460843	41468590	MQTL-YC8.3
Vradi06g10710	MQTLLG6-4	PHAVU_008G161800g	8	41502732	41504692	MQTL-YC8.3	C.cajan_14444	10	12745928	12747710
Vradi06g10720	MQTLLG6-4
Vradi06g10730	MQTLLG6-4	PHAVU_008G161900g	8	41539616	41542541	MQTL-YC8.3	C.cajan_14684	10	15228821	15232099
Vradi06g10740	MQTLLG6-4	PHAVU_008G162800g	8	41788503	41790676	MQTL-YC8.3
Vradi06g10750	MQTLLG6-4
Vradi06g10760	MQTLLG6-4
Vradi06g10770	MQTLLG6-4	PHAVU_003G281400g	3	50729955	50735814		C.cajan_25262	KQ483420.1	401699	407260
Vradi06g10780	MQTLLG6-4	PHAVU_001G061400g	1	7535226	7540023	MQTL-YC1.2	C.cajan_04595	2	843134	851173
Vradi06g10790	MQTLLG6-4
Vradi06g10800	MQTLLG6-4	PHAVU_008G163100g	8	41891605	41902215	MQTL-YC8.3	C.cajan_29841	KQ483583.1	38619	49327
Vradi06g10810	MQTLLG6-4	PHAVU_008G163200g	8	41927125	41936504	MQTL-YC8.3	C.cajan_29840	KQ483583.1	27723	34047
Vradi06g10820	MQTLLG6-4	PHAVU_008G1633001g	8	41948385	41959671	MQTL-YC8.3	C.cajan_30430	KQ483653.1	247149	270169
Vradi06g10820	MQTLLG6-4	PHAVU_008G163400g	8	41966507	41979705	MQTL-YC8.3	C.cajan_30430	KQ483653.1	247149	270169
Vradi06g10830	MQTLLG6-4	PHAVU_008G163500g	8	41999933	42002633	MQTL-YC8.3	C.cajan_30432	KQ483653.1	282316	284201
Vradi06g10840	MQTLLG6-4
Vradi06g10850	MQTLLG6-4
Vradi06g10860	MQTLLG6-4	PHAVU_008G163700g	8	42084014	42086570	MQTL-YC8.3
Vradi06g10870	MQTLLG6-4	PHAVU_008G163800g	8	42091109	42095870	MQTL-YC8.3	C.cajan_10312	3	22894840	22899199
Vradi06g10880	MQTLLG6-4	PHAVU_008G163900g	8	42120717	42126504	MQTL-YC8.3	C.cajan_10313	3	22900987	22918107
Vradi06g10890	MQTLLG6-4	PHAVU_008G164000g	8	42158005	42162371	MQTL-YC8.3
Vradi06g10900	MQTLLG6-4	PHAVU_008G164100g	8	42191532	42195832	MQTL-YC8.3
Vradi06g10910	MQTLLG6-4
Vradi06g10920	MQTLLG6-4	PHAVU_004G076600g	4	12833484	12836773	MQTL-YC4.2	C.cajan_44509	KQ484674.1	42401	45322
Vradi06g10930	MQTLLG6-4						C.cajan_10320	3	23008118	23023384
Vradi06g10940	MQTLLG6-4	PHAVU_008G164300g	8	42492472	42502492	MQTL-YC8.3	C.cajan_35981	KQ483685.1	119450	127801
Vradi06g10950	MQTLLG6-4	PHAVU_008G164600g	8	42526159	42539238	MQTL-YC8.3
Vradi06g10960	MQTLLG6-4	PHAVU_008G164700g	8	42568876	42573565	MQTL-YC8.3	C.cajan_35979	KQ483685.1	98149	101663
Vradi06g10970	MQTLLG6-4	PHAVU_008G164900g	8	42600720	42601443	MQTL-YC8.3	C.cajan_35978	KQ483685.1	92043	97824
Vradi06g10970	MQTLLG6-4	PHAVU_008G164800g	8	42592058	42593204	MQTL-YC8.3	C.cajan_35978	KQ483685.1	92043	97824
Vradi06g10980	MQTLLG6-4	PHAVU_008G165100g	8	42641920	42642732	MQTL-YC8.3	C.cajan_35974	KQ483685.1	46330	46857
Vradi06g10990	MQTLLG6-4	PHAVU_008G165200g	8	42672531	42673898	MQTL-YC8.3	C.cajan_32376	KQ483621.1	315822	317114
Vradi06g11000	MQTLLG6-4	PHAVU_008G165400g	8	42709251	42713421	MQTL-YC8.3	C.cajan_32375	KQ483621.1	305171	305757
Vradi06g11010	MQTLLG6-4	PHAVU_008G165500g	8	42750774	42752782	MQTL-YC8.3
Vradi06g11020	MQTLLG6-4	PHAVU_008G165700g	8	42759101	42765579	MQTL-YC8.3	C.cajan_32371	KQ483621.1	283888	289571
Vradi06g11030	MQTLLG6-4	PHAVU_008G1660001g	8	42855237	42855881	MQTL-YC8.3	C.cajan_32369	KQ483621.1	257932	263636
Vradi06g11040	MQTLLG6-4	PHAVU_008G166400g	8	42959159	42959458	MQTL-YC8.3
Vradi06g11040	MQTLLG6-4	PHAVU_008G166200g	8	42937915	42938259	MQTL-YC8.3
Vradi06g11050	MQTLLG6-4	PHAVU_008G166500g	8	42977661	42979699	MQTL-YC8.3	C.cajan_32362	KQ483621.1	206557	207752
Vradi06g11060	MQTLLG6-4	PHAVU_008G166600g	8	43003167	43010656	MQTL-YC8.3	C.cajan_32358	KQ483621.1	134908	139742
Vradi06g11070	MQTLLG6-4						C.cajan_32357	KQ483621.1	119611	126089
Vradi06g11080	MQTLLG6-4	PHAVU_003G0909000g	3	18354983	18357554		C.cajan_47310	AGCT01062913.1	181	651
Vradi06g11080	MQTLLG6-4	PHAVU_003G0909001g	3	18349753	18352724		C.cajan_47310	AGCT01062913.1	181	651
Vradi06g11090	MQTLLG6-4
Vradi06g11100	MQTLLG6-4	PHAVU_008G166800g	8	43082264	43089999	MQTL-YC8.3	C.cajan_32356	KQ483621.1	94256	100777
Vradi06g11110	MQTLLG6-4	PHAVU_006G022400g	6	10340080	10356283	MQTL-YC6.1	C.cajan_26632	KQ483426.1	848887	858115
Vradi06g11110	MQTLLG6-4	PHAVU_006G022400g	6	10340080	10356283	MQTL-YC6.1	C.cajan_26632	KQ483426.1	848887	858115
Vradi06g11120	MQTLLG6-4
Vradi06g11130	MQTLLG6-4	PHAVU_008G167700g	8	43401090	43401951	MQTL-YC8.3	C.cajan_45879	KQ485934.1	4657	5100
Vradi06g11140	MQTLLG6-4
Vradi06g11150	MQTLLG6-4	PHAVU_003G068700g	3	10126584	10128409		C.cajan_26080	KQ483451.1	567283	570017
Vradi06g11160	MQTLLG6-4
Vradi06g11170	MQTLLG6-4	PHAVU_008G168000g	8	43530648	43537164	MQTL-YC8.3	C.cajan_45880	KQ485934.1	13867	18454
Vradi06g11180	MQTLLG6-4	PHAVU_008G168100g	8	43656143	43675288	MQTL-YC8.3	C.cajan_31509	KQ483525.1	398368	405765
Vradi06g11190	MQTLLG6-4	PHAVU_008G168200g	8	43689785	43697195	MQTL-YC8.3	C.cajan_31504	KQ483525.1	351968	356679
Vradi06g11200	MQTLLG6-4	PHAVU_008G168300g	8	43745160	43752145	MQTL-YC8.3	C.cajan_31504	KQ483525.1	351968	356679
Vradi06g11210	MQTLLG6-4	PHAVU_008G168400g	8	43755331	43755954	MQTL-YC8.3	C.cajan_31502	KQ483525.1	331458	332081
Vradi06g11220	MQTLLG6-4	PHAVU_008G168500g	8	43794250	43798111	MQTL-YC8.3
Vradi06g11230	MQTLLG6-4	PHAVU_008G168500g	8	43794250	43798111	MQTL-YC8.3
Vradi06g11240	MQTLLG6-4	PHAVU_001G072500g	1	9706299	9711569	MQTL-YC1.2	C.cajan_29863	KQ483583.1	252436	255436
Vradi06g11250	MQTLLG6-4	PHAVU_001G072400g	1	9688739	9708609	MQTL-YC1.2	C.cajan_29864	KQ483583.1	256078	281347
Vradi06g11260	MQTLLG6-4	PHAVU_001G072300g	1	9669063	9679691	MQTL-YC1.2	C.cajan_29868	KQ483583.1	295488	304118
Vradi06g11270	MQTLLG6-4	PHAVU_001G072200g	1	9645823	9647539	MQTL-YC1.2	C.cajan_29871	KQ483583.1	324164	325262
Vradi06g11270	MQTLLG6-4	PHAVU_001G072200g	1	9645823	9647539	MQTL-YC1.2	C.cajan_48539	AGCT01033977.1	529	699
Vradi06g11280	MQTLLG6-4	PHAVU_007G164200g	7	39387659	39390773	MQTL-YC7.5	C.cajan_04207	11	45972650	45974426
Vradi06g11280	MQTLLG6-4	PHAVU_007G164200g	7	39387659	39390773	MQTL-YC7.5	C.cajan_28316	KQ483483.1	409448	410281
Vradi06g11290	MQTLLG6-4
Vradi06g11300	MQTLLG6-4	PHAVU_001G072000g	1	9581882	9587230	MQTL-YC1.2	C.cajan_29873	KQ483583.1	343979	349893
Vradi06g11310	MQTLLG6-4	PHAVU_001G071900g	1	9564249	9570109	MQTL-YC1.2	C.cajan_41714	KQ484654.1	39432	45008
Vradi06g11320	MQTLLG6-4	PHAVU_001G065900g	1	8375457	8375837	MQTL-YC1.2	C.cajan_41712	KQ484654.1	22718	23137
Vradi06g11320	MQTLLG6-4	PHAVU_001G065900g	1	8375457	8375837	MQTL-YC1.2	C.cajan_41713	KQ484654.1	31790	32170
Vradi06g11320	MQTLLG6-4	PHAVU_001G065900g	1	8375457	8375837	MQTL-YC1.2	C.cajan_45327	KQ485632.1	10514	10888
Vradi06g11320	MQTLLG6-4	PHAVU_001G065900g	1	8375457	8375837	MQTL-YC1.2	C.cajan_45325	KQ485632.1	813	1238
Vradi06g11320	MQTLLG6-4	PHAVU_001G065900g	1	8375457	8375837	MQTL-YC1.2	C.cajan_45326	KQ485632.1	5975	6409
Vradi06g11320	MQTLLG6-4	PHAVU_001G071800g	1	9560059	9560436	MQTL-YC1.2	C.cajan_41712	KQ484654.1	22718	23137
Vradi06g11320	MQTLLG6-4	PHAVU_001G071800g	1	9560059	9560436	MQTL-YC1.2	C.cajan_41713	KQ484654.1	31790	32170
Vradi06g11320	MQTLLG6-4	PHAVU_001G071800g	1	9560059	9560436	MQTL-YC1.2	C.cajan_45327	KQ485632.1	10514	10888
Vradi06g11320	MQTLLG6-4	PHAVU_001G071800g	1	9560059	9560436	MQTL-YC1.2	C.cajan_45325	KQ485632.1	813	1238
Vradi06g11320	MQTLLG6-4	PHAVU_001G071800g	1	9560059	9560436	MQTL-YC1.2	C.cajan_45326	KQ485632.1	5975	6409
Vradi06g11330	MQTLLG6-4	PHAVU_001G071600g	1	9530945	9534936	MQTL-YC1.2	C.cajan_44442	KQ484552.1	61030	66107
Vradi06g11340	MQTLLG6-4	PHAVU_001G071200g	1	9453070	9454896	MQTL-YC1.2	C.cajan_33510	KQ483849.1	47034	48845
Vradi06g11350	MQTLLG6-4	PHAVU_001G071100g	1	9426985	9429335	MQTL-YC1.2	C.cajan_33511	KQ483849.1	54958	55923
Vradi06g11360	MQTLLG6-4	PHAVU_001G070900g	1	9381777	9391336	MQTL-YC1.2	C.cajan_33517	KQ483849.1	95630	104123
Vradi06g11370	MQTLLG6-4	PHAVU_001G070700g	1	9363102	9369873	MQTL-YC1.2	C.cajan_33518	KQ483849.1	106523	112588
Vradi06g11380	MQTLLG6-4
Vradi06g11390	MQTLLG6-4	PHAVU_002G0782000g	2	11655210	11660656	MQTL-YC2.3	C.cajan_33522	KQ483849.1	144901	182545
Vradi06g11390	MQTLLG6-4	PHAVU_002G0782001g	2	11639025	11647798	MQTL-YC2.3	C.cajan_33522	KQ483849.1	144901	182545
Vradi06g11390	MQTLLG6-4	PHAVU_001G070600g	1	9341353	9356516	MQTL-YC1.2	C.cajan_33522	KQ483849.1	144901	182545
Vradi06g11400	MQTLLG6-4	PHAVU_002G0782000g	2	11655210	11660656	MQTL-YC2.3	C.cajan_33522	KQ483849.1	144901	182545
Vradi06g11400	MQTLLG6-4	PHAVU_002G0782001g	2	11639025	11647798	MQTL-YC2.3	C.cajan_33522	KQ483849.1	144901	182545
Vradi06g11400	MQTLLG6-4	PHAVU_001G070600g	1	9341353	9356516	MQTL-YC1.2	C.cajan_33522	KQ483849.1	144901	182545
Vradi06g11410	MQTLLG6-4	PHAVU_001G070500g	1	9314478	9331840	MQTL-YC1.2	C.cajan_20353	1	12320174	12336004
Vradi06g11410	MQTLLG6-4	PHAVU_001G070500g	1	9314478	9331840	MQTL-YC1.2	C.cajan_20353	1	12320174	12336004
Vradi06g11420	MQTLLG6-4
Vradi06g11430	MQTLLG6-4	PHAVU_001G069400g	1	9076566	9079018	MQTL-YC1.2
Vradi06g11430	MQTLLG6-4	PHAVU_001G070100g	1	9260542	9263330	MQTL-YC1.2
Vradi06g11430	MQTLLG6-4	PHAVU_L0007000g	scaffold_16	31479	32244
Vradi06g11430	MQTLLG6-4	PHAVU_001G069000g	1	8995405	8996156	MQTL-YC1.2
Vradi06g11430	MQTLLG6-4	PHAVU_001G068600g	1	8946772	8948262	MQTL-YC1.2
Vradi06g11430	MQTLLG6-4	PHAVU_001G069700g	1	9116079	9116459	MQTL-YC1.2
Vradi06g11440	MQTLLG6-4
Vradi06g11450	MQTLLG6-4	PHAVU_001G069400g	1	9076566	9079018	MQTL-YC1.2
Vradi06g11450	MQTLLG6-4	PHAVU_001G070100g	1	9260542	9263330	MQTL-YC1.2
Vradi06g11450	MQTLLG6-4	PHAVU_L0007000g	scaffold_16	31479	32244
Vradi06g11450	MQTLLG6-4	PHAVU_001G069000g	1	8995405	8996156	MQTL-YC1.2
Vradi06g11450	MQTLLG6-4	PHAVU_001G068600g	1	8946772	8948262	MQTL-YC1.2
Vradi06g11450	MQTLLG6-4	PHAVU_001G069700g	1	9116079	9116459	MQTL-YC1.2
Vradi06g11460	MQTLLG6-4	PHAVU_001G069400g	1	9076566	9079018	MQTL-YC1.2
Vradi06g11460	MQTLLG6-4	PHAVU_001G070100g	1	9260542	9263330	MQTL-YC1.2
Vradi06g11460	MQTLLG6-4	PHAVU_L0007000g	scaffold_16	31479	32244
Vradi06g11460	MQTLLG6-4	PHAVU_001G069000g	1	8995405	8996156	MQTL-YC1.2
Vradi06g11460	MQTLLG6-4	PHAVU_001G068600g	1	8946772	8948262	MQTL-YC1.2
Vradi06g11460	MQTLLG6-4	PHAVU_001G069700g	1	9116079	9116459	MQTL-YC1.2
Vradi06g11470	MQTLLG6-4
Vradi06g11480	MQTLLG6-4
Vradi06g11490	MQTLLG6-4	PHAVU_001G068100g	1	8874861	8877522	MQTL-YC1.2	C.cajan_20350	1	12289496	12290617
Vradi06g11500	MQTLLG6-4	PHAVU_001G067300g	1	8642080	8646688	MQTL-YC1.2	C.cajan_20336	1	12114336	12122498
Vradi06g11510	MQTLLG6-4	PHAVU_001G067200g	1	8617522	8622796	MQTL-YC1.2	C.cajan_20335	1	12100768	12105929
Vradi06g11520	MQTLLG6-4	PHAVU_001G067000g	1	8595350	8600839	MQTL-YC1.2	C.cajan_32460	KQ483565.1	301809	302705
Vradi06g11530	MQTLLG6-4	PHAVU_001G066600g	1	8555553	8560503	MQTL-YC1.2	C.cajan_32459	KQ483565.1	295024	298929
Vradi06g11540	MQTLLG6-4	PHAVU_001G066300g	1	8501147	8504760	MQTL-YC1.2	C.cajan_03280	11	36044654	36050405
Vradi06g11540	MQTLLG6-4	PHAVU_001G066400g	1	8512728	8515841	MQTL-YC1.2	C.cajan_03280	11	36044654	36050405
Vradi06g11540	MQTLLG6-4	PHAVU_001G066200g	1	8490434	8494585	MQTL-YC1.2	C.cajan_03280	11	36044654	36050405
Vradi06g11550	MQTLLG6-4	PHAVU_001G066300g	1	8501147	8504760	MQTL-YC1.2	C.cajan_03280	11	36044654	36050405
Vradi06g11550	MQTLLG6-4	PHAVU_001G066400g	1	8512728	8515841	MQTL-YC1.2	C.cajan_03280	11	36044654	36050405
Vradi06g11550	MQTLLG6-4	PHAVU_001G066200g	1	8490434	8494585	MQTL-YC1.2	C.cajan_03280	11	36044654	36050405
Vradi06g11560	MQTLLG6-4	PHAVU_007G218700g	7	45781018	45782005		C.cajan_06725	2	24130144	24130788
Vradi06g11570	MQTLLG6-4	PHAVU_001G066300g	1	8501147	8504760	MQTL-YC1.2	C.cajan_03280	11	36044654	36050405
Vradi06g11570	MQTLLG6-4	PHAVU_001G066400g	1	8512728	8515841	MQTL-YC1.2	C.cajan_03280	11	36044654	36050405
Vradi06g11570	MQTLLG6-4	PHAVU_001G066200g	1	8490434	8494585	MQTL-YC1.2	C.cajan_03280	11	36044654	36050405
Vradi06g11580	MQTLLG6-4	PHAVU_001G066000g	1	8381806	8385990	MQTL-YC1.2
Vradi06g11590	MQTLLG6-4	PHAVU_001G065700g	1	8328312	8333914	MQTL-YC1.2
Vradi06g11600	MQTLLG6-4	PHAVU_001G065500g	1	8292901	8301322	MQTL-YC1.2	C.cajan_05733	2	13088610	13094835
Vradi06g11600	MQTLLG6-4	PHAVU_001G0656000g	1	8308191	8309121	MQTL-YC1.2	C.cajan_05733	2	13088610	13094835
Vradi06g11610	MQTLLG6-4
Vradi06g11620	MQTLLG6-4
Vradi06g11630	MQTLLG6-4	PHAVU_001G065300g	1	8234705	8236152	MQTL-YC1.2	C.cajan_15200	10	20884071	20886468
Vradi06g11640	MQTLLG6-4	PHAVU_001G065400g	1	8258937	8262787	MQTL-YC1.2	C.cajan_05732	2	13070683	13073874
Vradi06g11650	MQTLLG6-4	PHAVU_001G065100g	1	8197846	8200356	MQTL-YC1.2	C.cajan_15195	10	20819471	20820136
Vradi06g11660	MQTLLG6-4	PHAVU_001G064900g	1	8167884	8173167	MQTL-YC1.2	C.cajan_05731	2	13051273	13059774
Vradi06g11670	MQTLLG6-4	PHAVU_001G064800g	1	8161995	8166619	MQTL-YC1.2	C.cajan_05729	2	13031906	13038667
Vradi06g11680	MQTLLG6-4	PHAVU_001G064700g	1	8148616	8150031	MQTL-YC1.2	C.cajan_05727	2	13025199	13026197
Vradi06g11690	MQTLLG6-4	PHAVU_001G064600g	1	8116183	8118029	MQTL-YC1.2	C.cajan_04658	2	1538795	1540340
Vradi06g11700	MQTLLG6-4	PHAVU_001G064500g	1	8082288	8086349	MQTL-YC1.2	C.cajan_04665	2	1595780	1597531
Vradi06g11710	MQTLLG6-4	PHAVU_001G064400g	1	8066317	8076568	MQTL-YC1.2
Vradi06g11720	MQTLLG6-4
Vradi06g11730	MQTLLG6-4	PHAVU_001G064200g	1	8009739	8021477	MQTL-YC1.2	C.cajan_04674	2	1631227	1643811
Vradi06g11740	MQTLLG6-4
Vradi06g11750	MQTLLG6-4	PHAVU_001G064100g	1	7999637	8001387	MQTL-YC1.2	C.cajan_31221	KQ483514.1	449838	451132
Vradi06g11760	MQTLLG6-4	PHAVU_001G064000g	1	7989513	7992498	MQTL-YC1.2	C.cajan_41227	KQ484339.1	5115	8050
Vradi06g11770	MQTLLG6-4	PHAVU_001G0639000g	1	7976534	7980025	MQTL-YC1.2	C.cajan_41228	KQ484339.1	23990	32078
Vradi06g11770	MQTLLG6-4	PHAVU_001G0639001g	1	7972347	7974179	MQTL-YC1.2	C.cajan_41228	KQ484339.1	23990	32078
Vradi06g11780	MQTLLG6-4	PHAVU_001G063800g	1	7952925	7961945	MQTL-YC1.2	C.cajan_41230	KQ484339.1	58747	62278
Vradi06g11790	MQTLLG6-4	PHAVU_001G063700g	1	7936453	7943857	MQTL-YC1.2	C.cajan_04605	2	1052915	1058746
Vradi06g11800	MQTLLG6-4
Vradi06g11810	MQTLLG6-4	PHAVU_001G063600g	1	7926939	7930786	MQTL-YC1.2	C.cajan_31128	KQ483588.1	28599	29579
Vradi06g11810	MQTLLG6-4	PHAVU_001G063600g	1	7926939	7930786	MQTL-YC1.2	C.cajan_31123	KQ483588.1	8423	10397
Vradi06g11820	MQTLLG6-4	PHAVU_001G0635000g	1	7906622	7907474	MQTL-YC1.2	C.cajan_11163	6	1520519	1521666
Vradi06g11820	MQTLLG6-4	PHAVU_001G0635000g	1	7906622	7907474	MQTL-YC1.2	C.cajan_11159	6	1488253	1489383
Vradi06g11820	MQTLLG6-4	PHAVU_001G0635001g	1	7905234	7905986	MQTL-YC1.2	C.cajan_11163	6	1520519	1521666
Vradi06g11820	MQTLLG6-4	PHAVU_001G0635001g	1	7905234	7905986	MQTL-YC1.2	C.cajan_11159	6	1488253	1489383
Vradi06g11830	MQTLLG6-4	PHAVU_001G0635000g	1	7906622	7907474	MQTL-YC1.2	C.cajan_11163	6	1520519	1521666
Vradi06g11830	MQTLLG6-4	PHAVU_001G0635000g	1	7906622	7907474	MQTL-YC1.2	C.cajan_11159	6	1488253	1489383
Vradi06g11830	MQTLLG6-4	PHAVU_001G0635001g	1	7905234	7905986	MQTL-YC1.2	C.cajan_11163	6	1520519	1521666
Vradi06g11830	MQTLLG6-4	PHAVU_001G0635001g	1	7905234	7905986	MQTL-YC1.2	C.cajan_11159	6	1488253	1489383
Vradi06g11840	MQTLLG6-4	PHAVU_007G154500g	7	37787897	37795102	MQTL-YC7.5	C.cajan_02209	11	24374499	24379040
Vradi06g11850	MQTLLG6-4	PHAVU_001G062900g	1	7798655	7807657	MQTL-YC1.2	C.cajan_41374	KQ484548.1	44286	46180
Vradi06g11850	MQTLLG6-4	PHAVU_001G062900g	1	7798655	7807657	MQTL-YC1.2	C.cajan_41374	KQ484548.1	44286	46180
Vradi06g11860	MQTLLG6-4	PHAVU_001G063000g	1	7814080	7822757	MQTL-YC1.2	C.cajan_40796	KQ484192.1	72661	84123
Vradi06g11870	MQTLLG6-4	PHAVU_001G063200g	1	7847158	7848078	MQTL-YC1.2	C.cajan_44904	KQ485364.1	17384	17890
Vradi06g11870	MQTLLG6-4	PHAVU_001G063200g	1	7847158	7848078	MQTL-YC1.2	C.cajan_33422	KQ483507.1	350400	350900
Vradi06g11880	MQTLLG6-4	PHAVU_001G063300g	1	7859052	7865470	MQTL-YC1.2	C.cajan_44903	KQ485364.1	9536	14905
Vradi06g11890	MQTLLG6-4	PHAVU_001G063400g	1	7867819	7881248	MQTL-YC1.2	C.cajan_31129	KQ483588.1	55431	72513
Vradi06g11900	MQTLLG6-4	PHAVU_006G064200g	6	18186203	18196390		C.cajan_15169	10	20479913	20490377
Vradi06g11910	MQTLLG6-4	PHAVU_005G075500g	5	14611912	14614473		C.cajan_42753	KQ484237.1	68231	69527
Vradi06g11920	MQTLLG6-4	PHAVU_005G075400g	5	14496995	14498827		C.cajan_03321	11	36666685	36669917
Vradi06g11930	MQTLLG6-4	PHAVU_006G0125001g	6	6366380	6375526
Vradi06g11940	MQTLLG6-4
Vradi06g11950	MQTLLG6-4	PHAVU_010G006000g	10	1013200	1015361		C.cajan_34996	KQ483582.1	237578	239493
Vradi06g11960	MQTLLG6-4	PHAVU_006G042700g	6	15573327	15581155	MQTL-YC6.1	C.cajan_25527	KQ483427.1	818437	827006
Vradi06g11960	MQTLLG6-4	PHAVU_006G042700g	6	15573327	15581155	MQTL-YC6.1	C.cajan_25528	KQ483427.1	830119	838980
Vradi06g11960	MQTLLG6-4	PHAVU_006G042700g	6	15573327	15581155	MQTL-YC6.1	C.cajan_06638	2	23063644	23064920
Vradi06g11970	MQTLLG6-4	PHAVU_006G042600g	6	15564018	15571636	MQTL-YC6.1	C.cajan_25530	KQ483427.1	846588	855284
Vradi06g11980	MQTLLG6-4	PHAVU_001G062800g	1	7760819	7763587	MQTL-YC1.2	C.cajan_43304	KQ484227.1	81191	82258
Vradi06g11980	MQTLLG6-4	PHAVU_001G062800g	1	7760819	7763587	MQTL-YC1.2	C.cajan_46135	KQ485015.1	13816	15144
Vradi06g11980	MQTLLG6-4	PHAVU_001G062800g	1	7760819	7763587	MQTL-YC1.2	C.cajan_46136	KQ485015.1	22588	23916
Vradi06g11990	MQTLLG6-4	PHAVU_001G062700g	1	7738312	7742569	MQTL-YC1.2	C.cajan_45726	AGCT01055129.1	6231	9566
Vradi06g12000	MQTLLG6-4	PHAVU_001G062000g	1	7618948	7635797	MQTL-YC1.2	C.cajan_04600	2	959310	973082
Vradi06g12010	MQTLLG6-4	PHAVU_001G061900g	1	7604890	7607275	MQTL-YC1.2	C.cajan_04599	2	922124	923763
Vradi06g12020	MQTLLG6-4
Vradi06g12030	MQTLLG6-4	PHAVU_001G061200g	1	7489629	7498373	MQTL-YC1.2	C.cajan_14244	10	10089055	10098608
Vradi06g12040	MQTLLG6-4
Vradi06g12050	MQTLLG6-4	PHAVU_001G061300g	1	7514430	7524037	MQTL-YC1.2	C.cajan_04603	2	1024530	1033439
Vradi06g12060	MQTLLG6-4	PHAVU_001G061100g	1	7479137	7483383	MQTL-YC1.2	C.cajan_14239	10	10011985	10016467
Vradi06g12070	MQTLLG6-4	PHAVU_001G061000g	1	7461903	7465732	MQTL-YC1.2	C.cajan_48358	AGCT01044501.1	1403	1781
Vradi06g12070	MQTLLG6-4	PHAVU_001G061000g	1	7461903	7465732	MQTL-YC1.2	C.cajan_23792	KQ483412.1	918134	926011
Vradi06g12070	MQTLLG6-4	PHAVU_001G061000g	1	7461903	7465732	MQTL-YC1.2	C.cajan_23790	KQ483412.1	887756	893376
Vradi06g12070	MQTLLG6-4	PHAVU_001G061000g	1	7461903	7465732	MQTL-YC1.2	C.cajan_44664	KQ486111.1	11999	12605
Vradi06g12080	MQTLLG6-4	PHAVU_001G059800g	1	7172668	7177856	MQTL-YC1.2	C.cajan_25100	KQ483422.1	406328	410397
Vradi06g12090	MQTLLG6-4	PHAVU_001G085300g	1	15239192	15242946	MQTL-YC1.2	C.cajan_36629	KQ483738.1	180802	183101
Vradi06g12090	MQTLLG6-4	PHAVU_001G085300g	1	15239192	15242946	MQTL-YC1.2	C.cajan_45720	AGCT01067769.1	25239	25880
Vradi06g12090	MQTLLG6-4	PHAVU_001G085300g	1	15239192	15242946	MQTL-YC1.2	C.cajan_17607	7	3020568	3022814
Vradi06g12100	MQTLLG6-4	PHAVU_001G0849001g	1	15203983	15205872	MQTL-YC1.2	C.cajan_36633	KQ483738.1	215136	221967
Vradi06g12100	MQTLLG6-4	PHAVU_001G0849001g	1	15203983	15205872	MQTL-YC1.2	C.cajan_17605	7	3005561	3009902
Vradi06g12100	MQTLLG6-4	PHAVU_001G0849000g	1	15211350	15212885	MQTL-YC1.2	C.cajan_36633	KQ483738.1	215136	221967
Vradi06g12100	MQTLLG6-4	PHAVU_001G0849000g	1	15211350	15212885	MQTL-YC1.2	C.cajan_17605	7	3005561	3009902
Vradi06g12110	MQTLLG6-4	PHAVU_001G060000g	1	7200757	7207239	MQTL-YC1.2	C.cajan_46577	KQ484474.1	9461	12440
Vradi06g12120	MQTLLG6-4	PHAVU_001G060700g	1	7384564	7392973	MQTL-YC1.2	C.cajan_04590	2	765994	776841
Vradi06g15780	MQTLLG6-5	PHAVU_001G015100g	1	1274227	1282601	MQTL-YC1.1	C.cajan_04769	2	2772301	2780390
Vradi06g15790	MQTLLG6-5	PHAVU_001G014900g	1	1264657	1267924	MQTL-YC1.1	C.cajan_08615	3	5731906	5734191
Vradi06g15800	MQTLLG6-5
Vradi06g15810	MQTLLG6-5	PHAVU_001G014800g	1	1251214	1254314	MQTL-YC1.1	C.cajan_08616	3	5800494	5801976
Vradi06g15820	MQTLLG6-5
Vradi06g15830	MQTLLG6-5	PHAVU_001G014600g	1	1230776	1232159	MQTL-YC1.1	C.cajan_08619	3	5837229	5837579
Vradi06g15840	MQTLLG6-5	PHAVU_001G014500g	1	1215007	1226699	MQTL-YC1.1	C.cajan_43265	KQ484524.1	54385	60201
Vradi06g15850	MQTLLG6-5	PHAVU_001G014400g	1	1204951	1210271	MQTL-YC1.1	C.cajan_28357	KQ483440.1	511154	515065
Vradi06g15860	MQTLLG6-5	PHAVU_001G014300g	1	1192019	1193128	MQTL-YC1.1	C.cajan_28353	KQ483440.1	462558	462860
Vradi06g15870	MQTLLG6-5	PHAVU_001G014200g	1	1182655	1188289	MQTL-YC1.1	C.cajan_28349	KQ483440.1	436750	440699
Vradi06g15880	MQTLLG6-5	PHAVU_001G014100g	1	1177105	1180342	MQTL-YC1.1	C.cajan_28348	KQ483440.1	432455	434260
Vradi06g15890	MQTLLG6-5	PHAVU_001G014000g	1	1170391	1175633	MQTL-YC1.1	C.cajan_28347	KQ483440.1	411096	415940
Vradi06g15900	MQTLLG6-5	PHAVU_001G013900g	1	1165081	1166687	MQTL-YC1.1
Vradi06g15910	MQTLLG6-5						C.cajan_28343	KQ483440.1	363875	368824
Vradi06g15920	MQTLLG6-5	PHAVU_001G013700g	1	1156834	1159476	MQTL-YC1.1	C.cajan_28342	KQ483440.1	358438	361535
Vradi06g15930	MQTLLG6-5	PHAVU_001G013500g	1	1149909	1153823	MQTL-YC1.1	C.cajan_28340	KQ483440.1	350840	354030
Vradi06g15940	MQTLLG6-5	PHAVU_001G013300g	1	1132085	1133642	MQTL-YC1.1
Vradi06g15940	MQTLLG6-5	PHAVU_001G013400g	1	1139715	1141945	MQTL-YC1.1
Vradi06g15950	MQTLLG6-5	PHAVU_001G013200g	1	1127403	1129300	MQTL-YC1.1	C.cajan_28338	KQ483440.1	307955	309127
Vradi06g15960	MQTLLG6-5	PHAVU_001G013100g	1	1119128	1122658	MQTL-YC1.1	C.cajan_28337	KQ483440.1	286642	289965
Vradi06g15970	MQTLLG6-5	PHAVU_001G013000g	1	1110560	1113223	MQTL-YC1.1	C.cajan_28336	KQ483440.1	279361	283092
Vradi06g15970	MQTLLG6-5	PHAVU_001G013000g	1	1110560	1113223	MQTL-YC1.1	C.cajan_19372	1	1883840	1886666
Vradi06g15980	MQTLLG6-5	PHAVU_001G012900g	1	1098268	1104583	MQTL-YC1.1	C.cajan_28334	KQ483440.1	249052	256465
Vradi06g15990	MQTLLG6-5	PHAVU_001G012800g	1	1093579	1097161	MQTL-YC1.1	C.cajan_28333	KQ483440.1	239636	243649
Vradi06g16000	MQTLLG6-5
Vradi06g16010	MQTLLG6-5	PHAVU_001G012600g	1	1078192	1081813	MQTL-YC1.1	C.cajan_28327	KQ483440.1	139215	143509
Vradi06g16020	MQTLLG6-5	PHAVU_001G012400g	1	1070821	1071563	MQTL-YC1.1	C.cajan_28325	KQ483440.1	128726	129202
Vradi06g16030	MQTLLG6-5	PHAVU_001G107000g	1	27624228	27631649		C.cajan_18041	7	7819894	7822027
Vradi06g16040	MQTLLG6-5
Vradi06g16050	MQTLLG6-5	PHAVU_001G012200g	1	1048277	1052667	MQTL-YC1.1	C.cajan_33981	KQ483657.1	266300	269661
Vradi06g16060	MQTLLG6-5	PHAVU_001G012100g	1	1041997	1046852	MQTL-YC1.1	C.cajan_33977	KQ483657.1	249741	255298
Vradi06g16070	MQTLLG6-5
Vradi06g16080	MQTLLG6-5
Vradi06g16090	MQTLLG6-5						C.cajan_41294	KQ484258.1	24255	28372
Vradi06g16100	MQTLLG6-5
Vradi06g16110	MQTLLG6-5	PHAVU_003G117000g	3	29212353	29214624	MQTL-YC3.3	C.cajan_04057	11	44518769	44520100
Vradi06g16120	MQTLLG6-5	PHAVU_003G116700g	3	29147856	29153061	MQTL-YC3.3	C.cajan_25143	KQ483422.1	912986	919508
Vradi06g16130	MQTLLG6-5	PHAVU_002G333800g	2	49026721	49030555		C.cajan_34363	KQ483655.1	271172	272467
Vradi06g16130	MQTLLG6-5	PHAVU_002G333800g	2	49026721	49030555		C.cajan_36011	KQ483579.1	81097	82392
Vradi06g16140	MQTLLG6-5	PHAVU_011G216700g	11	50214230	50219377
Vradi06g16150	MQTLLG6-5	PHAVU_001G000300g	1	125452	132387		C.cajan_37018	KQ483895.1	124669	125565
Vradi06g16160	MQTLLG6-5	PHAVU_001G000400g	1	134609	140566		C.cajan_37016	KQ483895.1	108835	118194
Vradi06g16170	MQTLLG6-5	PHAVU_001G000500g	1	144309	146169		C.cajan_37019	KQ483895.1	138347	139858
Vradi06g16170	MQTLLG6-5	PHAVU_001G000500g	1	144309	146169		C.cajan_37020	KQ483895.1	156064	157582
Vradi06g16180	MQTLLG6-5	PHAVU_001G000700g	1	165085	167549		C.cajan_37022	KQ483895.1	165448	167710
Vradi06g16190	MQTLLG6-5	PHAVU_001G000600g	1	149887	162657		C.cajan_11122	6	1091655	1106943
Vradi06g16200	MQTLLG6-5	PHAVU_001G000800g	1	169087	171622		C.cajan_11123	6	1117396	1122434
Vradi06g16200	MQTLLG6-5	PHAVU_001G000800g	1	169087	171622		C.cajan_11124	6	1128108	1130083
Vradi06g16210	MQTLLG6-5	PHAVU_001G000900g	1	179027	180468		C.cajan_11128	6	1161627	1163141
Vradi06g16220	MQTLLG6-5	PHAVU_001G001000g	1	181478	184265		C.cajan_11129	6	1165063	1186763
Vradi06g16230	MQTLLG6-5	PHAVU_001G001100g	1	186295	192859
Vradi06g16240	MQTLLG6-5	PHAVU_001G001200g	1	194851	202568	MQTL-YC1.1	C.cajan_11132	6	1225781	1234327
Vradi06g16250	MQTLLG6-5	PHAVU_001G001300g	1	204982	207864	MQTL-YC1.1	C.cajan_11142	6	1289966	1295490
Vradi06g16260	MQTLLG6-5	PHAVU_001G0014001g	1	209557	215980	MQTL-YC1.1	C.cajan_11151	6	1356175	1357609
Vradi06g16270	MQTLLG6-5	PHAVU_001G001500g	1	234187	238304	MQTL-YC1.1	C.cajan_11647	6	6638872	6640049
Vradi06g16280	MQTLLG6-5	PHAVU_001G001600g	1	238905	243381	MQTL-YC1.1	C.cajan_11644	6	6609037	6624832
Vradi06g16280	MQTLLG6-5	PHAVU_001G001600g	1	238905	243381	MQTL-YC1.1	C.cajan_11644	6	6609037	6624832
Vradi06g16290	MQTLLG6-5	PHAVU_001G001700g	1	243578	247706	MQTL-YC1.1	C.cajan_11643	6	6603497	6607922
Vradi06g16300	MQTLLG6-5
Vradi06g16310	MQTLLG6-5	PHAVU_001G001900g	1	263637	267409	MQTL-YC1.1	C.cajan_39033	KQ484031.1	36492	40389
Vradi06g16310	MQTLLG6-5	PHAVU_001G001900g	1	263637	267409	MQTL-YC1.1	C.cajan_39032	KQ484031.1	8373	15588
Vradi06g16320	MQTLLG6-5	PHAVU_001G002000g	1	269005	270145	MQTL-YC1.1	C.cajan_30612	KQ483613.1	303094	303880
Vradi06g16330	MQTLLG6-5
Vradi06g16340	MQTLLG6-5	PHAVU_001G002100g	1	273444	275401	MQTL-YC1.1	C.cajan_30607	KQ483613.1	265552	266439
Vradi06g16350	MQTLLG6-5	PHAVU_002G227900g	2	39293287	39298672		C.cajan_22771	9	7245202	7251107
Vradi06g16350	MQTLLG6-5	PHAVU_002G227900g	2	39293287	39298672		C.cajan_22771	9	7245202	7251107
Vradi06g16360	MQTLLG6-5	PHAVU_001G002300g	1	280062	281538	MQTL-YC1.1	C.cajan_30603	KQ483613.1	234170	235245
Vradi06g16360	MQTLLG6-5	PHAVU_001G002600g	1	291254	292684	MQTL-YC1.1	C.cajan_30603	KQ483613.1	234170	235245
Vradi06g16370	MQTLLG6-5	PHAVU_001G002200g	1	277615	278665	MQTL-YC1.1	C.cajan_30606	KQ483613.1	250062	250799
Vradi06g16380	MQTLLG6-5	PHAVU_001G002800g	1	296138	300639	MQTL-YC1.1
Vradi06g16380	MQTLLG6-5	PHAVU_001G003300g	1	316748	318829	MQTL-YC1.1
Vradi06g16380	MQTLLG6-5	PHAVU_001G002800g	1	296138	300639	MQTL-YC1.1
Vradi06g16380	MQTLLG6-5	PHAVU_001G003300g	1	316748	318829	MQTL-YC1.1
Vradi06g16390	MQTLLG6-5
Vradi06g16400	MQTLLG6-5	PHAVU_001G003700g	1	341806	344139	MQTL-YC1.1	C.cajan_30589	KQ483613.1	63146	63316
Vradi06g16400	MQTLLG6-5	PHAVU_001G003700g	1	341806	344139	MQTL-YC1.1	C.cajan_30582	KQ483613.1	14362	15801
Vradi06g16400	MQTLLG6-5	PHAVU_001G003700g	1	341806	344139	MQTL-YC1.1	C.cajan_30587	KQ483613.1	59589	59759
Vradi06g16410	MQTLLG6-5	PHAVU_001G003800g	1	345898	347853	MQTL-YC1.1	C.cajan_30578	KQ483613.1	2934	4873
Vradi06g16420	MQTLLG6-5	PHAVU_001G003900g	1	348460	350089	MQTL-YC1.1	C.cajan_41051	KQ484432.1	5368	9818
Vradi06g16430	MQTLLG6-5	PHAVU_001G004000g	1	356066	357964	MQTL-YC1.1	C.cajan_41052	KQ484432.1	18775	28224
Vradi06g16430	MQTLLG6-5	PHAVU_001G004000g	1	356066	357964	MQTL-YC1.1	C.cajan_41057	KQ484432.1	74597	76695
Vradi07g00200	MQTLLG7-1	PHAVU_009G233000g	9	34371318	34376515		C.cajan_38573	KQ484059.1	52156	54144
Vradi07g00210	MQTLLG7-1	PHAVU_006G014400g	6	7036336	7037850		C.cajan_38574	KQ484059.1	67281	67826
Vradi07g00220	MQTLLG7-1
Vradi07g00230	MQTLLG7-1	PHAVU_006G014200g	6	6959076	6965798		C.cajan_38577	KQ484059.1	89326	93968
Vradi07g00240	MQTLLG7-1	PHAVU_006G014100g	6	6910376	6921241		C.cajan_25813	KQ483425.1	758702	763318
Vradi07g00250	MQTLLG7-1	PHAVU_006G014000g	6	6906008	6910364		C.cajan_25814	KQ483425.1	764133	768935
Vradi07g00250	MQTLLG7-1	PHAVU_006G014000g	6	6906008	6910364		C.cajan_25814	KQ483425.1	764133	768935
Vradi07g00260	MQTLLG7-1	PHAVU_006G013900g	6	6887182	6889301		C.cajan_25816	KQ483425.1	785422	786972
Vradi07g00270	MQTLLG7-1	PHAVU_006G013800g	6	6843192	6843971		C.cajan_01985	11	21792221	21792784
Vradi07g00270	MQTLLG7-1	PHAVU_006G013800g	6	6843192	6843971		C.cajan_01983	11	21781147	21781803
Vradi07g00270	MQTLLG7-1	PHAVU_006G013800g	6	6843192	6843971		C.cajan_26421	KQ483433.1	183578	184264
Vradi07g00280	MQTLLG7-1	PHAVU_006G013600g	6	6720746	6723851		C.cajan_34856	KQ483896.1	67103	68689
Vradi07g00280	MQTLLG7-1	PHAVU_003G138800g	3	33142046	33147139		C.cajan_34856	KQ483896.1	67103	68689
Vradi07g00290	MQTLLG7-1	PHAVU_006G007300g	6	3851096	3851713		C.cajan_22260	9	1667802	1668383
Vradi07g00290	MQTLLG7-1	PHAVU_006G007300g	6	3851096	3851713		C.cajan_22262	9	1685838	1694556
Vradi07g00300	MQTLLG7-1	PHAVU_003G251500g	3	47910673	47912527	MQTL-YC3.6	C.cajan_36372	KQ484288.1	89537	90628
Vradi07g00310	MQTLLG7-1
Vradi07g00320	MQTLLG7-1	PHAVU_003G251600g	3	47918431	47921873	MQTL-YC3.6
Vradi07g00330	MQTLLG7-1	PHAVU_003G251800g	3	47946723	47948547	MQTL-YC3.6	C.cajan_29031	KQ483442.1	722803	724813
Vradi07g00340	MQTLLG7-1
Vradi07g00350	MQTLLG7-1	PHAVU_003G251900g	3	47957956	47965944	MQTL-YC3.6	C.cajan_36165	KQ483822.1	77288	80279
Vradi07g00360	MQTLLG7-1	PHAVU_003G252000g	3	47973490	47979273	MQTL-YC3.6	C.cajan_36170	KQ483822.1	153460	156216
Vradi07g00370	MQTLLG7-1	PHAVU_011G1256002g	11	26861458	26861707
Vradi07g00370	MQTLLG7-1	PHAVU_011G1256001g	11	26860851	26861205
Vradi07g00370	MQTLLG7-1	PHAVU_001G0890002g	1	16260942	16263215	MQTL-YC1.2
Vradi07g00370	MQTLLG7-1	PHAVU_011G1256003g	11	26861954	26862500
Vradi07g00380	MQTLLG7-1	PHAVU_003G252200g	3	47996213	47997847	MQTL-YC3.6	C.cajan_39766	KQ484062.1	109020	110573
Vradi07g00390	MQTLLG7-1	PHAVU_003G252300g	3	48016266	48025242	MQTL-YC3.6	C.cajan_39762	KQ484062.1	63201	66947
Vradi07g00400	MQTLLG7-1	PHAVU_003G252400g	3	48029628	48033140	MQTL-YC3.6	C.cajan_39759	KQ484062.1	18899	21156
Vradi07g00410	MQTLLG7-1	PHAVU_003G252500g	3	48054449	48056759	MQTL-YC3.6
Vradi07g00420	MQTLLG7-1	PHAVU_003G252600g	3	48057295	48060619	MQTL-YC3.6	C.cajan_17556	7	2529096	2529742
Vradi07g00430	MQTLLG7-1						C.cajan_44198	KQ484613.1	60287	63323
Vradi07g00440	MQTLLG7-1	PHAVU_003G252900g	3	48083242	48086942	MQTL-YC3.6	C.cajan_44197	KQ484613.1	50553	55065
Vradi07g00450	MQTLLG7-1	PHAVU_003G253000g	3	48090361	48094797	MQTL-YC3.6	C.cajan_44195	KQ484613.1	5152	10109
Vradi07g00460	MQTLLG7-1	PHAVU_003G253100g	3	48110623	48114757	MQTL-YC3.6	C.cajan_24180	KQ483415.1	599389	604279
Vradi07g00470	MQTLLG7-1
Vradi07g00480	MQTLLG7-1
Vradi07g00490	MQTLLG7-1	PHAVU_003G253300g	3	48132624	48136869	MQTL-YC3.6	C.cajan_24171	KQ483415.1	530558	533118
Vradi07g00500	MQTLLG7-1	PHAVU_003G253400g	3	48138038	48139049	MQTL-YC3.6	C.cajan_24170	KQ483415.1	524195	524959
Vradi07g00510	MQTLLG7-1	PHAVU_003G253500g	3	48140576	48147955	MQTL-YC3.6	C.cajan_24169	KQ483415.1	517604	521242
Vradi07g00520	MQTLLG7-1	PHAVU_003G253700g	3	48148049	48155398	MQTL-YC3.6	C.cajan_24168	KQ483415.1	510099	516982
Vradi07g00520	MQTLLG7-1	PHAVU_003G253700g	3	48148049	48155398	MQTL-YC3.6	C.cajan_24168	KQ483415.1	510099	516982
Vradi07g00530	MQTLLG7-1
Vradi07g00540	MQTLLG7-1	PHAVU_003G253800g	3	48157563	48161309	MQTL-YC3.6	C.cajan_24166	KQ483415.1	492832	495531
Vradi07g00550	MQTLLG7-1	PHAVU_003G253900g	3	48168593	48170822	MQTL-YC3.6	C.cajan_24163	KQ483415.1	459515	460390
Vradi07g00560	MQTLLG7-1	PHAVU_003G254000g	3	48189411	48191931	MQTL-YC3.6	C.cajan_24160	KQ483415.1	412198	418489
Vradi07g00570	MQTLLG7-1						C.cajan_24154	KQ483415.1	355245	355589
Vradi07g00580	MQTLLG7-1	PHAVU_003G2541001g	3	48192625	48193584	MQTL-YC3.6	C.cajan_24153	KQ483415.1	331719	338242
Vradi07g06530	MQTLLG7-2	PHAVU_002G169100g	2	31203299	31210318	MQTL-YC2.5	C.cajan_39288	KQ484102.1	33688	39300
Vradi07g06540	MQTLLG7-2	PHAVU_002G168900g	2	31177497	31178525	MQTL-YC2.5	C.cajan_40268	KQ484186.1	39507	40511
Vradi07g06550	MQTLLG7-2	PHAVU_002G168800g	2	31170347	31172310	MQTL-YC2.5	C.cajan_40269	KQ484186.1	45538	46614
Vradi07g06560	MQTLLG7-2	PHAVU_002G168600g	2	31135414	31138907	MQTL-YC2.5
Vradi07g06570	MQTLLG7-2	PHAVU_002G168500g	2	31119036	31122808	MQTL-YC2.5
Vradi07g06580	MQTLLG7-2	PHAVU_002G168400g	2	31098506	31107502	MQTL-YC2.5	C.cajan_20070	1	9251007	9260494
Vradi07g06590	MQTLLG7-2	PHAVU_002G168300g	2	31094659	31098090	MQTL-YC2.5	C.cajan_20071	1	9261731	9265444
Vradi07g06600	MQTLLG7-2	PHAVU_002G168100g	2	31075142	31077530	MQTL-YC2.5
Vradi07g06610	MQTLLG7-2
Vradi07g06620	MQTLLG7-2	PHAVU_002G168000g	2	31069121	31069705	MQTL-YC2.5
Vradi07g06630	MQTLLG7-2						C.cajan_11691	6	7077528	7086148
Vradi07g06640	MQTLLG7-2	PHAVU_002G167700g	2	31027215	31034525	MQTL-YC2.5	C.cajan_41742	KQ484056.1	60621	64556
Vradi07g06650	MQTLLG7-2	PHAVU_002G103300g	2	20851205	20852796		C.cajan_04896	2	4388181	4390263
Vradi07g06660	MQTLLG7-2	PHAVU_002G103400g	2	20868782	20871665		C.cajan_04900	2	4431618	4434856
Vradi07g06670	MQTLLG7-2
Vradi07g06680	MQTLLG7-2	PHAVU_002G101800g	2	20274989	20277075		C.cajan_20169	1	10135832	10137737
Vradi07g06690	MQTLLG7-2	PHAVU_002G101900g	2	20323175	20336086		C.cajan_20172	1	10167727	10179607
Vradi07g06700	MQTLLG7-2	PHAVU_002G102000g	2	20342460	20346814		C.cajan_20184	1	10247202	10251220
Vradi07g06710	MQTLLG7-2	PHAVU_002G102100g	2	20391242	20394675		C.cajan_20190	1	10291890	10295317
Vradi07g06720	MQTLLG7-2	PHAVU_002G102200g	2	20427858	20431508		C.cajan_20193	1	10311550	10318152
Vradi07g06730	MQTLLG7-2	PHAVU_002G102400g	2	20458510	20460638		C.cajan_20194	1	10320434	10322372
Vradi07g06740	MQTLLG7-2	PHAVU_002G102500g	2	20470454	20474678		C.cajan_20196	1	10373645	10376320
Vradi07g06750	MQTLLG7-2	PHAVU_002G102600g	2	20481510	20486990		C.cajan_20205	1	10443877	10449821
Vradi07g06760	MQTLLG7-2
Vradi07g06770	MQTLLG7-2	PHAVU_002G102800g	2	20660686	20671147		C.cajan_20051	1	9125565	9132984
Vradi07g06780	MQTLLG7-2	PHAVU_002G102900g	2	20705149	20707329		C.cajan_20058	1	9155723	9157168
Vradi07g06790	MQTLLG7-2
Vradi07g06800	MQTLLG7-2	PHAVU_002G103600g	2	20908247	20914461		C.cajan_13256	6	23000409	23004944
Vradi07g06810	MQTLLG7-2	PHAVU_002G101700g	2	20229020	20230952		C.cajan_20162	1	10095060	10096399
Vradi07g06810	MQTLLG7-2	PHAVU_002G101700g	2	20229020	20230952		C.cajan_20191	1	10298222	10299211
Vradi07g06810	MQTLLG7-2	PHAVU_002G101700g	2	20229020	20230952		C.cajan_20188	1	10280727	10289603
Vradi07g06820	MQTLLG7-2	PHAVU_001G1333001g	1	37668518	37669295		C.cajan_43629	KQ485430.1	18673	22907
Vradi07g06820	MQTLLG7-2	PHAVU_001G1333001g	1	37668518	37669295		C.cajan_27590	KQ483479.1	379187	380403
Vradi07g06830	MQTLLG7-2
Vradi07g06840	MQTLLG7-2	PHAVU_002G101700g	2	20229020	20230952		C.cajan_20162	1	10095060	10096399
Vradi07g06840	MQTLLG7-2	PHAVU_002G101700g	2	20229020	20230952		C.cajan_20191	1	10298222	10299211
Vradi07g06840	MQTLLG7-2	PHAVU_002G101700g	2	20229020	20230952		C.cajan_20188	1	10280727	10289603
Vradi07g06850	MQTLLG7-2	PHAVU_002G101700g	2	20229020	20230952		C.cajan_20162	1	10095060	10096399
Vradi07g06850	MQTLLG7-2	PHAVU_002G101700g	2	20229020	20230952		C.cajan_20191	1	10298222	10299211
Vradi07g06850	MQTLLG7-2	PHAVU_002G101700g	2	20229020	20230952		C.cajan_20188	1	10280727	10289603
Vradi07g06860	MQTLLG7-2	PHAVU_002G101600g	2	20196410	20201896		C.cajan_20158	1	10073537	10077707
Vradi07g06870	MQTLLG7-2	PHAVU_002G101500g	2	20174772	20180254		C.cajan_20157	1	10060418	10067293
Vradi07g06880	MQTLLG7-2	PHAVU_007G136600g	7	33676976	33679537	MQTL-YC7.5	C.cajan_23841	KQ483412.1	1451470	1453555
Vradi07g06880	MQTLLG7-2	PHAVU_007G136600g	7	33676976	33679537	MQTL-YC7.5	C.cajan_20828	1	17349398	17351603
Vradi07g06880	MQTLLG7-2	PHAVU_007G136600g	7	33676976	33679537	MQTL-YC7.5	C.cajan_37074	KQ484161.1	14033	24247
Vradi07g06880	MQTLLG7-2	PHAVU_007G136600g	7	33676976	33679537	MQTL-YC7.5	C.cajan_12104	6	11134422	11136213
Vradi07g06880	MQTLLG7-2	PHAVU_007G136600g	7	33676976	33679537	MQTL-YC7.5	C.cajan_27300	KQ483504.1	35401	36320
Vradi07g06880	MQTLLG7-2	PHAVU_007G136600g	7	33676976	33679537	MQTL-YC7.5	C.cajan_43372	KQ484513.1	16813	18464
Vradi07g06880	MQTLLG7-2	PHAVU_007G136600g	7	33676976	33679537	MQTL-YC7.5	C.cajan_03405	11	37439400	37441605
Vradi07g06880	MQTLLG7-2	PHAVU_007G136600g	7	33676976	33679537	MQTL-YC7.5	C.cajan_31315	KQ483573.1	296120	298746
Vradi07g06880	MQTLLG7-2	PHAVU_007G136600g	7	33676976	33679537	MQTL-YC7.5	C.cajan_10112	3	21037362	21038470
Vradi07g06880	MQTLLG7-2	PHAVU_007G136600g	7	33676976	33679537	MQTL-YC7.5	C.cajan_10123	3	21130688	21132432
Vradi07g06880	MQTLLG7-2	PHAVU_007G136600g	7	33676976	33679537	MQTL-YC7.5	C.cajan_39636	KQ484316.1	79511	80349
Vradi07g06880	MQTLLG7-2	PHAVU_007G136600g	7	33676976	33679537	MQTL-YC7.5	C.cajan_43375	KQ484513.1	56811	59016
Vradi07g06880	MQTLLG7-2	PHAVU_007G136600g	7	33676976	33679537	MQTL-YC7.5	C.cajan_42687	KQ485043.1	15912	17241
Vradi07g06880	MQTLLG7-2	PHAVU_007G136600g	7	33676976	33679537	MQTL-YC7.5	C.cajan_27314	KQ483504.1	139864	140965
Vradi07g06880	MQTLLG7-2	PHAVU_010G036200g	10	5360493	5362875	MQTL-YC10.1	C.cajan_23841	KQ483412.1	1451470	1453555
Vradi07g06880	MQTLLG7-2	PHAVU_010G036200g	10	5360493	5362875	MQTL-YC10.1	C.cajan_20828	1	17349398	17351603
Vradi07g06880	MQTLLG7-2	PHAVU_010G036200g	10	5360493	5362875	MQTL-YC10.1	C.cajan_37074	KQ484161.1	14033	24247
Vradi07g06880	MQTLLG7-2	PHAVU_010G036200g	10	5360493	5362875	MQTL-YC10.1	C.cajan_12104	6	11134422	11136213
Vradi07g06880	MQTLLG7-2	PHAVU_010G036200g	10	5360493	5362875	MQTL-YC10.1	C.cajan_27300	KQ483504.1	35401	36320
Vradi07g06880	MQTLLG7-2	PHAVU_010G036200g	10	5360493	5362875	MQTL-YC10.1	C.cajan_43372	KQ484513.1	16813	18464
Vradi07g06880	MQTLLG7-2	PHAVU_010G036200g	10	5360493	5362875	MQTL-YC10.1	C.cajan_03405	11	37439400	37441605
Vradi07g06880	MQTLLG7-2	PHAVU_010G036200g	10	5360493	5362875	MQTL-YC10.1	C.cajan_31315	KQ483573.1	296120	298746
Vradi07g06880	MQTLLG7-2	PHAVU_010G036200g	10	5360493	5362875	MQTL-YC10.1	C.cajan_10112	3	21037362	21038470
Vradi07g06880	MQTLLG7-2	PHAVU_010G036200g	10	5360493	5362875	MQTL-YC10.1	C.cajan_10123	3	21130688	21132432
Vradi07g06880	MQTLLG7-2	PHAVU_010G036200g	10	5360493	5362875	MQTL-YC10.1	C.cajan_39636	KQ484316.1	79511	80349
Vradi07g06880	MQTLLG7-2	PHAVU_010G036200g	10	5360493	5362875	MQTL-YC10.1	C.cajan_43375	KQ484513.1	56811	59016
Vradi07g06880	MQTLLG7-2	PHAVU_010G036200g	10	5360493	5362875	MQTL-YC10.1	C.cajan_42687	KQ485043.1	15912	17241
Vradi07g06880	MQTLLG7-2	PHAVU_010G036200g	10	5360493	5362875	MQTL-YC10.1	C.cajan_27314	KQ483504.1	139864	140965
Vradi07g06880	MQTLLG7-2	PHAVU_005G040200g	5	3981698	3984463		C.cajan_23841	KQ483412.1	1451470	1453555
Vradi07g06880	MQTLLG7-2	PHAVU_005G040200g	5	3981698	3984463		C.cajan_20828	1	17349398	17351603
Vradi07g06880	MQTLLG7-2	PHAVU_005G040200g	5	3981698	3984463		C.cajan_37074	KQ484161.1	14033	24247
Vradi07g06880	MQTLLG7-2	PHAVU_005G040200g	5	3981698	3984463		C.cajan_12104	6	11134422	11136213
Vradi07g06880	MQTLLG7-2	PHAVU_005G040200g	5	3981698	3984463		C.cajan_27300	KQ483504.1	35401	36320
Vradi07g06880	MQTLLG7-2	PHAVU_005G040200g	5	3981698	3984463		C.cajan_43372	KQ484513.1	16813	18464
Vradi07g06880	MQTLLG7-2	PHAVU_005G040200g	5	3981698	3984463		C.cajan_03405	11	37439400	37441605
Vradi07g06880	MQTLLG7-2	PHAVU_005G040200g	5	3981698	3984463		C.cajan_31315	KQ483573.1	296120	298746
Vradi07g06880	MQTLLG7-2	PHAVU_005G040200g	5	3981698	3984463		C.cajan_10112	3	21037362	21038470
Vradi07g06880	MQTLLG7-2	PHAVU_005G040200g	5	3981698	3984463		C.cajan_10123	3	21130688	21132432
Vradi07g06880	MQTLLG7-2	PHAVU_005G040200g	5	3981698	3984463		C.cajan_39636	KQ484316.1	79511	80349
Vradi07g06880	MQTLLG7-2	PHAVU_005G040200g	5	3981698	3984463		C.cajan_43375	KQ484513.1	56811	59016
Vradi07g06880	MQTLLG7-2	PHAVU_005G040200g	5	3981698	3984463		C.cajan_42687	KQ485043.1	15912	17241
Vradi07g06880	MQTLLG7-2	PHAVU_005G040200g	5	3981698	3984463		C.cajan_27314	KQ483504.1	139864	140965
Vradi07g06880	MQTLLG7-2	PHAVU_009G237300g	9	34917487	34919050		C.cajan_23841	KQ483412.1	1451470	1453555
Vradi07g06880	MQTLLG7-2	PHAVU_009G237300g	9	34917487	34919050		C.cajan_20828	1	17349398	17351603
Vradi07g06880	MQTLLG7-2	PHAVU_009G237300g	9	34917487	34919050		C.cajan_37074	KQ484161.1	14033	24247
Vradi07g06880	MQTLLG7-2	PHAVU_009G237300g	9	34917487	34919050		C.cajan_12104	6	11134422	11136213
Vradi07g06880	MQTLLG7-2	PHAVU_009G237300g	9	34917487	34919050		C.cajan_27300	KQ483504.1	35401	36320
Vradi07g06880	MQTLLG7-2	PHAVU_009G237300g	9	34917487	34919050		C.cajan_43372	KQ484513.1	16813	18464
Vradi07g06880	MQTLLG7-2	PHAVU_009G237300g	9	34917487	34919050		C.cajan_03405	11	37439400	37441605
Vradi07g06880	MQTLLG7-2	PHAVU_009G237300g	9	34917487	34919050		C.cajan_31315	KQ483573.1	296120	298746
Vradi07g06880	MQTLLG7-2	PHAVU_009G237300g	9	34917487	34919050		C.cajan_10112	3	21037362	21038470
Vradi07g06880	MQTLLG7-2	PHAVU_009G237300g	9	34917487	34919050		C.cajan_10123	3	21130688	21132432
Vradi07g06880	MQTLLG7-2	PHAVU_009G237300g	9	34917487	34919050		C.cajan_39636	KQ484316.1	79511	80349
Vradi07g06880	MQTLLG7-2	PHAVU_009G237300g	9	34917487	34919050		C.cajan_43375	KQ484513.1	56811	59016
Vradi07g06880	MQTLLG7-2	PHAVU_009G237300g	9	34917487	34919050		C.cajan_42687	KQ485043.1	15912	17241
Vradi07g06880	MQTLLG7-2	PHAVU_009G237300g	9	34917487	34919050		C.cajan_27314	KQ483504.1	139864	140965
Vradi07g06890	MQTLLG7-2	PHAVU_002G101400g	2	20153710	20159028		C.cajan_20165	1	10109346	10110469
Vradi07g06890	MQTLLG7-2	PHAVU_002G101400g	2	20153710	20159028		C.cajan_20154	1	10045996	10047326
Vradi07g06900	MQTLLG7-2	PHAVU_002G101300g	2	20148407	20152117		C.cajan_20150	1	10017244	10020907
Vradi07g06910	MQTLLG7-2
Vradi07g06920	MQTLLG7-2
Vradi07g06930	MQTLLG7-2	PHAVU_003G056000g	3	7164501	7165990		C.cajan_40143	KQ484222.1	86930	88017
Vradi07g06940	MQTLLG7-2
Vradi07g06950	MQTLLG7-2	PHAVU_003G055900g	3	7135784	7140601		C.cajan_42940	KQ484131.1	110350	113291
Vradi07g06960	MQTLLG7-2
Vradi07g06970	MQTLLG7-2
Vradi07g06980	MQTLLG7-2	PHAVU_003G055700g	3	7096970	7098143
Vradi07g06990	MQTLLG7-2	PHAVU_003G055600g	3	7071224	7074182		C.cajan_43977	KQ483837.1	75764	79536
Vradi07g07000	MQTLLG7-2
Vradi07g07010	MQTLLG7-2	PHAVU_003G055400g	3	7049246	7055202		C.cajan_20815	1	17221807	17225544
Vradi07g07020	MQTLLG7-2	PHAVU_003G055300g	3	7031592	7040173		C.cajan_20817	1	17246265	17252578
Vradi07g07030	MQTLLG7-2	PHAVU_009G163800g	9	23855532	23859223	MQTL-YC9.3	C.cajan_20818	1	17256093	17257892
Vradi07g07030	MQTLLG7-2	PHAVU_003G055200g	3	7027250	7029393		C.cajan_20818	1	17256093	17257892
Vradi07g07040	MQTLLG7-2	PHAVU_003G055100g	3	7018159	7020598		C.cajan_20819	1	17261730	17263949
Vradi07g07050	MQTLLG7-2
Vradi07g07060	MQTLLG7-2	PHAVU_009G163800g	9	23855532	23859223	MQTL-YC9.3	C.cajan_20818	1	17256093	17257892
Vradi07g07060	MQTLLG7-2	PHAVU_003G055200g	3	7027250	7029393		C.cajan_20818	1	17256093	17257892
Vradi07g07070	MQTLLG7-2	PHAVU_003G055000g	3	7010040	7017137		C.cajan_20820	1	17267077	17273917
Vradi07g07080	MQTLLG7-2
Vradi07g07090	MQTLLG7-2	PHAVU_002G180000g	2	33202250	33202789	MQTL-YC2.5	C.cajan_38912	KQ483947.1	2165	2704
Vradi07g07090	MQTLLG7-2	PHAVU_002G180000g	2	33202250	33202789	MQTL-YC2.5	C.cajan_38913	KQ483947.1	5622	6161
Vradi07g07100	MQTLLG7-2	PHAVU_002G179900g	2	33183850	33194295	MQTL-YC2.5	C.cajan_31414	KQ483611.1	318978	327961
Vradi07g07110	MQTLLG7-2	PHAVU_002G179900g	2	33183850	33194295	MQTL-YC2.5	C.cajan_31414	KQ483611.1	318978	327961
Vradi07g07120	MQTLLG7-2	PHAVU_003G067000g	3	9514875	9516261		C.cajan_13012	6	20707865	20708269
Vradi07g07130	MQTLLG7-2	PHAVU_002G179900g	2	33183850	33194295	MQTL-YC2.5	C.cajan_31414	KQ483611.1	318978	327961
Vradi07g07140	MQTLLG7-2	PHAVU_002G177900g	2	32992076	32996509	MQTL-YC2.5	C.cajan_24335	KQ483418.1	974238	976027
Vradi07g07150	MQTLLG7-2	PHAVU_002G178000g	2	33000264	33006101	MQTL-YC2.5	C.cajan_24336	KQ483418.1	979167	984871
Vradi07g07160	MQTLLG7-2
Vradi07g07170	MQTLLG7-2	PHAVU_004G054300g	4	7027861	7034718		C.cajan_42729	KQ484509.1	35719	43006
Vradi07g07180	MQTLLG7-2	PHAVU_008G153700g	8	33763235	33771875	MQTL-YC8.3	C.cajan_36902	KQ483757.1	190325	195144
Vradi07g07190	MQTLLG7-2	PHAVU_004G054400g	4	7035645	7038863		C.cajan_26381	KQ483430.1	477307	479727
Vradi07g07200	MQTLLG7-2	PHAVU_004G050500g	4	6137603	6142301		C.cajan_48397	AGCT01024411.1	1816	5451
Vradi07g07200	MQTLLG7-2	PHAVU_004G050500g	4	6137603	6142301		C.cajan_44564	KQ484969.1	16661	20265
Vradi07g07200	MQTLLG7-2	PHAVU_004G050500g	4	6137603	6142301		C.cajan_00586	11	5867058	5869013
Vradi07g07210	MQTLLG7-2	PHAVU_004G054500g	4	7055374	7057738		C.cajan_39495	KQ484106.1	911	4074
Vradi07g07220	MQTLLG7-2	PHAVU_004G054600g	4	7075125	7079504		C.cajan_33772	KQ483642.1	133891	138827
Vradi07g07230	MQTLLG7-2	PHAVU_004G054700g	4	7081065	7084515		C.cajan_33768	KQ483642.1	94375	95543
Vradi07g07240	MQTLLG7-2	PHAVU_004G055100g	4	7172659	7175967		C.cajan_41015	KQ484194.1	13662	17238
Vradi07g07250	MQTLLG7-2	PHAVU_004G055200g	4	7183009	7183700		C.cajan_43041	KQ485165.1	2216	2638
Vradi07g07260	MQTLLG7-2
Vradi07g07270	MQTLLG7-2	PHAVU_004G055400g	4	7204776	7209953		C.cajan_28658	KQ483463.1	257781	263771
Vradi07g07280	MQTLLG7-2
Vradi07g07290	MQTLLG7-2	PHAVU_004G055800g	4	7290808	7301161
Vradi07g07300	MQTLLG7-2						C.cajan_34594	KQ483631.1	275617	276213
Vradi07g07300	MQTLLG7-2						C.cajan_34591	KQ483631.1	227380	228981
Vradi07g07310	MQTLLG7-2	PHAVU_004G056200g	4	7355758	7362077		C.cajan_34592	KQ483631.1	232782	240193
Vradi07g07320	MQTLLG7-2	PHAVU_004G056300g	4	7369566	7376674
Vradi07g07330	MQTLLG7-2	PHAVU_004G056400g	4	7396606	7397508		C.cajan_06543	2	21846485	21847399
Vradi07g07340	MQTLLG7-2
Vradi07g07350	MQTLLG7-2
Vradi07g07360	MQTLLG7-2
Vradi07g07370	MQTLLG7-2	PHAVU_004G056600g	4	7451645	7452832		C.cajan_36187	KQ483885.1	126093	126797
Vradi07g07370	MQTLLG7-2	PHAVU_004G056600g	4	7451645	7452832		C.cajan_23557	KQ483411.1	108337	109083
Vradi07g07380	MQTLLG7-2
Vradi07g07390	MQTLLG7-2	PHAVU_004G056700g	4	7484777	7491337		C.cajan_23558	KQ483411.1	115445	122447
Vradi07g07400	MQTLLG7-2	PHAVU_004G056800g	4	7513547	7517405		C.cajan_23560	KQ483411.1	141319	144869
Vradi07g07410	MQTLLG7-2	PHAVU_003G262000g	3	48985798	48989600
Vradi07g07420	MQTLLG7-2	PHAVU_004G056900g	4	7532797	7536447
Vradi07g07430	MQTLLG7-2	PHAVU_004G0570001g	4	7556447	7560563		C.cajan_23570	KQ483411.1	200258	207837
Vradi07g07430	MQTLLG7-2	PHAVU_004G0570000g	4	7564265	7570074		C.cajan_23570	KQ483411.1	200258	207837
Vradi07g07440	MQTLLG7-2
Vradi07g07450	MQTLLG7-2
Vradi07g07460	MQTLLG7-2	PHAVU_004G057400g	4	7630927	7638746		C.cajan_23579	KQ483411.1	340672	345787
Vradi07g07470	MQTLLG7-2	PHAVU_004G057500g	4	7657458	7661986		C.cajan_23580	KQ483411.1	371377	377683
Vradi07g07480	MQTLLG7-2	PHAVU_002G060500g	2	6523807	6526099
Vradi07g07490	MQTLLG7-2	PHAVU_004G057900g	4	7725253	7728021		C.cajan_32427	KQ483645.1	217004	219454
Vradi07g07500	MQTLLG7-2	PHAVU_004G046600g	4	5393150	5395277		C.cajan_26721	KQ483509.1	193086	194793
Vradi07g07510	MQTLLG7-2
Vradi07g07520	MQTLLG7-2	PHAVU_004G058100g	4	7752296	7756801		C.cajan_32424	KQ483645.1	170775	175227
Vradi07g07530	MQTLLG7-2	PHAVU_004G058200g	4	7757109	7762505		C.cajan_32423	KQ483645.1	167547	169913
Vradi07g07540	MQTLLG7-2	PHAVU_004G058800g	4	7829259	7830223		C.cajan_32414	KQ483645.1	53201	54242
Vradi07g07550	MQTLLG7-2	PHAVU_004G058600g	4	7795711	7799555		C.cajan_32422	KQ483645.1	151291	154723
Vradi07g07550	MQTLLG7-2	PHAVU_004G058400g	4	7775307	7779089		C.cajan_32422	KQ483645.1	151291	154723
Vradi07g07550	MQTLLG7-2	PHAVU_004G058300g	4	7765614	7768727		C.cajan_32422	KQ483645.1	151291	154723
Vradi07g07560	MQTLLG7-2	PHAVU_004G058800g	4	7829259	7830223		C.cajan_32414	KQ483645.1	53201	54242
Vradi07g07570	MQTLLG7-2	PHAVU_004G058900g	4	7830723	7835823		C.cajan_32413	KQ483645.1	46702	52336
Vradi07g07580	MQTLLG7-2	PHAVU_004G059000g	4	7878003	7879701		C.cajan_04576	2	623436	624989
Vradi07g07590	MQTLLG7-2	PHAVU_003G285000g	3	51117625	51122683		C.cajan_41771	KQ483862.1	133198	133593
Vradi07g07590	MQTLLG7-2	PHAVU_003G285000g	3	51117625	51122683		C.cajan_41770	KQ483862.1	124530	129004
Vradi07g07600	MQTLLG7-2	PHAVU_003G285700g	3	51176436	51179375		C.cajan_40694	KQ484562.1	40137	42050
Vradi07g07610	MQTLLG7-2
Vradi07g07620	MQTLLG7-2	PHAVU_003G285600g	3	51168022	51169791
Vradi07g07630	MQTLLG7-2	PHAVU_003G285500g	3	51162046	51163262		C.cajan_15020	10	18774663	18775196
Vradi07g07640	MQTLLG7-2	PHAVU_003G285400g	3	51154700	51157621		C.cajan_15014	10	18717057	18718376
Vradi07g07650	MQTLLG7-2	PHAVU_003G285300g	3	51147717	51153259		C.cajan_15012	10	18679248	18684667
Vradi07g07660	MQTLLG7-2						C.cajan_15110	10	19906771	19907100
Vradi07g07670	MQTLLG7-2	PHAVU_003G287500g	3	51335652	51337944
Vradi07g07680	MQTLLG7-2	PHAVU_003G287400g	3	51328145	51330074
Vradi07g07690	MQTLLG7-2	PHAVU_003G287400g	3	51328145	51330074
Vradi07g07700	MQTLLG7-2	PHAVU_003G287300g	3	51322940	51325509		C.cajan_38269	KQ483733.1	61231	64488
Vradi07g07710	MQTLLG7-2	PHAVU_003G287200g	3	51313075	51318258
Vradi07g07720	MQTLLG7-2	PHAVU_007G155800g	7	37971514	37975894	MQTL-YC7.5	C.cajan_33232	KQ483697.1	139468	143159
Vradi07g07730	MQTLLG7-2	PHAVU_003G287100g	3	51301949	51304411		C.cajan_38272	KQ483733.1	128499	130217
Vradi07g02900	MQTLLG7-3	PHAVU_003G280600g	3	50613498	50619110		C.cajan_10412	3	23825640	23837196
Vradi07g02910	MQTLLG7-3	PHAVU_003G280700g	3	50621603	50631602		C.cajan_38633	KQ484452.1	13942	18711
Vradi07g02920	MQTLLG7-3	PHAVU_003G280800g	3	50636774	50638096		C.cajan_27965	KQ483469.1	194884	195885
Vradi07g02930	MQTLLG7-3	PHAVU_003G280900g	3	50648199	50651139		C.cajan_10416	3	23881258	23883761
Vradi07g02940	MQTLLG7-3	PHAVU_003G2810001g	3	50655820	50658360		C.cajan_25279	KQ483420.1	641979	646607
Vradi07g02940	MQTLLG7-3	PHAVU_003G2810000g	3	50664848	50665032		C.cajan_25279	KQ483420.1	641979	646607
Vradi07g02950	MQTLLG7-3
Vradi07g02960	MQTLLG7-3	PHAVU_003G281100g	3	50694559	50695961		C.cajan_43181	KQ483942.1	7317	12720
Vradi07g02970	MQTLLG7-3	PHAVU_003G281200g	3	50715424	50724420		C.cajan_25268	KQ483420.1	497300	498782
Vradi07g02980	MQTLLG7-3	PHAVU_003G281300g	3	50726942	50728981		C.cajan_25264	KQ483420.1	446483	447648
Vradi07g02990	MQTLLG7-3						C.cajan_25260	KQ483420.1	381495	385853
Vradi07g03430	MQTLLG7-4	PHAVU_011G027100g	11	2205872	2209960		C.cajan_34925	KQ483890.1	84439	86890
Vradi07g03440	MQTLLG7-4
Vradi07g03450	MQTLLG7-4	PHAVU_003G296800g	3	52192002	52202160		C.cajan_29037	KQ483468.1	48725	58485
Vradi07g03450	MQTLLG7-4	PHAVU_003G296800g	3	52192002	52202160		C.cajan_29037	KQ483468.1	48725	58485
Vradi07g03460	MQTLLG7-4	PHAVU_003G296900g	3	52207435	52212510		C.cajan_29035	KQ483468.1	29168	32120
Vradi07g03470	MQTLLG7-4	PHAVU_003G297000g	3	52216296	52218004		C.cajan_29034	KQ483468.1	22618	24081
Vradi07g03480	MQTLLG7-4	PHAVU_003G297100g	3	52227296	52232952		C.cajan_44877	KQ484453.1	62077	66840
Vradi07g03490	MQTLLG7-4
Vradi07g03500	MQTLLG7-4	PHAVU_003G297200g	3	52243609	52247362		C.cajan_44875	KQ484453.1	21459	24540
Vradi07g03500	MQTLLG7-4	PHAVU_006G006500g	6	2986632	2987463		C.cajan_44875	KQ484453.1	21459	24540
Vradi07g03510	MQTLLG7-4	PHAVU_003G059400g	3	7990184	7996216		C.cajan_41106	KQ484648.1	10297	14792
Vradi07g03520	MQTLLG7-4	PHAVU_003G059500g	3	7997521	8002353		C.cajan_41107	KQ484648.1	17156	21989
Vradi07g03530	MQTLLG7-4	PHAVU_003G059600g	3	8020133	8027629		C.cajan_30776	KQ483559.1	294672	297627
Vradi07g03540	MQTLLG7-4
Vradi07g03550	MQTLLG7-4	PHAVU_003G059800g	3	8031703	8032643		C.cajan_30777	KQ483559.1	298807	299345
Vradi07g03560	MQTLLG7-4	PHAVU_003G059900g	3	8035885	8047344		C.cajan_30778	KQ483559.1	300164	312581
Vradi07g03570	MQTLLG7-4	PHAVU_011G022500g	11	1757710	1760247		C.cajan_23598	KQ483411.1	604066	604858
Vradi07g03570	MQTLLG7-4	PHAVU_011G022500g	11	1757710	1760247		C.cajan_21023	4	1563918	1565378	CC_MQTL4.5
Vradi07g03580	MQTLLG7-4	PHAVU_003G060200g	3	8088496	8093217		C.cajan_30782	KQ483559.1	353267	360287
Vradi07g03590	MQTLLG7-4	PHAVU_003G060100g	3	8063468	8065670		C.cajan_30785	KQ483559.1	371448	372965
Vradi07g03600	MQTLLG7-4	PHAVU_008G005400g	8	586190	588413		C.cajan_14475	10	13102620	13103234
Vradi07g03610	MQTLLG7-4
Vradi07g03620	MQTLLG7-4	PHAVU_003G059300g	3	7929988	7932982
Vradi07g03630	MQTLLG7-4	PHAVU_003G059200g	3	7899713	7903355
Vradi07g03640	MQTLLG7-4	PHAVU_003G059000g	3	7863232	7868107		C.cajan_40969	KQ483839.1	65374	68909
Vradi07g03650	MQTLLG7-4	PHAVU_003G058900g	3	7859381	7863100		C.cajan_40970	KQ483839.1	70472	75244
Vradi07g03660	MQTLLG7-4	PHAVU_003G058800g	3	7834232	7837808		C.cajan_40972	KQ483839.1	100503	103654
Vradi07g03670	MQTLLG7-4	PHAVU_003G058700g	3	7825889	7827678
Vradi07g03680	MQTLLG7-4	PHAVU_003G058600g	3	7820206	7822465		C.cajan_40974	KQ483839.1	123964	124674
Vradi07g03690	MQTLLG7-4						C.cajan_23435	5	3968324	3973353
Vradi07g03700	MQTLLG7-4	PHAVU_003G050600g	3	6141159	6145022		C.cajan_23434	5	3961566	3966547
Vradi07g03710	MQTLLG7-4	PHAVU_003G050700g	3	6162488	6168830		C.cajan_41926	KQ484915.1	40609	42512
Vradi07g03720	MQTLLG7-4	PHAVU_003G050800g	3	6189131	6197810		C.cajan_41926	KQ484915.1	40609	42512
Vradi07g03730	MQTLLG7-4	PHAVU_003G058200g	3	7737123	7740782		C.cajan_35806	KQ483729.1	46435	49717
Vradi07g03740	MQTLLG7-4	PHAVU_003G058300g	3	7746485	7753950		C.cajan_35803	KQ483729.1	37174	40012
Vradi07g03750	MQTLLG7-4						C.cajan_35802	KQ483729.1	22908	24391
Vradi07g03760	MQTLLG7-4	PHAVU_003G058400g	3	7759925	7763918		C.cajan_35801	KQ483729.1	15701	19634
Vradi07g03770	MQTLLG7-4
Vradi07g03780	MQTLLG7-4	PHAVU_003G050400g	3	6111747	6117001		C.cajan_23437	5	4011061	4016447
Vradi07g03780	MQTLLG7-4	PHAVU_003G050400g	3	6111747	6117001		C.cajan_23437	5	4011061	4016447
Vradi07g03790	MQTLLG7-4	PHAVU_003G050300g	3	6097698	6103544		C.cajan_23439	5	4023147	4027363
Vradi07g03800	MQTLLG7-4	PHAVU_003G050200g	3	6093663	6095641		C.cajan_23440	5	4032300	4033661
Vradi07g04580	MQTLLG7-6	PHAVU_002G096700g	2	18551773	18555514	MQTL-YC2.4	C.cajan_13955	10	6469054	6469998
Vradi07g04590	MQTLLG7-6	PHAVU_002G096800g	2	18565755	18567003	MQTL-YC2.4	C.cajan_13953	10	6453603	6454596
Vradi07g04600	MQTLLG7-6	PHAVU_002G097000g	2	18596892	18598687	MQTL-YC2.4	C.cajan_13947	10	6408775	6409875
Vradi07g04600	MQTLLG7-6	PHAVU_002G097000g	2	18596892	18598687	MQTL-YC2.4	C.cajan_13938	10	6367078	6373825
Vradi07g04610	MQTLLG7-6	PHAVU_002G097000g	2	18596892	18598687	MQTL-YC2.4	C.cajan_13947	10	6408775	6409875
Vradi07g04610	MQTLLG7-6	PHAVU_002G097000g	2	18596892	18598687	MQTL-YC2.4	C.cajan_13938	10	6367078	6373825
Vradi07g04620	MQTLLG7-6
Vradi07g04630	MQTLLG7-6	PHAVU_009G159900g	9	23170976	23175887		C.cajan_08445	3	4049332	4049667
Vradi07g04640	MQTLLG7-6	PHAVU_002G097100g	2	18664675	18666441		C.cajan_13947	10	6408775	6409875
Vradi07g04640	MQTLLG7-6	PHAVU_002G097100g	2	18664675	18666441		C.cajan_13938	10	6367078	6373825
Vradi07g04650	MQTLLG7-6
Vradi07g04660	MQTLLG7-6	PHAVU_002G097200g	2	18680036	18683804		C.cajan_13937	10	6357792	6362103
Vradi07g04670	MQTLLG7-6	PHAVU_002G097300g	2	18705742	18708598		C.cajan_13936	10	6351104	6353122
Vradi07g04680	MQTLLG7-6	PHAVU_002G097400g	2	18782250	18786419		C.cajan_13934	10	6333727	6337235
Vradi07g04690	MQTLLG7-6	PHAVU_002G097500g	2	18820293	18851637		C.cajan_01125	11	11860548	11889511
Vradi07g04690	MQTLLG7-6	PHAVU_002G097500g	2	18820293	18851637		C.cajan_13932	10	6310740	6315407
Vradi07g04700	MQTLLG7-6	PHAVU_002G097700g	2	18868980	18875479		C.cajan_13927	10	6256576	6268182
Vradi07g04710	MQTLLG7-6	PHAVU_002G097800g	2	18898347	18901254		C.cajan_13923	10	6231398	6235962
Vradi07g04720	MQTLLG7-6	PHAVU_002G097900g	2	18943568	18947419		C.cajan_13929	10	6282155	6285593
Vradi07g04720	MQTLLG7-6	PHAVU_002G097900g	2	18943568	18947419		C.cajan_13916	10	6180780	6181173
Vradi07g04730	MQTLLG7-6	PHAVU_009G191800g	9	28387842	28390878		C.cajan_13914	10	6164654	6167795
Vradi07g04730	MQTLLG7-6	PHAVU_002G098000g	2	18967749	18972186		C.cajan_13914	10	6164654	6167795
Vradi07g04740	MQTLLG7-6	PHAVU_002G098100g	2	18975877	18979811		C.cajan_13913	10	6153457	6156147
Vradi07g04750	MQTLLG7-6	PHAVU_002G098200g	2	18980233	18985595		C.cajan_13912	10	6143353	6151945
Vradi07g04750	MQTLLG7-6	PHAVU_002G098200g	2	18980233	18985595		C.cajan_13919	10	6211233	6211742
Vradi07g09500	MQTLLG7-5	PHAVU_002G191300g	2	34738077	34758793	MQTL-YC2.5	C.cajan_26774	KQ483458.1	215139	231858
Vradi07g09510	MQTLLG7-5	PHAVU_002G191200g	2	34729872	34730361	MQTL-YC2.5	C.cajan_26775	KQ483458.1	242977	243354
Vradi07g09520	MQTLLG7-5	PHAVU_002G191100g	2	34708503	34718718	MQTL-YC2.5	C.cajan_26776	KQ483458.1	253073	262862
Vradi07g09530	MQTLLG7-5	PHAVU_002G190900g	2	34689955	34693551	MQTL-YC2.5	C.cajan_26778	KQ483458.1	284863	287780
Vradi07g09540	MQTLLG7-5	PHAVU_002G190700g	2	34670116	34681615	MQTL-YC2.5	C.cajan_26779	KQ483458.1	290708	303095
Vradi07g09550	MQTLLG7-5	PHAVU_002G190600g	2	34661466	34667592	MQTL-YC2.5	C.cajan_26781	KQ483458.1	305301	318137
Vradi07g09560	MQTLLG7-5	PHAVU_002G190500g	2	34655211	34658258	MQTL-YC2.5
Vradi07g09570	MQTLLG7-5	PHAVU_002G190400g	2	34643164	34645247	MQTL-YC2.5
Vradi07g09580	MQTLLG7-5	PHAVU_002G190300g	2	34636422	34637895	MQTL-YC2.5
Vradi07g09590	MQTLLG7-5	PHAVU_005G160800g	5	38608079	38610528
Vradi07g09600	MQTLLG7-5	PHAVU_002G190200g	2	34628367	34633548	MQTL-YC2.5	C.cajan_26782	KQ483458.1	330240	334681
Vradi07g09600	MQTLLG7-5	PHAVU_002G190200g	2	34628367	34633548	MQTL-YC2.5	C.cajan_26782	KQ483458.1	330240	334681
Vradi07g09610	MQTLLG7-5	PHAVU_002G190100g	2	34626181	34627540	MQTL-YC2.5	C.cajan_26784	KQ483458.1	343532	343939
Vradi07g09620	MQTLLG7-5	PHAVU_002G190000g	2	34600086	34606020	MQTL-YC2.5	C.cajan_26785	KQ483458.1	362701	367450
Vradi07g09630	MQTLLG7-5	PHAVU_002G189900g	2	34582364	34583017	MQTL-YC2.5	C.cajan_26786	KQ483458.1	377578	378240
Vradi07g09640	MQTLLG7-5	PHAVU_002G189800g	2	34570447	34577123	MQTL-YC2.5	C.cajan_26787	KQ483458.1	387291	391922
Vradi07g09640	MQTLLG7-5	PHAVU_002G189800g	2	34570447	34577123	MQTL-YC2.5	C.cajan_45116	KQ484550.1	21613	32128
Vradi07g09650	MQTLLG7-5	PHAVU_002G189700g	2	34534646	34550983	MQTL-YC2.5	C.cajan_26789	KQ483458.1	423985	438559
Vradi07g09660	MQTLLG7-5	PHAVU_002G189500g	2	34517428	34519756	MQTL-YC2.5	C.cajan_26791	KQ483458.1	449465	452403
Vradi07g09670	MQTLLG7-5	PHAVU_002G189400g	2	34501951	34504825	MQTL-YC2.5	C.cajan_26792	KQ483458.1	455857	458528
Vradi07g09670	MQTLLG7-5	PHAVU_002G189400g	2	34501951	34504825	MQTL-YC2.5	C.cajan_26792	KQ483458.1	455857	458528
Vradi07g09680	MQTLLG7-5	PHAVU_002G189300g	2	34491268	34492718	MQTL-YC2.5	C.cajan_26793	KQ483458.1	466818	467826
Vradi07g09690	MQTLLG7-5	PHAVU_002G189200g	2	34483858	34484499	MQTL-YC2.5	C.cajan_26794	KQ483458.1	470533	471030
Vradi07g09700	MQTLLG7-5	PHAVU_002G188800g	2	34408747	34412176	MQTL-YC2.5	C.cajan_26795	KQ483458.1	477748	479132
Vradi07g09710	MQTLLG7-5
Vradi07g09720	MQTLLG7-5	PHAVU_002G188700g	2	34401266	34404115	MQTL-YC2.5	C.cajan_26799	KQ483458.1	485425	489601
Vradi07g09730	MQTLLG7-5	PHAVU_002G188600g	2	34389354	34394716	MQTL-YC2.5
Vradi07g09740	MQTLLG7-5	PHAVU_002G188400g	2	34362706	34368432	MQTL-YC2.5	C.cajan_26801	KQ483458.1	501072	506071
Vradi07g09750	MQTLLG7-5
Vradi07g09760	MQTLLG7-5	PHAVU_002G188300g	2	34357705	34359009	MQTL-YC2.5	C.cajan_26802	KQ483458.1	512791	514107
Vradi07g09770	MQTLLG7-5
Vradi07g09780	MQTLLG7-5	PHAVU_002G201300g	2	36058118	36059113
Vradi07g09780	MQTLLG7-5	PHAVU_002G2001000g	2	35928026	35928903
Vradi07g09780	MQTLLG7-5	PHAVU_002G200600g	2	35998695	36000317
Vradi07g09780	MQTLLG7-5	PHAVU_002G200000g	2	35887414	35889244
Vradi07g09780	MQTLLG7-5	PHAVU_002G200200g	2	35930183	35931799
Vradi07g09780	MQTLLG7-5	PHAVU_002G200700g	2	36009164	36010780
Vradi07g09780	MQTLLG7-5	PHAVU_002G2003000g	2	35945369	35946040
Vradi07g09780	MQTLLG7-5	PHAVU_002G200400g	2	35954858	35956661
Vradi07g09780	MQTLLG7-5	PHAVU_002G199900g	2	35861394	35862278
Vradi07g09780	MQTLLG7-5	PHAVU_002G200800g	2	36026603	36028219
Vradi07g09780	MQTLLG7-5	PHAVU_002G199700g	2	35812976	35814589
Vradi07g09790	MQTLLG7-5	PHAVU_007G228000g	7	46777421	46780818
Vradi07g09790	MQTLLG7-5	PHAVU_007G228200g	7	46793886	46799141
Vradi07g09790	MQTLLG7-5	PHAVU_007G2281001g	7	46782908	46786690
Vradi07g09790	MQTLLG7-5	PHAVU_007G228300g	7	46810659	46815594
Vradi07g09790	MQTLLG7-5	PHAVU_007G228400g	7	46818666	46823512
Vradi07g09790	MQTLLG7-5	PHAVU_007G227900g	7	46766432	46771739
Vradi07g09790	MQTLLG7-5	PHAVU_007G228500g	7	46828537	46835429
Vradi07g09800	MQTLLG7-5	PHAVU_003G251400g	3	47877928	47881492	MQTL-YC3.6	C.cajan_44031	KQ484508.1	32589	32873
Vradi07g09800	MQTLLG7-5	PHAVU_003G251400g	3	47877928	47881492	MQTL-YC3.6	C.cajan_44313	KQ484283.1	45529	49438
Vradi07g17730	MQTLLG7-7
Vradi07g17740	MQTLLG7-7	PHAVU_003G182200g	3	39392038	39396883	MQTL-YC3.4	C.cajan_02904	11	32070188	32074177
Vradi07g17750	MQTLLG7-7	PHAVU_009G204000g	9	30151578	30153734
Vradi07g17760	MQTLLG7-7
Vradi07g17770	MQTLLG7-7
Vradi07g17780	MQTLLG7-7	PHAVU_003G181900g	3	39336665	39343835	MQTL-YC3.4	C.cajan_02909	11	32144009	32152860
Vradi07g17790	MQTLLG7-7	PHAVU_003G181800g	3	39320477	39327307	MQTL-YC3.4	C.cajan_02910	11	32176021	32180716
Vradi07g17800	MQTLLG7-7	PHAVU_003G181600g	3	39308941	39310508	MQTL-YC3.4
Vradi07g17810	MQTLLG7-7	PHAVU_003G181500g	3	39306174	39306806	MQTL-YC3.4	C.cajan_02912	11	32198517	32199008
Vradi07g17820	MQTLLG7-7	PHAVU_003G181400g	3	39291342	39300409	MQTL-YC3.4	C.cajan_02913	11	32202994	32216515
Vradi07g17830	MQTLLG7-7	PHAVU_003G181100g	3	39253716	39254315	MQTL-YC3.4	C.cajan_02918	11	32248396	32248659
Vradi07g17840	MQTLLG7-7	PHAVU_003G181000g	3	39245615	39252171	MQTL-YC3.4	C.cajan_02919	11	32249942	32254961
Vradi07g17850	MQTLLG7-7	PHAVU_003G180800g	3	39214634	39229001	MQTL-YC3.4	C.cajan_02925	11	32282260	32288506
Vradi07g17860	MQTLLG7-7	PHAVU_003G180700g	3	39199745	39208246	MQTL-YC3.4	C.cajan_02928	11	32298392	32308222
Vradi07g17870	MQTLLG7-7	PHAVU_003G180300g	3	39186702	39187731	MQTL-YC3.4	C.cajan_02930	11	32319684	32321077
Vradi07g17880	MQTLLG7-7	PHAVU_003G1802000g	3	39182014	39184777	MQTL-YC3.4	C.cajan_02931	11	32339336	32342849
Vradi07g17890	MQTLLG7-7	PHAVU_003G180100g	3	39177548	39180555	MQTL-YC3.4	C.cajan_02932	11	32343838	32346712
Vradi07g17900	MQTLLG7-7	PHAVU_003G180000g	3	39171521	39174562	MQTL-YC3.4	C.cajan_02933	11	32352819	32353367
Vradi07g17910	MQTLLG7-7	PHAVU_003G179700g	3	39154246	39154626	MQTL-YC3.4	C.cajan_02934	11	32365239	32365601
Vradi07g17920	MQTLLG7-7	PHAVU_003G179600g	3	39152879	39153361	MQTL-YC3.4	C.cajan_02935	11	32367812	32368282
Vradi07g17930	MQTLLG7-7	PHAVU_003G179500g	3	39144976	39151592	MQTL-YC3.4	C.cajan_02936	11	32370116	32375794
Vradi07g17940	MQTLLG7-7	PHAVU_003G179400g	3	39118764	39130166	MQTL-YC3.4	C.cajan_02937	11	32398935	32410087
Vradi07g17950	MQTLLG7-7	PHAVU_003G179300g	3	39110625	39114537	MQTL-YC3.4	C.cajan_02938	11	32415117	32419281
Vradi07g17960	MQTLLG7-7	PHAVU_003G179200g	3	39108561	39109938	MQTL-YC3.4	C.cajan_02939	11	32420580	32421371
Vradi07g17970	MQTLLG7-7	PHAVU_003G179100g	3	39092024	39096567	MQTL-YC3.4	C.cajan_01804	11	19593799	19604953
Vradi07g17980	MQTLLG7-7	PHAVU_003G179000g	3	39077201	39082113	MQTL-YC3.4	C.cajan_01810	11	19623859	19629030
Vradi07g17990	MQTLLG7-7	PHAVU_003G178900g	3	39074877	39075673	MQTL-YC3.4	C.cajan_01811	11	19635013	19636341
Vradi07g18000	MQTLLG7-7	PHAVU_003G178800g	3	39072039	39074306	MQTL-YC3.4
Vradi07g18010	MQTLLG7-7	PHAVU_003G178600g	3	39044262	39049244	MQTL-YC3.4	C.cajan_01813	11	19652400	19657211
Vradi07g18020	MQTLLG7-7	PHAVU_003G178500g	3	39042415	39044360	MQTL-YC3.4	C.cajan_01814	11	19657539	19658925
Vradi07g18030	MQTLLG7-7	PHAVU_003G178400g	3	39035844	39038362	MQTL-YC3.4	C.cajan_01815	11	19660460	19661934
Vradi07g18040	MQTLLG7-7
Vradi07g18050	MQTLLG7-7	PHAVU_003G178200g	3	39021839	39025230	MQTL-YC3.4	C.cajan_01817	11	19677762	19680424
Vradi07g18060	MQTLLG7-7	PHAVU_003G178100g	3	39018639	39020292	MQTL-YC3.4	C.cajan_27580	KQ483479.1	298266	298691
Vradi07g18060	MQTLLG7-7	PHAVU_003G178100g	3	39018639	39020292	MQTL-YC3.4	C.cajan_27566	KQ483479.1	115430	115855
Vradi07g18070	MQTLLG7-7	PHAVU_003G177900g	3	39006859	39011238	MQTL-YC3.4	C.cajan_01819	11	19687803	19691695
Vradi07g18080	MQTLLG7-7	PHAVU_003G177800g	3	39000907	39001918	MQTL-YC3.4	C.cajan_01820	11	19694433	19694891
Vradi07g18090	MQTLLG7-7	PHAVU_003G177700g	3	38991157	38991987	MQTL-YC3.4	C.cajan_01821	11	19703329	19703790
Vradi07g18100	MQTLLG7-7	PHAVU_003G177500g	3	38963708	38977372	MQTL-YC3.4	C.cajan_01824	11	19720365	19727906
Vradi07g18100	MQTLLG7-7	PHAVU_003G177500g	3	38963708	38977372	MQTL-YC3.4	C.cajan_01824	11	19720365	19727906
Vradi07g18110	MQTLLG7-7	PHAVU_007G192200g	7	42911643	42913346		C.cajan_06650	2	23280306	23281275
Vradi07g18120	MQTLLG7-7	PHAVU_003G177400g	3	38930021	38953455	MQTL-YC3.4	C.cajan_01825	11	19734987	19759839
Vradi07g18130	MQTLLG7-7	PHAVU_003G177300g	3	38915081	38919278	MQTL-YC3.4	C.cajan_01827	11	19778342	19779444
Vradi08g04300	MQTLLG8-1	PHAVU_008G1064001g	8	12154306	12155551	MQTL-YC8.3	C.cajan_37428	KQ483841.1	117537	119714
Vradi08g04310	MQTLLG8-1	PHAVU_008G106300g	8	12110562	12117440	MQTL-YC8.3
Vradi08g04320	MQTLLG8-1	PHAVU_008G066700g	8	6050799	6052466
Vradi08g04320	MQTLLG8-1	PHAVU_008G069600g	8	6256947	6258649
Vradi08g04320	MQTLLG8-1	PHAVU_008G066900g	8	6058066	6059840
Vradi08g04320	MQTLLG8-1	PHAVU_008G067100g	8	6082504	6084386
Vradi08g04320	MQTLLG8-1	PHAVU_008G066800g	8	6054931	6056434
Vradi08g04320	MQTLLG8-1	PHAVU_008G067200g	8	6093694	6095542
Vradi08g04320	MQTLLG8-1	PHAVU_008G067000g	8	6074738	6076456
Vradi08g04320	MQTLLG8-1	PHAVU_008G066600g	8	6045425	6047044
Vradi08g04330	MQTLLG8-1						C.cajan_37041	KQ483809.1	55367	57063
Vradi08g04340	MQTLLG8-1
Vradi08g04350	MQTLLG8-1	PHAVU_008G106200g	8	12101328	12102325	MQTL-YC8.3
Vradi08g04360	MQTLLG8-1	PHAVU_008G106100g	8	12098662	12100165	MQTL-YC8.3	C.cajan_37431	KQ483841.1	179883	181250
Vradi08g04370	MQTLLG8-1	PHAVU_008G106000g	8	12096197	12097769	MQTL-YC8.3	C.cajan_37432	KQ483841.1	182665	182979
Vradi08g04380	MQTLLG8-1	PHAVU_008G105900g	8	12088661	12093095	MQTL-YC8.3
Vradi08g04390	MQTLLG8-1						C.cajan_00087	11	784141	784311
Vradi08g04400	MQTLLG8-1	PHAVU_008G105700g	8	12077733	12079243	MQTL-YC8.3	C.cajan_37402	KQ483877.1	166266	167336
Vradi08g04410	MQTLLG8-1	PHAVU_008G097500g	8	10169820	10173372	MQTL-YC8.3	C.cajan_37400	KQ483877.1	138964	142047
Vradi08g04410	MQTLLG8-1	PHAVU_008G105600g	8	12071200	12074319	MQTL-YC8.3	C.cajan_37400	KQ483877.1	138964	142047
Vradi08g04410	MQTLLG8-1	PHAVU_008G118500g	8	14935813	14938949	MQTL-YC8.3	C.cajan_37400	KQ483877.1	138964	142047
Vradi08g04420	MQTLLG8-1
Vradi08g04430	MQTLLG8-1	PHAVU_008G105100g	8	12002051	12005206	MQTL-YC8.3	C.cajan_17577	7	2709398	2711758
Vradi08g04440	MQTLLG8-1	PHAVU_008G105200g	8	12017846	12022145	MQTL-YC8.3	C.cajan_17576	7	2689165	2692882
Vradi08g04450	MQTLLG8-1	PHAVU_008G1053001g	8	12028009	12031191	MQTL-YC8.3	C.cajan_37389	KQ483877.1	25245	37080
Vradi08g04460	MQTLLG8-1	PHAVU_008G105400g	8	12052421	12059661	MQTL-YC8.3	C.cajan_37393	KQ483877.1	65075	73962
Vradi08g04460	MQTLLG8-1	PHAVU_008G105400g	8	12052421	12059661	MQTL-YC8.3	C.cajan_37393	KQ483877.1	65075	73962
Vradi08g04470	MQTLLG8-1	PHAVU_008G105500g	8	12064455	12065799	MQTL-YC8.3	C.cajan_37396	KQ483877.1	110967	112175
Vradi08g04470	MQTLLG8-1	PHAVU_008G105500g	8	12064455	12065799	MQTL-YC8.3	C.cajan_37397	KQ483877.1	120020	120643
Vradi08g04480	MQTLLG8-1	PHAVU_008G097500g	8	10169820	10173372	MQTL-YC8.3	C.cajan_37400	KQ483877.1	138964	142047
Vradi08g04480	MQTLLG8-1	PHAVU_008G105600g	8	12071200	12074319	MQTL-YC8.3	C.cajan_37400	KQ483877.1	138964	142047
Vradi08g04480	MQTLLG8-1	PHAVU_008G118500g	8	14935813	14938949	MQTL-YC8.3	C.cajan_37400	KQ483877.1	138964	142047
Vradi08g04490	MQTLLG8-1	PHAVU_008G1050000g	8	11981979	11983104	MQTL-YC8.3	C.cajan_17578	7	2722493	2724204
Vradi08g04500	MQTLLG8-1	PHAVU_008G104900g	8	11970519	11973727	MQTL-YC8.3	C.cajan_17579	7	2725967	2728193
Vradi08g04510	MQTLLG8-1	PHAVU_008G104800g	8	11951817	11960592	MQTL-YC8.3	C.cajan_17580	7	2741336	2753728
Vradi08g04520	MQTLLG8-1	PHAVU_008G1047001g	8	11934246	11936523	MQTL-YC8.3	C.cajan_17581	7	2767418	2777312
Vradi08g04520	MQTLLG8-1	PHAVU_008G1047000g	8	11941874	11943103	MQTL-YC8.3	C.cajan_17581	7	2767418	2777312
Vradi08g04530	MQTLLG8-1
Vradi08g04540	MQTLLG8-1	PHAVU_008G104600g	8	11927449	11932217	MQTL-YC8.3	C.cajan_17582	7	2777951	2782442
Vradi08g04550	MQTLLG8-1	PHAVU_008G104500g	8	11900393	11904283	MQTL-YC8.3	C.cajan_17583	7	2795079	2798488
Vradi08g04560	MQTLLG8-1	PHAVU_008G104400g	8	11863113	11868802	MQTL-YC8.3	C.cajan_17584	7	2818610	2825335
Vradi08g04560	MQTLLG8-1	PHAVU_008G104400g	8	11863113	11868802	MQTL-YC8.3	C.cajan_17584	7	2818610	2825335
Vradi08g04570	MQTLLG8-1	PHAVU_008G104100g	8	11807331	11809136	MQTL-YC8.3	C.cajan_17589	7	2851303	2854446
Vradi08g04580	MQTLLG8-1	PHAVU_008G103900g	8	11762200	11764198	MQTL-YC8.3	C.cajan_06113	2	17095281	17096672
Vradi08g04590	MQTLLG8-1	PHAVU_008G1040001g	8	11766295	11776745	MQTL-YC8.3
Vradi08g04590	MQTLLG8-1	PHAVU_008G1040000g	8	11782477	11784673	MQTL-YC8.3
Vradi08g04590	MQTLLG8-1	PHAVU_008G1040001g	8	11766295	11776745	MQTL-YC8.3
Vradi08g04590	MQTLLG8-1	PHAVU_008G1040000g	8	11782477	11784673	MQTL-YC8.3
Vradi08g04600	MQTLLG8-1
Vradi08g04610	MQTLLG8-1
Vradi08g04620	MQTLLG8-1						C.cajan_17591	7	2898312	2902970
Vradi08g04630	MQTLLG8-1						C.cajan_17591	7	2898312	2902970
Vradi08g04640	MQTLLG8-1	PHAVU_011G016200g	11	1270147	1271173	MQTL-YC11.1	C.cajan_21101	4	2308227	2308601	CC_MQTL4.5
Vradi08g04640	MQTLLG8-1	PHAVU_011G016100g	11	1267957	1269043	MQTL-YC11.1	C.cajan_21101	4	2308227	2308601	CC_MQTL4.5
Vradi08g04650	MQTLLG8-1	PHAVU_008G103700g	8	11717713	11721635	MQTL-YC8.3	C.cajan_17597	7	2931640	2934900
Vradi08g04650	MQTLLG8-1	PHAVU_008G103700g	8	11717713	11721635	MQTL-YC8.3	C.cajan_17592	7	2906946	2909602
Vradi08g04660	MQTLLG8-1	PHAVU_008G103600g	8	11699393	11701785	MQTL-YC8.3	C.cajan_38246	KQ484444.1	14991	17675
Vradi08g04670	MQTLLG8-1	PHAVU_007G235100g	7	47581714	47582823		C.cajan_27032	KQ483448.1	37076	38224
Vradi08g04680	MQTLLG8-1	PHAVU_007G234900g	7	47559832	47574164		C.cajan_22111	9	78147	81913
Vradi08g04680	MQTLLG8-1	PHAVU_007G234900g	7	47559832	47574164		C.cajan_22112	9	85156	90588
Vradi08g04690	MQTLLG8-1	PHAVU_007G235000g	7	47576091	47580901		C.cajan_22110	9	62846	68255
Vradi08g04700	MQTLLG8-1	PHAVU_007G234800g	7	47549376	47550100		C.cajan_36024	KQ483579.1	277066	277644
Vradi08g04710	MQTLLG8-1	PHAVU_007G234700g	7	47534396	47537571		C.cajan_06094	2	16845966	16848778
Vradi08g04720	MQTLLG8-1	PHAVU_007G234500g	7	47482046	47492502		C.cajan_06097	2	16898494	16912381
Vradi08g04730	MQTLLG8-1	PHAVU_007G234400g	7	47475635	47478472
Vradi08g04740	MQTLLG8-1	PHAVU_007G234300g	7	47467797	47473483		C.cajan_06100	2	16929387	16934648
Vradi08g04750	MQTLLG8-1	PHAVU_007G234200g	7	47458454	47461636		C.cajan_06102	2	16948889	16949911
Vradi08g05330	MQTLLG8-2	PHAVU_007G221700g	7	46110997	46119797		C.cajan_37590	KQ483768.1	97684	100125
Vradi08g05340	MQTLLG8-2	PHAVU_007G220000g	7	45942140	45942844
Vradi08g05350	MQTLLG8-2
Vradi08g05360	MQTLLG8-2	PHAVU_007G220200g	7	45957836	45959359		C.cajan_08696	3	6756158	6756670
Vradi08g05370	MQTLLG8-2
Vradi08g05380	MQTLLG8-2
Vradi08g05390	MQTLLG8-2	PHAVU_007G230300g	7	47033127	47036968
Vradi08g05400	MQTLLG8-2	PHAVU_011G201600g	11	47990495	47996233		C.cajan_11914	6	9402118	9405005
Vradi08g05400	MQTLLG8-2	PHAVU_011G201600g	11	47990495	47996233		C.cajan_06708	2	23912090	23914467
Vradi08g05410	MQTLLG8-2	PHAVU_011G201700g	11	47999023	48003072		C.cajan_42769	KQ484617.1	2340	7306
Vradi08g05410	MQTLLG8-2	PHAVU_011G202500g	11	48078224	48082408		C.cajan_42769	KQ484617.1	2340	7306
Vradi08g05410	MQTLLG8-2	PHAVU_011G202000g	11	48012047	48018560		C.cajan_42769	KQ484617.1	2340	7306
Vradi08g05410	MQTLLG8-2	PHAVU_011G200700g	11	47836160	47838884		C.cajan_42769	KQ484617.1	2340	7306
Vradi08g05420	MQTLLG8-2	PHAVU_007G230100g	7	47005640	47009245		C.cajan_06561	2	22015534	22018425
Vradi08g05430	MQTLLG8-2	PHAVU_007G229800g	7	46980481	46994877
Vradi08g05430	MQTLLG8-2	PHAVU_011G176600g	11	45134053	45146869
Vradi08g05440	MQTLLG8-2	PHAVU_007G229700g	7	46972268	46973992
Vradi08g05450	MQTLLG8-2	PHAVU_007G229600g	7	46961712	46964555		C.cajan_36518	KQ483818.1	17300	20155
Vradi08g05460	MQTLLG8-2
Vradi08g05470	MQTLLG8-2	PHAVU_007G229500g	7	46956351	46957257		C.cajan_36520	KQ483818.1	37134	37817
Vradi08g05480	MQTLLG8-2	PHAVU_007G229400g	7	46949899	46954128		C.cajan_36521	KQ483818.1	40347	44406
Vradi08g05490	MQTLLG8-2	PHAVU_007G229300g	7	46932024	46933178		C.cajan_36529	KQ483818.1	134613	135929
Vradi08g05500	MQTLLG8-2	PHAVU_007G229200g	7	46925777	46926242		C.cajan_35709	KQ483712.1	75087	75446
Vradi08g05510	MQTLLG8-2	PHAVU_007G229100g	7	46916957	46922700		C.cajan_35710	KQ483712.1	83161	89892
Vradi08g05510	MQTLLG8-2	PHAVU_007G229100g	7	46916957	46922700		C.cajan_35710	KQ483712.1	83161	89892
Vradi08g05520	MQTLLG8-2	PHAVU_007G229000g	7	46904956	46906179		C.cajan_35711	KQ483712.1	97649	97876
Vradi08g05530	MQTLLG8-2						C.cajan_31500	KQ483525.1	301866	302492
Vradi08g05540	MQTLLG8-2	PHAVU_007G228900g	7	46883091	46884642		C.cajan_35720	KQ483712.1	218912	219400
Vradi08g05550	MQTLLG8-2
Vradi08g05560	MQTLLG8-2	PHAVU_007G228700g	7	46848552	46848863		C.cajan_35723	KQ483712.1	250502	250813
Vradi08g05570	MQTLLG8-2	PHAVU_007G2286001g	7	46840398	46841511		C.cajan_42971	KQ484307.1	14888	18365
Vradi08g05580	MQTLLG8-2	PHAVU_007G228000g	7	46777421	46780818
Vradi08g05580	MQTLLG8-2	PHAVU_007G228200g	7	46793886	46799141
Vradi08g05580	MQTLLG8-2	PHAVU_007G2281001g	7	46782908	46786690
Vradi08g05580	MQTLLG8-2	PHAVU_007G228300g	7	46810659	46815594
Vradi08g05580	MQTLLG8-2	PHAVU_007G228400g	7	46818666	46823512
Vradi08g05580	MQTLLG8-2	PHAVU_007G227900g	7	46766432	46771739
Vradi08g05580	MQTLLG8-2	PHAVU_007G228500g	7	46828537	46835429
Vradi08g05590	MQTLLG8-2
Vradi08g05600	MQTLLG8-2
Vradi08g05610	MQTLLG8-2	PHAVU_007G228000g	7	46777421	46780818
Vradi08g05610	MQTLLG8-2	PHAVU_007G228200g	7	46793886	46799141
Vradi08g05610	MQTLLG8-2	PHAVU_007G2281001g	7	46782908	46786690
Vradi08g05610	MQTLLG8-2	PHAVU_007G228300g	7	46810659	46815594
Vradi08g05610	MQTLLG8-2	PHAVU_007G228400g	7	46818666	46823512
Vradi08g05610	MQTLLG8-2	PHAVU_007G227900g	7	46766432	46771739
Vradi08g05610	MQTLLG8-2	PHAVU_007G228500g	7	46828537	46835429
Vradi08g05620	MQTLLG8-2	PHAVU_007G228000g	7	46777421	46780818
Vradi08g05620	MQTLLG8-2	PHAVU_007G228200g	7	46793886	46799141
Vradi08g05620	MQTLLG8-2	PHAVU_007G2281001g	7	46782908	46786690
Vradi08g05620	MQTLLG8-2	PHAVU_007G228300g	7	46810659	46815594
Vradi08g05620	MQTLLG8-2	PHAVU_007G228400g	7	46818666	46823512
Vradi08g05620	MQTLLG8-2	PHAVU_007G227900g	7	46766432	46771739
Vradi08g05620	MQTLLG8-2	PHAVU_007G228500g	7	46828537	46835429
Vradi08g05630	MQTLLG8-2	PHAVU_007G228000g	7	46777421	46780818
Vradi08g05630	MQTLLG8-2	PHAVU_007G228200g	7	46793886	46799141
Vradi08g05630	MQTLLG8-2	PHAVU_007G2281001g	7	46782908	46786690
Vradi08g05630	MQTLLG8-2	PHAVU_007G228300g	7	46810659	46815594
Vradi08g05630	MQTLLG8-2	PHAVU_007G228400g	7	46818666	46823512
Vradi08g05630	MQTLLG8-2	PHAVU_007G227900g	7	46766432	46771739
Vradi08g05630	MQTLLG8-2	PHAVU_007G228500g	7	46828537	46835429
Vradi08g05640	MQTLLG8-2	PHAVU_007G228000g	7	46777421	46780818
Vradi08g05640	MQTLLG8-2	PHAVU_007G228200g	7	46793886	46799141
Vradi08g05640	MQTLLG8-2	PHAVU_007G2281001g	7	46782908	46786690
Vradi08g05640	MQTLLG8-2	PHAVU_007G228300g	7	46810659	46815594
Vradi08g05640	MQTLLG8-2	PHAVU_007G228400g	7	46818666	46823512
Vradi08g05640	MQTLLG8-2	PHAVU_007G227900g	7	46766432	46771739
Vradi08g05640	MQTLLG8-2	PHAVU_007G228500g	7	46828537	46835429
Vradi08g05650	MQTLLG8-2	PHAVU_007G228000g	7	46777421	46780818
Vradi08g05650	MQTLLG8-2	PHAVU_007G228200g	7	46793886	46799141
Vradi08g05650	MQTLLG8-2	PHAVU_007G2281001g	7	46782908	46786690
Vradi08g05650	MQTLLG8-2	PHAVU_007G228300g	7	46810659	46815594
Vradi08g05650	MQTLLG8-2	PHAVU_007G228400g	7	46818666	46823512
Vradi08g05650	MQTLLG8-2	PHAVU_007G227900g	7	46766432	46771739
Vradi08g05650	MQTLLG8-2	PHAVU_007G228500g	7	46828537	46835429
Vradi08g05660	MQTLLG8-2	PHAVU_007G228000g	7	46777421	46780818
Vradi08g05660	MQTLLG8-2	PHAVU_007G228200g	7	46793886	46799141
Vradi08g05660	MQTLLG8-2	PHAVU_007G2281001g	7	46782908	46786690
Vradi08g05660	MQTLLG8-2	PHAVU_007G228300g	7	46810659	46815594
Vradi08g05660	MQTLLG8-2	PHAVU_007G228400g	7	46818666	46823512
Vradi08g05660	MQTLLG8-2	PHAVU_007G227900g	7	46766432	46771739
Vradi08g05660	MQTLLG8-2	PHAVU_007G228500g	7	46828537	46835429
Vradi08g05670	MQTLLG8-2	PHAVU_007G228000g	7	46777421	46780818
Vradi08g05670	MQTLLG8-2	PHAVU_007G228200g	7	46793886	46799141
Vradi08g05670	MQTLLG8-2	PHAVU_007G2281001g	7	46782908	46786690
Vradi08g05670	MQTLLG8-2	PHAVU_007G228300g	7	46810659	46815594
Vradi08g05670	MQTLLG8-2	PHAVU_007G228400g	7	46818666	46823512
Vradi08g05670	MQTLLG8-2	PHAVU_007G227900g	7	46766432	46771739
Vradi08g05670	MQTLLG8-2	PHAVU_007G228500g	7	46828537	46835429
Vradi08g05680	MQTLLG8-2	PHAVU_007G2286001g	7	46840398	46841511		C.cajan_42971	KQ484307.1	14888	18365
Vradi08g05690	MQTLLG8-2	PHAVU_007G228700g	7	46848552	46848863		C.cajan_35723	KQ483712.1	250502	250813
Vradi08g05700	MQTLLG8-2	PHAVU_007G227800g	7	46753906	46760005
Vradi08g05710	MQTLLG8-2	PHAVU_007G227800g	7	46753906	46760005
Vradi08g05720	MQTLLG8-2
Vradi08g05730	MQTLLG8-2	PHAVU_011G119600g	11	19940924	19945536		C.cajan_34536	KQ483622.1	107207	111165
Vradi08g05730	MQTLLG8-2	PHAVU_010G107600g	10	36777854	36783107		C.cajan_34536	KQ483622.1	107207	111165
Vradi08g05730	MQTLLG8-2	PHAVU_011G119600g	11	19940924	19945536		C.cajan_34536	KQ483622.1	107207	111165
Vradi08g05730	MQTLLG8-2	PHAVU_010G107600g	10	36777854	36783107		C.cajan_34536	KQ483622.1	107207	111165
Vradi08g05730	MQTLLG8-2	PHAVU_011G119600g	11	19940924	19945536		C.cajan_34536	KQ483622.1	107207	111165
Vradi08g05730	MQTLLG8-2	PHAVU_010G107600g	10	36777854	36783107		C.cajan_34536	KQ483622.1	107207	111165
Vradi08g05740	MQTLLG8-2	PHAVU_007G227700g	7	46735189	46742277		C.cajan_43085	KQ484276.1	74626	81294
Vradi08g05740	MQTLLG8-2	PHAVU_007G227700g	7	46735189	46742277		C.cajan_47493	KQ484502.1	43014	51651
Vradi08g05740	MQTLLG8-2	PHAVU_007G227700g	7	46735189	46742277		C.cajan_07900	2	35833480	35841132
Vradi08g05740	MQTLLG8-2	PHAVU_007G227700g	7	46735189	46742277		C.cajan_35719	KQ483712.1	182833	191105
Vradi08g05740	MQTLLG8-2	PHAVU_007G227700g	7	46735189	46742277		C.cajan_35718	KQ483712.1	170871	177006
Vradi08g05740	MQTLLG8-2	PHAVU_007G227700g	7	46735189	46742277		C.cajan_45082	KQ484607.1	47075	48112
Vradi08g05750	MQTLLG8-2	PHAVU_007G227700g	7	46735189	46742277		C.cajan_43085	KQ484276.1	74626	81294
Vradi08g05750	MQTLLG8-2	PHAVU_007G227700g	7	46735189	46742277		C.cajan_47493	KQ484502.1	43014	51651
Vradi08g05750	MQTLLG8-2	PHAVU_007G227700g	7	46735189	46742277		C.cajan_07900	2	35833480	35841132
Vradi08g05750	MQTLLG8-2	PHAVU_007G227700g	7	46735189	46742277		C.cajan_35719	KQ483712.1	182833	191105
Vradi08g05750	MQTLLG8-2	PHAVU_007G227700g	7	46735189	46742277		C.cajan_35718	KQ483712.1	170871	177006
Vradi08g05750	MQTLLG8-2	PHAVU_007G227700g	7	46735189	46742277		C.cajan_45082	KQ484607.1	47075	48112
Vradi08g05760	MQTLLG8-2
Vradi08g05770	MQTLLG8-2	PHAVU_007G227600g	7	46725293	46733070		C.cajan_43962	AGCT01070020.1	22421	27093
Vradi08g05780	MQTLLG8-2	PHAVU_007G160800g	7	38882796	38883410	MQTL-YC7.5	C.cajan_42746	KQ484829.1	15928	16329
Vradi08g05790	MQTLLG8-2
Vradi08g05800	MQTLLG8-2
Vradi08g05810	MQTLLG8-2	PHAVU_007G227500g	7	46720876	46721642
Vradi08g05820	MQTLLG8-2	PHAVU_007G227400g	7	46710197	46718428		C.cajan_32394	KQ483596.1	234405	240980
Vradi08g05830	MQTLLG8-2	PHAVU_007G227300g	7	46703048	46706494		C.cajan_42913	KQ484561.1	8891	10874
Vradi08g05840	MQTLLG8-2						C.cajan_24923	KQ483423.1	187110	188711
Vradi08g05850	MQTLLG8-2
Vradi08g05860	MQTLLG8-2	PHAVU_007G223800g	7	46343343	46349901		C.cajan_06267	2	18723944	18729038
Vradi08g05870	MQTLLG8-2						C.cajan_15773	8	4431771	4432490	CC_MQTL8.3
Vradi08g05880	MQTLLG8-2	PHAVU_007G223900g	7	46387090	46391549
Vradi08g05890	MQTLLG8-2	PHAVU_011G193700g	11	47021910	47022877		C.cajan_02806	11	30925204	30929197
Vradi08g05890	MQTLLG8-2	PHAVU_011G193300g	11	46981720	46983546		C.cajan_02806	11	30925204	30929197
Vradi08g05900	MQTLLG8-2	PHAVU_007G224000g	7	46395761	46398281		C.cajan_06261	2	18620089	18621672
Vradi08g05910	MQTLLG8-2	PHAVU_007G224100g	7	46400244	46405414		C.cajan_06260	2	18613446	18618615
Vradi08g05920	MQTLLG8-2
Vradi08g05930	MQTLLG8-2
Vradi08g05940	MQTLLG8-2	PHAVU_007G224300g	7	46423755	46426372		C.cajan_06253	2	18557997	18559589
Vradi08g05950	MQTLLG8-2	PHAVU_007G224400g	7	46426949	46431628		C.cajan_06252	2	18552680	18556876
Vradi08g05960	MQTLLG8-2	PHAVU_007G224500g	7	46436594	46445378		C.cajan_06251	2	18531585	18539459
Vradi08g05970	MQTLLG8-2	PHAVU_007G224600g	7	46446750	46448842		C.cajan_06248	2	18514503	18515855
Vradi08g05980	MQTLLG8-2	PHAVU_007G224700g	7	46452067	46456176
Vradi08g05990	MQTLLG8-2	PHAVU_007G224800g	7	46465483	46467655		C.cajan_06184	2	17822684	17824818
Vradi08g06000	MQTLLG8-2	PHAVU_007G224900g	7	46477408	46479311
Vradi08g06010	MQTLLG8-2	PHAVU_007G225000g	7	46480232	46489492
Vradi08g06020	MQTLLG8-2	PHAVU_007G225000g	7	46480232	46489492
Vradi08g06030	MQTLLG8-2	PHAVU_007G225100g	7	46491070	46494471		C.cajan_06186	2	17855508	17858706
Vradi08g06040	MQTLLG8-2	PHAVU_007G225200g	7	46501431	46503473
Vradi08g06050	MQTLLG8-2
Vradi08g06060	MQTLLG8-2	PHAVU_007G225300g	7	46507266	46511053		C.cajan_06191	2	17909230	17915554
Vradi08g06070	MQTLLG8-2
Vradi08g06080	MQTLLG8-2	PHAVU_007G225400g	7	46518578	46523721		C.cajan_06192	2	17931630	17935585
Vradi08g06090	MQTLLG8-2	PHAVU_007G225500g	7	46530983	46532642		C.cajan_06195	2	17966913	17968199
Vradi08g06100	MQTLLG8-2	PHAVU_007G225600g	7	46535441	46539231		C.cajan_06196	2	17970261	17973768
Vradi08g06110	MQTLLG8-2						C.cajan_06197	2	17974276	17982030
Vradi08g06120	MQTLLG8-2	PHAVU_007G225700g	7	46541051	46545475
Vradi08g06130	MQTLLG8-2	PHAVU_007G225800g	7	46552194	46555182		C.cajan_45448	KQ484349.1	34307	36139
Vradi08g06140	MQTLLG8-2	PHAVU_007G225900g	7	46556014	46561163		C.cajan_06199	2	17984043	17988288
Vradi08g06150	MQTLLG8-2	PHAVU_007G226000g	7	46567764	46570265		C.cajan_06200	2	17995542	17997989
Vradi08g06160	MQTLLG8-2						C.cajan_48167	AGCT01020653.1	123	428
Vradi08g06160	MQTLLG8-2						C.cajan_13966	10	6580350	6581020
Vradi08g06170	MQTLLG8-2	PHAVU_007G226200g	7	46579686	46581759		C.cajan_09932	3	19483462	19484494
Vradi08g06180	MQTLLG8-2
Vradi08g06190	MQTLLG8-2	PHAVU_007G226300g	7	46587028	46589119		C.cajan_33344	KQ483692.1	205127	206815
Vradi08g06200	MQTLLG8-2
Vradi08g06210	MQTLLG8-2	PHAVU_007G226400g	7	46599354	46601900		C.cajan_33341	KQ483692.1	173296	175779
Vradi08g06220	MQTLLG8-2	PHAVU_007G2265001g	7	46604475	46608336		C.cajan_33339	KQ483692.1	150577	158651
Vradi08g06220	MQTLLG8-2	PHAVU_007G2265000g	7	46610063	46612792		C.cajan_33339	KQ483692.1	150577	158651
Vradi08g06230	MQTLLG8-2	PHAVU_007G226600g	7	46615520	46625885		C.cajan_33337	KQ483692.1	135962	143723
Vradi08g06240	MQTLLG8-2	PHAVU_007G226700g	7	46633601	46645072		C.cajan_33335	KQ483692.1	107133	110767
Vradi08g06250	MQTLLG8-2	PHAVU_007G226800g	7	46657825	46661266		C.cajan_06386	2	20171910	20175311
Vradi08g06260	MQTLLG8-2
Vradi08g06270	MQTLLG8-2	PHAVU_007G226900g	7	46664388	46668225		C.cajan_32378	KQ483596.1	6398	10619
Vradi08g06280	MQTLLG8-2	PHAVU_007G227000g	7	46669879	46674946		C.cajan_02743	11	30103449	30103961
Vradi08g06290	MQTLLG8-2
Vradi08g06300	MQTLLG8-2						C.cajan_12136	6	11567417	11568094
Vradi08g06310	MQTLLG8-2
Vradi08g06320	MQTLLG8-2	PHAVU_007G164700g	7	39431337	39434624	MQTL-YC7.5	C.cajan_05638	2	12278822	12280714
Vradi08g06320	MQTLLG8-2	PHAVU_007G164700g	7	39431337	39434624	MQTL-YC7.5	C.cajan_23058	9	10289032	10292361
Vradi08g06330	MQTLLG8-2
Vradi08g06340	MQTLLG8-2
Vradi08g06350	MQTLLG8-2
Vradi08g06360	MQTLLG8-2
Vradi08g06370	MQTLLG8-2
Vradi08g06380	MQTLLG8-2	PHAVU_008G290100g	8	59333334	59336378
Vradi08g06380	MQTLLG8-2	PHAVU_008G290100g	8	59333334	59336378
Vradi08g06390	MQTLLG8-2	PHAVU_007G164500g	7	39403814	39408566	MQTL-YC7.5	C.cajan_04203	11	45933226	45939128
Vradi08g06400	MQTLLG8-2
Vradi08g06410	MQTLLG8-2						C.cajan_39456	KQ484298.1	19108	21243
Vradi08g06420	MQTLLG8-2
Vradi08g06430	MQTLLG8-2
Vradi08g06440	MQTLLG8-2
Vradi08g06450	MQTLLG8-2	PHAVU_006G202600g	6	30671510	30674584		C.cajan_17114	8	18731223	18734496
Vradi08g06460	MQTLLG8-2
Vradi08g06470	MQTLLG8-2	PHAVU_007G223700g	7	46329611	46337063		C.cajan_06269	2	18751826	18759300
Vradi08g06480	MQTLLG8-2	PHAVU_007G223600g	7	46315507	46326863		C.cajan_24856	KQ483416.1	495961	496789
Vradi08g06480	MQTLLG8-2	PHAVU_007G223600g	7	46315507	46326863		C.cajan_06271	2	18782177	18794551
Vradi08g06490	MQTLLG8-2	PHAVU_007G223500g	7	46296278	46305489		C.cajan_06275	2	18818315	18826410
Vradi08g06490	MQTLLG8-2	PHAVU_007G223500g	7	46296278	46305489		C.cajan_06275	2	18818315	18826410
Vradi08g06500	MQTLLG8-2
Vradi08g06510	MQTLLG8-2	PHAVU_007G223300g	7	46287193	46290037		C.cajan_06277	2	18838045	18840106
Vradi08g06520	MQTLLG8-2	PHAVU_007G223200g	7	46274488	46282303
Vradi08g06530	MQTLLG8-2	PHAVU_007G223000g	7	46267018	46269934		C.cajan_06280	2	18859226	18861944
Vradi08g06540	MQTLLG8-2	PHAVU_007G222900g	7	46260709	46262601		C.cajan_06281	2	18870555	18871712
Vradi08g06550	MQTLLG8-2	PHAVU_007G222800g	7	46249338	46253082		C.cajan_06286	2	18894624	18897546
Vradi08g06560	MQTLLG8-2	PHAVU_008G013800g	8	1225467	1226321		C.cajan_25863	KQ483449.1	403301	404128
Vradi08g06570	MQTLLG8-2
Vradi08g06580	MQTLLG8-2	PHAVU_007G152300g	7	37432466	37437256	MQTL-YC7.5
Vradi08g06590	MQTLLG8-2	PHAVU_007G152900g	7	37570496	37571762	MQTL-YC7.5	C.cajan_06368	2	19980188	19980959
Vradi08g06600	MQTLLG8-2	PHAVU_007G152500g	7	37453073	37463275	MQTL-YC7.5	C.cajan_06237	2	18323162	18337995
Vradi08g06600	MQTLLG8-2	PHAVU_007G152500g	7	37453073	37463275	MQTL-YC7.5	C.cajan_06232	2	18270218	18281410
Vradi08g06600	MQTLLG8-2	PHAVU_007G152500g	7	37453073	37463275	MQTL-YC7.5	C.cajan_06224	2	18174577	18191876
Vradi08g06610	MQTLLG8-2	PHAVU_011G008200g	11	605283	606280	MQTL-YC11.1	C.cajan_44120	KQ484998.1	13592	14623
Vradi08g06610	MQTLLG8-2	PHAVU_011G008200g	11	605283	606280	MQTL-YC11.1	C.cajan_37366	KQ483854.1	99654	105678
Vradi08g06610	MQTLLG8-2	PHAVU_011G008200g	11	605283	606280	MQTL-YC11.1	C.cajan_11822	6	8430714	8432495
Vradi08g06620	MQTLLG8-2	PHAVU_007G152600g	7	37487580	37491669	MQTL-YC7.5	C.cajan_32389	KQ483596.1	173715	178370
Vradi08g06630	MQTLLG8-4	PHAVU_007G152700g	7	37506659	37507490	MQTL-YC7.5	C.cajan_32387	KQ483596.1	153584	154450
Vradi08g06640	MQTLLG8-4	PHAVU_007G1618000g	7	39013598	39016328	MQTL-YC7.5	C.cajan_39541	KQ484080.1	47806	53043
Vradi08g06640	MQTLLG8-4	PHAVU_007G1618001g	7	39007368	39009691	MQTL-YC7.5	C.cajan_39541	KQ484080.1	47806	53043
Vradi08g06650	MQTLLG8-4
Vradi08g06840	MQTLLG8-3						C.cajan_29028	KQ483442.1	625489	625998
Vradi08g06850	MQTLLG8-3	PHAVU_007G1926000g	7	43020284	43023853		C.cajan_34799	KQ483634.1	277204	289663
Vradi08g06850	MQTLLG8-3	PHAVU_007G1926001g	7	43007508	43017035		C.cajan_34799	KQ483634.1	277204	289663
Vradi08g06850	MQTLLG8-3	PHAVU_007G1926000g	7	43020284	43023853		C.cajan_34799	KQ483634.1	277204	289663
Vradi08g06850	MQTLLG8-3	PHAVU_007G1926001g	7	43007508	43017035		C.cajan_34799	KQ483634.1	277204	289663
Vradi08g06860	MQTLLG8-3	PHAVU_007G193700g	7	43194246	43194881		C.cajan_34782	KQ483634.1	28980	29609
Vradi08g06870	MQTLLG8-3	PHAVU_007G194000g	7	43245515	43247447
Vradi08g06880	MQTLLG8-3	PHAVU_007G194100g	7	43248733	43250390		C.cajan_29019	KQ483442.1	467367	468404
Vradi08g06890	MQTLLG8-3	PHAVU_007G194200g	7	43251956	43256166
Vradi08g06900	MQTLLG8-3	PHAVU_007G194300g	7	43257363	43263137		C.cajan_29017	KQ483442.1	434672	439853
Vradi08g06910	MQTLLG8-3	PHAVU_007G194400g	7	43265255	43268528		C.cajan_29016	KQ483442.1	421370	423981
Vradi08g06920	MQTLLG8-3	PHAVU_007G194500g	7	43268703	43270915
Vradi08g06930	MQTLLG8-3	PHAVU_007G194600g	7	43284033	43290243		C.cajan_29015	KQ483442.1	387418	393769
Vradi08g06940	MQTLLG8-3	PHAVU_007G194800g	7	43293543	43295859		C.cajan_29011	KQ483442.1	360493	362485
Vradi08g06950	MQTLLG8-3
Vradi08g06950	MQTLLG8-3
Vradi08g06950	MQTLLG8-3
Vradi08g06960	MQTLLG8-3	PHAVU_008G093700g	8	9621458	9624278	MQTL-YC8.3	C.cajan_17777	7	4787388	4789797
Vradi08g06970	MQTLLG8-3	PHAVU_007G147900g	7	36557852	36559520	MQTL-YC7.5	C.cajan_46231	KQ484576.1	15838	17582
Vradi08g06980	MQTLLG8-3	PHAVU_007G147800g	7	36525343	36532962	MQTL-YC7.5	C.cajan_08684	3	6625777	6632462
Vradi08g06990	MQTLLG8-3	PHAVU_007G147600g	7	36515958	36518034	MQTL-YC7.5	C.cajan_43368	KQ484598.1	40655	42122
Vradi08g07000	MQTLLG8-3	PHAVU_007G147500g	7	36504778	36508088	MQTL-YC7.5	C.cajan_43366	KQ484598.1	25720	32977
Vradi08g07010	MQTLLG8-3	PHAVU_003G032700g	3	3199675	3202609		C.cajan_23616	KQ483411.1	832375	836435
Vradi08g07020	MQTLLG8-3
Vradi08g07030	MQTLLG8-3
Vradi08g07040	MQTLLG8-3	PHAVU_007G147400g	7	36420257	36427243	MQTL-YC7.5	C.cajan_40751	KQ483989.1	110151	116873
Vradi08g07050	MQTLLG8-3
Vradi08g07060	MQTLLG8-3	PHAVU_007G150400g	7	36980985	36987870	MQTL-YC7.5	C.cajan_12911	6	19760574	19766623
Vradi08g07070	MQTLLG8-3	PHAVU_007G150300g	7	36947919	36952701	MQTL-YC7.5	C.cajan_12914	6	19790862	19794554
Vradi08g07070	MQTLLG8-3	PHAVU_010G070000g	10	18146955	18148066		C.cajan_12914	6	19790862	19794554
Vradi08g07080	MQTLLG8-3	PHAVU_007G150200g	7	36913987	36914355	MQTL-YC7.5	C.cajan_12915	6	19805205	19805579
Vradi08g07090	MQTLLG8-3	PHAVU_007G150100g	7	36900309	36909852	MQTL-YC7.5	C.cajan_12916	6	19812195	19816887
Vradi08g07100	MQTLLG8-3	PHAVU_007G150000g	7	36876260	36887231	MQTL-YC7.5	C.cajan_12918	6	19843419	19853680
Vradi08g07110	MQTLLG8-3	PHAVU_007G149900g	7	36870936	36875031	MQTL-YC7.5
Vradi08g07120	MQTLLG8-3	PHAVU_007G149800g	7	36862603	36867513	MQTL-YC7.5	C.cajan_12920	6	19886422	19890351
Vradi08g07130	MQTLLG8-3	PHAVU_007G149700g	7	36854790	36855610	MQTL-YC7.5	C.cajan_12924	6	19911854	19912249
Vradi08g07140	MQTLLG8-3	PHAVU_007G149600g	7	36816779	36822277	MQTL-YC7.5	C.cajan_12926	6	19920358	19925078
Vradi08g07150	MQTLLG8-3	PHAVU_L002400g	scaffold_25	1	1332		C.cajan_27868	KQ483482.1	192591	196587
Vradi08g07150	MQTLLG8-3	PHAVU_007G149400g	7	36797748	36802083	MQTL-YC7.5	C.cajan_27868	KQ483482.1	192591	196587
Vradi08g07160	MQTLLG8-3	PHAVU_L002400g	scaffold_25	1	1332		C.cajan_27868	KQ483482.1	192591	196587
Vradi08g07160	MQTLLG8-3	PHAVU_007G149400g	7	36797748	36802083	MQTL-YC7.5	C.cajan_27868	KQ483482.1	192591	196587
Vradi08g07170	MQTLLG8-3	PHAVU_007G149100g	7	36767104	36768616	MQTL-YC7.5	C.cajan_27865	KQ483482.1	174777	176127
Vradi08g07180	MQTLLG8-3	PHAVU_007G219900g	7	45931461	45933610		C.cajan_27864	KQ483482.1	167651	169437
Vradi08g07190	MQTLLG8-3	PHAVU_007G219800g	7	45927968	45930238		C.cajan_27863	KQ483482.1	162952	165611
Vradi08g07200	MQTLLG8-3	PHAVU_008G170100g	8	44385577	44388615	MQTL-YC8.3	C.cajan_31480	KQ483525.1	2202	3548
Vradi08g07210	MQTLLG8-3
Vradi08g07220	MQTLLG8-3
Vradi08g07230	MQTLLG8-3	PHAVU_008G170200g	8	44423423	44428782	MQTL-YC8.3	C.cajan_04968	2	5260484	5265896
Vradi08g07240	MQTLLG8-3	PHAVU_008G170300g	8	44439237	44443537	MQTL-YC8.3	C.cajan_04969	2	5270357	5277319
Vradi08g07240	MQTLLG8-3	PHAVU_008G170300g	8	44439237	44443537	MQTL-YC8.3	C.cajan_04969	2	5270357	5277319
Vradi08g07250	MQTLLG8-3	PHAVU_011G190600g	11	46743546	46750687		C.cajan_38775	KQ483950.1	87654	94518
Vradi08g07260	MQTLLG8-3
Vradi08g07270	MQTLLG8-3	PHAVU_011G190400g	11	46720263	46729516		C.cajan_38779	KQ483950.1	143219	146664
Vradi08g07280	MQTLLG8-3	PHAVU_011G190300g	11	46701010	46709778		C.cajan_38768	KQ483950.1	4702	8263
Vradi08g07290	MQTLLG8-3	PHAVU_011G190200g	11	46694239	46696240		C.cajan_37070	KQ483793.1	202351	204354
Vradi08g07290	MQTLLG8-3	PHAVU_011G190200g	11	46694239	46696240		C.cajan_37056	KQ483793.1	36022	38025
Vradi08g07290	MQTLLG8-3	PHAVU_011G190200g	11	46694239	46696240		C.cajan_37066	KQ483793.1	167472	169169
Vradi08g07300	MQTLLG8-3
Vradi08g07310	MQTLLG8-3	PHAVU_011G174500g	11	44840850	44843342		C.cajan_01479	11	16116435	16117865
Vradi08g07320	MQTLLG8-3
Vradi08g07330	MQTLLG8-3	PHAVU_011G189900g	11	46667767	46673526		C.cajan_37064	KQ483793.1	137353	143642
Vradi08g07330	MQTLLG8-3	PHAVU_011G189900g	11	46667767	46673526		C.cajan_32257	KQ483555.1	16464	22120
Vradi08g07340	MQTLLG8-3
Vradi08g07350	MQTLLG8-3	PHAVU_011G189300g	11	46602559	46604476		C.cajan_47395	KQ485507.1	27061	27558
Vradi08g07350	MQTLLG8-3	PHAVU_011G189300g	11	46602559	46604476		C.cajan_48026	KQ485184.1	13705	21040
Vradi08g07350	MQTLLG8-3	PHAVU_011G189200g	11	46594076	46595834		C.cajan_47395	KQ485507.1	27061	27558
Vradi08g07350	MQTLLG8-3	PHAVU_011G189200g	11	46594076	46595834		C.cajan_48026	KQ485184.1	13705	21040
Vradi08g07360	MQTLLG8-3	PHAVU_011G189800g	11	46652669	46659245		C.cajan_37064	KQ483793.1	137353	143642
Vradi08g07360	MQTLLG8-3	PHAVU_011G189800g	11	46652669	46659245		C.cajan_32257	KQ483555.1	16464	22120
Vradi08g07370	MQTLLG8-3	PHAVU_007G154800g	7	37811164	37816901	MQTL-YC7.5
Vradi08g07380	MQTLLG8-3	PHAVU_007G154700g	7	37801593	37806723	MQTL-YC7.5
Vradi08g07390	MQTLLG8-3
Vradi08g07400	MQTLLG8-3
Vradi08g07410	MQTLLG8-3	PHAVU_007G153900g	7	37715360	37719505	MQTL-YC7.5	C.cajan_02215	11	24451455	24453882
Vradi08g07420	MQTLLG8-3
Vradi08g07430	MQTLLG8-3
Vradi08g07440	MQTLLG8-3	PHAVU_007G153800g	7	37676371	37684835	MQTL-YC7.5	C.cajan_02221	11	24506044	24513739
Vradi08g07450	MQTLLG8-3	PHAVU_007G153700g	7	37652902	37660761	MQTL-YC7.5	C.cajan_02222	11	24519262	24525535
Vradi08g07460	MQTLLG8-3	PHAVU_007G153600g	7	37648732	37651275	MQTL-YC7.5	C.cajan_02223	11	24531736	24533478
Vradi08g07470	MQTLLG8-3
Vradi08g07480	MQTLLG8-3	PHAVU_007G049100g	7	3945193	3948439		C.cajan_07768	2	34648701	34651767
Vradi08g07480	MQTLLG8-3	PHAVU_007G0495000g	7	3979612	3980356		C.cajan_07768	2	34648701	34651767
Vradi08g07480	MQTLLG8-3	PHAVU_007G048900g	7	3931885	3934945		C.cajan_07768	2	34648701	34651767
Vradi08g07480	MQTLLG8-3	PHAVU_007G049000g	7	3936728	3939851		C.cajan_07768	2	34648701	34651767
Vradi08g07480	MQTLLG8-3	PHAVU_007G0495001g	7	3977169	3979346		C.cajan_07768	2	34648701	34651767
Vradi08g07490	MQTLLG8-3	PHAVU_007G153400g	7	37635561	37639469	MQTL-YC7.5	C.cajan_06603	2	22674300	22677562
Vradi08g07500	MQTLLG8-3	PHAVU_007G189400g	7	42569435	42573865		C.cajan_06604	2	22678628	22683250
Vradi08g07510	MQTLLG8-3	PHAVU_007G189500g	7	42587302	42587984		C.cajan_06606	2	22702210	22702506
Vradi08g07520	MQTLLG8-3	PHAVU_007G189600g	7	42591922	42593342		C.cajan_06607	2	22705565	22706681
Vradi08g07520	MQTLLG8-3	PHAVU_007G189600g	7	42591922	42593342		C.cajan_06608	2	22710587	22711733
Vradi08g07530	MQTLLG8-3	PHAVU_007G189700g	7	42607413	42616051		C.cajan_06610	2	22728193	22733014
Vradi08g07540	MQTLLG8-3	PHAVU_007G189800g	7	42616492	42618160		C.cajan_06611	2	22735452	22736730
Vradi08g07550	MQTLLG8-3	PHAVU_007G189900g	7	42618794	42620096		C.cajan_06612	2	22738800	22739853
Vradi08g07560	MQTLLG8-3	PHAVU_007G190100g	7	42632675	42642148		C.cajan_06618	2	22809763	22816659
Vradi08g07570	MQTLLG8-3	PHAVU_002G075400g	2	11018732	11023646	MQTL-YC2.3	C.cajan_12144	6	11621481	11629072
Vradi08g07570	MQTLLG8-3	PHAVU_002G075400g	2	11018732	11023646	MQTL-YC2.3	C.cajan_12144	6	11621481	11629072
Vradi08g07580	MQTLLG8-3	PHAVU_007G191700g	7	42808091	42810700		C.cajan_06642	2	23102593	23105644
Vradi08g07590	MQTLLG8-3	PHAVU_007G191600g	7	42799511	42806557		C.cajan_06641	2	23091923	23098244
Vradi08g07600	MQTLLG8-3	PHAVU_007G191500g	7	42795244	42798620		C.cajan_06637	2	23016190	23019561
Vradi08g07610	MQTLLG8-3
Vradi08g07620	MQTLLG8-3	PHAVU_007G191400g	7	42778808	42787102		C.cajan_06635	2	22999470	23008932
Vradi08g07620	MQTLLG8-3	PHAVU_007G191400g	7	42778808	42787102		C.cajan_14437	10	12617357	12617632
Vradi08g07620	MQTLLG8-3	PHAVU_007G191400g	7	42778808	42787102		C.cajan_33077	KQ483786.1	118571	118813
Vradi08g07620	MQTLLG8-3	PHAVU_007G191400g	7	42778808	42787102		C.cajan_46297	KQ486213.1	5086	7069
Vradi08g07630	MQTLLG8-3	PHAVU_007G191300g	7	42773729	42775270		C.cajan_06634	2	22993537	22995108
Vradi08g07640	MQTLLG8-3
Vradi08g07650	MQTLLG8-3	PHAVU_007G191200g	7	42753181	42759880		C.cajan_06633	2	22977716	22984240
Vradi08g07660	MQTLLG8-3	PHAVU_007G191100g	7	42738397	42744835		C.cajan_06629	2	22963684	22974199
Vradi08g07670	MQTLLG8-3	PHAVU_007G1906000g	7	42678174	42680521		C.cajan_06624	2	22889050	22893839
Vradi08g07670	MQTLLG8-3	PHAVU_007G1906001g	7	42675307	42676637		C.cajan_06624	2	22889050	22893839
Vradi08g07680	MQTLLG8-3
Vradi08g07690	MQTLLG8-3	PHAVU_007G190700g	7	42690559	42691011		C.cajan_06626	2	22922627	22923097
Vradi08g07700	MQTLLG8-3	PHAVU_007G190800g	7	42714036	42719343		C.cajan_06627	2	22950517	22955127
Vradi08g07710	MQTLLG8-3
Vradi08g07720	MQTLLG8-3	PHAVU_007G191000g	7	42728323	42729690
Vradi08g07730	MQTLLG8-3	PHAVU_007G190500g	7	42669154	42673692
Vradi08g07740	MQTLLG8-3	PHAVU_007G190400g	7	42665428	42667456		C.cajan_06621	2	22847488	22863428
Vradi08g07750	MQTLLG8-3	PHAVU_007G190300g	7	42660453	42665383		C.cajan_06620	2	22843076	22846783
Vradi08g07750	MQTLLG8-3	PHAVU_007G190300g	7	42660453	42665383		C.cajan_06622	2	22864721	22870024
Vradi08g07760	MQTLLG8-3
Vradi08g07770	MQTLLG8-3
Vradi08g07770	MQTLLG8-3
Vradi08g07780	MQTLLG8-3	PHAVU_007G154000g	7	37723839	37727868	MQTL-YC7.5	C.cajan_15621	8	2711453	2715818
Vradi08g07790	MQTLLG8-3	PHAVU_007G154100g	7	37736590	37739946	MQTL-YC7.5	C.cajan_02213	11	24424250	24428831
Vradi08g07800	MQTLLG8-3	PHAVU_007G1542001g	7	37746322	37752248	MQTL-YC7.5	C.cajan_02212	11	24417557	24421571
Vradi08g07810	MQTLLG8-3	PHAVU_007G154300g	7	37772432	37776661	MQTL-YC7.5	C.cajan_02211	11	24406185	24412981
Vradi08g07820	MQTLLG8-3	PHAVU_007G154400g	7	37777126	37778063	MQTL-YC7.5
Vradi08g07830	MQTLLG8-3	PHAVU_007G161100g	7	38931679	38935740	MQTL-YC7.5	C.cajan_42748	KQ484829.1	24474	26477
Vradi08g07840	MQTLLG8-3	PHAVU_007G161600g	7	38985780	38988247	MQTL-YC7.5	C.cajan_39539	KQ484080.1	9381	11095
Vradi08g07850	MQTLLG8-3	PHAVU_007G161700g	7	38998164	39000962	MQTL-YC7.5	C.cajan_39540	KQ484080.1	26650	28840
Vradi08g07860	MQTLLG8-3
Vradi08g07870	MQTLLG8-3
Vradi08g07880	MQTLLG8-3	PHAVU_007G161300g	7	38945067	38948107	MQTL-YC7.5	C.cajan_44036	KQ484844.1	11630	13301
Vradi08g07890	MQTLLG8-3	PHAVU_010G127200g	10	39688325	39690324		C.cajan_27665	KQ483454.1	69624	70223
Vradi08g07890	MQTLLG8-3	PHAVU_010G127200g	10	39688325	39690324		C.cajan_27682	KQ483454.1	292031	292630
Vradi08g07900	MQTLLG8-3	PHAVU_007G159400g	7	38590931	38593397	MQTL-YC7.5	C.cajan_37478	KQ483844.1	187661	188230
Vradi08g07910	MQTLLG8-3	PHAVU_007G159500g	7	38616516	38621915	MQTL-YC7.5	C.cajan_37473	KQ483844.1	135448	139692
Vradi08g07920	MQTLLG8-3	PHAVU_007G159600g	7	38643380	38645054	MQTL-YC7.5	C.cajan_37472	KQ483844.1	126519	127779
Vradi08g07930	MQTLLG8-3	PHAVU_007G159700g	7	38658503	38663830	MQTL-YC7.5	C.cajan_37471	KQ483844.1	115600	119831
Vradi08g07940	MQTLLG8-3	PHAVU_009G213600g	9	31630713	31633119		C.cajan_20516	1	14134713	14136898
Vradi08g07950	MQTLLG8-3	PHAVU_007G160000g	7	38703385	38705670	MQTL-YC7.5	C.cajan_37468	KQ483844.1	78071	80300
Vradi08g07960	MQTLLG8-3	PHAVU_007G160100g	7	38715140	38717984	MQTL-YC7.5	C.cajan_37466	KQ483844.1	65079	67800
Vradi08g07970	MQTLLG8-3						C.cajan_06212	2	18096935	18098044
Vradi08g07980	MQTLLG8-3
Vradi08g07990	MQTLLG8-3	PHAVU_007G160200g	7	38775969	38777009	MQTL-YC7.5	C.cajan_31715	KQ483549.1	103519	104604
Vradi08g08000	MQTLLG8-3	PHAVU_007G160300g	7	38780627	38781980	MQTL-YC7.5
Vradi08g08010	MQTLLG8-3	PHAVU_007G160400g	7	38789596	38802200	MQTL-YC7.5
Vradi08g08020	MQTLLG8-3	PHAVU_007G160500g	7	38803426	38805214	MQTL-YC7.5
Vradi08g08030	MQTLLG8-3	PHAVU_007G160600g	7	38821129	38830079	MQTL-YC7.5	C.cajan_31711	KQ483549.1	51806	53356
Vradi08g08040	MQTLLG8-3
Vradi08g08050	MQTLLG8-3
Vradi08g08060	MQTLLG8-3	PHAVU_005G045400g	5	4775130	4777363		C.cajan_46412	KQ484899.1	28460	30094
Vradi08g08060	MQTLLG8-3	PHAVU_005G041200g	5	4126072	4128058		C.cajan_46412	KQ484899.1	28460	30094
Vradi08g08070	MQTLLG8-3	PHAVU_007G160700g	7	38857472	38860064	MQTL-YC7.5	C.cajan_42745	KQ484829.1	5977	7323
Vradi08g08080	MQTLLG8-3	PHAVU_007G161200g	7	38941724	38942751	MQTL-YC7.5
Vradi08g08090	MQTLLG8-3	PHAVU_007G159100g	7	38553961	38560420	MQTL-YC7.5	C.cajan_41093	KQ484477.1	33425	39719
Vradi08g08100	MQTLLG8-3	PHAVU_007G159000g	7	38551904	38552756	MQTL-YC7.5	C.cajan_41094	KQ484477.1	41399	41887
Vradi08g08110	MQTLLG8-3	PHAVU_007G158900g	7	38538562	38539126	MQTL-YC7.5	C.cajan_41097	KQ484477.1	71642	72136
Vradi08g08120	MQTLLG8-3
Vradi08g08130	MQTLLG8-3	PHAVU_007G158800g	7	38513629	38518349	MQTL-YC7.5	C.cajan_42894	KQ484201.1	63834	68479
Vradi08g08140	MQTLLG8-3	PHAVU_007G158700g	7	38504639	38508100	MQTL-YC7.5	C.cajan_42891	KQ484201.1	28919	30650
Vradi08g08150	MQTLLG8-3	PHAVU_007G158600g	7	38500837	38504526	MQTL-YC7.5	C.cajan_42890	KQ484201.1	22201	28265
Vradi08g08160	MQTLLG8-3	PHAVU_007G158500g	7	38461797	38464797	MQTL-YC7.5
Vradi08g08170	MQTLLG8-3
Vradi08g08180	MQTLLG8-3	PHAVU_007G158400g	7	38438477	38442429	MQTL-YC7.5	C.cajan_06598	2	22612751	22615475
Vradi08g08190	MQTLLG8-3	PHAVU_007G158300g	7	38434007	38435783	MQTL-YC7.5	C.cajan_06592	2	22564576	22565292
Vradi08g08190	MQTLLG8-3	PHAVU_010G109000g	10	36988252	36996476		C.cajan_06592	2	22564576	22565292
Vradi08g08200	MQTLLG8-3	PHAVU_007G158200g	7	38432067	38432769	MQTL-YC7.5	C.cajan_06594	2	22578154	22578573
Vradi08g08210	MQTLLG8-3	PHAVU_007G158100g	7	38418307	38421225	MQTL-YC7.5	C.cajan_06593	2	22573677	22576679
Vradi08g08220	MQTLLG8-3	PHAVU_007G158000g	7	38411928	38418290	MQTL-YC7.5	C.cajan_06591	2	22552068	22561682
Vradi08g08230	MQTLLG8-3
Vradi08g08240	MQTLLG8-3	PHAVU_007G157900g	7	38399070	38409934	MQTL-YC7.5	C.cajan_06590	2	22540060	22549287
Vradi08g08250	MQTLLG8-3	PHAVU_007G157800g	7	38352069	38354191	MQTL-YC7.5
Vradi08g08260	MQTLLG8-3	PHAVU_007G157600g	7	38313015	38313365	MQTL-YC7.5
Vradi08g08270	MQTLLG8-3	PHAVU_007G157500g	7	38309137	38312531	MQTL-YC7.5	C.cajan_06579	2	22458779	22462731
Vradi08g08280	MQTLLG8-3
Vradi08g08290	MQTLLG8-3	PHAVU_011G069000g	11	6008541	6011612		C.cajan_02315	11	25418474	25419973
Vradi08g08300	MQTLLG8-3
Vradi08g08310	MQTLLG8-3	PHAVU_007G157400g	7	38261335	38265910	MQTL-YC7.5
Vradi08g08320	MQTLLG8-3	PHAVU_007G157200g	7	38234985	38238072	MQTL-YC7.5	C.cajan_06578	2	22408408	22411351
Vradi08g08330	MQTLLG8-3	PHAVU_007G157100g	7	38230662	38233114	MQTL-YC7.5
Vradi08g08340	MQTLLG8-3	PHAVU_007G157000g	7	38193916	38196404	MQTL-YC7.5	C.cajan_06576	2	22375438	22376946
Vradi08g08340	MQTLLG8-3	PHAVU_007G157000g	7	38193916	38196404	MQTL-YC7.5	C.cajan_06577	2	22398688	22400208
Vradi08g08340	MQTLLG8-3	PHAVU_007G157000g	7	38193916	38196404	MQTL-YC7.5	C.cajan_06574	2	22351422	22352930
Vradi08g08350	MQTLLG8-3	PHAVU_007G156900g	7	38184374	38186958	MQTL-YC7.5	C.cajan_06576	2	22375438	22376946
Vradi08g08350	MQTLLG8-3	PHAVU_007G156900g	7	38184374	38186958	MQTL-YC7.5	C.cajan_06577	2	22398688	22400208
Vradi08g08350	MQTLLG8-3	PHAVU_007G156900g	7	38184374	38186958	MQTL-YC7.5	C.cajan_06574	2	22351422	22352930
Vradi08g08360	MQTLLG8-3	PHAVU_007G156700g	7	38102266	38102562	MQTL-YC7.5
Vradi08g08370	MQTLLG8-3	PHAVU_007G191800g	7	42813486	42821646		C.cajan_06643	2	23121184	23128006
Vradi08g08380	MQTLLG8-3	PHAVU_007G191900g	7	42823964	42828449		C.cajan_06646	2	23134977	23138363
Vradi08g08390	MQTLLG8-3
Vradi08g08400	MQTLLG8-3	PHAVU_007G192000g	7	42829345	42835441		C.cajan_06647	2	23141166	23150183
Vradi08g08410	MQTLLG8-3
Vradi08g08420	MQTLLG8-3	PHAVU_007G192100g	7	42883129	42887532		C.cajan_06648	2	23211971	23216917
Vradi08g08430	MQTLLG8-3	PHAVU_007G192300g	7	42951648	42956680		C.cajan_06651	2	23320220	23323836
Vradi08g08440	MQTLLG8-3	PHAVU_007G192400g	7	42980734	42985387		C.cajan_06652	2	23336994	23338067
Vradi08g08450	MQTLLG8-3	PHAVU_007G192500g	7	42987414	42996177		C.cajan_34800	KQ483634.1	311498	312730
Vradi08g08460	MQTLLG8-3
Vradi08g14780	MQTLLG8-5	PHAVU_007G123500g	7	23474068	23483137	MQTL-YC7.5	C.cajan_38168	KQ484041.1	122540	129329
Vradi08g14790	MQTLLG8-5	PHAVU_007G123600g	7	23486311	23488722	MQTL-YC7.5	C.cajan_38169	KQ484041.1	131721	133242
Vradi08g14800	MQTLLG8-5	PHAVU_007G123800g	7	23550431	23556705	MQTL-YC7.5	C.cajan_07172	2	28319224	28323259
Vradi08g14810	MQTLLG8-5						C.cajan_07171	2	28316013	28316320
Vradi08g14820	MQTLLG8-5	PHAVU_007G124000g	7	23567515	23571044	MQTL-YC7.5	C.cajan_07170	2	28311703	28314850
Vradi08g14830	MQTLLG8-5	PHAVU_007G124100g	7	23586301	23589156	MQTL-YC7.5	C.cajan_07169	2	28302283	28303939
Vradi08g14840	MQTLLG8-5	PHAVU_007G124200g	7	23614660	23621010	MQTL-YC7.5	C.cajan_07168	2	28278964	28285856
Vradi08g14850	MQTLLG8-5	PHAVU_007G124300g	7	23652379	23653357	MQTL-YC7.5	C.cajan_07167	2	28276793	28277814
Vradi08g14860	MQTLLG8-5	PHAVU_007G124400g	7	23654997	23662729	MQTL-YC7.5	C.cajan_07166	2	28270674	28275226
Vradi08g14860	MQTLLG8-5	PHAVU_007G124400g	7	23654997	23662729	MQTL-YC7.5	C.cajan_07166	2	28270674	28275226
Vradi08g14870	MQTLLG8-5	PHAVU_007G1245000g	7	23771553	23774548	MQTL-YC7.5	C.cajan_07165	2	28251944	28263579
Vradi08g14870	MQTLLG8-5	PHAVU_007G1245001g	7	23764302	23768374	MQTL-YC7.5	C.cajan_07165	2	28251944	28263579
Vradi08g14870	MQTLLG8-5	PHAVU_007G1245000g	7	23771553	23774548	MQTL-YC7.5	C.cajan_07165	2	28251944	28263579
Vradi08g14870	MQTLLG8-5	PHAVU_007G1245001g	7	23764302	23768374	MQTL-YC7.5	C.cajan_07165	2	28251944	28263579
Vradi08g14880	MQTLLG8-5	PHAVU_007G124800g	7	23814842	23818869	MQTL-YC7.5	C.cajan_07163	2	28223801	28226222
Vradi08g14880	MQTLLG8-5	PHAVU_007G124800g	7	23814842	23818869	MQTL-YC7.5	C.cajan_07163	2	28223801	28226222
Vradi08g14890	MQTLLG8-5
Vradi09g08670	MQTLLG9-4	PHAVU_010G0720000g	10	19729489	19730647		C.cajan_36490	KQ483731.1	130369	133761
Vradi09g08670	MQTLLG9-4	PHAVU_010G0720001g	10	19722175	19722506		C.cajan_36490	KQ483731.1	130369	133761
Vradi09g08960	MQTLLG9-5	PHAVU_003G194000g	3	40613465	40615689		C.cajan_39108	KQ483787.1	62629	64368
Vradi10g01200	MQTLLG10-2
Vradi10g01210	MQTLLG10-2
Vradi10g01220	MQTLLG10-2	PHAVU_008G162400g	8	41644218	41646583	MQTL-YC8.3	C.cajan_29846	KQ483583.1	105083	105889
Vradi10g01220	MQTLLG10-2	PHAVU_008G162400g	8	41644218	41646583	MQTL-YC8.3	C.cajan_23902	KQ483414.1	414922	415617
Vradi10g01220	MQTLLG10-2	PHAVU_004G133300g	4	41094641	41096314		C.cajan_29846	KQ483583.1	105083	105889
Vradi10g01220	MQTLLG10-2	PHAVU_004G133300g	4	41094641	41096314		C.cajan_23902	KQ483414.1	414922	415617
Vradi10g01230	MQTLLG10-2	PHAVU_009G053200g	9	9929819	9933008		C.cajan_08845	3	8560552	8563017
Vradi10g01240	MQTLLG10-2
Vradi10g01250	MQTLLG10-2
Vradi10g01260	MQTLLG10-2	PHAVU_009G053400g	9	9986647	9998180		C.cajan_08841	3	8495941	8505398
Vradi10g01270	MQTLLG10-2	PHAVU_009G053500g	9	10001968	10007123		C.cajan_08838	3	8479926	8485062
Vradi10g01280	MQTLLG10-2	PHAVU_009G053600g	9	10020010	10027651		C.cajan_08836	3	8454489	8459816
Vradi10g01290	MQTLLG10-2	PHAVU_009G053700g	9	10031989	10040231		C.cajan_08833	3	8433259	8440858
Vradi10g02230	MQTLLG10-3
Vradi10g02240	MQTLLG10-3	PHAVU_006G048800g	6	16374488	16379990	MQTL-YC6.1	C.cajan_02657	11	29198704	29203387
Vradi10g02250	MQTLLG10-3	PHAVU_006G049000g	6	16387144	16392517	MQTL-YC6.1	C.cajan_25464	KQ483427.1	13837	20581
Vradi10g02260	MQTLLG10-3	PHAVU_006G049100g	6	16393073	16396019	MQTL-YC6.1	C.cajan_25463	KQ483427.1	9629	12469
Vradi10g02270	MQTLLG10-3
Vradi10g02280	MQTLLG10-3						C.cajan_05003	2	5546277	5546909
Vradi10g02280	MQTLLG10-3						C.cajan_11882	6	9061124	9062123
Vradi10g02280	MQTLLG10-3						C.cajan_04999	2	5522733	5523407
Vradi10g02280	MQTLLG10-3						C.cajan_05943	2	15178796	15179071
Vradi10g02280	MQTLLG10-3						C.cajan_05942	2	15175016	15175549
Vradi10g02280	MQTLLG10-3						C.cajan_17060	8	18244068	18245222
Vradi10g02280	MQTLLG10-3						C.cajan_04980	2	5351939	5352613
Vradi10g02280	MQTLLG10-3						C.cajan_19778	1	6182649	6183626
Vradi10g02290	MQTLLG10-3	PHAVU_006G049300g	6	16407022	16408456	MQTL-YC6.1	C.cajan_25461	KQ483427.1	2134	4878
Vradi10g02300	MQTLLG10-3	PHAVU_006G049700g	6	16429820	16431119	MQTL-YC6.1	C.cajan_07445	2	31100201	31101241
Vradi10g02310	MQTLLG10-3	PHAVU_006G0498001g	6	16436184	16438137	MQTL-YC6.1	C.cajan_07447	2	31116492	31118213
Vradi10g02320	MQTLLG10-3	PHAVU_006G049900g	6	16454776	16458734	MQTL-YC6.1	C.cajan_07450	2	31155865	31158446
Vradi10g02330	MQTLLG10-3	PHAVU_006G050000g	6	16463488	16464898	MQTL-YC6.1
Vradi10g02340	MQTLLG10-3	PHAVU_006G050100g	6	16465815	16466472	MQTL-YC6.1	C.cajan_07451	2	31176944	31177270
Vradi10g02350	MQTLLG10-3	PHAVU_006G050200g	6	16466946	16472088	MQTL-YC6.1	C.cajan_07452	2	31178057	31185169
Vradi10g02360	MQTLLG10-3
Vradi10g02370	MQTLLG10-3	PHAVU_006G191000g	6	29863303	29867198	MQTL-YC6.5	C.cajan_10633	3	26169915	26173307
Vradi10g02370	MQTLLG10-3	PHAVU_006G191000g	6	29863303	29867198	MQTL-YC6.5	C.cajan_31580	KQ483610.1	73689	76798
Vradi10g02370	MQTLLG10-3	PHAVU_006G029300g	6	12411644	12417662	MQTL-YC6.1	C.cajan_10633	3	26169915	26173307
Vradi10g02370	MQTLLG10-3	PHAVU_006G029300g	6	12411644	12417662	MQTL-YC6.1	C.cajan_31580	KQ483610.1	73689	76798
Vradi10g02380	MQTLLG10-3
Vradi10g02390	MQTLLG10-3	PHAVU_006G132900g	6	24772424	24774804	MQTL-YC6.5	C.cajan_27902	KQ483493.1	5872	6321
Vradi10g02400	MQTLLG10-3	PHAVU_006G050800g	6	16561686	16570031	MQTL-YC6.1	C.cajan_36354	KQ484063.1	116705	128924
Vradi10g02410	MQTLLG10-3
Vradi10g02420	MQTLLG10-3	PHAVU_006G050900g	6	16590397	16593793	MQTL-YC6.1	C.cajan_36352	KQ484063.1	98796	102221
Vradi10g02430	MQTLLG10-3	PHAVU_006G051000g	6	16598445	16602039	MQTL-YC6.1	C.cajan_36351	KQ484063.1	87972	92140
Vradi10g02440	MQTLLG10-3	PHAVU_006G051200g	6	16606733	16611282	MQTL-YC6.1
Vradi10g02450	MQTLLG10-3	PHAVU_006G051300g	6	16611804	16614274	MQTL-YC6.1	C.cajan_36348	KQ484063.1	73441	75635
Vradi10g02450	MQTLLG10-3	PHAVU_006G051300g	6	16611804	16614274	MQTL-YC6.1	C.cajan_36345	KQ484063.1	60761	62810
Vradi10g02460	MQTLLG10-3	PHAVU_006G051400g	6	16615643	16618406	MQTL-YC6.1	C.cajan_36347	KQ484063.1	69712	72685
Vradi10g02470	MQTLLG10-3	PHAVU_006G051500g	6	16620560	16623631	MQTL-YC6.1
Vradi10g02480	MQTLLG10-3	PHAVU_006G052400g	6	16692492	16696742	MQTL-YC6.1	C.cajan_10552	3	25444894	25447023
[truncated: 333 more rows]

## Sheet: Table S8
Table S8. Gene annotation information in breeder's MQTLs region
Breeder's MQTL	Gene ID	Start (bp)	End (bp)	Description
MQTLLG1-6	Vradi01g07350	11718746	11724927	Ribosome biogenesis protein WDR12 homolog
MQTLLG1-6	Vradi01g07360	11764326	11765471
MQTLLG1-6	Vradi01g07370	11783919	11786887
MQTLLG1-6	Vradi01g07380	11792294	11810264	Sister chromatid cohesion protein SCC2
MQTLLG1-6	Vradi01g07390	11814249	11817945
MQTLLG1-9	Vradi01g11620	22753477	22756554	eukaryotic translation initiation factor NCBP
MQTLLG1-9	Vradi01g11630	22815502	22827721
MQTLLG1-9	Vradi01g11640	22854226	22855819
MQTLLG2-5	Vradi02g06800	7738764	7741402
MQTLLG2-5	Vradi02g06810	7760798	7766385
MQTLLG2-5	Vradi02g06820	7769874	7773446
MQTLLG2-5	Vradi02g06830	7786866	7790763
MQTLLG2-5	Vradi02g06840	7791746	7795513
MQTLLG3-4	Vradi03g02770	3830879	3849094
MQTLLG3-5	Vradi03g06990	8465720	8469776
MQTLLG3-5	Vradi03g07000	8470415	8474998	Pectin acetylesterase
MQTLLG3-5	Vradi03g07010	8479364	8482235	uncharacterized protein C24B11.05
MQTLLG3-5	Vradi03g07020	8482452	8488557	Rotamase CYP 4
MQTLLG3-5	Vradi03g07030	8497540	8503382	protein phosphatase 2C 32
MQTLLG3-5	Vradi03g07040	8506137	8507822
MQTLLG3-5	Vradi03g07050	8508978	8510026	Expansin
MQTLLG3-5	Vradi03g07060	8513597	8516913	MAN1
MQTLLG3-5	Vradi03g07070	8520975	8524325	Plastidic large subunit of ADP-glucose pyrophosphorylase (AGP), Starch synthesis in rice polle
MQTLLG3-5	Vradi03g07080	8526460	8537308
MQTLLG3-5	Vradi03g07090	8541092	8546602
MQTLLG3-5	Vradi03g07100	8558942	8577805
MQTLLG3-5	Vradi03g07110	8581225	8586710
MQTLLG3-5	Vradi03g07120	8590612	8595727
MQTLLG3-5	Vradi03g07130	8597249	8600134
MQTLLG3-5	Vradi03g07140	8602254	8602640	uncharacterized protein LOC106757494 isoform X1
MQTLLG3-5	Vradi03g07150	8611076	8615979
MQTLLG4-6	Vradi04g03300	6709315	6712290	UDP-D-apiose/UDP-D-xylose synthase 2
MQTLLG4-6	Vradi04g03310	6719040	6723055
MQTLLG4-6	Vradi04g03320	6723845	6726692
MQTLLG4-6	Vradi04g03330	6730490	6744088	AP-2 complex subunit alpha
MQTLLG4-6	Vradi04g03340	6744490	6752363
MQTLLG4-6	Vradi04g03350	6759151	6771133	DNA repair protein RAD5A
MQTLLG4-6	ENSRNA050006203	6779759	6779830	tRNA-Pro for anticodon AGG
MQTLLG4-6	Vradi04g03360	6802241	6805388
MQTLLG4-6	Vradi04g03370	6808941	6809637	uncharacterized protein At4g22758-like
MQTLLG4-6	Vradi04g03380	6812819	6830409
MQTLLG4-6	ENSRNA050006199	6832281	6832352	tRNA-Met for anticodon CAU
MQTLLG4-6	Vradi04g03390	6840081	6847306	Protein TIC 100
MQTLLG5-1	Vradi05g04570	7212651	7214324
MQTLLG5-1	Vradi05g04580	7218729	7218968
MQTLLG5-1	Vradi05g04590	7232901	7240313
MQTLLG5-1	Vradi05g04600	7256203	7256475
MQTLLG5-1	Vradi05g04610	7291779	7293622	uncharacterized protein LOC106761207
MQTLLG5-1	Vradi05g04620	7314298	7318524
MQTLLG5-1	Vradi05g04630	7324505	7327852	plant intracellular Ras-group-related LRR protein 9-like
MQTLLG5-1	Vradi05g04640	7329372	7331317	UDP-glycosyltransferase 87A1-like
MQTLLG5-1	Vradi05g04650	7336692	7340593
MQTLLG5-1	Vradi05g04660	7351737	7351994
MQTLLG5-1	Vradi05g04670	7365115	7370103
MQTLLG5-1	Vradi05g04680	7450629	7454774
MQTLLG5-1	Vradi05g04690	7455481	7456913
MQTLLG5-1	Vradi05g04700	7461304	7465434	probable serine/threonine-protein kinase WNK3 isoform X1
MQTLLG5-3	Vradi05g08460	16335543	16337933	uncharacterized protein LOC106762766
MQTLLG5-3	Vradi05g08470	16346209	16348189
MQTLLG5-3	Vradi05g08480	16355000	16356219	EPIDERMAL PATTERNING FACTOR-like protein 2 isoform X1
MQTLLG5-3	Vradi05g08490	16356855	16360814
MQTLLG5-3	Vradi05g08500	16374525	16387171
MQTLLG5-3	Vradi05g08510	16388857	16401295
MQTLLG5-3	Vradi05g08520	16418937	16421495	serine/threonine-protein kinase Aurora-2
MQTLLG5-3	Vradi05g08530	16421915	16430390	ATP-dependent 6-phosphofructokinase
MQTLLG5-3	Vradi05g08540	16432580	16438731
MQTLLG5-3	Vradi05g08550	16438999	16442274	receptor-like protein kinase HSL1
MQTLLG5-3	Vradi05g08560	16445407	16457539
MQTLLG5-3	Vradi05g08570	16465495	16466031
MQTLLG5-3	Vradi05g08580	16470793	16481130	Nucleotidylyl transferase superfamily protein
MQTLLG5-3	Vradi05g08590	16484690	16490099	protein cereblon
MQTLLG5-3	Vradi05g08600	16491162	16495399
MQTLLG5-3	Vradi05g08610	16510901	16514481
MQTLLG5-3	Vradi05g08620	16517002	16522616
MQTLLG5-3	Vradi05g08630	16532899	16533429	uncharacterized protein LOC106761748
MQTLLG5-3	Vradi05g08640	16557594	16561303	monoglyceride lipase
MQTLLG5-3	Vradi05g08650	16571349	16575972
MQTLLG5-3	Vradi05g08660	16585823	16589761	probably inactive leucine-rich repeat receptor-like protein kinase At2g25790 isoform X1
MQTLLG5-3	Vradi05g08670	16602120	16607934	Homeobox-leucine zipper protein ATHB-8
MQTLLG5-3	Vradi05g08680	16626117	16627638
MQTLLG5-3	Vradi05g08690	16634933	16635254
MQTLLG5-3	Vradi05g08700	16637509	16640520	peptidyl-tRNA hydrolase 2, mitochondrial isoform X2
MQTLLG5-3	Vradi05g08710	16641337	16643457
MQTLLG5-3	Vradi05g08720	16644793	16647851
MQTLLG5-3	Vradi05g08730	16649257	16651420
MQTLLG5-3	Vradi05g08740	16652201	16653112
MQTLLG5-4	Vradi05g06870	13873522	13875033	nodulation-signaling pathway 2 protein-like
MQTLLG5-4	Vradi05g06880	13889572	13890733
MQTLLG5-4	Vradi05g06890	13899472	13902054	G-type lectin S-receptor-like serine/threonine-protein kinase At5g35370
MQTLLG5-4	Vradi05g06900	13902932	13908509
MQTLLG5-4	Vradi05g06910	13910002	13913672
MQTLLG5-4	Vradi05g06920	13914839	13917566
MQTLLG5-4	Vradi05g06930	13926939	13927356
MQTLLG5-4	Vradi05g06940	13930584	13930880
MQTLLG5-4	Vradi05g06950	13932005	13932235
MQTLLG5-4	Vradi05g06960	13949186	13949983
MQTLLG5-4	Vradi05g06970	13974432	13976677
MQTLLG5-4	Vradi05g06980	13994293	13996805	Ubiquitin-fold modifier 1
MQTLLG5-4	Vradi05g06990	13998759	14002645	Pentatricopeptide repeat-containing protein At4g08210
MQTLLG5-4	Vradi05g07000	14004777	14007037	uncharacterized protein LOC106759902
MQTLLG5-4	Vradi05g07010	14010945	14014524
MQTLLG5-7	Vradi05g22420	34408740	34412008
MQTLLG5-7	Vradi05g22430	34422469	34425333	probable WRKY transcription factor 31
MQTLLG5-7	Vradi05g22440	34431271	34434605
MQTLLG5-7	Vradi05g22450	34442189	34443376	mitogen-activated protein kinase kinase kinase 2-like
MQTLLG5-7	Vradi05g22460	34444603	34446889	B-cell receptor-associated protein 31-like
MQTLLG5-7	Vradi05g22470	34448126	34455537	DNA repair protein RAD16-like isoform X2
MQTLLG5-7	Vradi05g22480	34462642	34463112
MQTLLG5-7	Vradi05g22490	34468737	34471414	uncharacterized protein LOC106761340 isoform X1
MQTLLG5-7	Vradi05g22500	34474250	34480710
MQTLLG5-7	ENSRNA050005915	34486482	34486582	microRNA MIR171_1
MQTLLG5-7	Vradi05g22510	34495700	34498038	Transcription factor MYB101
MQTLLG5-7	Vradi05g22520	34518566	34522935
MQTLLG5-7	ENSRNA050006405	34522841	34522914	tRNA-Asn for anticodon GUU
MQTLLG5-7	ENSRNA050005914	34539425	34539524	microRNA MIR171_1
MQTLLG5-7	Vradi05g22530	34549629	34552812
MQTLLG5-7	Vradi05g22540	34583438	34586483
MQTLLG5-7	Vradi05g22550	34600422	34609650
MQTLLG5-7	Vradi05g22560	34630645	34640327
MQTLLG5-7	Vradi05g22570	34642482	34644150	probable protein phosphatase 2C 11
MQTLLG5-7	Vradi05g22580	34647572	34648214
MQTLLG5-7	Vradi05g22590	34684810	34696842
MQTLLG5-7	Vradi05g22600	34714674	34719615
MQTLLG5-7	Vradi05g22610	34736051	34749966
MQTLLG5-7	Vradi05g22620	34775059	34782002
MQTLLG5-7	Vradi05g22630	34827746	34828440
MQTLLG5-7	Vradi05g22640	34848212	34848772	uncharacterized protein LOC106760659
MQTLLG5-7	Vradi05g22650	34864479	34872212
MQTLLG5-7	Vradi05g22660	34873224	34874575
MQTLLG5-7	Vradi05g22670	34875275	34876493
MQTLLG5-7	Vradi05g22680	34882935	34883695
MQTLLG5-7	Vradi05g22690	34887251	34889927	APO protein 4, mitochondrial
MQTLLG5-7	Vradi05g22700	34891793	34892542	uncharacterized protein LOC106760661
MQTLLG6-3	Vradi06g07910	13083772	13087088	uncharacterized protein LOC106764092
MQTLLG6-3	Vradi06g07920	13105499	13108821
MQTLLG6-3	Vradi06g07930	13167517	13171621
MQTLLG6-3	Vradi06g07940	13188014	13192951
MQTLLG6-3	Vradi06g07950	13233864	13242051
MQTLLG6-3	Vradi06g07960	13256184	13257511
MQTLLG6-3	Vradi06g07970	13644168	13644596
MQTLLG6-3	Vradi06g07980	13676957	13681521
MQTLLG6-3	Vradi06g07990	13730573	13741574
MQTLLG6-5	Vradi06g15780	35950451	35958889
MQTLLG6-5	Vradi06g15790	35998238	36009817
MQTLLG6-5	Vradi06g15800	36015239	36017515
MQTLLG6-5	Vradi06g15810	36023006	36025345
MQTLLG6-5	Vradi06g15820	36027135	36027866
MQTLLG6-5	Vradi06g15830	36036084	36036654
MQTLLG6-5	Vradi06g15840	36040389	36052086	S-adenosyl-L-methionine-dependent tRNA 4-demethylwyosine synthase
MQTLLG6-5	Vradi06g15850	36055395	36060459	probable LRR receptor-like serine/threonine-protein kinase At2g16250
MQTLLG6-5	Vradi06g15860	36080132	36080467
MQTLLG6-5	Vradi06g15870	36082690	36088274	maf-like protein DDB_G0281937 isoform X3
MQTLLG6-5	Vradi06g15880	36091445	36092911	3-ketoacyl-CoA synthase
MQTLLG6-5	Vradi06g15890	36094776	36099789
MQTLLG6-5	Vradi06g15900	36104594	36104842
MQTLLG6-5	Vradi06g15910	36106269	36108214
[truncated: 183 more rows]

## Sheet: Table S9
Table S9. Rice and Arabidopsis genes and their orthologs in the breeder's MQTL regions associated with yield and yield-related traits
[truncated: 47 more rows]
